# Supplementary material for: Nuclear and cytosolic J-domain proteins provide synergistic control of Hsf1 at distinct phases of the heat shock response
Source: bioRxiv preprint, doi:10.1101/2025.04.14.648540, version 2 (2025-07-08)
Supplement: RH_Table_S5_DeSeq2_log2fc_timecourse [file 648540_file05.xlsx]

## Sheet: Sheet 1 - DeSeq2_log2fc_timecou
genes	strain	log2FC	timepoint	pvalue	lfcSE
YBR230W-A	WT	0	0	0	0
YBR230W-A	WT	1.7294024799145578	10	4.108348673732655e-6	0.3754816314352264
YBR230W-A	WT	0.8483003584817407	60	0.028387207107116647	0.3870171656443301
HRT3	WT	0	0	0	0
HRT3	WT	0.21498025008247518	10	0.7852503427084836	0.7889663703015537
HRT3	WT	0.10126792252916951	60	0.8977078336722656	0.7877250163346232
PRM4	WT	0	0	0	0
PRM4	WT	0.0933274658391475	10	0.8984155815489446	0.7310448770535365
PRM4	WT	-0.2535541547003519	60	0.7335311952813075	0.7448010955750315
TIM21	WT	0	0	0	0
TIM21	WT	-0.12214516776127045	10	0.7016676752097133	0.31885839962705037
TIM21	WT	-0.08691452903534967	60	0.7824809254912303	0.31480800603307796
RMD5	WT	0	0	0	0
RMD5	WT	1.6091729998771525	10	1.1538800663677002e-4	0.4173466111594349
RMD5	WT	0.2902590345037845	60	0.5132911292400552	0.44401010519350653
CCC1	WT	0	0	0	0
CCC1	WT	0.48320048636744023	10	0.06033172385495738	0.2572457311776323
CCC1	WT	0.3899778762820258	60	0.1286326321396385	0.2566460925839036
NHP10	WT	0	0	0	0
NHP10	WT	0.43818901798888354	10	0.16875221739554372	0.31839943153763245
NHP10	WT	0.22055671733510285	60	0.48919652319306567	0.31891376414363454
ILV1	WT	0	0	0	0
ILV1	WT	-1.4196300014451295	10	0.002979235995930089	0.47801045793403935
ILV1	WT	-0.3186863379243984	60	0.4969944450169957	0.4691901769048758
PTK1	WT	0	0	0	0
PTK1	WT	0.0025970417191009073	10	0.9952031570747022	0.4319772486203388
PTK1	WT	-0.2867920291184914	60	0.5092784414476859	0.4345586295221545
YOL046C	WT	0	0	0	0
YOL046C	WT	0.9231763332720836	10	0.5625028048499987	1.5940799360125968
YOL046C	WT	-3.2263308656588836	60	0.05586013013595978	1.6873010048574422
YBR116C	WT	0	0	0	0
YBR116C	WT	4.849567375403212	10	1.2438392573484911e-5	1.1098021077647429
YBR116C	WT	0.7299199723983026	60	0.577686783269237	1.3109977064057547
OSH6	WT	0	0	0	0
OSH6	WT	0.005717085613624351	10	0.979534590936411	0.2228674780835636
OSH6	WT	0.01881417403078573	60	0.9319675949026717	0.22038504972549425
YML053C	WT	0	0	0	0
YML053C	WT	0.55101935207072394	10	0.11088745618504378	0.34563636994327795
YML053C	WT	0.41779885432052205	60	0.22674829353807482	0.3456374844471823
SLM2	WT	0	0	0	0
SLM2	WT	-0.10594081301671128	10	0.757224534152034	0.34270910848169706
SLM2	WT	-0.04397955545032639	60	0.8960039214931825	0.336464044488435
YJR096W	WT	0	0	0	0
YJR096W	WT	2.385962552874976	10	1.3527963245924381e-19	0.26346660039251296
YJR096W	WT	1.0395140925902684	60	1.6469269435877501e-4	0.2758941948613821
TOA2	WT	0	0	0	0
TOA2	WT	-0.3771814648370681	10	0.08517136541184317	0.21910835871400228
TOA2	WT	-0.04231255752072377	60	0.8421922646071065	0.21252969052705456
ODC1	WT	0	0	0	0
ODC1	WT	-0.4683224685102534	10	0.24055563998737745	0.39904807922047414
ODC1	WT	0.2916904523527934	60	0.42848233820795517	0.3683930708489674
COA6	WT	0	0	0	0
COA6	WT	1.2098458213568772	10	0.0013427118617157104	0.37728794615288314
COA6	WT	1.0255120872606418	60	0.006609149057724638	0.3775926164211801
MDV1	WT	0	0	0	0
MDV1	WT	0.6822809024176243	10	0.06254658008066642	0.36634477807150506
MDV1	WT	0.04940511843988561	60	0.8967093406528471	0.38056816890227396
LRO1	WT	0	0	0	0
LRO1	WT	1.2926433272879887	10	0.019817804245928775	0.5548350330486085
LRO1	WT	0.5860523892201314	60	0.2982327032713146	0.5633869051932431
BUD32	WT	0	0	0	0
BUD32	WT	-1.0536034339342426	10	4.8437918607900947e-4	0.30195705301421477
BUD32	WT	-0.05433357489826104	60	0.8439702759483326	0.27606054683067854
PHO5	WT	0	0	0	0
PHO5	WT	-0.6282952381920445	10	0.3676813638270882	0.6974664625380189
PHO5	WT	-0.4693324097845229	60	0.4988759180330066	0.6940123248268921
MTD1	WT	0	0	0	0
MTD1	WT	-0.6944953981061628	10	0.030421126768228186	0.3208477782130278
MTD1	WT	0.7355144329562487	60	0.017217616806792506	0.30877664811166033
MET32	WT	0	0	0	0
MET32	WT	-0.8557214729681628	10	0.4075424212505142	1.0331978098373187
MET32	WT	-0.14643570573738374	60	0.8764011045155662	0.9415086385164076
NOP8	WT	0	0	0	0
NOP8	WT	-2.9652124904489345	10	1.3958468038123501e-11	0.4387488435890592
NOP8	WT	-0.27660812365767207	60	0.4257613091594357	0.3472943867284364
CDC31	WT	0	0	0	0
CDC31	WT	0.6004634583491176	10	0.019676027135583977	0.2574368341111926
CDC31	WT	0.23229862507592372	60	0.3702996919776444	0.2592872847095704
YDL016C	WT	0	0	0	0
YDL016C	WT	0.860292025775168	10	0.766521807436486	2.897312725724741
YDL016C	WT	-0.7438120110720525	60	0.8035734435278968	2.990498571105784
YKR051W	WT	0	0	0	0
YKR051W	WT	0.2056926180072591	10	0.7454086724199933	0.6334865047064254
YKR051W	WT	-0.8434057442098463	60	0.19714219220990248	0.6539365219374254
SCW11	WT	0	0	0	0
SCW11	WT	-0.49914942959214176	10	0.4369333989765244	0.6420902425319602
SCW11	WT	-0.6881283486302091	60	0.2841624061651437	0.6425007586361527
MPM1	WT	0	0	0	0
MPM1	WT	2.013171336901148	10	5.938741344394253e-17	0.24062473689071157
MPM1	WT	1.140987800512346	60	3.939901953880433e-6	0.24725993001465005
MTC1	WT	0	0	0	0
MTC1	WT	0.0725171473823349	10	0.6919914514399558	0.18305293964015043
MTC1	WT	-0.14521364265173786	60	0.4281541159614216	0.18326857300920804
PEX13	WT	0	0	0	0
PEX13	WT	0.13437351459280683	10	0.7540190194857621	0.4288364934937781
PEX13	WT	0.04745945941679886	60	0.911518395187217	0.4270874240733128
MSB2	WT	0	0	0	0
MSB2	WT	-0.7178008325637079	10	0.3152838082672522	0.7148010209446168
MSB2	WT	0.05719574874192372	60	0.9353335610336325	0.7049341881836023
NUS1	WT	0	0	0	0
NUS1	WT	1.1273843685947242	10	0.025473383251449627	0.5046150597382625
NUS1	WT	0.22593738579147543	60	0.6605158388659091	0.5144281137892295
SSU1	WT	0	0	0	0
SSU1	WT	-0.5808697460295443	10	0.46948230566111393	0.803058722783633
SSU1	WT	0.9180068849961464	60	0.22386962387029927	0.7547519759247254
RSC2	WT	0	0	0	0
RSC2	WT	-0.38536898007813053	10	0.3974965872167526	0.4554646910308055
RSC2	WT	0.5150014940724127	60	0.2511969907797013	0.4488238364404055
FMP30	WT	0	0	0	0
FMP30	WT	0.097852219944211	10	0.7986115247739307	0.3835169272034313
FMP30	WT	-0.253749739718703	60	0.5146812574397372	0.389446014803107
YOR072W-B	WT	0	0	0	0
YOR072W-B	WT	0.452971555866033	10	0.7242737283585425	1.2841045663071817
YOR072W-B	WT	-0.6692464903215827	60	0.6273771773516101	1.3786906593995087
NAR1	WT	0	0	0	0
NAR1	WT	-2.3858075789275626	10	1.875370384952815e-11	0.3552735085043617
NAR1	WT	-0.29955606907216065	60	0.28303002634668156	0.27903642987441785
SDC1	WT	0	0	0	0
SDC1	WT	-0.07382344080161131	10	0.835657664260556	0.3558596696216395
SDC1	WT	0.17649339400345215	60	0.6099677585896992	0.34598442309881233
BEM1	WT	0	0	0	0
BEM1	WT	-0.5502821842447662	10	0.027078388364258316	0.24895298730120635
BEM1	WT	-0.41993031619562404	60	0.08340950068255024	0.2425608472272864
YKR018C	WT	0	0	0	0
YKR018C	WT	0.3718776288474328	10	0.047651498986413555	0.18777305210953013
YKR018C	WT	0.11468389571691748	60	0.5423832256184125	0.18824924066139348
ECM27	WT	0	0	0	0
ECM27	WT	0.442807270754783	10	0.5707756376416855	0.7810898109232561
ECM27	WT	-0.501288012318483	60	0.535459928096296	0.8089296086454518
PDR15	WT	0	0	0	0
PDR15	WT	1.8269634037211693	10	0.0420342604741425	0.8985740014125513
PDR15	WT	-1.006564168325744	60	0.26380077437459426	0.9007666159779669
PGM1	WT	0	0	0	0
PGM1	WT	0.019661733810825376	10	0.9341183903328479	0.2378500675176174
PGM1	WT	-0.038857347414419874	60	0.869944829010363	0.2373278438336946
OXA1	WT	0	0	0	0
OXA1	WT	-0.4906695228934779	10	0.2587847962777694	0.4345022824406567
OXA1	WT	0.08163430248244627	60	0.844887759639803	0.4172565370624134
PET100	WT	0	0	0	0
PET100	WT	0.6408861889653418	10	0.056984729876421364	0.3367010539007986
PET100	WT	0.6730368396046132	60	0.04368115857519767	0.3336593639485588
VPS41	WT	0	0	0	0
VPS41	WT	0.7754221680221333	10	0.1455818262413971	0.5328205147186084
VPS41	WT	-0.12412483159243841	60	0.8173034558633632	0.5373029626189503
SLX9	WT	0	0	0	0
SLX9	WT	-2.5414372331648813	10	2.3075109868505835e-9	0.42537843477671505
SLX9	WT	-0.5016621934346395	60	0.16941784516538738	0.3650903634201974
SCO1	WT	0	0	0	0
SCO1	WT	0.8495002556177828	10	0.006208039847566615	0.3104233922495156
SCO1	WT	1.022240923275905	60	8.418194164126371e-4	0.3061825147260464
PGM2	WT	0	0	0	0
PGM2	WT	8.380308701676501	10	2.2616513183450536e-87	0.42295229969728626
PGM2	WT	2.3386640887233887	60	5.6605959816479385e-8	0.43075635030152976
FEN2	WT	0	0	0	0
FEN2	WT	-0.49672839399750834	10	0.3725962542157142	0.5571072726563074
FEN2	WT	-0.6372778360440938	60	0.2526912492902149	0.5571404366557845
ZPS1	WT	0	0	0	0
ZPS1	WT	1.7085840307719975	10	0.13372912705150353	1.139392327031442
ZPS1	WT	1.199646972129721	60	0.30718776891522254	1.174810619254267
1	WT	0	0	0	0
1	WT	-1.4428126172294105	10	0.0027383423516842524	0.4816311959230462
1	WT	-0.29487144975348717	60	0.5250099063063036	0.4638956110687093
LNP1	WT	0	0	0	0
LNP1	WT	0.3305831620925102	10	0.6091046490592171	0.6464885402253272
LNP1	WT	0.23121315487617258	60	0.7199755185133007	0.6449613083522436
YFL015C	WT	0	0	0	0
YFL015C	WT	0.6750980066102852	10	0.4837130683089044	0.9639532638742818
YFL015C	WT	-0.5500161441908538	60	0.6053949032248996	1.0645651839343828
YER147C-A	WT	0	0	0	0
YER147C-A	WT	-0.9428136300859028	10	0.6747240858364038	2.246541502633978
YER147C-A	WT	0.12057384172573259	60	0.954857911625047	2.1300000845520874
YJL009W	WT	0	0	0	0
YJL009W	WT	-1.0940329385494663	10	0.5878024576759834	2.018424202154618
YJL009W	WT	2.283301373787736	60	0.1797742950824896	1.7021140255372127
YNL109W	WT	0	0	0	0
YNL109W	WT	-0.1573080733907482	10	0.9225254790257431	1.6175138277388892
YNL109W	WT	-4.108022219009106	60	0.04663166339532275	2.064716237090795
YLF2	WT	0	0	0	0
YLF2	WT	0.23494724287897878	10	0.6550237496457366	0.5258512948074143
YLF2	WT	0.29441827519824587	60	0.5692043233297679	0.5172276967499294
DCS2	WT	0	0	0	0
DCS2	WT	6.90775127260803	10	4.296489780183419e-53	0.4503841614666579
DCS2	WT	2.2745266009554106	60	2.9174419845860134e-6	0.4863686963665018
CUE5	WT	0	0	0	0
CUE5	WT	1.0545396259588564	10	2.862158355519114e-8	0.19001857438661707
CUE5	WT	0.25481432163052775	60	0.18730528012837036	0.19324716509247256
STE6	WT	0	0	0	0
STE6	WT	-0.401112880598361	10	0.49925089087755964	0.593653023544921
STE6	WT	-0.4541207644776867	60	0.44349246833551287	0.5926079014616947
CDC27	WT	0	0	0	0
CDC27	WT	0.49276031267071163	10	0.25048862951423395	0.4287991885019731
CDC27	WT	0.031043433053667267	60	0.9432978237864247	0.43645957908791766
EFB1	WT	0	0	0	0
EFB1	WT	-0.3455077395658155	10	0.11722287088740807	0.22055505972068293
EFB1	WT	-0.87158726431394	60	7.808739453611423e-5	0.22064408484254744
YLR140W	WT	0	0	0	0
YLR140W	WT	0.04206192462741007	10	0.9808773381722166	1.754847067922449
YLR140W	WT	1.1226067115850338	60	0.47785476870473126	1.5816772975189146
TDH2	WT	0	0	0	0
TDH2	WT	0.39715086964869933	10	0.059838836886956195	0.2110282967471532
TDH2	WT	-0.10754020074541933	60	0.6103659790793088	0.211048896775746
SBE22	WT	0	0	0	0
SBE22	WT	-0.14190810656988637	10	0.5574736863672696	0.24191710885101972
SBE22	WT	0.3001814510624509	60	0.19461572288847379	0.23143488764826872
YKL075C	WT	0	0	0	0
YKL075C	WT	0.0992983540121244	10	0.6876955898551563	0.24702048581802552
YKL075C	WT	-0.03813228349247359	60	0.8775735553200089	0.2475384731607383
RBH1	WT	0	0	0	0
RBH1	WT	-0.31126019314175585	10	0.3785747328436351	0.35349369929231733
RBH1	WT	0.14783110486438739	60	0.6580211807631113	0.33397074818706085
YIR017W-A	WT	0	0	0	0
YIR017W-A	WT	0.41997200930216944	10	0.7324861623363839	1.2286340497237578
YIR017W-A	WT	-1.5637027704824598	60	0.2986913523158441	1.5046543747175063
JJJ1	WT	0	0	0	0
JJJ1	WT	-1.9483325204051702	10	9.12373195431393e-7	0.3968370478692796
JJJ1	WT	0.08921968567390604	60	0.7899408744387392	0.3349245813742184
VPS70	WT	0	0	0	0
VPS70	WT	0.43555283393922417	10	0.3871067562087793	0.5036013791603577
VPS70	WT	-0.5894659299931518	60	0.26342118459272834	0.527089399196685
GTO3	WT	0	0	0	0
GTO3	WT	0.6938223851042404	10	0.447906777294787	0.9142361636910801
GTO3	WT	-0.20729036830859177	60	0.8340532239110638	0.9894243253712243
ATP18	WT	0	0	0	0
ATP18	WT	0.5043535265927724	10	0.10409271193779303	0.31030878749562124
ATP18	WT	-0.16691402448045042	60	0.5934408432721487	0.3126571185167231
YOR1	WT	0	0	0	0
YOR1	WT	0.15910647369914308	10	0.7437539537667244	0.48673351861105135
YOR1	WT	0.1230576578133119	60	0.8000882154410909	0.4859464929039185
ECM10	WT	0	0	0	0
ECM10	WT	1.6258721218138765	10	0.17014124327827568	1.1852538671488229
ECM10	WT	-1.5334028643768418	60	0.19743232318333903	1.1896974535410536
YML083C	WT	0	0	0	0
YML083C	WT	-0.2550860911874079	10	0.7912189089830668	0.9635775964217538
YML083C	WT	-1.3429755172216629	60	0.18173684949173433	1.0056530109712811
PHO92	WT	0	0	0	0
PHO92	WT	0.6415205961857067	10	0.367464444975907	0.7118254562022035
PHO92	WT	-0.01059020286100448	60	0.9883611912793349	0.7259728971237115
SKI6	WT	0	0	0	0
SKI6	WT	-1.3024104831905807	10	1.5405348127329793e-6	0.2710021604508284
SKI6	WT	-0.31743507316230446	60	0.19414738026079445	0.2444803341704075
INN1	WT	0	0	0	0
INN1	WT	-0.07317000503695956	10	0.8238982074200831	0.3288037089041403
INN1	WT	0.3677143706791846	60	0.23872142141669161	0.3121014469444738
SPC2	WT	0	0	0	0
SPC2	WT	0.08486302640123092	10	0.8179239436985928	0.36862352364433243
SPC2	WT	0.3314578879273841	60	0.3602095310246263	0.3622625577713675
FHL1	WT	0	0	0	0
FHL1	WT	-0.5757707178282611	10	0.027811145526187332	0.2617210892091544
FHL1	WT	0.26844069250170344	60	0.2625619369124376	0.23960295479729865
IPI1	WT	0	0	0	0
IPI1	WT	-3.557195411210975	10	7.951141659302856e-9	0.6165527481998331
IPI1	WT	-0.8855661841925538	60	0.03751302336639324	0.42572505458996807
EMW1	WT	0	0	0	0
EMW1	WT	-3.461087668551687	10	1.0640448159241514e-28	0.3113972338313922
EMW1	WT	-0.6789724488692069	60	0.0059086065698260495	0.24664698878201363
PTM1	WT	0	0	0	0
PTM1	WT	1.4515307809900275	10	0.0496637750701235	0.7395021812975636
PTM1	WT	0.37144787138120705	60	0.6185898799710892	0.7461042211923635
YAR075W	WT	0	0	0	0
YAR075W	WT	-1.114630873031844	10	0.030036797076812966	0.5137483427948499
YAR075W	WT	0.01173569887038827	60	0.9803523443161886	0.4765345373494056
MHF1	WT	0	0	0	0
MHF1	WT	0.13182842903282876	10	0.7504374773968578	0.41447325982642585
MHF1	WT	0.5631686880429788	60	0.15550294077871907	0.39649718475571843
RPS9A	WT	0	0	0	0
RPS9A	WT	-2.695809179760808	10	7.313622798116512e-16	0.33425338939892246
RPS9A	WT	-0.7632763799612391	60	0.020280044908620107	0.3288388404235315
ISR1	WT	0	0	0	0
ISR1	WT	-0.019242538377821715	10	0.9748400941650817	0.6101286506178979
ISR1	WT	0.146530370992015	60	0.8086935461334313	0.6052178357949228
MNN11	WT	0	0	0	0
MNN11	WT	-1.7869492513127287	10	0.002870673304134587	0.5993944736146177
MNN11	WT	-0.4299945436455817	60	0.44061558731945155	0.5575987142027433
SMI1	WT	0	0	0	0
SMI1	WT	0.31743998551828556	10	0.31036804891923025	0.31291829816969363
SMI1	WT	-0.2981208813104831	60	0.34318033831643247	0.31450666194071497
RIC1	WT	0	0	0	0
RIC1	WT	1.3481960964321833	10	0.0525829573249453	0.6955451331981438
RIC1	WT	0.4975552507081088	60	0.47518534131190976	0.6967900625073306
NOC2	WT	0	0	0	0
NOC2	WT	-3.3398566217875723	10	2.6351473288198886e-32	0.2822490807395893
NOC2	WT	-0.7070022202856439	60	0.0017482235509202549	0.22588125020007777
GAL83	WT	0	0	0	0
GAL83	WT	0.22878295688071965	10	0.21438348997038198	0.18426434564249883
GAL83	WT	-0.04174101034394018	60	0.8218329726159486	0.18536066761559342
MRPL39	WT	0	0	0	0
MRPL39	WT	-0.21292087230794265	10	0.46792263538939677	0.29333470955393176
MRPL39	WT	0.4233483960377139	60	0.1320360500001357	0.2810852018306857
DEP1	WT	0	0	0	0
DEP1	WT	0.21992497013387743	10	0.30063625027357355	0.21247353623862686
DEP1	WT	-0.06185680198526733	60	0.7733774798812884	0.21481051629229617
RPL8A	WT	0	0	0	0
RPL8A	WT	-1.4292834786105917	10	2.0762338560860677e-11	0.21330808730079498
RPL8A	WT	-1.0298930372398554	60	1.2863613592677185e-6	0.21270653353713573
FYV1	WT	0	0	0	0
FYV1	WT	0.9457019243313558	10	0.5226191480664109	1.479246477851521
FYV1	WT	1.646814028803849	60	0.25746622598664753	1.454268593967599
PRS3	WT	0	0	0	0
PRS3	WT	-2.615210434754427	10	1.0756247192741812e-23	0.26062332365244983
PRS3	WT	-0.5257515117830347	60	0.02754619547787169	0.23857786535109768
ESF2	WT	0	0	0	0
ESF2	WT	-2.2334409186624753	10	6.335900024707027e-14	0.2977545747563138
ESF2	WT	-0.01941241160616254	60	0.9349258888113778	0.2377546289777827
RPS25B	WT	0	0	0	0
RPS25B	WT	-0.8943817680767975	10	3.460159055348508e-8	0.16213144559237783
RPS25B	WT	-1.1332066737324946	60	2.843262732112797e-12	0.16222824364879446
YAR028W	WT	0	0	0	0
YAR028W	WT	0.21632795252945905	10	0.7392018087498747	0.6498080499742439
YAR028W	WT	0.05484232432962976	60	0.9328058077997741	0.6504439074435915
AVT1	WT	0	0	0	0
AVT1	WT	-0.15143461041772405	10	0.7157627854417665	0.4158834501683429
AVT1	WT	-0.14497167450133547	60	0.7257906801321299	0.41334229787396115
YMR122C	WT	0	0	0	0
YMR122C	WT	1.8897874938108712	10	0.3149782982790049	1.8807020733080453
YMR122C	WT	1.3055026636646205	60	0.5035676553548716	1.9517540998907934
YSH1	WT	0	0	0	0
YSH1	WT	-0.5725783875712154	10	0.6122520019411306	1.1296545291783247
YSH1	WT	-0.10754603042847133	60	0.923867754802185	1.1253955562936604
RIB2	WT	0	0	0	0
RIB2	WT	-0.13608136290156497	10	0.6098571927745422	0.26668119228118853
RIB2	WT	0.13941923951708493	60	0.5891939982792773	0.2581816733492201
TMA16	WT	0	0	0	0
TMA16	WT	-3.067142008344219	10	3.2736331234523957e-18	0.35248200474052843
TMA16	WT	-0.5029795416364975	60	0.03208481349909048	0.23466955106183904
COS2	WT	0	0	0	0
COS2	WT	1.7708633292241178	10	0.12891333382462997	1.1662685297322204
COS2	WT	-0.25048226647511573	60	0.8439318132657108	1.2723441876760673
SAC6	WT	0	0	0	0
SAC6	WT	1.1587587696521573	10	7.17508374891089e-9	0.2002426031702728
SAC6	WT	-0.11296865963087442	60	0.5759198023695733	0.20196254459621918
HBN1	WT	0	0	0	0
HBN1	WT	1.9980571439815589	10	2.225238258841094e-5	0.4711285182638376
HBN1	WT	1.568305706285421	60	9.014646618310471e-4	0.47243813690091807
TPM2	WT	0	0	0	0
TPM2	WT	0.7061801212198343	10	9.273339981764838e-4	0.21323843058269087
TPM2	WT	0.5654200113680693	60	0.007953350247064115	0.2130409495776616
HFM1	WT	0	0	0	0
HFM1	WT	0.5997611609755843	10	0.3445888993535867	0.6345758479240772
HFM1	WT	-0.2689214546134325	60	0.6798946625625892	0.6517619316494867
RAI1	WT	0	0	0	0
RAI1	WT	-1.4105079190112104	10	5.945662764681025e-7	0.2824985624199919
RAI1	WT	-0.5423222573780058	60	0.03338183651797994	0.2549153071849346
YGL262W	WT	0	0	0	0
YGL262W	WT	-2.923826758484747	10	0.20685689401888147	2.3163511299896045
YGL262W	WT	-0.12789591201665082	60	0.949198152797753	2.007351690196135
AIM23	WT	0	0	0	0
AIM23	WT	1.0286710826367689	10	0.012141999004264763	0.41015751554764757
AIM23	WT	0.22470702595030395	60	0.5963282935417974	0.4242252812253121
YER186C	WT	0	0	0	0
YER186C	WT	-0.26507349723502055	10	0.8201145422261534	1.165682624210243
YER186C	WT	0.514065624661917	60	0.6335653330783018	1.078350812798903
UTR4	WT	0	0	0	0
UTR4	WT	0.4090697445237514	10	0.11237691329206223	0.257665566133933
UTR4	WT	0.03127373804911628	60	0.9041406246019961	0.25967876887785385
MDS3	WT	0	0	0	0
MDS3	WT	-0.07954598856344658	10	0.7054439846670172	0.21044915879243925
MDS3	WT	-0.0074658865848433766	60	0.9712270997707385	0.20698727590393085
ARG81	WT	0	0	0	0
ARG81	WT	-0.37757531633109587	10	0.26650159764660775	0.33980433435531376
ARG81	WT	0.1886231351947973	60	0.5544756755414719	0.3191232205735515
NBL1	WT	0	0	0	0
NBL1	WT	0.46015170556671364	10	0.5097354506554683	0.6979930679925704
NBL1	WT	0.8401641497241836	60	0.20944522423236353	0.66940422810686
SNU114	WT	0	0	0	0
SNU114	WT	-0.5992922103051667	10	0.005698515781585764	0.21677021319804676
SNU114	WT	-0.40981568179341726	60	0.05093178156269396	0.20994073943366423
YPL044C	WT	0	0	0	0
YPL044C	WT	1.4194486413288616	10	0.46751670849170446	1.9537493582940628
YPL044C	WT	0.24971496364354523	60	0.9058265031775782	2.1107841201387156
WHI2	WT	0	0	0	0
WHI2	WT	-0.33138773895904344	10	0.14008870813983582	0.2245994919062529
WHI2	WT	-0.3949646865992622	60	0.07677570503227553	0.2231806400242773
YKL169C	WT	0	0	0	0
YKL169C	WT	0.3104660489959054	10	0.8355814973853375	1.4958720798461982
YKL169C	WT	-2.615449360659792	60	0.09771570902014881	1.5793488588478097
NFT1	WT	0	0	0	0
NFT1	WT	0.7446627724319108	10	0.3643067264653319	0.8208461143258367
NFT1	WT	-0.15626488193780383	60	0.8520717419700978	0.8379906405408243
RPL6B	WT	0	0	0	0
RPL6B	WT	-1.640108281241224	10	8.514950322200428e-15	0.2113631015440067
RPL6B	WT	-0.9464380098219968	60	6.797359298741302e-6	0.2103225005173777
YNL235C	WT	0	0	0	0
YNL235C	WT	0.7716000645407832	10	0.6588297783576805	1.7475621221905184
YNL235C	WT	-1.3817134978505787	60	0.48277719648337997	1.9686936651296199
IKI3	WT	0	0	0	0
IKI3	WT	-1.9841695663768892	10	1.0945628893983897e-30	0.17229529968074828
IKI3	WT	-0.7976682838433624	60	5.032033699087108e-7	0.15873719670749944
GAT2	WT	0	0	0	0
GAT2	WT	1.4283408958571697	10	9.554891283595108e-4	0.4323961826622985
GAT2	WT	-0.2089275166043098	60	0.6461162658459659	0.45501701210239176
VHT1	WT	0	0	0	0
VHT1	WT	-0.8436681505161949	10	0.07507086038928815	0.4739625725357751
VHT1	WT	-0.7935896559601315	60	0.08901431167104588	0.46664717618931056
SMD1	WT	0	0	0	0
SMD1	WT	-1.1089793220101736	10	0.0018168636283429449	0.35559682792816877
SMD1	WT	-0.36065697136061214	60	0.28325590570966663	0.3361095776255195
MNN2	WT	0	0	0	0
MNN2	WT	-0.42455077307244204	10	0.5080838887132957	0.6414857100496961
MNN2	WT	-0.05524022264035635	60	0.9306416992598785	0.6346714743733483
EGD2	WT	0	0	0	0
EGD2	WT	-0.35812674044529774	10	0.03612927821673492	0.17090525193305525
EGD2	WT	-0.6141500023627785	60	3.283415201227179e-4	0.17098441401672695
CPR1	WT	0	0	0	0
CPR1	WT	0.388482214077679	10	0.0049642548018383114	0.13828217306839607
CPR1	WT	0.15339850884439504	60	0.2673607856955557	0.13830140577976854
ADH6	WT	0	0	0	0
ADH6	WT	-0.49240968057907625	10	0.00215938633278519	0.16053063391898004
ADH6	WT	-0.2638374557975439	60	0.09730969914508869	0.1591262558086656
LYP1	WT	0	0	0	0
LYP1	WT	0.4153069840526226	10	0.5378545453983197	0.6741333647983886
LYP1	WT	-0.39006287293851305	60	0.5651459800797884	0.6781167978804293
ECM11	WT	0	0	0	0
ECM11	WT	-1.213157432016726	10	0.24360382574678743	1.0404203290821488
ECM11	WT	-1.279571189577714	60	0.21567502074774586	1.0334869088842136
DNF2	WT	0	0	0	0
DNF2	WT	-0.5101032232175334	10	0.2012231517786807	0.39911852938241693
DNF2	WT	-0.15339337907608988	60	0.6937817150153949	0.38959205092977667
YLR236C	WT	0	0	0	0
YLR236C	WT	1.212407979560785	10	0.38963743149149294	1.409325948187982
YLR236C	WT	-0.7090942280629347	60	0.6173379405271406	1.419248012587746
CIN10	WT	0	0	0	0
CIN10	WT	-0.07735965816348665	10	0.905025915593856	0.6483656931426925
CIN10	WT	-0.6069212259206102	60	0.36266650635953923	0.6667296414146403
TAF2	WT	0	0	0	0
TAF2	WT	-0.48486370436490944	10	0.03525119788275093	0.2302886171330193
TAF2	WT	-0.23446576072104738	60	0.29711399249211	0.22487651007961165
FIR1	WT	0	0	0	0
FIR1	WT	0.01958193115711586	10	0.9537142944076629	0.33736877993103304
FIR1	WT	0.4560928191425309	60	0.15914761511267023	0.32394241382621725
RPL24A	WT	0	0	0	0
RPL24A	WT	-1.5508851761590325	10	5.154111201979023e-14	0.2060167944508403
RPL24A	WT	-1.4365997907980037	60	2.813612486906679e-12	0.20561825109234733
CTF13	WT	0	0	0	0
CTF13	WT	-0.14003131582637007	10	0.7955796299902966	0.5405110357490774
CTF13	WT	0.15298365924780394	60	0.769531199568819	0.5221496246397354
YDL144C	WT	0	0	0	0
YDL144C	WT	0.031155084591976467	10	0.8778631463760955	0.20272882064012476
YDL144C	WT	0.3066807745086147	60	0.11934516844677599	0.19690224927679975
SAP4	WT	0	0	0	0
SAP4	WT	0.5376089058919328	10	0.1951770240692622	0.41500894073126593
SAP4	WT	0.13638287708061644	60	0.7481382652889389	0.4247428392817827
PSF1	WT	0	0	0	0
PSF1	WT	-0.11655760968991426	10	0.7683296525403971	0.3957000887146385
PSF1	WT	0.5648413279071407	60	0.124405889157037	0.3676058994582206
CTP1	WT	0	0	0	0
CTP1	WT	-1.139385887539958	10	0.028985450030681342	0.5217722441863837
CTP1	WT	0.32237524326439704	60	0.4877643070131635	0.4646052778597723
JJJ3	WT	0	0	0	0
JJJ3	WT	-2.035932251331883	10	8.293593449938966e-6	0.45674702089027663
JJJ3	WT	0.2317758635625758	60	0.4831100709153354	0.33049026333690623
YER165C-A	WT	0	0	0	0
YER165C-A	WT	-2.138063789013659	10	0.3418135776800703	2.249201395067115
YER165C-A	WT	-0.15560708053409647	60	0.9397633649964761	2.059185810774197
6	WT	0	0	0	0
6	WT	-0.7312946218034067	10	0.00197893650101165	0.23640668626762876
6	WT	-0.5026679676026915	60	0.028179283037517277	0.2290287177615858
YMR244W	WT	0	0	0	0
YMR244W	WT	-0.5582980322735086	10	0.611893480991982	1.100371103900628
YMR244W	WT	-0.6876043977759027	60	0.5326049672496116	1.101869309355817
ADE17	WT	0	0	0	0
ADE17	WT	-1.4084225216339235	10	4.223709148426615e-5	0.3439464568766997
ADE17	WT	0.8817919689522207	60	0.007584652793620362	0.33025658044731165
RPL42A	WT	0	0	0	0
RPL42A	WT	-2.239421039399236	10	2.9578375210917606e-29	0.1994425649286422
RPL42A	WT	-0.7694777274215687	60	8.737085010446059e-5	0.19613389110722262
VAM3	WT	0	0	0	0
VAM3	WT	-0.31945223547307094	10	0.5136687412061077	0.4891053907132262
VAM3	WT	-0.27979236393767737	60	0.5616705969595612	0.4820998192264677
IES2	WT	0	0	0	0
IES2	WT	-0.16641497975681827	10	0.4263729423507017	0.20921816837994248
IES2	WT	0.14766875542746274	60	0.4658667901774682	0.2025021984453215
NRD1	WT	0	0	0	0
NRD1	WT	-1.1113180617838654	10	1.2129055881241607e-5	0.2540007476662857
NRD1	WT	-0.4734391900631237	60	0.05108874156160843	0.24269802122888093
MBP1	WT	0	0	0	0
MBP1	WT	0.12072199873006843	10	0.7229153121154439	0.3404789335547173
MBP1	WT	0.11886898316377553	60	0.7247664024849574	0.3376040729225361
MTQ1	WT	0	0	0	0
MTQ1	WT	1.0473403423639969	10	0.05005333652685851	0.5344915151975878
MTQ1	WT	1.4779378752960148	60	0.004363965480582486	0.5184692913153501
YOL163W	WT	0	0	0	0
YOL163W	WT	-1.7154975931030454	10	0.49073956593586776	2.489356274733115
YOL163W	WT	-1.600492754039142	60	0.5215994053074557	2.497328620708663
FUS2	WT	0	0	0	0
FUS2	WT	-0.5491194884389639	10	0.4716743171545839	0.7629229140471372
FUS2	WT	-0.9890245936426042	60	0.21305265612653632	0.7942599738658868
OSH7	WT	0	0	0	0
OSH7	WT	0.5428447697769038	10	0.019821923245482185	0.2330104203667321
OSH7	WT	-1.66662203748377e-4	60	0.9994376882659209	0.23648303987505326
UBP13	WT	0	0	0	0
UBP13	WT	0.15353799881538435	10	0.7917161942765526	0.5814012006295303
UBP13	WT	-0.3301077076796579	60	0.5715348036823349	0.5834429968364857
PET112	WT	0	0	0	0
PET112	WT	0.6793849854587914	10	0.11309462279633496	0.42878674239825953
PET112	WT	0.5883015358823224	60	0.168740268976738	0.42746306376229587
UTR2	WT	0	0	0	0
UTR2	WT	-1.2737983040253311	10	0.04754739822805077	0.6428807092173427
UTR2	WT	-1.0761986548643312	60	0.09263783809164344	0.6399680749819974
YPR096C	WT	0	0	0	0
YPR096C	WT	-1.0600664166156535	10	0.5166096290312785	1.634441034864443
YPR096C	WT	0.16622338146204244	60	0.908146944756618	1.440707748656177
VTS1	WT	0	0	0	0
VTS1	WT	-2.159913668040466	10	2.6255161892521873e-8	0.3881431558365655
VTS1	WT	-0.7294605505583815	60	0.02520656717820867	0.3259106907362334
FAA4	WT	0	0	0	0
FAA4	WT	-1.181328831172288	10	4.3203056641180215e-6	0.2570706713613664
FAA4	WT	-0.4717626358784334	60	0.06402716883538484	0.2547327340448403
FMP46	WT	0	0	0	0
FMP46	WT	1.8019018295648164	10	2.4895752968071013e-6	0.3826521271362078
FMP46	WT	1.3558964906451456	60	4.51414808734799e-4	0.3865107130184264
GLO3	WT	0	0	0	0
GLO3	WT	-0.9007396698971131	10	1.5333982652557523e-7	0.17161838421490616
GLO3	WT	0.023466152789565865	60	0.8840858073040521	0.16095668341825453
YCR018C-A	WT	0	0	0	0
YCR018C-A	WT	-0.5275683662494597	10	0.7935460408744716	2.0158610998363335
YCR018C-A	WT	1.2100434329772354	60	0.4954581531323711	1.7751594418794352
CSM1	WT	0	0	0	0
CSM1	WT	-0.38137112261073497	10	0.27435780922245145	0.34889526245441094
CSM1	WT	0.5754937619825864	60	0.07455855412538845	0.3227362522023839
TRI1	WT	0	0	0	0
TRI1	WT	0.030638219190422634	10	0.93469378972771755	0.3739067614188437
TRI1	WT	-0.43652577737813947	60	0.2587307600820513	0.38651254557943104
MEO1	WT	0	0	0	0
MEO1	WT	1.2240307348094313	10	5.356849156365273e-6	0.26899977725972746
MEO1	WT	0.4919982867678524	60	0.06916652471440221	0.270725820469279
CAN1	WT	0	0	0	0
CAN1	WT	0.015000170785828788	10	0.9774702621031766	0.531156379275817
CAN1	WT	-0.21131655945244995	60	0.6912726126296205	0.5321111258504643
YNR021W	WT	0	0	0	0
YNR021W	WT	0.26362876881532427	10	0.699161585254136	0.6821764082986024
YNR021W	WT	-0.5076020118287322	60	0.46004008888158804	0.6870806404641407
YHL018W	WT	0	0	0	0
YHL018W	WT	0.8664546472213964	10	0.11871277981864438	0.5553486794324614
YHL018W	WT	0.3099381674324788	60	0.592745584121186	0.5794736149965867
HO	WT	0	0	0	0
HO	WT	-5.478448623799895	10	1.0325172758154753e-27	0.5021490908098968
HO	WT	-1.314859486380563	60	6.334587058912184e-5	0.3287159114455005
OCA2	WT	0	0	0	0
OCA2	WT	-0.5714486220241014	10	0.057740914706749295	0.30113333781772356
OCA2	WT	0.16820062092250843	60	0.5438768645106468	0.2771193704370411
CHA4	WT	0	0	0	0
CHA4	WT	0.7145415979987708	10	0.14939568738503015	0.4956348841777727
CHA4	WT	0.07352398344600003	60	0.8844668588010047	0.5059834639518282
IDP1	WT	0	0	0	0
IDP1	WT	-2.1298686301229894	10	1.807020520915502e-15	0.26777599640039595
IDP1	WT	-0.6949150602539231	60	0.006675253509162915	0.2561780481472492
1	WT	0	0	0	0
1	WT	0.9983233360308685	10	4.7204439501117093e-7	0.19818460115642797
1	WT	-0.13511119914921338	60	0.5187459798663346	0.20938394663606574
YKR040C	WT	0	0	0	0
YKR040C	WT	0.7001702277017792	10	0.7043511779978824	1.8452072542416307
YKR040C	WT	0.46153056114986873	60	0.8034191600575873	1.8540983517411445
MTC4	WT	0	0	0	0
MTC4	WT	-0.29664526583160483	10	0.5920591706649677	0.553593022652967
MTC4	WT	-0.18471439397910533	60	0.7354160893000302	0.546605814033369
REC8	WT	0	0	0	0
REC8	WT	0.9812671994875213	10	0.2353154690710614	0.8268334649427732
REC8	WT	-0.11352481233829924	60	0.895503635829199	0.8643356646570487
YDR327W	WT	0	0	0	0
YDR327W	WT	0.2861122756680002	10	0.874122096628089	1.8059819541818374
YDR327W	WT	-0.8706991991262408	60	0.6595054315683756	1.976184565106606
GPI14	WT	0	0	0	0
GPI14	WT	0.5817820358729918	10	0.4981309373540302	0.8588031438807411
GPI14	WT	0.5398285914734753	60	0.5280522688769337	0.8555371766140978
HOT1	WT	0	0	0	0
HOT1	WT	-0.2764185362500591	10	0.6218126621678725	0.5603650540982728
HOT1	WT	-0.5860313294114424	60	0.29665892225132395	0.5615343922210503
YNL034W	WT	0	0	0	0
YNL034W	WT	0.32592037097967974	10	0.7667107549338552	1.0985582661324145
YNL034W	WT	-1.5921323704126087	60	0.18306678409558905	1.1958587849126454
NTE1	WT	0	0	0	0
NTE1	WT	1.9320640230197512	10	0.16980147345733976	1.4073462463383875
NTE1	WT	-1.0886223145995753	60	0.4396249504160992	1.4086241023372843
EXO1	WT	0	0	0	0
EXO1	WT	-0.10803963674903362	10	0.7681831618645968	0.3665439179984719
EXO1	WT	0.2860393266883387	60	0.4176971658309971	0.3529506999398761
RKM1	WT	0	0	0	0
RKM1	WT	-0.2028907205743554	10	0.3958811075816239	0.23897602032048573
RKM1	WT	0.05263663708167938	60	0.8196545028273653	0.23087320520534016
MSI1	WT	0	0	0	0
MSI1	WT	-1.0019516775728277	10	0.005046965276287559	0.357326766642445
MSI1	WT	0.18761364745980041	60	0.5393979633264132	0.3056972795041892
PDR10	WT	0	0	0	0
PDR10	WT	0.8717648519523162	10	0.12245047905013424	0.5644064382833629
PDR10	WT	0.05650702445638577	60	0.923183393326938	0.586023199544086
POM33	WT	0	0	0	0
POM33	WT	1.1538295132830767	10	0.12513339483769798	0.7523772377677441
POM33	WT	-0.10017931610740817	60	0.895713814492256	0.7642740890166021
YAL016C-A	WT	0	0	0	0
YAL016C-A	WT	-2.332519951496705	10	0.4698068468474429	3.227091002572696
YAL016C-A	WT	-3.6988442203492093	60	0.26387567248352245	3.3105867284546933
FAP1	WT	0	0	0	0
FAP1	WT	-2.124942307382062	10	2.427309901852647e-6	0.45075905019412515
FAP1	WT	-0.018658536912925995	60	0.9622486527646497	0.3942058432066148
MSO1	WT	0	0	0	0
MSO1	WT	0.7677670857554607	10	0.023906697408225274	0.3399267054095457
MSO1	WT	0.724813793807884	60	0.031869312635250266	0.33774383667726066
IPT1	WT	0	0	0	0
IPT1	WT	-0.857321322247143	10	0.30602683827935895	0.8375595139578629
IPT1	WT	-1.010776874307163	60	0.22760454752698017	0.8377396876671696
EFT1	WT	0	0	0	0
EFT1	WT	-1.9900415957257291	10	3.511545341843525e-7	0.3906873559426791
EFT1	WT	-0.8619913637103351	60	0.027225822157242088	0.3903478324709602
YIL029C	WT	0	0	0	0
YIL029C	WT	1.211691656137029	10	0.2953792782542853	1.1579691286195408
YIL029C	WT	-1.447845560153073	60	0.22819526761874423	1.2015108333746274
NDD1	WT	0	0	0	0
NDD1	WT	0.037586440671251185	10	0.9075354160593271	0.3236087527366044
NDD1	WT	0.44947432764659245	60	0.1502630611440192	0.3124380774070087
IPL1	WT	0	0	0	0
IPL1	WT	0.3041076365237828	10	0.4542591749031591	0.40637996159270995
IPL1	WT	0.1411706238338065	60	0.7287530482556761	0.40708431136912876
YJR124C	WT	0	0	0	0
YJR124C	WT	-0.7648633143369822	10	0.1852853729022058	0.5774053702232476
YJR124C	WT	-1.6522951501827123	60	0.009414423399938152	0.6363237660739869
KEI1	WT	0	0	0	0
KEI1	WT	0.33218740022775073	10	0.5666389116270012	0.5797250424746015
KEI1	WT	0.054135133196567355	60	0.9262842678709879	0.5851131260241382
PSK1	WT	0	0	0	0
PSK1	WT	1.6348390841477785	10	5.176142359029296e-19	0.18351600966990897
PSK1	WT	0.4294372795180809	60	0.027580904953129984	0.1949155638055197
PMA2	WT	0	0	0	0
PMA2	WT	0.2961381896860185	10	0.6511408661878328	0.654915299110701
PMA2	WT	0.4227148762371967	60	0.5178556036479667	0.6536951388616946
SUP35	WT	0	0	0	0
SUP35	WT	-1.9404485905482334	10	2.039264820966718e-15	0.24442181105650412
SUP35	WT	-0.5243117748275736	60	0.027941651620388305	0.2385290358246428
OSH2	WT	0	0	0	0
OSH2	WT	1.2070689485981319	10	3.7925625012622157e-6	0.26113253618192267
OSH2	WT	0.1708825746571681	60	0.5210594115611848	0.26629119120162825
OCA6	WT	0	0	0	0
OCA6	WT	0.9475821050968141	10	0.004896451673009031	0.33676622469777223
OCA6	WT	0.20838631185890966	60	0.5554975509384009	0.35347135386060186
MSB3	WT	0	0	0	0
MSB3	WT	0.02104910578271367	10	0.9422879836225166	0.2907557038340109
MSB3	WT	-0.00523189429082273	60	0.9855134905089064	0.28814520978966845
GON7	WT	0	0	0	0
GON7	WT	-0.9356653093103444	10	0.004178429229091573	0.3266568653830906
GON7	WT	0.41841855028537944	60	0.1601049128971411	0.2978664129064962
UMP1	WT	0	0	0	0
UMP1	WT	0.44703108587708934	10	0.017289734871726116	0.1877897005760092
UMP1	WT	-0.3090720081014111	60	0.11057121783183893	0.19369893273695532
CHL1	WT	0	0	0	0
CHL1	WT	-0.0998966953633207	10	0.8784590134049636	0.6532484207063476
CHL1	WT	-0.9953787305523586	60	0.13342651576626016	0.6632649204509047
RMR1	WT	0	0	0	0
RMR1	WT	1.7224482375666774	10	5.360763697285566e-5	0.42642092414105925
RMR1	WT	0.8113024272205795	60	0.06477021095405906	0.439292011365418
CST26	WT	0	0	0	0
CST26	WT	-0.4537391115675056	10	0.49284996111085433	0.66163657430844
CST26	WT	-0.4280675373905621	60	0.5136143303178091	0.6553188929180892
YBR085C-A	WT	0	0	0	0
YBR085C-A	WT	5.137202315497522	10	1.5842973465668477e-41	0.3805606022261935
YBR085C-A	WT	1.897958261677331	60	7.231459918759097e-7	0.38303574252714806
TGL5	WT	0	0	0	0
TGL5	WT	0.9600155127912754	10	5.836245099023773e-5	0.23884929540893943
TGL5	WT	0.6125194141702567	60	0.0117089297016977	0.24298638639609155
YMC2	WT	0	0	0	0
YMC2	WT	-4.282025922195164	10	7.788386088385135e-17	0.5137765686009684
YMC2	WT	-0.6561395730235522	60	0.022937903355718103	0.28848054442616045
NEL1	WT	0	0	0	0
NEL1	WT	0.8846700023813451	10	0.09815050041307573	0.534903575985155
NEL1	WT	0.35476784514865867	60	0.5176101118743996	0.5482988401744292
YJL043W	WT	0	0	0	0
YJL043W	WT	0.33595424006597474	10	0.8032255742241277	1.3482673404285894
YJL043W	WT	1.7533325117154144	60	0.16513134979211605	1.2631908396061924
FDC1	WT	0	0	0	0
FDC1	WT	0.4801488594572502	10	0.1764658425679561	0.35521402407579583
FDC1	WT	0.9444096111130453	60	0.007284241553110287	0.3519238710026164
YPT52	WT	0	0	0	0
YPT52	WT	1.0475700843251703	10	8.770741957005778e-7	0.2130339259713375
YPT52	WT	0.022099828687808496	60	0.9186837191129984	0.2164699221088925
MGR1	WT	0	0	0	0
MGR1	WT	1.107976227422834	10	6.701239617706314e-4	0.3257298075343566
MGR1	WT	0.428264463874041	60	0.1980045612657422	0.3326952634681252
GPI10	WT	0	0	0	0
GPI10	WT	-0.3821366994135297	10	0.5222288299109276	0.5971692942326796
GPI10	WT	-0.725446585197388	60	0.2313657424470586	0.6061308431990562
DOT5	WT	0	0	0	0
DOT5	WT	1.0309395717048249	10	0.009788048445683725	0.3990895846269536
DOT5	WT	0.601772163817073	60	0.13279227581788489	0.4003323676421752
APL4	WT	0	0	0	0
APL4	WT	-0.0808541420974247	10	0.7452040119903942	0.2488051800163156
APL4	WT	-0.1875117666319035	60	0.44994402019808105	0.2481928426200379
YBR121C-A	WT	0	0	0	0
YBR121C-A	WT	-0.9793461015124719	10	1.100227811188023e-4	0.2532341674379967
YBR121C-A	WT	-0.9867986734288446	60	8.307215192163346e-5	0.25075183118824496
YPR071W	WT	0	0	0	0
YPR071W	WT	0.7427153232476315	10	0.3929441993410356	0.869394612525432
YPR071W	WT	0.2422119832828759	60	0.781147863414165	0.8718196903635872
YFR006W	WT	0	0	0	0
YFR006W	WT	0.600364734385195	10	7.602447175686582e-4	0.17831499598421227
YFR006W	WT	0.1751217764520595	60	0.3308331518294636	0.1800854572284951
YPL222C-A	WT	0	0	0	0
YPL222C-A	WT	1.1094722703907987	10	0.5844384633275342	2.028608115296077
YPL222C-A	WT	0.36557582813661704	60	0.8595980158762926	2.0667324681261876
APE4	WT	0	0	0	0
APE4	WT	0.44982593026772605	10	0.030837003066858874	0.20833282728750283
APE4	WT	0.20293670719287626	60	0.33191681128857425	0.20915699474803348
BSC1	WT	0	0	0	0
BSC1	WT	-0.11528665540138171	10	0.9327830835377056	1.3668656839327944
BSC1	WT	-2.6178066572480505	60	0.16379074353844886	1.8800208649760184
YLR446W	WT	0	0	0	0
YLR446W	WT	2.2495700897155118	10	1.432525154111071e-7	0.4275913860470589
YLR446W	WT	1.495116443895843	60	6.710422314968516e-4	0.4395920912427859
YMR119W-A	WT	0	0	0	0
YMR119W-A	WT	-0.75042488339703	10	0.47826027159274115	1.0582727602327444
YMR119W-A	WT	-0.8582508420784453	60	0.41773413537258114	1.0591001300025145
YPT31	WT	0	0	0	0
YPT31	WT	-0.9720872841892517	10	1.4392345215074124e-6	0.2016990729344869
YPT31	WT	-0.1099250064915269	60	0.566689013858571	0.19186311516001098
EPO1	WT	0	0	0	0
EPO1	WT	0.7462266188669694	10	9.985638110903403e-4	0.22675243109260126
EPO1	WT	-0.0520921574402039	60	0.8262856694559688	0.23735673400454027
DXO1	WT	0	0	0	0
DXO1	WT	-1.3467800070486617	10	0.011108454068829215	0.5303810989172516
DXO1	WT	-0.08654719532358464	60	0.8478185971398923	0.4509957175965477
HBT1	WT	0	0	0	0
HBT1	WT	3.388063880592995	10	2.6820974100476056e-19	0.3772461096530623
HBT1	WT	1.443462348686725	60	2.4324412548579509e-4	0.3933922473457809
THI7	WT	0	0	0	0
THI7	WT	-0.5153882137140133	10	0.4523735374692062	0.685845634217201
THI7	WT	-0.336777866487874	60	0.61779635671552	0.6749381307859643
DBF20	WT	0	0	0	0
DBF20	WT	-0.18059065627076643	10	0.5943147771640611	0.3390776377592778
DBF20	WT	-0.22639626971306476	60	0.5009680803333585	0.33641495235265323
DMA1	WT	0	0	0	0
DMA1	WT	-0.10773010653391958	10	0.7112585862297518	0.29103164484369176
DMA1	WT	-0.013563854528370705	60	0.9623223536166725	0.2871295674236176
APM4	WT	0	0	0	0
APM4	WT	-0.6661992777466177	10	0.0398590125523977	0.32415190707727276
APM4	WT	-0.35978905789242166	60	0.2536059882404863	0.3151525870921387
ISU1	WT	0	0	0	0
ISU1	WT	0.4932916627131403	10	0.016428517675711962	0.20560210701261522
ISU1	WT	-0.07286107861536799	60	0.7257022835504363	0.2076712726427913
SSN2	WT	0	0	0	0
SSN2	WT	-0.1251459762513348	10	0.661864407842184	0.28615225053670135
SSN2	WT	0.2208106866285414	60	0.4198019814805472	0.2736989474394764
RSM24	WT	0	0	0	0
RSM24	WT	-0.41397705079103064	10	0.17292741967498348	0.30375666233657506
RSM24	WT	-0.17195741807778972	60	0.5620856550127643	0.29660800160878564
ADE3	WT	0	0	0	0
ADE3	WT	-1.1182805090960761	10	5.305535719122979e-12	0.1621365583606513
ADE3	WT	-0.27000057960785584	60	0.09056379031642327	0.15953415523494732
PET117	WT	0	0	0	0
PET117	WT	1.3323387461500886	10	1.0107386255898073e-4	0.34267976859041677
PET117	WT	1.3277819399698159	60	9.45874069573618e-5	0.3401017588475121
YOR342C	WT	0	0	0	0
YOR342C	WT	-2.3157407262167404	10	4.5103009653328996e-8	0.4233832491183334
YOR342C	WT	-0.5443766874428081	60	0.09392446444762577	0.32499134826633747
FIT3	WT	0	0	0	0
FIT3	WT	0.8868301426391593	10	0.130484730909535	0.5864529524570014
FIT3	WT	-0.9614920180317112	60	0.10153359807902967	0.5871836809429821
NOC3	WT	0	0	0	0
NOC3	WT	-2.882005139172347	10	8.379961167659207e-25	0.280260466975206
NOC3	WT	-0.25826305341426087	60	0.1898317888010553	0.19698543699953794
YJR087W	WT	0	0	0	0
YJR087W	WT	1.8758728056630325	10	0.30608785836322144	1.8328639479727176
YJR087W	WT	0.22295694132911312	60	0.9168543316595565	2.135664986324116
MID1	WT	0	0	0	0
MID1	WT	-0.5633487665201634	10	0.4719801066664001	0.7832327188780539
MID1	WT	-0.06703393258339453	60	0.9287312301834986	0.7494743352187325
SWC4	WT	0	0	0	0
SWC4	WT	1.0187883044827284	10	0.017110035220593282	0.4272841084034405
SWC4	WT	-0.028254789468327924	60	0.9483417484720845	0.43610260727481476
YIL156W-A	WT	0	0	0	0
YIL156W-A	WT	-0.0837778694413342	10	0.9209879310816788	0.8446256571371308
YIL156W-A	WT	-0.3336768348819256	60	0.6983378548512618	0.8609567325673781
RMI1	WT	0	0	0	0
RMI1	WT	-7.543073975516551e-4	10	0.9987780838249597	0.4925460548309488
RMI1	WT	0.970619673152634	60	0.03269133862582393	0.4544410803163122
PSY4	WT	0	0	0	0
PSY4	WT	-0.26476277044576807	10	0.3165354817322686	0.2643390951895275
PSY4	WT	-0.3198991734665412	60	0.22291534758483542	0.26246790274138243
YHR073W-A	WT	0	0	0	0
YHR073W-A	WT	-1.3375992352057067	10	0.10807858065772603	0.8324151245673914
YHR073W-A	WT	-0.8667513087300881	60	0.2528399010140213	0.7579951622515331
YET1	WT	0	0	0	0
YET1	WT	1.8039644676386686	10	0.0019435897280693103	0.582164503425554
YET1	WT	0.5621224277133418	60	0.34274303740719864	0.5924815887325567
MRPL50	WT	0	0	0	0
MRPL50	WT	-0.378157328787443	10	0.29088919943114017	0.35804488567200965
MRPL50	WT	0.4959214610555081	60	0.14370958679285842	0.3391807909972819
ATX2	WT	0	0	0	0
ATX2	WT	-0.2678144730783335	10	0.6911915897135652	0.6741906164928975
ATX2	WT	0.053809372897515625	60	0.9339681877862557	0.6494535899770075
YBP1	WT	0	0	0	0
YBP1	WT	0.7382772389186034	10	0.006841459661948893	0.2729846376696346
YBP1	WT	0.195941132477273	60	0.4807592749844328	0.2778984041451238
PPR1	WT	0	0	0	0
PPR1	WT	-0.4020507812895513	10	0.5221529759727055	0.6281747191066495
PPR1	WT	-0.17604438582555187	60	0.7754519659278598	0.6171563956258838
MSG5	WT	0	0	0	0
MSG5	WT	-2.110921972657448	10	7.784046731688367e-6	0.4721323007321525
MSG5	WT	-0.1655234298146443	60	0.6519616755187321	0.36698278715290195
PET54	WT	0	0	0	0
PET54	WT	1.109788470096523	10	5.735193515334244e-4	0.32225339530882424
PET54	WT	0.7806646758851118	60	0.017276242091424962	0.32790353836923775
NOP10	WT	0	0	0	0
NOP10	WT	-2.0780740575226075	10	4.8224903795992e-20	0.22666808124233018
NOP10	WT	-0.5399606304169731	60	0.008409086203434465	0.20490407883121378
YNL198C	WT	0	0	0	0
YNL198C	WT	-0.8064691672990874	10	0.4274343276180631	1.0162293714439083
YNL198C	WT	-2.400729768545648	60	0.067093174902731	1.3111223604839155
YPR015C	WT	0	0	0	0
YPR015C	WT	0.6620487130820891	10	0.4017515717176308	0.7895658880687644
YPR015C	WT	-1.3082994687738798	60	0.13492187964162333	0.8751333832167868
PHO91	WT	0	0	0	0
PHO91	WT	0.3461032096983567	10	0.5166998854757987	0.5337468077216853
PHO91	WT	-0.1546983150556968	60	0.7736402434058116	0.537862973915387
YGR125W	WT	0	0	0	0
YGR125W	WT	0.968594469086545	10	0.0402740962275136	0.4722716423298256
YGR125W	WT	-0.11200083223072614	60	0.8191703911644402	0.48991638928968656
SPE3	WT	0	0	0	0
SPE3	WT	-0.050772884435035574	10	0.7342804327841357	0.14957963124288656
SPE3	WT	-0.7280143207699341	60	1.3757895471164957e-6	0.1507750427577574
ECO1	WT	0	0	0	0
ECO1	WT	0.23855851719220267	10	0.5455239853974159	0.3946502360759274
ECO1	WT	0.47394917423794614	60	0.2157569507300426	0.3828686534821744
TFC6	WT	0	0	0	0
TFC6	WT	0.22349131031544514	10	0.4658890898297981	0.30649506388835013
TFC6	WT	0.0322459954158116	60	0.9164360523169586	0.3073269338080728
AQY3	WT	0	0	0	0
AQY3	WT	0.8973226291064234	10	0.13060042766621158	0.5935700473888039
AQY3	WT	-0.6923895288841412	60	0.26489673118724694	0.6210373438553262
YBR201C-A	WT	0	0	0	0
YBR201C-A	WT	1.2256117119898926	10	0.2098068913725179	0.9772865179990315
YBR201C-A	WT	0.12932959820144688	60	0.9029951397056056	1.0611343227307113
BUD6	WT	0	0	0	0
BUD6	WT	-0.276304366281858	10	0.310247598307221	0.27230082696064845
BUD6	WT	-0.19120352610865896	60	0.47545706444275365	0.26793154217853465
CWH43	WT	0	0	0	0
CWH43	WT	-0.3231843037859968	10	0.6518186404769186	0.7162183056921037
CWH43	WT	-0.7860192022403206	60	0.2756231952761896	0.7209834529283832
MUS81	WT	0	0	0	0
MUS81	WT	0.22330239462131796	10	0.5615008572045628	0.38459720509334056
MUS81	WT	-0.0779770850754341	60	0.8414918813990325	0.38991359445831014
EHT1	WT	0	0	0	0
EHT1	WT	1.7935441272870183	10	2.3214580244316e-28	0.1623873158651856
EHT1	WT	0.645825797239287	60	1.291178258294918e-4	0.16870506466050877
VAC8	WT	0	0	0	0
VAC8	WT	0.016595368859872315	10	0.9859513616512692	0.9424759935093375
VAC8	WT	-0.21375051395310302	60	0.8205809568779657	0.9424716316507127
MIA40	WT	0	0	0	0
MIA40	WT	0.869535894161	10	0.007725647522768157	0.32642312946731455
MIA40	WT	0.08749986550779831	60	0.7912594297021942	0.3305929548345282
YGR114C	WT	0	0	0	0
YGR114C	WT	1.498014872784129	10	0.4497599571169582	1.981985443058162
YGR114C	WT	-0.061100476419618806	60	0.9767325228612525	2.094950640375991
ELM1	WT	0	0	0	0
ELM1	WT	0.0628220433691704	10	0.887189787512348	0.44284219244945777
ELM1	WT	-0.3703852894981642	60	0.40898880117312475	0.448585151953043
ASI1	WT	0	0	0	0
ASI1	WT	0.6660239367164612	10	0.22870393799047198	0.5533119768999072
ASI1	WT	-0.22048438824283484	60	0.7017430290706651	0.5757244199202998
MSB4	WT	0	0	0	0
MSB4	WT	-0.6850010126722901	10	0.23404479218278354	0.5756291341031876
MSB4	WT	0.049457095362340116	60	0.9283060765794023	0.5496682452431714
RPL2A	WT	0	0	0	0
RPL2A	WT	-2.3785216741062873	10	1.0166596534394206e-26	0.22228962095423108
RPL2A	WT	-1.2745510569508978	60	8.541688194165417e-9	0.22137596510826518
SPT5	WT	0	0	0	0
SPT5	WT	-0.7329196575214467	10	7.074436981742573e-7	0.1477866492685413
SPT5	WT	-0.852341334344293	60	7.468591136131644e-9	0.1474630531419363
TOM71	WT	0	0	0	0
TOM71	WT	-0.028978100733786153	10	0.925069494326279	0.3081140074466999
TOM71	WT	0.16158498640531038	60	0.5931223680594969	0.30241419543942927
YDL023C	WT	0	0	0	0
YDL023C	WT	-1.5366275787638264	10	0.49355175278401875	2.244330911907583
YDL023C	WT	-1.3137309522378617	60	0.5579138466311205	2.2420799324261447
SFT1	WT	0	0	0	0
SFT1	WT	-0.8180787139752139	10	0.03095014938361	0.37914157182017294
SFT1	WT	0.31392408816701156	60	0.3507514470039331	0.3364195482306258
CLB1	WT	0	0	0	0
CLB1	WT	-0.194448351055983	10	0.5411472537065499	0.31820490910245647
CLB1	WT	0.23866953278091474	60	0.43315469212141694	0.3045012623628846
VPS27	WT	0	0	0	0
VPS27	WT	-0.08821259495595775	10	0.7729291663163711	0.30571462310821773
VPS27	WT	-0.48161556938112815	60	0.11874059030290894	0.30871177368347524
RTT107	WT	0	0	0	0
RTT107	WT	-0.7211505554567275	10	0.029239732030823033	0.3307667071390177
RTT107	WT	0.771595826010808	60	0.012166515920522395	0.30774249428278666
MHR1	WT	0	0	0	0
MHR1	WT	0.3899379287986748	10	0.039749555585494735	0.18962697593098532
MHR1	WT	0.38903617312705924	60	0.0380582609677576	0.18755720951451646
ECM31	WT	0	0	0	0
ECM31	WT	0.07201273521666254	10	0.7981448158166322	0.28157605037776207
ECM31	WT	0.3656569471729119	60	0.18022720042744844	0.2728669535892679
SPH1	WT	0	0	0	0
SPH1	WT	2.784628204108311	10	2.0793021162667072e-4	0.7507392365503937
SPH1	WT	0.8566298039509744	60	0.2688300394161876	0.7746971643492413
MTF2	WT	0	0	0	0
MTF2	WT	0.512382660524895	10	0.30123826214546356	0.4956391625509335
MTF2	WT	-0.2587564370115227	60	0.6087643433152925	0.5055435532218957
YAR047C	WT	0	0	0	0
YAR047C	WT	-1.3297624737339622	10	0.38126726896760255	1.5187501269166803
YAR047C	WT	-1.3823314127496609	60	0.3588127832141168	1.5064153542845358
1	WT	0	0	0	0
1	WT	-0.9662337221467243	10	0.0043887036939580975	0.3391744117691401
1	WT	-0.29087093115520357	60	0.3706117181984584	0.32487635321832514
PRO3	WT	0	0	0	0
PRO3	WT	-0.7511297440057544	10	4.2163008544396726e-5	0.18341282738817166
PRO3	WT	-0.3499288000347669	60	0.0539242842388603	0.18155066863409655
RPS4A	WT	0	0	0	0
RPS4A	WT	-2.130805685565071	10	6.841079562675845e-20	0.23338149200410757
RPS4A	WT	-1.1682446764397825	60	4.957671967832359e-7	0.23235038619534326
YMR1	WT	0	0	0	0
YMR1	WT	0.0632746825884882	10	0.8879275200209626	0.4489886981319499
YMR1	WT	-0.30329811376653254	60	0.5053022816173536	0.4552861832317178
YDR433W	WT	0	0	0	0
YDR433W	WT	0.1075539902844256	10	0.8388971181087939	0.5290293337338916
YDR433W	WT	-1.519009382281315	60	0.0042420231212618184	0.5312001566863477
WIP1	WT	0	0	0	0
WIP1	WT	0.8966450927116341	10	0.032171640792680326	0.4185487658771694
WIP1	WT	1.1280833219074031	60	0.0059108349704741076	0.4098116701812982
CIR1	WT	0	0	0	0
CIR1	WT	0.2992094764013365	10	0.12315627905826224	0.19408268361124784
CIR1	WT	0.579580822851887	60	0.002378847129625786	0.19075569518422045
ASE1	WT	0	0	0	0
ASE1	WT	0.5435220235006353	10	0.037374188772444424	0.2611011817810135
ASE1	WT	-0.29846876394478095	60	0.28348434083991797	0.27828609563041423
LEM3	WT	0	0	0	0
LEM3	WT	0.6798412131649202	10	0.1178972303594093	0.43477535547513324
LEM3	WT	-0.02167064711048834	60	0.9607464700036574	0.4403093621351035
YAL056C-A	WT	0	0	0	0
YAL056C-A	WT	0.09792002389063405	10	0.9603165960708295	1.967992721421585
YAL056C-A	WT	-2.166276832476251	60	0.3380029215240802	2.2609692285916676
SNF8	WT	0	0	0	0
SNF8	WT	0.5172146736783815	10	0.13913462251770078	0.34970062579284655
SNF8	WT	0.529474198610303	60	0.12561854088072416	0.3456976457109257
DAN1	WT	0	0	0	0
DAN1	WT	-0.9890947017925038	10	0.35098267035340874	1.060481063623668
DAN1	WT	-0.31150349304770364	60	0.7559297224842653	1.0021661657685477
PHO85	WT	0	0	0	0
PHO85	WT	-0.003915802965234951	10	0.985235267628957	0.21159749647715245
PHO85	WT	-0.04260188788934409	60	0.8391974308617453	0.20994408010765198
YNL319W	WT	0	0	0	0
YNL319W	WT	-0.32875961725305747	10	0.8769140086010381	2.1226399023460027
YNL319W	WT	-1.7896381193690103	60	0.4289754504704894	2.262654989318242
NTA1	WT	0	0	0	0
NTA1	WT	1.1398150453874982	10	8.958019422940693e-4	0.3431772973387923
NTA1	WT	-0.25318740327751527	60	0.48401153299243727	0.3617659900451215
CAT8	WT	0	0	0	0
CAT8	WT	1.8394866680122186	10	2.9188921072467006e-4	0.5078096764697858
CAT8	WT	0.6459209693981786	60	0.21443022994078198	0.5202850087469851
FYV6	WT	0	0	0	0
FYV6	WT	1.0952230215034842	10	0.009024335720035982	0.41944394370425153
FYV6	WT	0.9420095749713758	60	0.024777342865701907	0.4196301869267747
CAF20	WT	0	0	0	0
CAF20	WT	-0.6061223807867686	10	1.3048229751740412e-4	0.15844072989902241
CAF20	WT	-0.7761969368325212	60	9.604619907382463e-7	0.15842141210873986
YOR015W	WT	0	0	0	0
YOR015W	WT	1.3715260805216543	10	0.4274459468294451	1.7282993400483828
YOR015W	WT	1.120447376046128	60	0.5177383713901431	1.7321981587078001
SUL2	WT	0	0	0	0
SUL2	WT	1.3291271433939484	10	0.037140880175016704	0.637712042084471
SUL2	WT	-0.21979755833638664	60	0.7369672638393978	0.6544083660181291
QCR9	WT	0	0	0	0
QCR9	WT	2.283802678483205	10	2.186553527751396e-11	0.3412230573817422
QCR9	WT	0.7611665294294172	60	0.029717300308032914	0.3501486835935655
YIM2	WT	0	0	0	0
YIM2	WT	0.5355628346737228	10	0.7431657312615315	1.6344879099230551
YIM2	WT	1.624754143402266	60	0.2800876454847225	1.5042314027228367
MDJ2	WT	0	0	0	0
MDJ2	WT	0.33414001467695353	10	0.6351168074731111	0.7041385711148116
MDJ2	WT	0.12584000028973394	60	0.8593613439996824	0.7102092888732695
THI13	WT	0	0	0	0
THI13	WT	-0.9102453989036996	10	0.2302327041981678	0.7586897998933452
THI13	WT	-1.332072529977488	60	0.08099383310076247	0.7633878744268464
MAL11	WT	0	0	0	0
MAL11	WT	0.19633951656659632	10	0.7967761539884664	0.7624196470270144
MAL11	WT	-0.6182256932642468	60	0.44915173111802553	0.8168620593095857
RPB10	WT	0	0	0	0
RPB10	WT	-1.4278654552720118	10	1.1221196399358055e-10	0.22139128986205292
RPB10	WT	-0.4331391300026323	60	0.03471178539921222	0.20511349404229814
RSM28	WT	0	0	0	0
RSM28	WT	0.37321834009927746	10	0.18132797150694224	0.2792134797624293
RSM28	WT	0.2753968104021947	60	0.3223336105035727	0.27827029966775335
COX17	WT	0	0	0	0
COX17	WT	1.15226827445697	10	7.762746892368051e-4	0.34282284918537415
COX17	WT	1.3465479535812754	60	7.632154238219157e-5	0.3404098711644705
BLI1	WT	0	0	0	0
BLI1	WT	0.36648821698475986	10	0.3325590200482181	0.37822363407704784
BLI1	WT	0.3312417427873853	60	0.37712075664497574	0.37504139506299305
YKL066W	WT	0	0	0	0
YKL066W	WT	0.7090310750879691	10	0.4961343080548688	1.0417969587264069
YKL066W	WT	-1.2123149947668492	60	0.2889620887598113	1.143260612128821
YMR007W	WT	0	0	0	0
YMR007W	WT	2.309962229068468	10	0.10643685928525894	1.4308330844155779
YMR007W	WT	1.7225010423542166	60	0.23595076955652763	1.4533805224078618
YOR263C	WT	0	0	0	0
YOR263C	WT	1.3505847231965948	10	0.253598857359295	1.1830095076009814
YOR263C	WT	1.115949180833298	60	0.344603153171108	1.1807622197969885
YHL049C	WT	0	0	0	0
YHL049C	WT	-0.5797687860005758	10	0.7216704852006117	1.6275256911082256
YHL049C	WT	-0.6636413494152256	60	0.6816789188315773	1.6179540579566989
GCN5	WT	0	0	0	0
GCN5	WT	-0.30618444410280715	10	0.2828994015943866	0.28513337766525
GCN5	WT	-0.48179856391138043	60	0.0923850298117038	0.2862823889370758
GCN3	WT	0	0	0	0
GCN3	WT	-0.9426532279850866	10	4.543892831118851e-5	0.23115987866149112
GCN3	WT	-0.18987432366853535	60	0.37802438758056	0.21538879169499944
YHR140W	WT	0	0	0	0
YHR140W	WT	1.3366229622617374	10	0.1854121508159531	1.009325284405225
YHR140W	WT	1.0058239734226913	60	0.3193086369465665	1.0099854940480504
YHL026C	WT	0	0	0	0
YHL026C	WT	-0.7930515414239837	10	0.41209008283115367	0.9668753386447526
YHL026C	WT	-0.5577986538332098	60	0.5530204774193606	0.9402578325760167
ATP11	WT	0	0	0	0
ATP11	WT	0.0033124401448685926	10	0.9942791048908973	0.461977042737672
ATP11	WT	0.025046934936618845	60	0.9565352300105103	0.4595600800942844
FEX2	WT	0	0	0	0
FEX2	WT	0.5410261396804289	10	0.5448790429092183	0.8935912163009915
FEX2	WT	0.8621391972837432	60	0.3210073043398757	0.8687503682602163
TIS11	WT	0	0	0	0
TIS11	WT	0.24063443658165035	10	0.459311701133203	0.32519014939303975
TIS11	WT	-0.561843662285641	60	0.0889841825935478	0.33034457420305424
PTP2	WT	0	0	0	0
PTP2	WT	1.0447918373114153	10	0.04176044112153184	0.5131843698028985
PTP2	WT	0.10211044131650843	60	0.8492423338778624	0.5371823707562607
FRT1	WT	0	0	0	0
FRT1	WT	-0.4600017098042499	10	0.18646784546696343	0.3481958400662129
FRT1	WT	0.06717212476979181	60	0.8374529934936012	0.3274253572711884
PET191	WT	0	0	0	0
PET191	WT	0.8282156156512013	10	0.03203107347183846	0.3862905192857798
PET191	WT	1.0150752627738644	60	0.007796393242218837	0.3814978859827349
TAD2	WT	0	0	0	0
TAD2	WT	1.0108690372146658	10	0.0014542516296466115	0.31751778980564005
TAD2	WT	1.1105528277153318	60	3.803343352852326e-4	0.31253541125339085
RAD33	WT	0	0	0	0
RAD33	WT	-0.4283231343553439	10	0.3595242754200237	0.4674628898259462
RAD33	WT	0.25560168600005917	60	0.5624984465718277	0.4413511914730456
VOA1	WT	0	0	0	0
VOA1	WT	0.5622516721842651	10	0.2659209282266568	0.5053923279909727
VOA1	WT	-0.20775119956537708	60	0.6827915819162083	0.5083758009052887
TGL4	WT	0	0	0	0
TGL4	WT	1.5423136267329285	10	8.28462744337195e-10	0.2512166760975134
TGL4	WT	-0.03811829273068724	60	0.8855665949505727	0.2648643903688627
TSL1	WT	0	0	0	0
TSL1	WT	7.095713312091626	10	5.1508193871510016e-126	0.29716186287074825
TSL1	WT	3.176535573882693	60	3.0820066346142216e-26	0.2997623713968428
MKS1	WT	0	0	0	0
MKS1	WT	-0.3653861299707512	10	0.2543197702711467	0.32053673628644813
MKS1	WT	-0.21605417617176023	60	0.48837137329841024	0.3118108110068324
HSP78	WT	0	0	0	0
HSP78	WT	6.1565674461939395	10	4.2289780977213084e-203	0.20246144734406876
HSP78	WT	2.1975074892558535	60	1.467548884038707e-26	0.20602851539042324
YKR011C	WT	0	0	0	0
YKR011C	WT	2.8350437177529253	10	6.471777269102239e-26	0.2693060266912035
YKR011C	WT	0.8260062443423349	60	0.003063358530895918	0.2789329459286369
UTP21	WT	0	0	0	0
UTP21	WT	-3.5727937113847847	10	1.1787692683954879e-19	0.3938677679161375
UTP21	WT	-0.5255571828755681	60	0.11936797859557559	0.3374511493725021
YMR173W-A	WT	0	0	0	0
YMR173W-A	WT	2.3063500305919438	10	4.678895688061091e-5	0.56651578686603
YMR173W-A	WT	-0.7604883405328298	60	0.18121515001945177	0.5687922919656485
VBA1	WT	0	0	0	0
VBA1	WT	0.37042158564570193	10	0.4599617583801614	0.5013082451266825
VBA1	WT	-0.3491704629936675	60	0.5009800758310574	0.5188665695823862
YML094C-A	WT	0	0	0	0
YML094C-A	WT	0.343550477848297	10	0.8217137121708353	1.5245778675475792
YML094C-A	WT	-0.8137473365308986	60	0.6338577025209027	1.708461537430486
YBR056W-A	WT	0	0	0	0
YBR056W-A	WT	2.4746505650005606	10	0.001240710670510993	0.7662994125901273
YBR056W-A	WT	1.486021601446423	60	0.06366692128595842	0.801303563897215
SPB1	WT	0	0	0	0
SPB1	WT	-3.749508562711388	10	8.840034226740489e-9	0.6519065204920865
SPB1	WT	-0.599721006508235	60	0.33442613375076724	0.6213199714844011
SRX1	WT	0	0	0	0
SRX1	WT	1.5513587857810125	10	0.003147901266948277	0.5253654635685252
SRX1	WT	0.6504365750248257	60	0.23342150413728313	0.5458553850887342
IZH1	WT	0	0	0	0
IZH1	WT	-1.9203649855385116	10	0.005401720004285846	0.6902704793627079
IZH1	WT	-0.9772647010302933	60	0.1179124515718436	0.6250109613498305
SNC1	WT	0	0	0	0
SNC1	WT	0.5789972262066102	10	0.04973926850042648	0.2950756242391462
SNC1	WT	0.6074204595158363	60	0.03786577592652378	0.2925488008179937
CSM3	WT	0	0	0	0
CSM3	WT	-0.033344142902096	10	0.9314689949794964	0.38773721184204707
CSM3	WT	0.03738842985947873	60	0.9223152849051797	0.38340150431845604
STP4	WT	0	0	0	0
STP4	WT	0.895155521787444	10	0.08958377594830774	0.5273073153464047
STP4	WT	-0.12534232684171673	60	0.8275873438302863	0.5755009133555486
RPL8B	WT	0	0	0	0
RPL8B	WT	-1.6687359603616425	10	6.896438385439333e-21	0.17799237287070233
RPL8B	WT	-1.3338261442653399	60	5.742679423321937e-14	0.17751639658398696
YNL097W-A	WT	0	0	0	0
YNL097W-A	WT	-1.1083646396515248	10	0.6591088123757569	2.512478581415531
YNL097W-A	WT	2.4123584386719616	60	0.26484433029320315	2.163522586797318
DPB4	WT	0	0	0	0
DPB4	WT	-0.646687077296671	10	0.0063795262490471405	0.23708940042625748
DPB4	WT	0.2959515936059366	60	0.17189496015149563	0.2166333966549603
DPL1	WT	0	0	0	0
DPL1	WT	0.27077663000206154	10	0.6529638798303865	0.602196168596581
DPL1	WT	-0.3120733963956207	60	0.6079902464211376	0.6083962016403044
ATH1	WT	0	0	0	0
ATH1	WT	1.4080791644925426	10	0.052630001942034904	0.7265838683722594
ATH1	WT	-0.031086491395314605	60	0.9666131245227906	0.7426927686906242
SIS2	WT	0	0	0	0
SIS2	WT	-1.3347819561808874	10	8.368155949876607e-8	0.24907272281650916
SIS2	WT	-0.5261621838589254	60	0.02288106429202749	0.2312379293146069
TRK1	WT	0	0	0	0
TRK1	WT	-0.48500554488545417	10	0.39204235872838605	0.5666486121367931
TRK1	WT	-0.4696350561680958	60	0.40284622463655173	0.5613958748884834
QCR10	WT	0	0	0	0
QCR10	WT	2.045494356221531	10	1.1382507455900827e-9	0.33594880122152637
QCR10	WT	0.7774646077436675	60	0.025948258341208952	0.34911079953856394
YER067C-A	WT	0	0	0	0
YER067C-A	WT	-2.2540573770155197	10	0.29425045702495206	2.149089732101599
YER067C-A	WT	-1.3816074835949719	60	0.4991103280744821	2.0441299193376614
YIR036W-A	WT	0	0	0	0
YIR036W-A	WT	-0.5817803814114432	10	0.745447431215936	1.792033930941293
YIR036W-A	WT	-2.6088078437159643	60	0.18916312072408167	1.9868171609995886
RPN7	WT	0	0	0	0
RPN7	WT	0.12320353600780667	10	0.48578260740508916	0.17675442546159853
RPN7	WT	-0.06257610457478106	60	0.7233607939760867	0.17678325738693404
THI3	WT	0	0	0	0
THI3	WT	0.29234982959369166	10	0.3828656903584331	0.33502215944276015
THI3	WT	0.19202297148458802	60	0.5662111093246807	0.33474445465569397
SHH4	WT	0	0	0	0
SHH4	WT	1.6544730284744873	10	0.13049530481598273	1.0941185043180564
SHH4	WT	0.29003070015540167	60	0.8010993182299624	1.1512597849340376
NQM1	WT	0	0	0	0
NQM1	WT	3.6826053165648966	10	1.0638670029721249e-13	0.49545861582558426
NQM1	WT	2.5883517720603795	60	2.3702972504143959e-7	0.5008739972086289
ERB1	WT	0	0	0	0
ERB1	WT	-2.116494625356849	10	7.504217668621471e-27	0.19728325896022542
ERB1	WT	-0.6027086259885982	60	9.041444162468244e-4	0.18160595264436397
SKO1	WT	0	0	0	0
SKO1	WT	0.6505659173100354	10	0.014041726419009491	0.26486746240711884
SKO1	WT	0.020866681330197208	60	0.9396120367450659	0.27544050440669965
HST1	WT	0	0	0	0
HST1	WT	-0.1633105058120436	10	0.69030353983322	0.4098715129809477
HST1	WT	0.14865284103213391	60	0.7058551086609657	0.39385684364879026
YML122C	WT	0	0	0	0
YML122C	WT	0.6638964148412715	10	0.7147208897138446	1.8162907559583126
YML122C	WT	2.4051273672760516	60	0.1479037328694901	1.6621753821605654
SYT1	WT	0	0	0	0
SYT1	WT	0.1456710697111576	10	0.6872366021865489	0.3618185908691268
SYT1	WT	-0.0035107204392143348	60	0.9922573078537701	0.3617741244157893
QRI1	WT	0	0	0	0
QRI1	WT	0.24527237560743384	10	0.3375300270411595	0.25574327032520866
QRI1	WT	0.38365268608852165	60	0.13086392926560333	0.2539562563799579
GRH1	WT	0	0	0	0
GRH1	WT	-0.44033682472276253	10	0.028013441848057267	0.2004174632396574
GRH1	WT	0.22175179204494547	60	0.24141205721217418	0.18929447954172926
SUI2	WT	0	0	0	0
SUI2	WT	-1.2930824399300176	10	2.1050288777485102e-13	0.17612246211915814
SUI2	WT	-0.7526481620367097	60	1.1567905104682175e-5	0.1716189834392516
PDR18	WT	0	0	0	0
PDR18	WT	0.5864197655419726	10	0.37952091871241617	0.6673117181776685
PDR18	WT	-0.7098175353155614	60	0.3171970123006795	0.7096510860562629
MSY1	WT	0	0	0	0
MSY1	WT	1.0219161442522136	10	0.007552818085023598	0.3825348413587535
MSY1	WT	0.5954641032871109	60	0.12564300678157406	0.38880809732329236
VMA9	WT	0	0	0	0
VMA9	WT	-0.13794261154515894	10	0.46271739456718475	0.18783556190752917
VMA9	WT	-0.3496534211510328	60	0.06326865289068459	0.18825910956463074
ENA5	WT	0	0	0	0
ENA5	WT	1.0695657764915825	10	0.1741799630832586	0.7870851124152927
ENA5	WT	0.47429413905911755	60	0.5489847098081488	0.7914370425696708
GAT3	WT	0	0	0	0
GAT3	WT	0.48910501237621523	10	0.6624333603197611	1.1203716923353446
GAT3	WT	-5.012038469309786e-4	60	0.99965196413797075	1.1490275636195173
CDC28	WT	0	0	0	0
CDC28	WT	0.6850969426437172	10	0.003324337457728401	0.23334063629351304
CDC28	WT	0.6168558593523974	60	0.007973225739747309	0.23249491572896666
YHR032W-A	WT	0	0	0	0
YHR032W-A	WT	2.873021946466889	10	0.12773497374512538	1.8863053216958658
YHR032W-A	WT	1.0229999990159229	60	0.6254939585376127	2.0959726116951996
ZAP1	WT	0	0	0	0
ZAP1	WT	0.24164475539732147	10	0.5824927100195975	0.4395560574210459
ZAP1	WT	-0.10608794177726227	60	0.8110691805280659	0.44379542922913945
YKL050C	WT	0	0	0	0
YKL050C	WT	-0.1488765550556106	10	0.8778261110188352	0.9684565877948083
YKL050C	WT	-0.594901179056463	60	0.5434008386707514	0.97897382632725
HHY1	WT	0	0	0	0
HHY1	WT	0.3762655952662519	10	0.7089411961945964	1.0080023950042964
HHY1	WT	-2.062219285530346	60	0.09165726619909491	1.2226212279118893
RRN7	WT	0	0	0	0
RRN7	WT	-1.6182609518042048	10	0.0682563069308408	0.8875397478849162
RRN7	WT	-1.124268742036018	60	0.18645877919466647	0.8509917085665694
RPN10	WT	0	0	0	0
RPN10	WT	-0.22616370991443924	10	0.19804438882163453	0.17570983097648538
RPN10	WT	-0.0051595785495426195	60	0.9762482925496141	0.17329869703505824
SCY1	WT	0	0	0	0
SCY1	WT	-0.5516156128913029	10	0.3694687446761871	0.6146347730312719
SCY1	WT	-0.3411882854844105	60	0.5753473686811739	0.6090541996997783
UGO1	WT	0	0	0	0
UGO1	WT	0.6408637121335335	10	0.31292867458192664	0.6350870640701701
UGO1	WT	-0.0023510705021879256	60	0.9970575574257535	0.6375242866220495
COX19	WT	0	0	0	0
COX19	WT	1.2128877341677486	10	0.001960187011457448	0.39173441321949326
COX19	WT	0.40795233001574244	60	0.31846559269719105	0.4089272067368186
YOL162W	WT	0	0	0	0
YOL162W	WT	0.2824464945626907	10	0.8044690564020027	1.1408867898214472
YOL162W	WT	-0.6986591241982614	60	0.5539785885964128	1.180548602299862
RRP4	WT	0	0	0	0
RRP4	WT	-2.885595220531555	10	1.076904724546261e-19	0.31776567873172634
RRP4	WT	-0.4778041710260896	60	0.03341981932652122	0.2246372626380495
CRN1	WT	0	0	0	0
CRN1	WT	-0.4042128247534462	10	0.03961784533267608	0.1964380547389579
CRN1	WT	-0.2711816388500699	60	0.16379456490753727	0.1947553159001378
UGA3	WT	0	0	0	0
UGA3	WT	1.1543712113039108	10	4.3667633349405414e-4	0.3282387337950241
UGA3	WT	0.6864161430918058	60	0.04050640225536246	0.33507458804890494
SFM1	WT	0	0	0	0
SFM1	WT	-1.1728105797628297	10	2.4452931953430266e-7	0.22720768578188658
SFM1	WT	-0.4041989423209194	60	0.06424928783846037	0.2184332493975769
YLR365W	WT	0	0	0	0
YLR365W	WT	-1.2068244628221911	10	0.38126296096448475	1.3783275284239145
YLR365W	WT	-1.4375382848672262	60	0.30709788302393337	1.4075152866915697
PEX6	WT	0	0	0	0
PEX6	WT	-0.43038570016476146	10	0.1432947464389644	0.2940533816768005
PEX6	WT	-0.3877366380187459	60	0.17865294116094846	0.28829841746340584
COX16	WT	0	0	0	0
COX16	WT	0.5993965010968785	10	0.0376727473781473	0.28839355935965283
COX16	WT	0.31967969319027467	60	0.27354814268042976	0.2919640995717173
TAM41	WT	0	0	0	0
TAM41	WT	0.5425603703881476	10	0.1750494725009956	0.40007218023615515
TAM41	WT	0.042054309183302364	60	0.917854700939009	0.4077542112238152
IST1	WT	0	0	0	0
IST1	WT	0.8538012321589372	10	4.989479840938958e-4	0.24525211617290685
IST1	WT	0.21247712167477084	60	0.4040514675117982	0.25464435021389104
HED1	WT	0	0	0	0
HED1	WT	0.9906009947028546	10	0.26944379717144373	0.8970037353697969
HED1	WT	0.48009696572732324	60	0.5951415398504734	0.9034566413866758
EGT2	WT	0	0	0	0
EGT2	WT	-0.07922337362744777	10	0.9149277021843021	0.7416173111659738
EGT2	WT	-0.7240037578742593	60	0.33083624476297585	0.7445298029038434
RTT106	WT	0	0	0	0
RTT106	WT	-0.7513154710894815	10	0.0041829523048771714	0.2623285472761629
RTT106	WT	-0.10762234819283881	60	0.6625977181273965	0.24665387209937142
KSH1	WT	0	0	0	0
KSH1	WT	-0.2932612257283141	10	0.38906902509705177	0.340484000210123
KSH1	WT	0.24283262425731	60	0.4619062190141862	0.33006495888331844
GSF2	WT	0	0	0	0
GSF2	WT	0.09998013492567429	10	0.7830346530314845	0.3630801960453589
GSF2	WT	-0.21596356247417403	60	0.5527530980649205	0.36379566498452587
ARO10	WT	0	0	0	0
ARO10	WT	4.601121439745954	10	5.7252924507096764e-27	0.4278847143908134
ARO10	WT	2.160086953381554	60	5.594727483526982e-7	0.43161113491108594
PFA3	WT	0	0	0	0
PFA3	WT	-0.9373362527224305	10	0.19231348185995392	0.7189453250894575
PFA3	WT	-0.43184167639145726	60	0.5193835967199465	0.6702536832528614
YMR001C-A	WT	0	0	0	0
YMR001C-A	WT	-1.2903789538971349	10	0.4889622886254426	1.8648165750799726
YMR001C-A	WT	-0.4533561768971631	60	0.7730758220760336	1.572221201666446
EUG1	WT	0	0	0	0
EUG1	WT	0.6001543225177232	10	0.3092723949648978	0.590267370881822
EUG1	WT	0.404169877800759	60	0.4939486589768397	0.5908553729835401
POM152	WT	0	0	0	0
POM152	WT	0.5655136879279011	10	0.36285730252026527	0.621488668517497
POM152	WT	-0.26357646489126624	60	0.6740920524824288	0.6267592985542134
SRN2	WT	0	0	0	0
SRN2	WT	0.4583040117662985	10	0.20599643902501857	0.36239562394876174
SRN2	WT	-0.22114967798415736	60	0.5624032870944564	0.38176942402427017
ATP22	WT	0	0	0	0
ATP22	WT	0.5474604255052501	10	0.1575747348086301	0.38736992576780327
ATP22	WT	-0.6081792778236691	60	0.1499121050771684	0.4223930661752623
RPN3	WT	0	0	0	0
RPN3	WT	-0.09496788999257462	10	0.5798616554441753	0.17155013160447524
RPN3	WT	-0.4203914626861211	60	0.014726334221045936	0.1723593898819422
YBL109W	WT	0	0	0	0
YBL109W	WT	-0.41619679813512545	10	0.9011503320638872	3.3507963585392604
YBL109W	WT	-3.0532341496337914	60	0.3815150048934299	3.48897879313224
SPT15	WT	0	0	0	0
SPT15	WT	-1.2400473193508117	10	2.7254819711160096e-9	0.2085048071261534
SPT15	WT	0.0018167419417577464	60	0.9923701401474082	0.1899809802440667
RPC37	WT	0	0	0	0
RPC37	WT	-1.381279514537318	10	6.231904605507892e-6	0.30570340714982525
RPC37	WT	-0.33084027603212085	60	0.2563057088323709	0.29144656542438224
POP5	WT	0	0	0	0
POP5	WT	-0.4582540376391519	10	0.15886707149990567	0.32525843023315537
POP5	WT	-0.295288611769357	60	0.3542874466317718	0.318781157517613
ARO80	WT	0	0	0	0
ARO80	WT	0.602107457856925	10	0.06429961125601959	0.32544647682961597
ARO80	WT	0.5809065310602815	60	0.07197087215159258	0.3228509885847444
ARG5,6	WT	0	0	0	0
ARG5,6	WT	-0.2036473857017194	10	0.7385378556194359	0.6101058892754695
ARG5,6	WT	0.8074623379892535	60	0.17537596153596366	0.5958557483957645
OST4	WT	0	0	0	0
OST4	WT	-0.322987716714957	10	0.3279770482597319	0.3301868803019621
OST4	WT	0.2280569479604349	60	0.4702116094755491	0.31580938980024
YMR321C	WT	0	0	0	0
YMR321C	WT	-0.7428566504206835	10	0.03170492110926987	0.3458185234972268
YMR321C	WT	-0.7379510165133992	60	0.03061819016527381	0.34132797335288106
YGL165C	WT	0	0	0	0
YGL165C	WT	0.7945269580024328	10	0.42679265530719995	0.999792250859765
YGL165C	WT	-0.6378231121412673	60	0.5443131858075921	1.0519863968431522
YGR283C	WT	0	0	0	0
YGR283C	WT	-2.520504180396225	10	2.0633220655571648e-7	0.4853152213577308
YGR283C	WT	-0.5353627428211319	60	0.17126563252227092	0.391304588578806
EFG1	WT	0	0	0	0
EFG1	WT	-3.331113051663068	10	4.776991525505716e-15	0.42528566552464797
EFG1	WT	-0.26017441884738524	60	0.3240620010778002	0.26382980062000133
URM1	WT	0	0	0	0
URM1	WT	-0.8723105683745043	10	0.0014541017269440923	0.2739934821460808
URM1	WT	-0.1860849051289386	60	0.4794325825386732	0.2631233498548053
YBL044W	WT	0	0	0	0
YBL044W	WT	-0.15345917976093837	10	0.9520638581819186	2.552750335737649
YBL044W	WT	1.5608911093047622	60	0.5014515354993552	2.3220372406221435
PRR1	WT	0	0	0	0
PRR1	WT	-0.6909576751267462	10	0.04847492002872464	0.3501744646165365
PRR1	WT	-0.5673575695475555	60	0.09782539204292867	0.342713027720804
UTP23	WT	0	0	0	0
UTP23	WT	-4.183595328182743	10	7.974611883223112e-20	0.459053358252699
UTP23	WT	-0.7632167552595482	60	0.002141123499980314	0.24861085937511662
UTP10	WT	0	0	0	0
UTP10	WT	-2.3667208042836223	10	6.647554899090556e-24	0.23475108559607208
UTP10	WT	-0.8543826578935888	60	7.40047593778095e-5	0.21558828813438527
YDL085C-A	WT	0	0	0	0
YDL085C-A	WT	0.14230316235075138	10	0.6156653801158614	0.28347071635834825
YDL085C-A	WT	0.6469465305181159	60	0.018257376134967824	0.27408847224305544
PEA2	WT	0	0	0	0
PEA2	WT	-1.244909682546605	10	1.006954894577113e-4	0.32011790317314254
PEA2	WT	0.14723147070842083	60	0.5977680841641091	0.2790521031687656
YAR030C	WT	0	0	0	0
YAR030C	WT	-2.632187274943076	10	0.22151778217241191	2.153114595931052
YAR030C	WT	0.2128621842041715	60	0.9062250551339301	1.8069586931289912
OAR1	WT	0	0	0	0
OAR1	WT	-0.8579520216310943	10	0.15300278253267638	0.6003841783501485
OAR1	WT	0.4679611710128011	60	0.36216244161978073	0.5135363278256092
SWT21	WT	0	0	0	0
SWT21	WT	1.8142996395801678	10	0.015422456328612676	0.7489975981732224
SWT21	WT	0.9311403955669915	60	0.23793714295810808	0.788995986298922
YER148W-A	WT	0	0	0	0
YER148W-A	WT	0.613608959707062	10	0.6528161368277944	1.3640197755914065
YER148W-A	WT	-0.7332870326641567	60	0.6297692882285804	1.5211795306259654
RDS1	WT	0	0	0	0
RDS1	WT	-0.10801176391559483	10	0.8232870980853002	0.4836654079430631
RDS1	WT	-0.14339396979950503	60	0.7649897160845998	0.4796829304429537
FIT2	WT	0	0	0	0
FIT2	WT	0.9094905306152067	10	0.09607563645679831	0.5465083511775746
FIT2	WT	-1.0536778150357262	60	0.054620249716058	0.5482523160384706
YDR467C	WT	0	0	0	0
YDR467C	WT	1.4114411937614206	10	0.46580737102841785	1.935290022242509
YDR467C	WT	1.5435590843759863	60	0.42036618023373534	1.915594024585934
PAP1	WT	0	0	0	0
PAP1	WT	-0.2929240744123487	10	0.1949137998790896	0.22599043760122137
PAP1	WT	-0.051116883474283	60	0.8161989340527092	0.219917543842582
IGO2	WT	0	0	0	0
IGO2	WT	1.4399604683693934	10	3.083704252002437e-9	0.2429460514589405
IGO2	WT	0.7154764027032314	60	0.004214897090428131	0.2500254640601046
YJL215C	WT	0	0	0	0
YJL215C	WT	2.40701924990929	10	0.3740123894972135	2.707610969877018
YJL215C	WT	0.3284120766570793	60	0.9080761734559033	2.844244459262896
YER066C-A	WT	0	0	0	0
YER066C-A	WT	-0.3961171430747604	10	0.8529807825086801	2.1375166456360066
YER066C-A	WT	-0.26943513254675133	60	0.8998556601818262	2.141030202145632
HEM25	WT	0	0	0	0
HEM25	WT	0.14547330273253625	10	0.7483033937423542	0.45336118427881555
HEM25	WT	0.5208945762546536	60	0.23162357221460755	0.4354624764275932
RPS17B	WT	0	0	0	0
RPS17B	WT	-1.6048881278342295	10	3.6251325466399067e-22	0.1657740478822543
RPS17B	WT	-0.9695985977548243	60	3.5187873192980567e-9	0.1641895993834689
ATG27	WT	0	0	0	0
ATG27	WT	0.00880788054447696	10	0.9864088743269008	0.517052979855688
ATG27	WT	-0.1260874939940771	60	0.8072497699054022	0.5168038486402776
SAY1	WT	0	0	0	0
SAY1	WT	0.5950741200947236	10	0.45850612012943737	0.802734269832292
SAY1	WT	-0.6530130671823186	60	0.42727311920145455	0.8225728358554516
5	WT	0	0	0	0
5	WT	-0.4987209491116384	10	0.032569432362953364	0.23333597896862843
5	WT	-0.3850158824384232	60	0.09361868823634265	0.22963944296021693
AKR2	WT	0	0	0	0
AKR2	WT	-0.9891465863485007	10	0.03422944912709675	0.46716069694539086
AKR2	WT	-0.28333612539565145	60	0.5142759699284472	0.434435282869876
THR4	WT	0	0	0	0
THR4	WT	-0.639418624890719	10	0.006428203518864525	0.23464043522155292
THR4	WT	-0.48990684812271257	60	0.03642067263731217	0.23415876287368956
NSG2	WT	0	0	0	0
NSG2	WT	1.4092548768271442	10	9.860037532193069e-6	0.318820061414354
NSG2	WT	0.32022138987834725	60	0.3363826144527225	0.3330999432780828
YPL108W	WT	0	0	0	0
YPL108W	WT	-1.561787021990763	10	0.001962494338454621	0.5044775705781088
YPL108W	WT	0.10076106911474737	60	0.8192277423417276	0.44089347419833075
FKH1	WT	0	0	0	0
FKH1	WT	-0.5344062913107851	10	0.023581335454413706	0.23605742084805661
FKH1	WT	0.255817228964867	60	0.24065962439895502	0.21802487200225978
ERI1	WT	0	0	0	0
ERI1	WT	-0.0890790759333087	10	0.87650668430197	0.5732277029980295
ERI1	WT	0.3736839025807866	60	0.49627434588204267	0.5492415738949908
3	WT	0	0	0	0
3	WT	0.379933328722526	10	0.2963790365521536	0.3638406913743698
3	WT	-0.08039426653963129	60	0.8290667229658855	0.37237034088708243
TAN1	WT	0	0	0	0
TAN1	WT	-0.2201066036789235	10	0.31775796681578367	0.22031021145979535
TAN1	WT	-0.15546164369729162	60	0.4746805315171879	0.21746405824022716
AFT2	WT	0	0	0	0
AFT2	WT	-0.2814026719215514	10	0.40137842108684657	0.3353377294038034
AFT2	WT	-0.07011160337109357	60	0.829787845144168	0.32614041814143324
HCR1	WT	0	0	0	0
HCR1	WT	-0.3063435684433607	10	0.402281619759167	0.3657600795346916
HCR1	WT	-0.2848551081477029	60	0.43564826684796976	0.36540367599832846
YPR127W	WT	0	0	0	0
YPR127W	WT	1.1669991594098204	10	3.6424214913297115e-5	0.2826303988667035
YPR127W	WT	0.3926652278650822	60	0.17672681568005463	0.29066891392548094
URH1	WT	0	0	0	0
URH1	WT	-0.443138635703739	10	0.12725298343467226	0.29057804098536927
URH1	WT	0.7466327508510882	60	0.005613945157866538	0.2695895042199616
YIL060W	WT	0	0	0	0
YIL060W	WT	0.32004925079499935	10	0.7683958638976129	1.0868512804601695
YIL060W	WT	0.45129198034832413	60	0.6712851908030341	1.0634027441486078
UBA3	WT	0	0	0	0
UBA3	WT	-0.5527941398814061	10	0.2615199142224101	0.49233274522247894
UBA3	WT	-0.24954951073309087	60	0.5929642484976698	0.46684437142141916
NRT1	WT	0	0	0	0
NRT1	WT	0.32720405501539496	10	0.6032406733763076	0.6295461674267123
NRT1	WT	0.24049023130904917	60	0.7014113659987045	0.627230610464495
HPA2	WT	0	0	0	0
HPA2	WT	0.7406722973173803	10	0.42774339909121967	0.9339433983294892
HPA2	WT	1.1794650588641409	60	0.186351880269979	0.892554725765489
SEC15	WT	0	0	0	0
SEC15	WT	0.28025534222202203	10	0.4273830075852089	0.35310970043899154
SEC15	WT	0.0018566490438431268	60	0.9958209493247823	0.3544787916701793
APD1	WT	0	0	0	0
APD1	WT	-0.1752669487636524	10	0.5089170646805607	0.2653449657309368
APD1	WT	0.04491001663753198	60	0.8623674603961646	0.25905448623276317
SLM3	WT	0	0	0	0
SLM3	WT	-0.21637861865155975	10	0.6033407482682133	0.4164311646007708
SLM3	WT	0.5518526940130347	60	0.14749659978204296	0.38100038009952497
EFM6	WT	0	0	0	0
EFM6	WT	-1.517099392595962	10	0.10444944737690906	0.9343729652688185
EFM6	WT	-0.7440993556320254	60	0.3819135053009117	0.8510061208465417
MAK31	WT	0	0	0	0
MAK31	WT	-1.134627906004844	10	9.255034243919652e-4	0.3425555140026638
MAK31	WT	-0.329252406365213	60	0.2902878469452616	0.3113526283073221
NSE3	WT	0	0	0	0
NSE3	WT	0.3803949555113899	10	0.5524026072302661	0.6402190753159659
NSE3	WT	0.5909582235506188	60	0.3521047545681909	0.6350875958535674
YPL113C	WT	0	0	0	0
YPL113C	WT	1.446867374504961	10	0.005895959590185425	0.5254625137482287
YPL113C	WT	1.0918948153917174	60	0.03914176889634779	0.5293539135947437
THI72	WT	0	0	0	0
THI72	WT	0.23900700745427986	10	0.780457348469348	0.8575070532594088
THI72	WT	-1.4676295238874255	60	0.11782869823020015	0.9384104833574001
VAC7	WT	0	0	0	0
VAC7	WT	0.6569816187116753	10	0.07790029171677865	0.3726495640097779
VAC7	WT	0.38342389968207125	60	0.305368153296864	0.3740759379317998
VMA8	WT	0	0	0	0
VMA8	WT	-0.8455631230900328	10	6.857514738865509e-6	0.1879838028523932
VMA8	WT	-0.5067985971842598	60	0.0062606704057433	0.18538198650836474
NOP6	WT	0	0	0	0
NOP6	WT	-1.866251074289065	10	7.522598097537708e-15	0.24002080702996803
NOP6	WT	-0.6734943788292299	60	0.0015951020614779728	0.21334711794900926
SEY1	WT	0	0	0	0
SEY1	WT	-0.9825514315753309	10	2.42368209086956e-7	0.19028769158781775
SEY1	WT	-0.18767522860814834	60	0.29240646902805983	0.1782532694117355
VPS20	WT	0	0	0	0
VPS20	WT	0.38125232709338264	10	0.2953351649699719	0.36431553886167123
VPS20	WT	0.1216824833556068	60	0.740558751156083	0.36749477628622973
ARC40	WT	0	0	0	0
ARC40	WT	0.5355280283857267	10	2.849349499765716e-4	0.1475842919150128
ARC40	WT	0.28338009240158624	60	0.055568721956230006	0.14802533118796493
ELP2	WT	0	0	0	0
ELP2	WT	-2.3444820597041987	10	4.292037143580176e-28	0.2133379903092386
ELP2	WT	-0.591138363626635	60	0.0013321707167382078	0.18421506664625836
MEP3	WT	0	0	0	0
MEP3	WT	0.48779602781832143	10	0.528951758859409	0.7747627442090006
MEP3	WT	0.4118153802656722	60	0.5939221718346444	0.772403496001605
SHU1	WT	0	0	0	0
SHU1	WT	-1.3132493682569177	10	0.1504925270499213	0.9133780053193111
SHU1	WT	0.6067574672817285	60	0.41343911147423407	0.7418874106914761
MGS1	WT	0	0	0	0
MGS1	WT	-0.38901783154464564	10	0.24071729222537133	0.33158815304610834
MGS1	WT	0.5444868240126188	60	0.06507658665682217	0.29515774206352285
RCK1	WT	0	0	0	0
RCK1	WT	1.2174239846657182	10	0.19595382428305785	0.9414293703904115
RCK1	WT	0.31821964739148895	60	0.7439077780772789	0.9740935407565184
MRE11	WT	0	0	0	0
MRE11	WT	-0.37010915003700057	10	0.5430200882209959	0.6084795592392805
MRE11	WT	-0.12152422681783173	60	0.8399036921360431	0.6015554402589396
ATP23	WT	0	0	0	0
ATP23	WT	-0.3815854853611291	10	0.25476849493535414	0.33506406608856976
ATP23	WT	0.23945053307230751	60	0.44683006511080015	0.31477226408088665
RLM1	WT	0	0	0	0
RLM1	WT	-0.4379000839762686	10	0.2163685414887456	0.3542186773781472
RLM1	WT	-0.3851211240006747	60	0.2671972003319799	0.34709973942842276
YEL068C	WT	0	0	0	0
YEL068C	WT	0.508067560539883	10	0.1933698614224762	0.39061850067565695
YEL068C	WT	-0.6056752839920527	60	0.1529484627397878	0.4237879923632756
TRE2	WT	0	0	0	0
TRE2	WT	1.513855940783205	10	0.0031682633521483987	0.5130110693405066
TRE2	WT	0.2922974262969883	60	0.577981586942131	0.5253978496327153
YBR139W	WT	0	0	0	0
YBR139W	WT	2.8797751959290974	10	4.854831746867714e-5	0.7088663732220913
YBR139W	WT	0.5865083739207336	60	0.41712451515213944	0.7228172474590249
8	WT	0	0	0	0
8	WT	0.03012852389194471	10	0.871556995332571	0.18634537653005545
8	WT	-0.0826198549400715	60	0.6567047977295848	0.18588513308414578
1	WT	0	0	0	0
1	WT	0.6532565870527083	10	0.38111377844557337	0.7458578490733654
1	WT	-0.09087044409215014	60	0.9070058035962679	0.7778933058092466
RAD9	WT	0	0	0	0
RAD9	WT	-0.5744578487779889	10	0.0781384727635982	0.32610176804343255
RAD9	WT	0.6586179153861523	60	0.029106186383296737	0.3018351187254005
YLR287C	WT	0	0	0	0
YLR287C	WT	-2.2501255915053053	10	0.0019695886537889158	0.7270712362009438
YLR287C	WT	-0.3880172008867794	60	0.5799145872505702	0.7010127398627172
YDL086W	WT	0	0	0	0
YDL086W	WT	-0.05716333726475736	10	0.773977261294388	0.19905305146581598
YDL086W	WT	-0.004486398424459791	60	0.9818317822882243	0.19700989537620112
AI4	WT	0	0	0	0
AI4	WT	1.3907201530651399	10	0.14014590217425554	0.9427026692957282
AI4	WT	0.492837081019382	60	0.6129296829537032	0.9741866157780221
COX5A	WT	0	0	0	0
COX5A	WT	0.7506328142816961	10	0.03405945997699956	0.3541778275547892
COX5A	WT	0.13704475486650805	60	0.7002239055610894	0.355943543597722
YKL177W	WT	0	0	0	0
YKL177W	WT	0.6559395142544591	10	0.5470933780079357	1.0893809650935224
YKL177W	WT	-0.28901835837848316	60	0.8075731292042693	1.1866508647240688
SNP1	WT	0	0	0	0
SNP1	WT	-0.8455729789375943	10	0.023151391759124104	0.37234703882788023
SNP1	WT	-0.10863508876009859	60	0.7484528290497263	0.3387646711402702
YKL068W-A	WT	0	0	0	0
YKL068W-A	WT	-0.5611024124464843	10	0.12467287428813482	0.36543145925400156
YKL068W-A	WT	-0.5489427239985822	60	0.12879555485373193	0.3614155275044599
ADH4	WT	0	0	0	0
ADH4	WT	0.22357924819073505	10	0.7858367120365151	0.822827158841253
ADH4	WT	-0.642707140705542	60	0.4389156667524661	0.8303435449821621
RRP14	WT	0	0	0	0
RRP14	WT	-2.6552744190953943	10	4.210571923535236e-27	0.24628107506949
RRP14	WT	-0.5872557763126371	60	0.003506578802241071	0.20115338492903664
CDC123	WT	0	0	0	0
CDC123	WT	0.8350861393652105	10	0.12416432993331569	0.5431359495398858
CDC123	WT	-0.19588438864675972	60	0.7224199771402741	0.5514353109522215
VPS24	WT	0	0	0	0
VPS24	WT	0.15042039059433826	10	0.47973259704374355	0.21283915131434028
VPS24	WT	0.0265836634349042	60	0.9004924448762939	0.2126024809473861
ALD3	WT	0	0	0	0
ALD3	WT	5.749798085693766	10	2.5566504286406815e-36	0.45688069847538787
ALD3	WT	0.9363090857494012	60	0.05155737170098759	0.48094498206053005
GUF1	WT	0	0	0	0
GUF1	WT	0.3885655262919432	10	0.44709091119970046	0.5110862720727294
GUF1	WT	0.6856549086884245	60	0.17020611884645964	0.499915425790154
VMA5	WT	0	0	0	0
VMA5	WT	-0.8157061361430913	10	6.318477662406779e-5	0.20389646434998876
VMA5	WT	-0.4968894077437438	60	0.01380282842478499	0.20179444946316924
TIM8	WT	0	0	0	0
TIM8	WT	-0.41118648114536527	10	0.22893788938133755	0.3417726824994018
TIM8	WT	-0.1331518542042943	60	0.6933470114774954	0.33767718145046116
RAD6	WT	0	0	0	0
RAD6	WT	0.3112288039321027	10	0.22015236900856203	0.25383162093273637
RAD6	WT	-0.38091324911266017	60	0.1394397623472938	0.25774292646725944
GAA1	WT	0	0	0	0
GAA1	WT	0.1705102705205699	10	0.7066335734444645	0.45302555712360226
GAA1	WT	-0.28225641450847855	60	0.5406836301547733	0.4613694924349722
RRN3	WT	0	0	0	0
RRN3	WT	-1.0220088391798077	10	8.147679006697331e-5	0.259392172274245
RRN3	WT	-0.4297540919851136	60	0.07740045823674228	0.2433526488272705
HXT7	WT	0	0	0	0
HXT7	WT	5.059380657675437	10	2.6065830992567925e-10	0.8004670800675641
HXT7	WT	0.6373909600228297	60	0.43103865107297623	0.8094721597320328
PHO89	WT	0	0	0	0
PHO89	WT	-0.24937792281963597	10	0.7407111911780928	0.7536086814161836
PHO89	WT	-0.6111582492198466	60	0.4225625615754264	0.7620584795234514
RPS21A	WT	0	0	0	0
RPS21A	WT	-2.12954159014384	10	4.614637798787346e-20	0.23216169231135572
RPS21A	WT	-1.1521979368527837	60	5.085236761948416e-7	0.22938128581198602
YGL138C	WT	0	0	0	0
YGL138C	WT	1.7764176454598457	10	0.22102469851468973	1.4515494028884601
YGL138C	WT	0.8453738830052249	60	0.5729053826623379	1.499480696894651
FAU1	WT	0	0	0	0
FAU1	WT	-0.06567304826219589	10	0.8133500918471843	0.27815020063833884
FAU1	WT	0.30684271880497027	60	0.2513350771417698	0.26749136258782724
YER010C	WT	0	0	0	0
YER010C	WT	-0.8101065838171698	10	0.007920261552122644	0.30507315439523797
YER010C	WT	0.2710071790010506	60	0.3141561501038499	0.2692464583232115
SVS1	WT	0	0	0	0
SVS1	WT	-0.5743805244150035	10	0.5054827293510443	0.862578355325645
SVS1	WT	0.1756877921461978	60	0.8364145221850485	0.8508630263824384
MRC1	WT	0	0	0	0
MRC1	WT	-0.6473432251283922	10	0.01544570956427756	0.2673032191390668
MRC1	WT	0.20198050474770424	60	0.4140514726172238	0.24728732398273423
NSA2	WT	0	0	0	0
NSA2	WT	-2.1988167387017925	10	1.3205408526513626e-34	0.1792098610619375
NSA2	WT	-0.6998632993470612	60	2.757203925224079e-6	0.14928428481324035
YCP4	WT	0	0	0	0
YCP4	WT	0.8553539917974474	10	3.114595384520762e-5	0.20537096936435853
YCP4	WT	0.09543283507265149	60	0.6444254866780892	0.20677935818378626
CKB2	WT	0	0	0	0
CKB2	WT	-0.35579630396259565	10	0.07558270417558134	0.20023292378900479
CKB2	WT	-0.40144029062767655	60	0.04345147317795256	0.19879737284692872
YSP3	WT	0	0	0	0
YSP3	WT	0.8474082890202292	10	0.22071221854639392	0.6919672133399103
YSP3	WT	0.9776736444659794	60	0.15287447877510335	0.6839501593984868
CDC3	WT	0	0	0	0
CDC3	WT	-0.8951970439828972	10	8.684703666770656e-4	0.26882821357668685
CDC3	WT	0.014301047512140024	60	0.9567187612977043	0.26350877092749747
YOL071W	WT	0	0	0	0
YOL071W	WT	1.578900842893535	10	2.5213334044481984e-7	0.3062194100515949
YOL071W	WT	1.1122915586405422	60	3.264946819516852e-4	0.3095444920545285
ATO2	WT	0	0	0	0
ATO2	WT	1.4201023009173297	10	0.07366478413104333	0.793934358526825
ATO2	WT	-0.09999862939500488	60	0.9069199507362841	0.8552416505112505
INP53	WT	0	0	0	0
INP53	WT	-0.10386607355471653	10	0.8027276873327694	0.4157660866128238
INP53	WT	-0.17406572631904066	60	0.6749225959233365	0.4150334495107887
FSH1	WT	0	0	0	0
FSH1	WT	1.5342256237323646	10	1.1870840829095987e-11	0.22622774514449503
FSH1	WT	0.3413517668328657	60	0.1361923496250762	0.2290764994996271
YIL152W	WT	0	0	0	0
YIL152W	WT	0.998328097959447	10	0.06428915112835745	0.5395874279044509
YIL152W	WT	0.7212221176259671	60	0.18583913281169442	0.5451460869443929
UPF3	WT	0	0	0	0
UPF3	WT	-0.30467034530342374	10	0.28756431258426024	0.28648431008993536
UPF3	WT	0.23789414736157968	60	0.37917003279280587	0.27051053081686793
1	WT	0	0	0	0
1	WT	-0.46856592391225627	10	0.004317599273217448	0.16418013510521356
1	WT	-0.16632645449775574	60	0.30668197361320815	0.16271276047213293
RTS2	WT	0	0	0	0
RTS2	WT	0.47207434916875357	10	0.2768929814958661	0.43416101965695675
RTS2	WT	0.48520398190621117	60	0.25835243904444255	0.42927243749765503
PTC1	WT	0	0	0	0
PTC1	WT	0.47172208544523786	10	0.0844805363712568	0.27342078745044346
PTC1	WT	0.3883153970537613	60	0.1539106968298765	0.2723389577987138
DLT1	WT	0	0	0	0
DLT1	WT	-0.08030323037095007	10	0.9131818172367081	0.7365507586319333
DLT1	WT	-0.29385147977719567	60	0.6945443862649908	0.7482934518802504
YDR344C	WT	0	0	0	0
YDR344C	WT	1.9644406233050442	10	0.31752857324211303	1.9653260053024117
YDR344C	WT	1.2411691925987736	60	0.5385166764218834	2.0179722615179574
YRB30	WT	0	0	0	0
YRB30	WT	-0.015363528104844362	10	0.95350321326554	0.26348873181563826
YRB30	WT	-0.14839351696454564	60	0.5735062348244631	0.2636254697208677
MPC3	WT	0	0	0	0
MPC3	WT	3.693170664178016	10	9.69701085381245e-16	0.4598853078700527
MPC3	WT	0.5893155134930992	60	0.2522446281373132	0.5147245294114128
COX26	WT	0	0	0	0
COX26	WT	5.238976427758032	10	5.225830840031103e-20	0.5719873700147468
COX26	WT	1.9389118413387858	60	0.0016535559631582015	0.6162532522684534
MPC1	WT	0	0	0	0
MPC1	WT	1.3071722743015122	10	1.4842283020388435e-7	0.24877170861154005
MPC1	WT	0.6885362135366782	60	0.0070452226373343115	0.25551506634703786
SEN2	WT	0	0	0	0
SEN2	WT	-1.6246090494681114	10	0.0012922978723388095	0.5049000119612261
SEN2	WT	-0.12694272028423628	60	0.7615860616155566	0.4184023669314353
YMR262W	WT	0	0	0	0
YMR262W	WT	1.387241879966634	10	1.4474139544055667e-05	0.3198958278182406
YMR262W	WT	0.39790902310346804	60	0.2369783789971054	0.33647731657375346
HIF1	WT	0	0	0	0
HIF1	WT	-2.113739245489386	10	4.7651272521366365e-12	0.305789365470052
HIF1	WT	-0.3888008853077415	60	0.14127698814065073	0.264301207792665
YOR020W-A	WT	0	0	0	0
YOR020W-A	WT	0.817885857226323	10	0.03516060035886099	0.3882669468606845
YOR020W-A	WT	-0.16020669363657858	60	0.6956766216945112	0.4095648603633152
STE12	WT	0	0	0	0
STE12	WT	-1.9114165557888803	10	1.4706636706314608e-6	0.39695630757838535
STE12	WT	-0.6942692389318469	60	0.0497635208889376	0.35385952581445596
YDL124W	WT	0	0	0	0
YDL124W	WT	2.566615990502409	10	5.8164633291332036e-30	0.2257114520237367
YDL124W	WT	0.09970041122492554	60	0.6647714900081213	0.23007704225187464
GPM2	WT	0	0	0	0
GPM2	WT	4.283748563463522	10	9.206000458494763e-40	0.32461556012817244
GPM2	WT	3.238713511042022	60	6.692765273978638e-23	0.32872336889964426
GSH2	WT	0	0	0	0
GSH2	WT	-1.0742931379391862	10	5.029148741354863e-8	0.197107996497415
GSH2	WT	-0.3910598337572116	60	0.033652572760354604	0.1840965824910071
HCS1	WT	0	0	0	0
HCS1	WT	0.4456913375994669	10	0.3401234153622839	0.4672201755208921
HCS1	WT	-1.0004659167164136	60	0.039420505733408454	0.48571722766026076
JEN1	WT	0	0	0	0
JEN1	WT	-1.1684076952348879	10	0.1296888679700201	0.7710582749623058
JEN1	WT	-1.05661197299001	60	0.16226866685355346	0.7560826905011787
PYC2	WT	0	0	0	0
PYC2	WT	-1.6271485542033495	10	9.171471644616668e-15	0.20994798868334646
PYC2	WT	-0.4929059814507079	60	0.014586883462669913	0.20180583208379083
SSK22	WT	0	0	0	0
SSK22	WT	-0.17202878875915503	10	0.8356377216756666	0.8291481946980067
SSK22	WT	-0.2259658959446078	60	0.7845905562953437	0.8266791649766996
PXA2	WT	0	0	0	0
PXA2	WT	0.4854864074409344	10	0.40605798524810754	0.58432449522134855
PXA2	WT	-1.0917444779226244	60	0.10521389033741854	0.6738807370147635
DJP1	WT	0	0	0	0
DJP1	WT	-0.6805836815140883	10	0.00264432679659638	0.22638449456956958
DJP1	WT	0.03612203884004846	60	0.8648097211657186	0.2121645280193912
PGI1	WT	0	0	0	0
PGI1	WT	0.2772721830192885	10	0.13641716925011255	0.18618034942434714
PGI1	WT	-0.5064551368344922	60	0.0065670484920486395	0.18633121193364025
LSO1	WT	0	0	0	0
LSO1	WT	1.3679805555465054	10	0.06190678136844243	0.7327304793994507
LSO1	WT	0.2847111899725368	60	0.7071400834964108	0.7578156464773794
FLO9	WT	0	0	0	0
FLO9	WT	0.14506038292627768	10	0.8713567610411806	0.8957919226066475
FLO9	WT	-1.5117442289455965	60	0.14742179129690924	1.0435188537034963
RET3	WT	0	0	0	0
RET3	WT	-0.19245838311994812	10	0.3869478260311998	0.2224526169069626
RET3	WT	-0.029413648584422154	60	0.893835847563409	0.22040604513864626
XDJ1	WT	0	0	0	0
XDJ1	WT	-1.24860437090557	10	3.09291109961361e-4	0.34612391235794693
XDJ1	WT	-0.3877508866524778	60	0.22734063674547714	0.3211885317812594
CCA1	WT	0	0	0	0
CCA1	WT	-1.0051330861716494	10	1.3895707656095262e-5	0.23130421510762406
CCA1	WT	-0.15425439031702615	60	0.46886808651399275	0.21296384036768623
YDR526C	WT	0	0	0	0
YDR526C	WT	2.015960563582924	10	0.40797833572745656	2.4363340248020413
YDR526C	WT	-2.629933135284856	60	0.3438375601243524	2.7782647660479434
AIM7	WT	0	0	0	0
AIM7	WT	1.1186255710982784	10	2.9228821298488252e-5	0.26765264082581436
AIM7	WT	0.08978777846643497	60	0.7489010795646107	0.2805090403148333
MLH1	WT	0	0	0	0
MLH1	WT	-0.1899727657683314	10	0.575957645580858	0.3396622375000547
MLH1	WT	0.22842735189920377	60	0.48111186933873246	0.32423330303401265
PAD1	WT	0	0	0	0
PAD1	WT	-0.12002882959128	10	0.755594612110942	0.38560877770682583
PAD1	WT	-0.2922438886303666	60	0.45158465868284126	0.38822169014575264
VAM7	WT	0	0	0	0
VAM7	WT	0.31424319751711394	10	0.28918160787994557	0.29647859860186787
VAM7	WT	0.27133738145365	60	0.35666432456639074	0.2943752529655557
POP4	WT	0	0	0	0
POP4	WT	0.0040799268675837125	10	0.993879341336188	0.531851048777699
POP4	WT	-0.9535358319794645	60	0.0797992714523403	0.544301612314384
YJU3	WT	0	0	0	0
YJU3	WT	0.6158945509031614	10	0.010301165336129956	0.24006313216097822
YJU3	WT	0.25670113416261614	60	0.28854075666090395	0.24186780748279404
IRC10	WT	0	0	0	0
IRC10	WT	-0.12883288567357798	10	0.9038093323446477	1.0660504288406067
IRC10	WT	-0.07273500938740468	60	0.9447720052823435	1.0499703814257915
SEC39	WT	0	0	0	0
SEC39	WT	-0.5950213420697085	10	0.3804954460023932	0.6784861396013936
SEC39	WT	0.33483433561240694	60	0.617056098427493	0.6696325726440551
YCR049C	WT	0	0	0	0
YCR049C	WT	1.2615530175200242	10	0.5597783946187137	2.1632654411477104
YCR049C	WT	4.032949842573817	60	0.049913271878061424	2.056886060551776
YGL117W	WT	0	0	0	0
YGL117W	WT	0.8119926635151863	10	0.16012152258981044	0.5780693888394747
YGL117W	WT	1.5640612424706044	60	0.004027115439856958	0.543826486138056
YMR160W	WT	0	0	0	0
YMR160W	WT	1.1959333809460748	10	8.795753409007725e-6	0.269061098482816
YMR160W	WT	-0.06327101812171146	60	0.8325917230100355	0.2993253233372073
CIA1	WT	0	0	0	0
CIA1	WT	-1.3278690544539793	10	2.0761782864634547e-7	0.255733967827847
CIA1	WT	-0.566597094705286	60	0.014781051273337769	0.23243105648254384
SEG1	WT	0	0	0	0
SEG1	WT	0.748879193636885	10	0.018139860956388948	0.31695224989795784
SEG1	WT	-0.01910901465823372	60	0.9526568380547615	0.32185926516998886
DOT1	WT	0	0	0	0
DOT1	WT	-0.17841512658383074	10	0.6572722172727254	0.4021235100620586
DOT1	WT	0.3972856579947943	60	0.3027589803059104	0.3855140276383653
ALR2	WT	0	0	0	0
ALR2	WT	-0.4020849165098316	10	0.5994051253563992	0.7655025167845592
ALR2	WT	-0.6541317663431384	60	0.3970008252606225	0.7723018528627427
AIM24	WT	0	0	0	0
AIM24	WT	0.7189344466490932	10	0.019796581673762966	0.3085315763101916
AIM24	WT	0.10087877310851696	60	0.7505875421185775	0.31736383859391626
PEP5	WT	0	0	0	0
PEP5	WT	-0.092469713433636	10	0.7173277420850745	0.2554182643851051
PEP5	WT	-0.10212316195008049	60	0.6864872539846967	0.2530138957733443
PIR5	WT	0	0	0	0
PIR5	WT	-0.5291462096832013	10	0.6054855567151853	1.0244285246193348
PIR5	WT	-0.6140733153503661	60	0.5462645813833431	1.0177443119425733
ERV25	WT	0	0	0	0
ERV25	WT	0.2957230527994961	10	0.3717757623238824	0.33110046493118384
ERV25	WT	0.1755658538428733	60	0.595704989268746	0.33088983664302646
EGD1	WT	0	0	0	0
EGD1	WT	-0.558762423900413	10	0.0010450916515990611	0.1704532479907689
EGD1	WT	-0.6248358200901767	60	2.423403738140484e-4	0.1702447165688578
YBR206W	WT	0	0	0	0
YBR206W	WT	-1.123497005999907	10	0.21539949444320722	0.9068839564970933
YBR206W	WT	-0.2519369150217901	60	0.7615625243665859	0.8302978734990154
MGT1	WT	0	0	0	0
MGT1	WT	0.8974963652336605	10	0.00912209493474842	0.344205402798833
MGT1	WT	1.0850901127364243	60	0.0012563586302928298	0.33638211374764143
TWF1	WT	0	0	0	0
TWF1	WT	1.1908974305248914	10	7.404044131799204e-8	0.22131198902696717
TWF1	WT	0.3745435996717589	60	0.10118138548853349	0.2284982453807284
SMB1	WT	0	0	0	0
SMB1	WT	0.019197738646381135	10	0.948337127933241	0.29628371715992313
SMB1	WT	-0.39284398362242545	60	0.19042640555319632	0.3000369373342232
SYS1	WT	0	0	0	0
SYS1	WT	0.2843022062767189	10	0.5215738084729017	0.44358363646106974
SYS1	WT	-0.35974035910846053	60	0.4325931664105577	0.4584069978163696
MRF1	WT	0	0	0	0
MRF1	WT	0.15389378646675594	10	0.6895767995492985	0.38528402799855366
MRF1	WT	-0.134305113096911	60	0.7302770799939053	0.38956459839026725
YPT35	WT	0	0	0	0
YPT35	WT	0.4036298828476777	10	0.3398047559870875	0.4228478524962079
YPT35	WT	-0.71392412152155	60	0.12226749897433642	0.4619894146164429
FMP23	WT	0	0	0	0
FMP23	WT	0.5682817501479767	10	0.1826862000772983	0.42646836690844603
FMP23	WT	0.733853991928276	60	0.07855059347070488	0.41716195458578903
FMP40	WT	0	0	0	0
FMP40	WT	0.3449256321630531	10	0.4711044612472052	0.4786092420042302
FMP40	WT	0.5860553243110562	60	0.21269676328336296	0.4702798391258873
PUN1	WT	0	0	0	0
PUN1	WT	1.1509988922210348	10	0.12852496205757172	0.7572638368470502
PUN1	WT	0.5335530484427559	60	0.4848915034043386	0.7639026104134996
YMR245W	WT	0	0	0	0
YMR245W	WT	-0.20927135975017175	10	0.8736619622670954	1.316099460316579
YMR245W	WT	-1.4352464660500268	60	0.30059373764844366	1.386495909660052
PER1	WT	0	0	0	0
PER1	WT	0.3964948085633644	10	0.47819810284585523	0.5590704492537187
PER1	WT	-0.19843520568260606	60	0.7291192843229255	0.5730197596547465
STO1	WT	0	0	0	0
STO1	WT	-0.875320551769635	10	1.1444498293877149e-4	0.2269004203504378
STO1	WT	-0.5223652463199085	60	0.01893734535380613	0.2225897809547776
LYS5	WT	0	0	0	0
LYS5	WT	0.846023390532834	10	0.12425543022955991	0.5503827232770666
LYS5	WT	0.9634654051467155	60	0.07451380524501908	0.540226983143634
YBL010C	WT	0	0	0	0
YBL010C	WT	-0.1635850703485439	10	0.6559527529821115	0.3671878116072204
YBL010C	WT	0.24672905591732983	60	0.4842305449345817	0.35271470498406227
ECM22	WT	0	0	0	0
ECM22	WT	1.2285907793373747	10	0.4267986884822886	1.5460162247790967
ECM22	WT	9.143178130175706	60	3.1485606418195e-9	1.54350177397123
LAA1	WT	0	0	0	0
LAA1	WT	-0.12135850183186775	10	0.6514453461105275	0.26863775221725084
LAA1	WT	-0.6130276785788207	60	0.024604908301191962	0.27275376242994176
NVJ1	WT	0	0	0	0
NVJ1	WT	1.9377130546518468	10	2.5033454087903596e-5	0.45977317468990525
NVJ1	WT	-0.24973768199437674	60	0.6227223551461258	0.5076013098224905
DUG1	WT	0	0	0	0
DUG1	WT	0.19888218982524605	10	0.33995803949616776	0.20841768123440452
DUG1	WT	-0.07282255585914592	60	0.7269502166528754	0.20854990201928894
YVC1	WT	0	0	0	0
YVC1	WT	0.62309819653497	10	0.2568008026738657	0.549476534121195
YVC1	WT	-0.33768313595981825	60	0.5480236666945177	0.562126695831331
RTK1	WT	0	0	0	0
RTK1	WT	0.7495137347509612	10	0.03392673748133505	0.35338729717877276
RTK1	WT	0.08640545613655452	60	0.8136058854449825	0.3664714368690701
PRP2	WT	0	0	0	0
PRP2	WT	-0.03899599384233927	10	0.8815623403467026	0.26173746367009854
PRP2	WT	0.012465738722669626	60	0.9614946592738914	0.2582072488006403
YHC1	WT	0	0	0	0
YHC1	WT	0.18195174443947404	10	0.5599456631619211	0.3121372609830751
YHC1	WT	0.040940403391317326	60	0.8958464520122451	0.3127368640677379
SHU2	WT	0	0	0	0
SHU2	WT	0.1049857162410293	10	0.8585686102231254	0.5891568024633752
SHU2	WT	-0.26436544223884456	60	0.6596687729309347	0.6003250226061764
TRR2	WT	0	0	0	0
TRR2	WT	0.17809767160588802	10	0.6129540214613928	0.35206818842515364
TRR2	WT	0.5706217283709606	60	0.08789793687091767	0.33436332234367655
YDR022C	WT	0	0	0	0
YDR022C	WT	1.422012789193634	10	7.488222819989914e-4	0.4218308038048027
YDR022C	WT	1.4242812794030935	60	6.628099795797513e-4	0.41835037833750366
YJR079W	WT	0	0	0	0
YJR079W	WT	-0.15893244110827895	10	0.888862825138953	1.1373171932092547
YJR079W	WT	-1.6476230906373501	60	0.17061969137030597	1.2024555873561698
PSD2	WT	0	0	0	0
PSD2	WT	-0.08735946740947452	10	0.8010927513220207	0.34675656762378965
PSD2	WT	-0.2822038524382509	60	0.4169345572611247	0.34764832166573895
YGL159W	WT	0	0	0	0
YGL159W	WT	0.31528618567127575	10	0.3059922864103769	0.307996633211965
YGL159W	WT	-0.13790482558306877	60	0.6621732340352375	0.3156333163581484
MLP1	WT	0	0	0	0
MLP1	WT	-0.8142382032842657	10	1.4057477246167986e-6	0.1687824359551869
MLP1	WT	0.05312613095091402	60	0.7355127073059123	0.15727021904655294
DLD1	WT	0	0	0	0
DLD1	WT	0.8856421576801828	10	0.016072052167734805	0.3679023262275753
DLD1	WT	0.2331066461779016	60	0.5328280315412213	0.3737511393102244
PIL1	WT	0	0	0	0
PIL1	WT	1.4348623019853675	10	1.5427605471401855e-10	0.22415921205964084
PIL1	WT	-0.23602288314666575	60	0.2949122389138327	0.22534033719186508
OPI6	WT	0	0	0	0
OPI6	WT	1.4998188523278786	10	0.39904723796591723	1.778460912073483
OPI6	WT	-0.39855477130188566	60	0.8480460565517313	2.080008268198012
FKH2	WT	0	0	0	0
FKH2	WT	-0.45064061602002564	10	0.5760965788921206	0.8060173176100381
FKH2	WT	0.5400971401102259	60	0.49826971431959416	0.797527143114191
HSK3	WT	0	0	0	0
HSK3	WT	0.39766475646327337	10	0.15227656495899047	0.2777887996651544
HSK3	WT	0.4120293024192621	60	0.13372730927753204	0.27476601779264287
PRM3	WT	0	0	0	0
PRM3	WT	0.14067611002002134	10	0.9221923663939829	1.4402839532000271
PRM3	WT	-0.0393636341283469	60	0.9784503989816743	1.4572806699540837
ARK1	WT	0	0	0	0
ARK1	WT	0.4639948704223207	10	0.2169858637163268	0.3758313505035773
ARK1	WT	0.41011305957903627	60	0.2722005496119052	0.3735060926385484
YGR210C	WT	0	0	0	0
YGR210C	WT	0.10707468916768573	10	0.5688138756160099	0.1879165202555852
YGR210C	WT	-0.3005465150487298	60	0.11410685159669562	0.19021930550008345
PEX25	WT	0	0	0	0
PEX25	WT	-0.43628552229541656	10	0.12084118904271288	0.2812472675187804
PEX25	WT	-0.23741120325559883	60	0.3862162678962246	0.27398883321436973
GAS2	WT	0	0	0	0
GAS2	WT	-0.1803212436057369	10	0.8634675599054027	1.0486122061393064
GAS2	WT	-1.483435471045457	60	0.19802762867774334	1.1524592369748958
SCP1	WT	0	0	0	0
SCP1	WT	0.18425379279000728	10	0.4283534673664578	0.2326400461736222
SCP1	WT	0.32769342403745205	60	0.15082138035875023	0.22809770122366926
YIL102C-A	WT	0	0	0	0
YIL102C-A	WT	0.2774032434932448	10	0.738932077704934	0.8323731581426123
YIL102C-A	WT	0.7120799066186729	60	0.3676228802679524	0.7903787798853374
FRS2	WT	0	0	0	0
FRS2	WT	-1.4185317171217207	10	1.219038701853385e-12	0.1997032905196437
FRS2	WT	-0.3838171157128829	60	0.04879527260635141	0.19479382575122825
YER079W	WT	0	0	0	0
YER079W	WT	3.5314583758824942	10	2.4989003354214037e-32	0.2983289198486972
YER079W	WT	1.2967783310695957	60	7.951532615599941e-5	0.32864307890645483
CNA1	WT	0	0	0	0
CNA1	WT	3.1973686451593175	10	1.0758553265230977e-5	0.7264538353261021
CNA1	WT	0.5475877457349545	60	0.4527920790139938	0.7293697773456459
CYS4	WT	0	0	0	0
CYS4	WT	-0.23847665656677033	10	0.24299462449906997	0.20425664247554357
CYS4	WT	-0.7168025139624733	60	4.5671644302456226e-4	0.20451227652509435
2	WT	0	0	0	0
2	WT	1.3465447926775451	10	0.10097216467104382	0.8209844302690954
2	WT	0.0966946115459578	60	0.907421456724748	0.8314841853426918
SHE4	WT	0	0	0	0
SHE4	WT	1.2120696670357147	10	1.9551253326841406e-8	0.21582722178923403
SHE4	WT	0.1535890750685049	60	0.5078965066102908	0.2319668139858675
DBF2	WT	0	0	0	0
DBF2	WT	0.8047190391906546	10	4.775905095935748e-4	0.23037915893981095
DBF2	WT	0.08356386638643476	60	0.7259872976642399	0.23843489741647622
YOL159C-A	WT	0	0	0	0
YOL159C-A	WT	0.4703138432148882	10	0.3929103085662958	0.5504922638635759
YOL159C-A	WT	0.8025084958569917	60	0.13132309981927687	0.5318483103675715
CSR1	WT	0	0	0	0
CSR1	WT	-0.15502083254473745	10	0.55525668396932	0.26279104358594785
CSR1	WT	0.013030890031371874	60	0.9601180191674675	0.26058922558741443
ATG41	WT	0	0	0	0
ATG41	WT	5.278048972596333	10	1.3884331088869128e-112	0.23407515689279615
ATG41	WT	0.8460798272601826	60	7.406984304716032e-4	0.2507606084030257
YPL142C	WT	0	0	0	0
YPL142C	WT	10.772934220413308	10	7.683231172445993e-4	3.202454846770706
YPL142C	WT	1.9847350199709655	60	0.5493045019043794	3.314506130577915
YHL002C-A	WT	0	0	0	0
YHL002C-A	WT	0.3088263718685202	10	0.8597284654162598	1.747547941596641
YHL002C-A	WT	-0.18357749318851335	60	0.9186729641477097	1.797920368228748
MRM2	WT	0	0	0	0
MRM2	WT	0.6028618950140399	10	0.3541966509736335	0.6507015545387597
MRM2	WT	0.06676502306208823	60	0.9200643153263225	0.665303664902018
YOL131W	WT	0	0	0	0
YOL131W	WT	0.9865453008868957	10	0.28266811866118136	0.9182761341581853
YOL131W	WT	0.5080229310455804	60	0.5901624778844978	0.9432275735944466
PRY1	WT	0	0	0	0
PRY1	WT	-0.7391587000107541	10	0.013571280684999068	0.2994466663810635
PRY1	WT	-0.390449406822196	60	0.17721304675967	0.2893534060928988
RPS10A	WT	0	0	0	0
RPS10A	WT	-1.790047160292263	10	1.0656603406839564e-14	0.23153650855132082
RPS10A	WT	-0.9946733437244094	60	1.5128189774240913e-5	0.22988587955178288
BUL2	WT	0	0	0	0
BUL2	WT	-0.7420692558552244	10	0.010928212854894898	0.2915808826446883
BUL2	WT	-0.23157078518042634	60	0.4045565499838012	0.27782568217919806
PHR1	WT	0	0	0	0
PHR1	WT	2.5744910299140176	10	1.0639653876800175e-17	0.3005194185808377
PHR1	WT	0.6160425426030374	60	0.06801958235954197	0.33758029683793606
YDR249C	WT	0	0	0	0
YDR249C	WT	-0.7608796747658454	10	0.21782320921125628	0.6174282282253273
YDR249C	WT	-0.7294007343506056	60	0.22820536543391484	0.6053144978868538
GEX1	WT	0	0	0	0
GEX1	WT	0.5791616005700349	10	0.5614582516018853	0.9973905071303126
GEX1	WT	-0.4850447364281205	60	0.6636513687669191	1.1153595429688536
TIM50	WT	0	0	0	0
TIM50	WT	-0.3449423409894511	10	0.32124506375723644	0.34775829545554426
TIM50	WT	-0.1952968495360932	60	0.5709787912282884	0.3446756193108966
SHE3	WT	0	0	0	0
SHE3	WT	0.02075156807531236	10	0.9422214285439203	0.2863149884783661
SHE3	WT	0.003230674890176127	60	0.9909387208719774	0.28446869024047317
YMR279C	WT	0	0	0	0
YMR279C	WT	0.3788600033083685	10	0.7415754535609972	1.1488691592490232
YMR279C	WT	0.4563397554181817	60	0.6868255625571218	1.1318883857993496
TRM5	WT	0	0	0	0
TRM5	WT	-3.06861836746231	10	3.380898688565685e-20	0.3333233219515964
TRM5	WT	-0.5690912585617626	60	0.014103504645985827	0.2318453050697095
SEC53	WT	0	0	0	0
SEC53	WT	-1.9393826216822991	10	1.4110839326674798e-16	0.23468415342219373
SEC53	WT	-0.3275975446630064	60	0.15481828934569408	0.23026196164988835
RSF1	WT	0	0	0	0
RSF1	WT	1.4957809016452492	10	0.005840988305958899	0.5426225991049279
RSF1	WT	0.3743237421225711	60	0.5180798423941151	0.5791722885972642
SCS7	WT	0	0	0	0
SCS7	WT	0.14660769760042217	10	0.7433388643934882	0.44774589683533006
SCS7	WT	0.2486729892198719	60	0.5759189794751779	0.4445703928625276
GAD1	WT	0	0	0	0
GAD1	WT	5.574889885949558	10	8.057218848457695e-108	0.2527411838671087
GAD1	WT	1.8210107145870806	60	2.385647677313003e-11	0.27259693926122025
GIC2	WT	0	0	0	0
GIC2	WT	-0.5325146181970837	10	0.026543381119160315	0.2400695633007872
GIC2	WT	0.32469007534419925	60	0.15150307231211602	0.22638436319835048
YGR018C	WT	0	0	0	0
YGR018C	WT	0.9800242529057009	10	0.5681508177346564	1.7170002613855702
YGR018C	WT	0.08040932921643335	60	0.964593526114619	1.8114285738719127
ISD11	WT	0	0	0	0
ISD11	WT	-0.09924363497931724	10	0.7466403037571698	0.30718684442005134
ISD11	WT	0.08280533171793979	60	0.7836594933687084	0.30160026887676583
AIM20	WT	0	0	0	0
AIM20	WT	-0.9116155388413502	10	0.07808690099106254	0.5174060398336284
AIM20	WT	-0.7730948990792044	60	0.12276290833880837	0.5009428043956068
YCR090C	WT	0	0	0	0
YCR090C	WT	-0.2882301927297126	10	0.21032551986990125	0.23009252068526845
YCR090C	WT	0.0671831859288427	60	0.7622871406335694	0.22210878927683553
SPT4	WT	0	0	0	0
SPT4	WT	-0.9714246859304488	10	3.972904120136695e-4	0.2742683149561845
SPT4	WT	-0.501094527218809	60	0.058308114202355786	0.26465687966464063
TAL1	WT	0	0	0	0
TAL1	WT	-0.1341809429985124	10	0.5408393921902087	0.21941333369167443
TAL1	WT	-0.40083472548622834	60	0.06781153317751752	0.2194842718132603
CTS2	WT	0	0	0	0
CTS2	WT	0.8031303037922742	10	0.07338504975209635	0.44856876292711034
CTS2	WT	0.8146889855787467	60	0.06683223346580869	0.4445049811748899
YLL056C	WT	0	0	0	0
YLL056C	WT	-2.039143754726459	10	0.05110111880820899	1.0453772023388583
YLL056C	WT	-2.282462621737416	60	0.029762151422450214	1.0502572768087437
MUK1	WT	0	0	0	0
MUK1	WT	0.6377779558739797	10	0.042052507605947774	0.3137126945726424
MUK1	WT	0.10183434443301725	60	0.7537225771885542	0.32458748991246267
ACT1	WT	0	0	0	0
[truncated: 72,539 more rows]
