# Supplementary material for: Nuclear and cytosolic J-domain proteins provide synergistic control of Hsf1 at distinct phases of the heat shock response
Source: bioRxiv preprint, doi:10.1101/2025.04.14.648540, version 2 (2025-07-08)
Supplement: RH_Table_S6_DeSeq2_log2fc_steadystate [file 648540_file06.xlsx]

## Sheet: Sheet 1 - DeSeq2_log2fc_steadys
DeSeq2_log2fc_steadystate
genes	strain	log2FC	pvalue	lfcSE	stat	padj
YBR230W-A	apj1d	0.1695769014505076	0.5786847101168233	0.30537506221691596	0.5553069730692438	0.9997008385809374
YBR230W-A	sis14xcga	0.13015270977876903	0.7115898078723714	0.3520287947933037	0.3697217719226325	0.9872814001744901
YBR230W-A	ydj14xcga	0.28482114355090626	0.35098594493593405	0.3053797396925381	0.9326785851532566	NA
YBR230W-A	apj1dsis14x	0.040937031809757114	0.8975866226975386	0.31805478183304003	0.1287106314636283	NA
YBR230W-A	apj1dydj14x	0.45015858572622325	0.13586663934869128	0.3018440660103995	1.491361389594831	0.5915579668671979
HRT3	apj1d	-0.13061053739250109	0.7254223741178489	0.37187539148175147	-0.35122124341725997	0.9997008385809374
HRT3	sis14xcga	1.013860379086348	0.012332072347661127	0.40513952285425264	2.5024968483538457	0.7972232508650235
HRT3	ydj14xcga	0.5132193309347969	0.16138673850486177	0.3664745541694921	1.4004228263483645	NA
HRT3	apj1dsis14x	-0.03614989717237191	0.9237320256343474	0.37760865466009674	-0.09573376225953328	0.9995467300026422
HRT3	apj1dydj14x	0.32795125394256236	0.3717668145753325	0.3671772627823378	0.8931687421423243	0.8419800345553775
PRM4	apj1d	-0.14972738464881988	0.7698104329154369	0.5116735613566104	-0.29262286730595316	0.9997008385809374
PRM4	sis14xcga	-0.4268877828790635	0.4613361176534594	0.5794999494041598	-0.7366485248497231	0.9792828732932796
PRM4	ydj14xcga	-0.7930758722039469	0.1250224171195864	0.5169887003678044	-1.534029412325113	NA
PRM4	apj1dsis14x	0.05816214047309679	0.9096450029814641	0.5125035086354417	0.11348632642136539	0.9995467300026422
PRM4	apj1dydj14x	-0.8614992540636623	0.09578146805650319	0.5172124389476276	-1.6656584203901887	0.5070165530503021
TIM21	apj1d	-0.028750207600951285	0.8712085298458412	0.1773351281564109	-0.16212358994994713	0.9997008385809374
TIM21	sis14xcga	-0.15296614000834652	0.452369947307008	0.20355592812546666	-0.7514698364081154	0.9792828732932796
TIM21	ydj14xcga	-0.1491449379781381	0.40435680033383303	0.17885971340682733	-0.8338654643759763	0.8065199966221102
TIM21	apj1dsis14x	-0.05096497585998324	0.7788114457558404	0.1814550914947149	-0.28086826024095146	0.9995467300026422
TIM21	apj1dydj14x	0.03190826309540315	0.8569899802365893	0.1770644002986381	0.1802071056722099	0.9781105264839408
RMD5	apj1d	-0.1546633795683564	0.6489007825515699	0.3397031706267622	-0.45528977337184695	0.9997008385809374
RMD5	sis14xcga	0.46920684083275416	0.21104233173915177	0.3751540552990712	1.250704435165187	0.9792828732932796
RMD5	ydj14xcga	-0.012143905732737634	0.9714351920018299	0.3391363456670312	-0.035808328679287856	NA
RMD5	apj1dsis14x	0.4590433784535311	0.175347586156085	0.33872249323191816	1.3552196491988828	NA
RMD5	apj1dydj14x	0.48672515835376107	0.13984384172485972	0.3296763255775368	1.4763727953504138	0.601921658060428
CCC1	apj1d	0.004238023788220662	0.9830433425790769	0.1994024592204262	0.02125361845981953	0.9997008385809374
CCC1	sis14xcga	0.061800822351826885	0.7837152980101795	0.22515550735543444	0.2744806159871854	0.988251993958159
CCC1	ydj14xcga	0.12845107441668852	0.5198434924350341	0.19958628599268974	0.6435866761977489	0.8778374086791865
CCC1	apj1dsis14x	0.18934987776219078	0.34706822808867976	0.20137366380362312	0.9402911690917152	0.9995467300026422
CCC1	apj1dydj14x	0.353043875849667	0.07491671050860832	0.1982307943001154	1.780973925348699	0.4518119786902013
NHP10	apj1d	0.18455505343036605	0.27812104695152423	0.17016741272041058	1.0845499175191358	0.9997008385809374
NHP10	sis14xcga	0.13445740486240254	0.4896213186086937	0.19460879485759766	0.6909112456134879	0.9816226614664663
NHP10	ydj14xcga	0.22257601566273835	0.19230084075296525	0.17071294998922287	1.303802761751757	0.601865771085157
NHP10	apj1dsis14x	0.2570649128379972	0.1390324710164476	0.17376252696404657	1.4794036282125826	0.9995467300026422
NHP10	apj1dydj14x	0.1484072832729487	0.3841054795131626	0.1705131658004018	0.8703567409373557	0.8468216953656741
ILV1	apj1d	-0.10702376892963732	0.6564389055502389	0.24059198995827474	-0.44483512916701085	0.9997008385809374
ILV1	sis14xcga	0.1011845728252087	0.7068148653312455	0.269009713233947	0.37613724652839026	0.9861578136195257
ILV1	ydj14xcga	0.023875316082178386	0.9208959601883887	0.24042365576479355	0.09930518694689347	0.990764062766344
ILV1	apj1dsis14x	0.07804798868714047	0.7458026424857378	0.24075596406421743	0.3241788380632703	0.9995467300026422
ILV1	apj1dydj14x	-0.24376927086792285	0.3109945143333963	0.2406082924157802	-1.01313744601404	0.7989863934456339
PTK1	apj1d	0.2942714578805191	0.15429856751190224	0.20657715696774795	1.4245111231076848	0.9997008385809374
PTK1	sis14xcga	0.3235039649365789	0.1691932191528732	0.2353097058467849	1.3748007706372263	0.9792828732932796
PTK1	ydj14xcga	0.03886073618497245	0.8532809812691262	0.21013325835973853	0.18493377244664738	NA
PTK1	apj1dsis14x	0.345865013072844	0.10226975322771928	0.21167442075016935	1.633948078596867	0.9995467300026422
PTK1	apj1dydj14x	0.07006827149433038	0.7372054838166326	0.2088122674108132	0.33555629831114964	0.9599413141975147
YOL046C	apj1d	-0.38831020387175275	0.7621968457886419	1.2832577406250691	-0.30259720364718673	NA
YOL046C	sis14xcga	2.4445896851488698	0.0771436315061755	1.3830734181046065	1.7675053638866025	0.9792828732932796
YOL046C	ydj14xcga	0.39986898659940084	0.7526617335032082	1.2688952215965768	0.31513160408648166	NA
YOL046C	apj1dsis14x	-0.16144711577405152	0.9009728959788129	1.297468138874686	-0.1244324318546096	NA
YOL046C	apj1dydj14x	0.29320362558156654	0.8171377784049279	1.2680289094179837	0.23122787138673748	NA
YBR116C	apj1d	0.6136991035513361	0.583080438243128	1.118071533711016	0.5488907328803854	NA
YBR116C	sis14xcga	1.6121850570080725	0.17297414962783525	1.1830733611450879	1.362709287484633	0.9792828732932796
YBR116C	ydj14xcga	1.6001093557718038	0.13445391879956198	1.069043779272246	1.4967669115114086	NA
YBR116C	apj1dsis14x	0.8931663760435914	0.4334177016234476	1.1401784477918397	0.7833566559457148	NA
YBR116C	apj1dydj14x	1.6064020232256335	0.1314244737792326	1.0648943599544483	1.5085083400144488	NA
OSH6	apj1d	-0.07608032088819516	0.6831196442001166	0.18637553142678656	-0.40820981330417616	0.9997008385809374
OSH6	sis14xcga	-0.02312521732020382	0.9124542319522037	0.21033740183870644	-0.10994343905577471	0.9968228537734142
OSH6	ydj14xcga	-0.46460245053307836	0.013812992052032812	0.18870244849383075	-2.462090207315289	0.13892763130752758
OSH6	apj1dsis14x	0.05982080167857033	0.7505342355803312	0.18815418207916648	0.3179350095625328	0.9995467300026422
OSH6	apj1dydj14x	-0.3050379294546498	0.10347955947351957	0.18734513201162128	-1.6282138008033635	0.5251178361925017
YML053C	apj1d	0.031499667244846576	0.9050607500695238	0.26410190154215674	0.11927088393121056	0.9997008385809374
YML053C	sis14xcga	-0.1785149263152692	0.5610303511177279	0.3070898204814233	-0.5813117674672907	0.9838668840705705
YML053C	ydj14xcga	0.26587080933382223	0.3120377976452166	0.2629896639058537	1.0109553561352127	NA
YML053C	apj1dsis14x	0.05931372411083819	0.8267222061941119	0.27095352902191905	0.21890736882057715	0.9995467300026422
YML053C	apj1dydj14x	0.19576550957238992	0.45603159780548863	0.2626324501153508	0.745397263310028	0.8778060958687229
SLM2	apj1d	0.07303571867349352	0.6653204918681954	0.16883778988189108	0.432579215379359	0.9997008385809374
SLM2	sis14xcga	0.12942353279845698	0.5094989169906742	0.19620978713007126	0.6596181296127681	0.9816226614664663
SLM2	ydj14xcga	0.01337981375724561	0.937575136486303	0.17083967540835743	0.07831795351556302	NA
SLM2	apj1dsis14x	0.02994144360897793	0.8660191909616588	0.1774654071586287	0.1687170704892056	0.9995467300026422
SLM2	apj1dydj14x	-0.029712453041996024	0.8616176950684425	0.1704523771082554	-0.17431527530487567	0.9781105264839408
YJR096W	apj1d	0.25288284787548054	0.24582414555855794	0.21789877006937683	1.1605519746392563	0.9997008385809374
YJR096W	sis14xcga	0.40861743726986494	0.0980042103114945	0.24695737290513795	1.6546071593773568	0.9792828732932796
YJR096W	ydj14xcga	0.33521280086030564	0.12452708216799245	0.218230955351741	1.5360460678917676	NA
YJR096W	apj1dsis14x	0.41547807572282297	0.061956124898485794	0.22258434434688643	1.8666096078856356	0.9995467300026422
YJR096W	apj1dydj14x	0.7699432594625507	3.1000847466374463e-4	0.21347050459920103	3.6067898977807187	0.013747182527735971
TOA2	apj1d	-0.11854459783822528	0.5437275584678605	0.195236089603065	-0.60718588494186	0.9997008385809374
TOA2	sis14xcga	0.04046130171050598	0.8536743005368503	0.2193828994204151	0.18443234097735137	0.9907292550326111
TOA2	ydj14xcga	-0.41156162597068957	0.03660818434101964	0.1969093523533071	-2.0901070520624128	0.2502819875711446
TOA2	apj1dsis14x	-0.06096312508682364	0.7572953004518256	0.19726965615579858	-0.30903447734849043	0.9995467300026422
TOA2	apj1dydj14x	-0.315445173452501	0.10749894451811808	0.19598502515805244	-1.6095371225332635	0.5296656678077583
ODC1	apj1d	0.03561181761265055	0.9164858042398906	0.3396085155926294	0.10486138002313228	0.9997008385809374
ODC1	sis14xcga	0.37549377142836377	0.32297266084812026	0.37991308127467655	0.9883675765217528	0.9792828732932796
ODC1	ydj14xcga	0.008226144229755346	0.980761247874335	0.34112801925566916	0.024114536963878077	NA
ODC1	apj1dsis14x	0.41333400503288337	0.22597106048102278	0.3413719114044408	1.2108026209080378	0.9995467300026422
ODC1	apj1dydj14x	-0.0969680429550191	0.7761023736995885	0.34095422664579	-0.28440193837443495	0.9665870595653628
COA6	apj1d	0.1827097099378865	0.4703169685597593	0.25307336245007195	0.7219634187060391	0.9997008385809374
COA6	sis14xcga	0.3839761189088046	0.17932878026414348	0.28594659558387864	1.3428245862649912	0.9792828732932796
COA6	ydj14xcga	0.3834136893740975	0.1283623824476817	0.2521477271421245	1.5205914949928703	NA
COA6	apj1dsis14x	0.28172992463645535	0.27717809341178934	0.25925739811531584	1.0866803674051526	0.9995467300026422
COA6	apj1dydj14x	0.29478215535202196	0.24216811940235614	0.2520400139258123	1.169584744741328	0.7292347227086798
MDV1	apj1d	0.0902253312595601	0.668037453763674	0.21039243409414815	0.4288430410914174	0.9997008385809374
MDV1	sis14xcga	0.20837628993466348	0.3831282334742905	0.23892338054171688	0.8721469178202935	0.9792828732932796
MDV1	ydj14xcga	-0.023446143128086863	0.9120584615139244	0.21229278983358824	-0.11044248439368003	NA
MDV1	apj1dsis14x	-0.17908051296258343	0.41575080633188843	0.22005057829752095	-0.8138152344251345	0.9995467300026422
MDV1	apj1dydj14x	0.05075348592003218	0.8096941043300084	0.21075219473352158	0.24082067560058246	0.9694495315065704
LRO1	apj1d	0.01748919659649372	0.9598611050409259	0.34750511626494845	0.050327882318599956	0.9997008385809374
LRO1	sis14xcga	-0.20860010342977262	0.5934278264005637	0.39072815602384015	-0.5338752793055562	0.9838668840705705
LRO1	ydj14xcga	0.050544659536092905	0.8841800977776831	0.34697511598856173	0.1456722894726524	0.9861494807241878
LRO1	apj1dsis14x	0.02300705661254624	0.9473308368663793	0.3482803199023754	0.06605901998423347	0.9995467300026422
LRO1	apj1dydj14x	-0.042308822649233864	0.9029940269465684	0.3471349709429058	-0.12188003569422139	0.9859577703565844
BUD32	apj1d	-0.13243180883665	0.30240298264895804	0.1284132478097741	-1.0312939754691732	0.9997008385809374
BUD32	sis14xcga	-0.32420201997526754	0.03356637137564009	0.15254823763529315	-2.1252426445617685	0.9792828732932796
BUD32	ydj14xcga	-0.10261897208830056	0.4265244062307048	0.1290556025798818	-0.7951531745766891	0.8194786737470481
BUD32	apj1dsis14x	-0.20785287937086028	0.12209759551925836	0.13444307758372823	-1.546028870407359	0.9995467300026422
BUD32	apj1dydj14x	-0.08318184703341011	0.5165281546210427	0.1282272605983339	-0.6487064189413941	0.8977529131292183
PHO5	apj1d	1.68416484172984	0.03075303993972027	0.7796143992725768	2.1602536373125725	0.9997008385809374
PHO5	sis14xcga	0.7846302291257672	0.3682972235433712	0.8721335700216641	0.8996675005942916	0.9792828732932796
PHO5	ydj14xcga	0.16415440645889431	0.8334635022837691	0.780715093230355	0.21026160232111651	0.9780624379239289
PHO5	apj1dsis14x	1.8751428551521316	0.016183549978585194	0.7797663623614367	2.404749609195077	0.9995467300026422
PHO5	apj1dydj14x	-1.0311082848385758	0.18756595916779958	0.7824384746165223	-1.3178138835055728	0.6717608497152445
MTD1	apj1d	0.44068785691165857	0.07438135033603176	0.24698628043785653	1.7842604703808183	0.9997008385809374
MTD1	sis14xcga	0.46310401822408787	0.0944196143718699	0.2768881137588777	1.6725312326962958	0.9792828732932796
MTD1	ydj14xcga	0.7934033836650726	0.0012919149466837179	0.2465693484700776	3.217769721127182	0.031104335961877536
MTD1	apj1dsis14x	0.27188610578764233	0.27545260348484146	0.24930147294083752	1.0905916542745997	0.9995467300026422
MTD1	apj1dydj14x	0.27199999552284637	0.27173231433281914	0.24747926305812168	1.0990819681686457	0.7554960077630594
MET32	apj1d	0.8320973431269415	0.23462685285724802	0.7001095711292579	1.1885244502296846	NA
MET32	sis14xcga	1.3336872488538505	0.08084770449259382	0.7639454748642669	1.7457885316891388	0.9792828732932796
MET32	ydj14xcga	1.0446164725483746	0.13322585724848185	0.6957144965408821	1.5015016615899854	NA
MET32	apj1dsis14x	0.5977654660920578	0.41886906753246644	0.7394565375371265	0.8083848552925199	NA
MET32	apj1dydj14x	0.9051426701155	0.19468640470585102	0.697960423052823	1.29683953447744	NA
NOP8	apj1d	-0.024069006756382433	0.8920675019924389	0.17738421741163263	-0.1356885471976833	0.9997008385809374
NOP8	sis14xcga	-0.27593629933161024	0.17195720712173185	0.20201174285492937	-1.365941877595543	0.9792828732932796
NOP8	ydj14xcga	-0.05861529710339021	0.7417648771491602	0.17788241804055843	-0.32951709195917	0.9478255045319126
NOP8	apj1dsis14x	-0.008296112424507762	0.9631289828289353	0.17946299616285488	-0.04622742627666485	0.9995467300026422
NOP8	apj1dydj14x	-0.17937308611657077	0.313385158788397	0.17792400688321758	-1.0081443716266143	0.8016158424267431
CDC31	apj1d	-0.13911149115362634	0.34137840067866293	0.14621071639895175	-0.9514452468316043	0.9997008385809374
CDC31	sis14xcga	0.12653133793558616	0.4429292694549313	0.16491408728878756	0.7672560908275358	0.9792828732932796
CDC31	ydj14xcga	0.19085971801187973	0.18756243384098112	0.1448293993263697	1.3178244120296443	0.5968980710450458
CDC31	apj1dsis14x	-0.15791294728792532	0.2940346135226898	0.15049191256287878	-1.049311850707897	0.9995467300026422
CDC31	apj1dydj14x	0.11962198971881731	0.4084465287010687	0.1447103521667871	0.8266304927580165	0.8629054248382294
YKR051W	apj1d	-0.18011507844999428	0.5680988147908055	0.3155188043434684	-0.5708537049789402	0.9997008385809374
YKR051W	sis14xcga	-0.5013332430282396	0.1830670365576293	0.37655418585791234	-1.3313707876757235	0.9792828732932796
YKR051W	ydj14xcga	-0.038403008862343636	0.9028483248100305	0.31461369297783237	-0.12206400967121767	NA
YKR051W	apj1dsis14x	-0.6844930279182886	0.044215092470980225	0.34019751126188197	-2.0120459593585034	NA
YKR051W	apj1dydj14x	-0.014873532242188544	0.9621001477288538	0.313006423001837	-0.04751829722708678	0.9958293089450293
SCW11	apj1d	-0.14107824665477203	0.6397190033760058	0.301390180520654	-0.4680917155663738	0.9997008385809374
SCW11	sis14xcga	-0.33515923827491306	0.32217206962877354	0.3385432513180345	-0.990004192876548	0.9792828732932796
SCW11	ydj14xcga	0.12060736220199793	0.6884337441575072	0.3007803653342947	0.4009815004644733	0.9286955443443808
SCW11	apj1dsis14x	-0.22946907485740492	0.44799458070155684	0.30242538864248353	-0.7587626021989676	0.9995467300026422
SCW11	apj1dydj14x	0.23215523729538007	0.4397715135672489	0.30049380747961063	0.7725791065133096	0.8712277873767723
MPM1	apj1d	-0.2566968189355839	0.3199912122095163	0.2581227037017872	-0.9944759420781109	0.9997008385809374
MPM1	sis14xcga	0.35656665119354114	0.21257079980016383	0.28604796225734075	1.2465274997231368	0.9792828732932796
MPM1	ydj14xcga	0.10615240298115912	0.6782718540063553	0.25589837915539	0.4148224905977222	NA
MPM1	apj1dsis14x	-0.025408894552955537	0.92247882807006365	0.26110819625845666	-0.09731174630690133	0.9995467300026422
MPM1	apj1dydj14x	0.08082975838399446	0.7515819590310355	0.25534262587941636	0.3165541127557986	0.9624363312266803
MTC1	apj1d	-0.003435324081331126	0.9702368693414799	0.09207217621884714	-0.037311207602671134	0.9997008385809374
MTC1	sis14xcga	0.01476333097578065	0.8876533907796957	0.10450130977497979	0.1412741238130908	0.9936834375025748
MTC1	ydj14xcga	0.020664530607717994	0.8229053437213771	0.09233078850667834	0.2238097490765317	0.9740876642723593
MTC1	apj1dsis14x	0.0010634134001536648	0.9909571805096015	0.09382725928698121	0.011333736146987896	0.9995467300026422
MTC1	apj1dydj14x	0.035454554509572536	0.6999383906859091	0.0919933062182651	0.38540363388453913	0.9511758025573134
PEX13	apj1d	-0.004876830768520118	0.9855495632163208	0.2692607359421066	-0.018111926907786062	0.9997008385809374
PEX13	sis14xcga	-0.1275712093234326	0.677770812022529	0.30702543586401604	-0.41550697245792656	0.9838668840705705
PEX13	ydj14xcga	-0.04874892199142783	0.8567564476677145	0.2700702555427895	-0.18050459460428853	NA
PEX13	apj1dsis14x	-0.2749261495421757	0.3204655244510783	0.27672438878864486	-0.9935016958413354	0.9995467300026422
PEX13	apj1dydj14x	-0.16272507536644928	0.5471641366000893	0.27030068822873016	-0.602015024204268	0.9076871734048525
MSB2	apj1d	0.1369476176783094	0.7115974253677407	0.3704174723935473	0.36971154949410817	0.9997008385809374
MSB2	sis14xcga	-0.5563648118419262	0.1811784181277857	0.4160870911787017	-1.3371354786947183	0.9792828732932796
MSB2	ydj14xcga	-0.2341597685766292	0.5277016419266582	0.37078853089694735	-0.6315183698109282	0.8805671876627899
MSB2	apj1dsis14x	-0.27406733404946804	0.46062560863400354	0.3714570168836832	-0.7378170867486629	0.9995467300026422
MSB2	apj1dydj14x	0.09158100435411737	0.8046765971022031	0.370324553018975	0.24729930437376338	0.9694495315065704
NUS1	apj1d	-0.053496233560633086	0.8575530699112283	0.2980459746630828	-0.17948987105464623	0.9997008385809374
NUS1	sis14xcga	-0.3644268534113077	0.2798122670193203	0.3372008634020367	-1.0807411633961628	0.9792828732932796
NUS1	ydj14xcga	-0.2428433987719123	0.4162605279589068	0.29872758443833697	-0.8129259279102153	0.8114229107131845
NUS1	apj1dsis14x	-0.04908059600683465	0.8699119254850948	0.2996915672156842	-0.16377036051705776	0.9995467300026422
NUS1	apj1dydj14x	-0.22419119974740181	0.4523844068873889	0.2983464665014147	-0.751445801843739	0.8770141495755883
SSU1	apj1d	-0.13055644386543042	0.7565479471370579	0.42112657918848817	-0.31001710724840253	0.9997008385809374
SSU1	sis14xcga	-0.7291091619674915	0.13040170669632759	0.4820493679344864	-1.5125196929344011	0.9792828732932796
SSU1	ydj14xcga	-0.12146618428800247	0.7729326869370784	0.4209668785899843	-0.28854095290073595	NA
SSU1	apj1dsis14x	-0.5429442847882879	0.20446199056092534	0.42787185862763966	-1.2689413286719362	0.9995467300026422
SSU1	apj1dydj14x	-0.17483007538771397	0.6778313854828666	0.42084710150370996	-0.4154242116983495	0.9442756655736766
RSC2	apj1d	0.11094101087783712	0.34542208276426795	0.11758377363128264	0.9435061271780935	0.9997008385809374
RSC2	sis14xcga	-0.008160781744023123	0.9521158385662339	0.13589985397619417	-0.060049966981220324	0.9994389642405372
RSC2	ydj14xcga	-0.041528102549967014	0.7272368392235059	0.11905873398561356	-0.3488034952142617	0.9429880502416104
RSC2	apj1dsis14x	-0.09873824274370968	0.4204708416799401	0.12256414153120937	-0.8056046532873342	0.9995467300026422
RSC2	apj1dydj14x	0.061151013308781775	0.6041204071112647	0.11794187904531804	0.5184843060308127	0.9269972050962908
FMP30	apj1d	-0.3398179665215889	0.1846643200570527	0.256170652491649	-1.3265296520750627	0.9997008385809374
FMP30	sis14xcga	-0.03771229341842921	0.8960612230731019	0.2886765446772162	-0.1306385784151505	0.9951543377398794
FMP30	ydj14xcga	-0.40065305657365263	0.12016467837419692	0.25780677093569937	-1.5540827539924509	NA
FMP30	apj1dsis14x	-0.25223572307224273	0.33509523079175535	0.26168200881110315	-0.963901661479222	0.9995467300026422
FMP30	apj1dydj14x	-0.33192097244997354	0.19486117196435734	0.25604629433109155	-1.2963318735664615	0.6796314636192423
YOR072W-B	apj1d	-0.14411935134852846	0.8842215607375704	0.9896963309846212	-0.1456197692530073	NA
YOR072W-B	sis14xcga	0.8435125796554146	0.44085201389309325	1.0943974428615746	0.7707552545534472	0.9792828732932796
YOR072W-B	ydj14xcga	0.013075733134811047	0.9895211458831868	0.9955884055455169	0.013133673576327365	NA
YOR072W-B	apj1dsis14x	-0.48924352741570487	0.6364999806872282	1.035221235437625	-0.47259804056172033	NA
YOR072W-B	apj1dydj14x	0.6759658428052054	0.48786791157783566	0.9744299118950502	0.6937039129788223	0.8864775264175085
NAR1	apj1d	-0.16784395873065563	0.17457902575504397	0.12362951886845605	-1.357636592513512	0.9997008385809374
NAR1	sis14xcga	-0.07188417643525045	0.6139404946933327	0.1424982142198995	-0.5044566826944279	0.9838668840705705
NAR1	ydj14xcga	-0.11480899751257578	0.3548987240496282	0.12410050603828558	-0.9251291648815411	0.779787435511434
NAR1	apj1dsis14x	-0.20531283381111715	0.11110550179069201	0.1288646657557801	-1.5932438314799109	0.9995467300026422
NAR1	apj1dydj14x	-0.10577225746527	0.39127973378473385	0.12337851054169861	-0.8572988683432179	0.851817092137585
SDC1	apj1d	-0.20101218813268704	0.42760082339983746	0.25338612954446516	-0.793303834326151	0.9997008385809374
SDC1	sis14xcga	-0.37407646725319743	0.20445774332071914	0.2947913733692269	-1.2689532362423162	0.9792828732932796
SDC1	ydj14xcga	-0.01836405589634705	0.9420837570741882	0.2527704916628469	-0.072651106446561	NA
SDC1	apj1dsis14x	-0.10976206221473532	0.6719166302985042	0.2591667884685311	-0.4235190120745853	0.9995467300026422
SDC1	apj1dydj14x	-0.09840697555978589	0.6967670303364635	0.2525273895263272	-0.38968832546984566	0.9509250161207286
BEM1	apj1d	0.0990905921279666	0.44103675320372404	0.12861497226603089	0.7704436768295124	0.9997008385809374
BEM1	sis14xcga	0.01619576112955123	0.9134517970748488	0.14901466807170777	0.10868568402781412	0.9968228537734142
BEM1	ydj14xcga	0.20940841148902892	0.10360576899358016	0.1286593819838575	1.627618664570476	0.4508914849754456
BEM1	apj1dsis14x	0.03625154628680354	0.7858080931041943	0.1333964220461277	0.27175801067788735	0.9995467300026422
BEM1	apj1dydj14x	0.10422781718151854	0.41809450278009397	0.12871898357632922	0.8097315119002036	0.8660942520883554
YKR018C	apj1d	-0.06469341221628523	0.5385641405154935	0.10519498004112503	-0.614985735925744	0.9997008385809374
YKR018C	sis14xcga	0.01503172620112234	0.8990000724508774	0.11843035670316249	0.1269246046332388	0.9957662603619604
YKR018C	ydj14xcga	-0.11956176448002911	0.2571502815866165	0.10551252420316623	-1.1331523473915839	0.6773145071498152
YKR018C	apj1dsis14x	0.04943958939830043	0.6412876030937085	0.10611647729616097	0.46589927085799554	0.9995467300026422
YKR018C	apj1dydj14x	-0.16340452106938627	0.1209768688314407	0.1053756111035207	-1.5506863434353717	0.5604872140680531
ECM27	apj1d	-0.31392749507401224	0.3539165619990901	0.33864184550466725	-0.9270192069919062	0.9997008385809374
ECM27	sis14xcga	-0.949586413249403	0.022109648181174887	0.41494217757133967	-2.288478888329311	0.9792828732932796
ECM27	ydj14xcga	-0.10386335785676686	0.7573247448550638	0.33613197358239233	-0.30899576957771313	NA
ECM27	apj1dsis14x	-0.42244064396451597	0.22877176411889785	0.35100169908773576	-1.203528772260796	NA
ECM27	apj1dydj14x	-0.01915605365787556	0.9542576806960222	0.33395643727209573	-0.05736093549910491	0.9958293089450293
PDR15	apj1d	-1.3054290820545968	0.023065664370783986	0.5744853555048767	-2.2723452731137814	0.9997008385809374
PDR15	sis14xcga	0.5929214254539849	0.3525024378028901	0.6377238641075461	0.9297463350908791	0.9792828732932796
PDR15	ydj14xcga	-1.9862022151098788	5.698824238774806e-4	0.5764530520614997	-3.4455576356250748	0.01704450322076453
PDR15	apj1dsis14x	0.05722378379408929	0.9202112868552363	0.5712805070054948	0.10016757633485801	0.9995467300026422
PDR15	apj1dydj14x	-1.9769722877044058	6.03350622282516e-4	0.576359335697044	-3.4301036961836884	0.022905620386941272
PGM1	apj1d	-0.027567022180117137	0.8173530174283795	0.11936317635977779	-0.23095080929336334	0.9997008385809374
PGM1	sis14xcga	-0.10115930449145558	0.4516630393367861	0.13440500265319238	-0.7526453814556198	0.9792828732932796
PGM1	ydj14xcga	-0.1708863609608429	0.15364591772964525	0.11977140201339304	-1.4267709827904835	0.550231971609736
PGM1	apj1dsis14x	0.008633184763938718	0.9427434559766128	0.12020228290710643	0.07182213644486714	0.9995467300026422
PGM1	apj1dydj14x	-0.4129906683689555	5.770993934295212e-4	0.11998026347819563	-3.44215503780761	0.022228857657865576
OXA1	apj1d	-0.06723475864025087	0.8059356833410972	0.2736762598263967	-0.24567260120735515	0.9997008385809374
OXA1	sis14xcga	0.11005624309264683	0.7197015840866343	0.30668495904605825	0.35885764804043907	0.9872814001744901
OXA1	ydj14xcga	-7.318081289289495e-4	0.9978645158399566	0.2734263832816173	-0.0026764356831477337	0.9996333789434448
OXA1	apj1dsis14x	0.05721202213782406	0.8352965274708903	0.2751722662955888	0.20791347510423586	0.9995467300026422
OXA1	apj1dydj14x	0.031088482154066344	0.9093167606320007	0.2729444878067463	0.1139003846675153	0.9861209506483903
PET100	apj1d	-0.043707817445814263	0.8369866914349413	0.21243232648342952	-0.20574937049057657	0.9997008385809374
PET100	sis14xcga	0.15563462033012507	0.518801786285053	0.24122161180889923	0.6451935179565172	0.9816226614664663
PET100	ydj14xcga	0.035596314050308324	0.8670581540573832	0.21264682570308766	0.16739640449658244	NA
PET100	apj1dsis14x	0.3225048140174326	0.13269199392289252	0.21449264660688436	1.5035704911996803	0.9995467300026422
PET100	apj1dydj14x	-0.05331671567473324	0.8020643435074426	0.21269144350158753	-0.2506763544267134	0.9694495315065704
VPS41	apj1d	-0.012450916376746411	0.9199430451991769	0.12388297996301517	-0.10050546395044412	0.9997008385809374
VPS41	sis14xcga	-0.049758317135054665	0.7322313046064299	0.1454245831416544	-0.34215891192609676	0.9872814001744901
VPS41	ydj14xcga	0.0833638194663575	0.5012997207687635	0.12397099951441902	0.6724461349257855	0.8675736276275305
VPS41	apj1dsis14x	0.06148748886106413	0.6326532269525554	0.12863605652701202	0.4779957542320376	0.9995467300026422
VPS41	apj1dydj14x	0.16144927276684248	0.1883239344648176	0.12272345235724394	1.3155535447036557	0.6717608497152445
SLX9	apj1d	-0.04091566934407233	0.7642597272408364	0.136434794592317	-0.29989175024108106	0.9997008385809374
SLX9	sis14xcga	-0.23903415853249713	0.13307269328229251	0.15913389686417084	-1.5020945458058215	0.9792828732932796
SLX9	ydj14xcga	0.02452291942217169	0.857690119206911	0.13675864169886212	0.17931531870702785	0.9814460160950513
SLX9	apj1dsis14x	-0.1852876904527211	0.19111817943521603	0.14173544925804754	-1.3072783938150936	0.9995467300026422
SLX9	apj1dydj14x	-0.2715209394353942	0.049209144883150244	0.1380538832257883	-1.9667750960059514	0.37274445082601915
SCO1	apj1d	-0.4789926157670048	0.03873634760362449	0.23173585412762207	-2.0669767204138076	0.9997008385809374
SCO1	sis14xcga	-0.0660896145323058	0.7989220619601219	0.25943703612692864	-0.2547424050125661	0.9891642230397101
SCO1	ydj14xcga	-0.7119021125861427	0.0023960195322406336	0.23447351133137556	-3.0361728646611565	NA
SCO1	apj1dsis14x	-0.29007427650418127	0.2162289672121169	0.23457065753046283	-1.236617911029688	0.9995467300026422
SCO1	apj1dydj14x	-0.6349051428676072	0.00642025997478205	0.23294927695825585	-2.725508106991812	0.11331007320041767
PGM2	apj1d	0.11742175995926234	0.8586874439379242	0.6595051766450054	0.17804524379414755	0.9997008385809374
PGM2	sis14xcga	1.7113622664087316	0.019043775268269458	0.7298938029159422	2.344672964165199	0.9399126107612
PGM2	ydj14xcga	0.04272737799415637	0.948404455157762	0.6602844776026705	0.06471055952926366	NA
PGM2	apj1dsis14x	1.0785429795958745	0.10083052815023684	0.6573112850842298	1.640840502924983	0.9995467300026422
PGM2	apj1dydj14x	2.211463575418928	7.156813082283112e-4	0.6536023003196014	3.383500294196572	0.02604586388635033
FEN2	apj1d	-0.0657284806032022	0.8333455327151102	0.31237877339904535	-0.21041276232696504	0.9997008385809374
FEN2	sis14xcga	-0.2149199394484687	0.5428491868308147	0.35319040302301863	-0.6085101339360618	0.9816226614664663
FEN2	ydj14xcga	-0.09716091431732718	0.7555836059757302	0.31212800183168166	-0.31128547822416214	0.9506563316249776
FEN2	apj1dsis14x	-0.3305529708289546	0.2963848748438768	0.31655573776955837	-1.0442172779998249	0.9995467300026422
FEN2	apj1dydj14x	-0.10234216280052923	0.7428057237400971	0.3118855571020518	-0.3281401157253394	0.9607667974126741
ZPS1	apj1d	-0.7295311397714854	0.23957761531361615	0.6203268234332976	-1.1760431956396455	NA
ZPS1	sis14xcga	-0.910492345040498	0.2519752736348755	0.7947977749947719	-1.1455647885356588	0.9792828732932796
ZPS1	ydj14xcga	0.3111667184726516	0.5844484103782173	0.5689660369400965	0.5468985814093729	NA
ZPS1	apj1dsis14x	-0.14298564480368545	0.8179822421324362	0.621295959211935	-0.23014095405521626	NA
ZPS1	apj1dydj14x	0.1265974490943439	0.8254412984560784	0.5740027901723695	0.22055197511553462	NA
1	apj1d	0.1511391079039994	0.28632815457700544	0.1417534347983808	1.0662112570250455	0.9997008385809374
1	sis14xcga	-0.06270714022269631	0.7006149036937649	0.1630915020661701	-0.3844905432120831	0.9854540024253493
1	ydj14xcga	0.07219604144634396	0.612863885394969	0.1426828302366514	0.5059896928495237	0.9088020730791955
1	apj1dsis14x	0.10946586166097191	0.45031887481592264	0.14501026815544105	0.7548835199975772	0.9995467300026422
1	apj1dydj14x	-0.015592047570240436	0.9129334116598401	0.1426024666700339	-0.10933925572492854	0.9873491525658142
LNP1	apj1d	0.02151501367877393	0.9524455017929394	0.3607719140871055	0.05963605491080245	0.9997008385809374
LNP1	sis14xcga	-0.4068987726225362	0.32268437714959275	0.41144249749182976	-0.9889565980738687	0.9792828732932796
LNP1	ydj14xcga	0.059922157625337695	0.8679798426445255	0.36048812017647935	0.16622505506146057	NA
LNP1	apj1dsis14x	-0.07214353533145655	0.8430541006801312	0.36438254580631213	-0.1979884496712543	0.9995467300026422
LNP1	apj1dydj14x	0.1573944296572722	0.6615340086325132	0.3595152747249917	0.43779622375619454	0.9399340235739828
YJL009W	apj1d	-0.12327113295722888	0.9160071070057652	1.1688382380567992	-0.10546466477873612	NA
YJL009W	sis14xcga	-1.1160852103728005	0.4635139388553417	1.5224749655172427	-0.7330729474383336	0.9792828732932796
YJL009W	ydj14xcga	-1.058962769089566	0.405057570095446	1.2718399447224726	-0.8326226688222483	NA
YJL009W	apj1dsis14x	-1.8415616873768115	0.19455846695924134	1.4196311556136816	-1.297211377824923	NA
YJL009W	apj1dydj14x	-1.0320747528827217	0.4127816556232097	1.2601517019940918	-0.8190083394321048	NA
YLF2	apj1d	-0.008304854209719143	0.982467867013108	0.3779221665016477	-0.02197503863453041	0.9997008385809374
YLF2	sis14xcga	0.4287958401549143	0.3082887664976315	0.4208752668280359	1.0188192891128351	0.9792828732932796
YLF2	ydj14xcga	0.11726475688990795	0.755769009512451	0.3770066871517715	0.31104158330937165	NA
YLF2	apj1dsis14x	0.17600872753101116	0.6466003692743807	0.3838877334552522	0.4584901058098737	NA
YLF2	apj1dydj14x	0.34993677081169	0.3474836587060888	0.37247867405745644	0.9394813587574969	0.8257623897838239
DCS2	apj1d	-0.00501544243525758	0.9945089495849192	0.7287699426211115	-0.006882065439223412	NA
DCS2	sis14xcga	1.7746765967944587	0.02189925349527174	0.7742542982573379	2.29211074551195	0.9792828732932796
DCS2	ydj14xcga	0.5059376128763986	0.48164937855669593	0.7190165738185482	0.703652226247677	NA
DCS2	apj1dsis14x	1.0185779718047394	0.15558853475667486	0.7172752094300792	1.4200657689174347	NA
DCS2	apj1dydj14x	1.7838325611219903	0.010619767879579222	0.6981820639910228	2.5549676124950222	0.1574171772487066
CUE5	apj1d	0.030300314610787277	0.8468282951150066	0.1568608366595853	0.19316685576874815	0.9997008385809374
CUE5	sis14xcga	0.14184610096397202	0.42071642657907976	0.17616717677741264	0.8051789417230354	0.9792828732932796
CUE5	ydj14xcga	0.1810692279855679	0.24818625298797337	0.15680165838241045	1.1547660264151882	0.66678205563365
CUE5	apj1dsis14x	0.1637553696430287	0.2999833640510393	0.15799349457184744	1.0364690653042112	0.9995467300026422
CUE5	apj1dydj14x	0.043514795006462346	0.7814392191492481	0.15684173713192626	0.27744397506806623	0.9665870595653628
STE6	apj1d	0.1627613058304476	0.6176333056175304	0.3260394713397279	0.4992073664015144	0.9997008385809374
STE6	sis14xcga	-0.5114588331917831	0.16234459503266527	0.36605215227791377	-1.3972294111891297	0.9792828732932796
STE6	ydj14xcga	-0.5169846447354949	0.11355896083730851	0.32670981607022026	-1.582397036470978	0.47266239171151425
STE6	apj1dsis14x	-0.07399805017852604	0.820776305360759	0.32663498013348835	-0.22654661833305392	0.9995467300026422
STE6	apj1dydj14x	-0.04407044577875363	0.8924983448526712	0.3261008910630826	-0.1351435920186689	0.9859577703565844
CDC27	apj1d	-0.020435875837520524	0.9226184750296165	0.2103843867536184	-0.09713589564729926	0.9997008385809374
CDC27	sis14xcga	-0.09243583903391726	0.7082018764801036	0.24697495617217308	-0.374272114333235	0.9865597402237413
CDC27	ydj14xcga	0.16352424990002934	0.43481995306224563	0.20938599888577147	0.7809703168798714	NA
CDC27	apj1dsis14x	-0.02078907277277503	0.9244579800027583	0.21924828362239687	-0.09481977431841279	0.9995467300026422
CDC27	apj1dydj14x	0.13634416668501093	0.5135855919365744	0.20871194987730138	0.6532647831864232	0.8973651226854662
EFB1	apj1d	0.13011087822166778	0.3480131359232284	0.13864442505913513	0.9384501264019265	0.9997008385809374
EFB1	sis14xcga	0.14146961682846834	0.3615253895507756	0.15504159653766095	0.9124623326108755	0.9792828732932796
EFB1	ydj14xcga	0.20912970485694288	0.13147494399690138	0.13865157916610624	1.5083110204349206	0.5100241379668777
EFB1	apj1dsis14x	0.14691465094393769	0.2894795792705552	0.1386950327936101	1.0592639691902959	0.9995467300026422
EFB1	apj1dydj14x	0.6382182993505481	4.1398199471293455e-6	0.13861544962776096	4.604236404126846	4.12185469075501e-4
YLR140W	apj1d	-0.45276659192814683	0.5708707811475214	0.7988548706730807	-0.5667695204094646	NA
YLR140W	sis14xcga	0.5012592523059397	0.5593852333609496	0.8586810369118169	0.5837548877388532	0.9838668840705705
YLR140W	ydj14xcga	-0.09652843773381656	0.9019072339061727	0.7831769521736831	-0.12325239840869283	NA
YLR140W	apj1dsis14x	-0.5622576210433065	0.5118326623922383	0.8571173703461272	-0.6559867300510449	NA
YLR140W	apj1dydj14x	-0.29557131329557107	0.7086384869140108	0.7909632476405998	-0.37368526815530834	NA
TDH2	apj1d	-0.016219713919875325	0.9272755493402227	0.1777051991692297	-0.09127315349073832	0.9997008385809374
TDH2	sis14xcga	0.1991144887013855	0.316260201496104	0.19868281506154198	1.0021726772882185	0.9792828732932796
TDH2	ydj14xcga	0.05358079468563504	0.7630239826870611	0.17770691430695143	0.30151215496930783	0.9510522579339811
TDH2	apj1dsis14x	0.04956837458448508	0.780306517860581	0.17771563046377606	0.27891961137649424	0.9995467300026422
TDH2	apj1dydj14x	-0.02362583290141726	0.8942335854505998	0.17770576626309395	-0.13294916309265473	0.9859577703565844
SBE22	apj1d	-0.028453001676067655	0.8328946979848075	0.1348544319493033	-0.21099048258765554	0.9997008385809374
SBE22	sis14xcga	-0.03939657932898668	0.8002487546200057	0.15570220791482167	-0.25302518093088916	0.9891642230397101
SBE22	ydj14xcga	0.0140539052499693	0.917322001092679	0.13538410909561582	0.10380764288993213	0.990764062766344
SBE22	apj1dsis14x	-0.08881506125820439	0.525756570702546	0.1399771334946594	-0.6344969284686273	0.9995467300026422
SBE22	apj1dydj14x	-0.018668634981937157	0.8899718444226178	0.134947645335821	-0.1383398349447279	0.9859577703565844
YKL075C	apj1d	0.18379349316007418	0.2400132245870138	0.15642615298510804	1.174953737931352	0.9997008385809374
YKL075C	sis14xcga	0.15338638522708728	0.40029939568401907	0.18236692493504897	0.8410866459568627	0.9792828732932796
YKL075C	ydj14xcga	0.3376707521239791	0.030392573625915922	0.15597261317695008	2.164936172101531	0.22804767829513783
YKL075C	apj1dsis14x	0.2683924178694053	0.09750211321880893	0.1619665105664269	1.6570858810922535	0.9995467300026422
YKL075C	apj1dydj14x	0.31377698949618393	0.04351501742357532	0.15543266406948048	2.0187326220949378	0.353819332733755
RBH1	apj1d	0.05067132581948726	0.8012938683244584	0.2013379911969876	0.2516729481517018	0.9997008385809374
RBH1	sis14xcga	-0.01996032972598155	0.9332217951685053	0.23821278479862398	-0.08379201705254928	0.9979069978915025
RBH1	ydj14xcga	-0.4587534260553527	0.030446578312857246	0.2119705781672643	-2.164231611867162	NA
RBH1	apj1dsis14x	0.15285669885720293	0.4648663309244983	0.20914712440935623	0.7308572818721712	0.9995467300026422
RBH1	apj1dydj14x	-0.03905489905640848	0.847546260448229	0.20314625509092915	-0.1922501551354089	0.9765532363526219
JJJ1	apj1d	-0.17526555624422377	0.4701395520398614	0.242665376944468	-0.7222520099533271	0.9997008385809374
JJJ1	sis14xcga	-0.1551547079935274	0.5720941343681658	0.27462465928594587	-0.5649700518407437	0.9838668840705705
JJJ1	ydj14xcga	-0.13130675392800814	0.5891884152559415	0.2431550289527087	-0.5400124952938811	0.907646399479474
JJJ1	apj1dsis14x	-0.1567041025576958	0.5243467822669854	0.24613494174377035	-0.6366593115447492	0.9995467300026422
JJJ1	apj1dydj14x	-0.3620591081154129	0.1375487697803053	0.24381391249414816	-1.4849813302762318	0.5939810623000581
VPS70	apj1d	0.02548655644227472	0.93467660312014	0.31095419940251207	0.0819624127644723	0.9997008385809374
VPS70	sis14xcga	-0.32115732325141055	0.3606561803391402	0.3513312460797186	-0.9141154589436618	0.9792828732932796
VPS70	ydj14xcga	0.0481684255928905	0.8767682226413492	0.31062906509186233	0.1550673488285639	0.9845338469317335
VPS70	apj1dsis14x	-0.03309466583086202	0.9156659232462225	0.31252437844157155	-0.10589466970830015	0.9995467300026422
VPS70	apj1dydj14x	0.1380074086724793	0.6563442422927365	0.31015262548422134	0.44496611452834617	0.93979732446328
GTO3	apj1d	-1.4936278661414408	0.06845142995946178	0.8197632576829303	-1.8220234343793305	NA
GTO3	sis14xcga	-0.5345992960686956	0.5495955870505875	0.893431581742243	-0.5983662397809983	0.9829843803133
GTO3	ydj14xcga	-1.3434310288155185	0.09986255411356175	0.8164171575259793	-1.645520327973716	NA
GTO3	apj1dsis14x	-0.28575651915527267	0.715293560319606	0.7834183058392072	-0.36475598926574326	NA
GTO3	apj1dydj14x	-1.1002867072604585	0.16798463060719113	0.7980560524589112	-1.3787085554584	NA
ATP18	apj1d	0.12998563637509672	0.3563283630241121	0.1409235741526133	0.9223839031667523	0.9997008385809374
ATP18	sis14xcga	0.2596806038633884	0.10257317895202286	0.159068810656544	1.6325048436055891	0.9792828732932796
ATP18	ydj14xcga	-0.049161420370199854	0.7299063633493615	0.14239364892676556	-0.34525009184562755	0.9445679140880083
ATP18	apj1dsis14x	0.2436059285848203	0.08886491696351893	0.14317835399428022	1.7014159039330206	0.9995467300026422
ATP18	apj1dydj14x	0.020242698697182364	0.8862497102257634	0.14150662440128436	0.14305124429919364	0.9851204687638924
YOR1	apj1d	-0.2625733234419993	0.20560594788171324	0.2074463851507042	-1.2657406551155224	0.9997008385809374
YOR1	sis14xcga	-0.46836076865141524	0.045225482640801326	0.23388204475361704	-2.002551196885634	0.9792828732932796
YOR1	ydj14xcga	-0.5393361676981513	0.009546306050372964	0.20808975257619622	-2.591843956855408	0.10855232550063278
YOR1	apj1dsis14x	-0.2781386564287126	0.18215992130483583	0.20847878958781882	-1.3341340717615329	0.9995467300026422
YOR1	apj1dydj14x	-0.6109114358300136	0.00332498885238147	0.20807772625691887	-2.9359770832737078	0.07569546282050216
ECM10	apj1d	-0.3463637122278341	0.41952973991207176	0.42907294118549144	-0.8072373691775134	0.9997008385809374
ECM10	sis14xcga	1.2345648703576753	0.008675178189147367	0.47038278487729124	2.624596201325132	0.7618847668468834
ECM10	ydj14xcga	0.020071217905198196	0.96259903691696	0.42802768885261955	0.04689233530429199	NA
ECM10	apj1dsis14x	-0.03713661354851902	0.9315700959159264	0.4324769574352854	-0.0858695773498546	0.9995467300026422
ECM10	apj1dydj14x	0.15260727948242603	0.7201878326747002	0.42603006445902136	0.35820777032768514	0.9558428553884288
YML083C	apj1d	-0.6960100059165499	0.35887310343745965	0.7585820316061347	-0.9175144900847415	NA
YML083C	sis14xcga	-0.6268268796375239	0.47858830570744115	0.8846303525881561	-0.7085749181040661	0.9792828732932796
YML083C	ydj14xcga	-0.0014240109374390713	0.9984683234459795	0.7417986784309466	-0.0019196730579934989	NA
YML083C	apj1dsis14x	-1.2908246096596443	0.12090453385841805	0.8322595144349405	-1.5509881080014385	NA
YML083C	apj1dydj14x	-0.9418405142893735	0.2233981458894781	0.7735590850568734	-1.2175417915492877	NA
PHO92	apj1d	1.6927957466241383	0.07104097316732444	0.9377250457822939	1.805215456532815	NA
PHO92	sis14xcga	3.5080441396929496	2.6734360400833154e-4	0.9624141349622028	3.6450463602456566	0.0798288001568878
PHO92	ydj14xcga	1.505994838165578	0.11270113112645758	0.9494546164584332	1.586168324488325	NA
PHO92	apj1dsis14x	1.6573184001159589	0.08534585433767393	0.9632903214007775	1.7204765409725638	NA
PHO92	apj1dydj14x	1.1366189746450046	0.23771400800681286	0.9626491105921995	1.1807199135578932	NA
SKI6	apj1d	0.07544973747854337	0.5956815290173625	0.14219142413827404	0.5306208720799666	0.9997008385809374
SKI6	sis14xcga	-0.12858894495114934	0.4336180996109176	0.16422276443872633	-0.7830153474193132	0.9792828732932796
SKI6	ydj14xcga	-0.035847306299376956	0.8027537810493037	0.1435127654263129	-0.24978479226492836	0.9683967413387335
SKI6	apj1dsis14x	-0.08532301560347985	0.561101216940592	0.14680324506908662	-0.58120660454969	0.9995467300026422
SKI6	apj1dydj14x	-0.05402256824345931	0.7055850177547263	0.1429954819418512	-0.37779213377823695	0.9519163996422189
INN1	apj1d	-0.15816126186158078	0.39804867273325845	0.18714842980062	-0.8451113484098107	0.9997008385809374
INN1	sis14xcga	-0.31650962025372115	0.15248080484586413	0.2212080100703397	-1.430823504777596	0.9792828732932796
INN1	ydj14xcga	-0.3204445375479417	0.0923344198534537	0.19037702495471426	-1.6832101332824543	NA
INN1	apj1dsis14x	-0.05296029780662962	0.783711454015309	0.1929437981616838	-0.2744856186683427	0.9995467300026422
INN1	apj1dydj14x	-0.11359528536822495	0.5433947728807946	0.18693043775477922	-0.6076874731189714	0.9061314501035995
SPC2	apj1d	-0.003119244788309969	0.9868043855109525	0.18859931085192186	-0.01653900416825507	0.9997008385809374
SPC2	sis14xcga	-0.07124452803030706	0.7401897333293563	0.21484944738652573	-0.3316021004333063	0.9872814001744901
SPC2	ydj14xcga	-0.06608938199408036	0.7270465071714021	0.1893369259287871	-0.3490570139442199	0.9429880502416104
SPC2	apj1dsis14x	0.07331463006789014	0.7015759000796067	0.1913250814616285	0.38319403555353443	0.9995467300026422
SPC2	apj1dydj14x	-0.006093119755990562	0.9742092145268034	0.18846883995309346	-0.03232958698905894	0.9974355601336777
FHL1	apj1d	-0.01173319866322105	0.9447730352353335	0.1693784231225059	-0.06927209763155492	0.9997008385809374
FHL1	sis14xcga	0.06534700213607483	0.7346754180239232	0.19281361235996097	0.3389128046316536	0.9872814001744901
FHL1	ydj14xcga	-0.2331395868975337	0.17491793711627446	0.17185962987302802	-1.3565698184604496	0.5832212882274381
FHL1	apj1dsis14x	-0.07915463771801891	0.6500352998046826	0.1744596502083872	-0.45371315157098446	0.9995467300026422
FHL1	apj1dydj14x	-0.09573848459298348	0.573463605131388	0.17006333486221606	-0.5629578219817342	0.9154926072683456
IPI1	apj1d	0.11620809400227675	0.5351791876642689	0.18739632396539302	0.6201193894483075	0.9997008385809374
IPI1	sis14xcga	-0.08516396863162175	0.692322874411057	0.21522100878463848	-0.39570471819896225	0.9854540024253493
IPI1	ydj14xcga	-0.11866663180245808	0.5314484395161695	0.18962495824365785	-0.6257964821802511	0.8841442364801433
IPI1	apj1dsis14x	-0.08263344538972676	0.6683804233592323	0.19290120803546082	-0.4283718398203932	0.9995467300026422
IPI1	apj1dydj14x	-0.17458042950703212	0.35639255356612637	0.18929616076276234	-0.922260804464107	0.83067868897535
EMW1	apj1d	0.07477401293019006	0.5730158172707868	0.13266847578889948	0.5636155272422787	0.9997008385809374
EMW1	sis14xcga	-0.12806269674544216	0.3928363186859746	0.14987120567117526	-0.854484997114242	0.9792828732932796
EMW1	ydj14xcga	-0.21278844422152832	0.11084972872673837	0.13346110496598498	-1.5943854524189753	0.46607592421445654
EMW1	apj1dsis14x	-0.0250243587677689	0.8518744487140589	0.13401553230663762	-0.18672730195565157	0.9995467300026422
EMW1	apj1dydj14x	-0.12239619054410668	0.35753483889256776	0.13302884458760497	-0.920072567145419	0.8312472223132443
PTM1	apj1d	-0.3508181936324622	0.3645468324526662	0.386902576318483	-0.9067352225219675	0.9997008385809374
PTM1	sis14xcga	-0.6665036775395988	0.12461454221838066	0.43400938868139527	-1.5356895378797364	0.9792828732932796
PTM1	ydj14xcga	-0.7373505019604495	0.05689930155268544	0.3872469227714559	-1.9040835668450657	0.3196600829165299
PTM1	apj1dsis14x	-0.35316568155942557	0.3617676925547948	0.38724224511456723	-0.912001947140194	0.9995467300026422
PTM1	apj1dydj14x	-0.6149323785157774	0.11206033534628143	0.38699325373723903	-1.5890002540801518	0.5405323488321089
YAR075W	apj1d	-0.29961496557860856	0.3083805491791617	0.2941363772005901	-1.0186260143344401	0.9997008385809374
YAR075W	sis14xcga	-0.1725709718559148	0.6035088702742215	0.3322754294416351	-0.5193612183299496	0.9838668840705705
YAR075W	ydj14xcga	-0.7104846554739348	0.01742016358177654	0.2988095261540482	-2.377717553447917	NA
YAR075W	apj1dsis14x	-0.41156455651456253	0.1705115007457952	0.3002888763624283	-1.370562111724152	0.9995467300026422
YAR075W	apj1dydj14x	-0.5329956643737948	0.07182511073170908	0.2960716860528182	-1.80022504508827	0.4417495446750918
MHF1	apj1d	0.13388972830012383	0.6550539766268482	0.2996957234288144	0.44675221510768787	0.9997008385809374
MHF1	sis14xcga	0.4249347151133715	0.20840314908268306	0.337794400775212	1.2579684984066617	0.9792828732932796
MHF1	ydj14xcga	-0.029958750509490525	0.9216619898528825	0.304643330427708	-0.09834041161324472	NA
MHF1	apj1dsis14x	0.23261413789835006	0.45119230433490126	0.3087407191090285	0.7534287623920602	NA
MHF1	apj1dydj14x	-0.3042379976637562	0.32441047850402804	0.30873474039476323	-0.9854349312122851	0.8071259288381687
RPS9A	apj1d	0.03987157882870732	0.8503904974014018	0.21138551550970322	0.1886202029148828	0.9997008385809374
RPS9A	sis14xcga	0.07977558702819315	0.7358281869058676	0.23645406993231474	0.33738301502287105	0.9872814001744901
RPS9A	ydj14xcga	0.22621705041098744	0.2845089960437902	0.21136938549614567	1.07024510612069	0.7132958366675733
RPS9A	apj1dsis14x	-0.039911278730703395	0.8504108590946515	0.21162513674728675	-0.1885942253559588	0.9995467300026422
RPS9A	apj1dydj14x	-0.19943869677696305	0.3456182749290203	0.21146638722541025	-0.9431224479395564	0.8237326998915419
ISR1	apj1d	0.03448599328183876	0.8786080477778478	0.22579120200751543	0.15273399926668046	0.9997008385809374
ISR1	sis14xcga	0.39694247110346764	0.11577773107880215	0.2523882216947028	1.572745623540319	0.9792828732932796
ISR1	ydj14xcga	-0.03364925394996775	0.8822861466179537	0.22724965927848395	-0.14807174653992392	NA
ISR1	apj1dsis14x	-4.771820423805505e-4	0.9983536946783185	0.23126689146784876	-0.0020633391980662713	0.9995467300026422
ISR1	apj1dydj14x	0.19385461729196593	0.38821704346027597	0.22466643342260628	0.8628552754354625	0.8482172909106042
MNN11	apj1d	0.013069912889176298	0.966503757135788	0.3112354292919661	0.041993653868099876	0.9997008385809374
MNN11	sis14xcga	-0.29164042090860753	0.4048984425306957	0.3501485805388539	-0.8329047641997964	0.9792828732932796
MNN11	ydj14xcga	-0.17039747762870713	0.584327084882783	0.31146994893760765	-0.5470751775890921	0.9046168927967994
MNN11	apj1dsis14x	-0.15466807365183327	0.6207221074319591	0.31256987452744095	-0.4948271930737674	0.9995467300026422
MNN11	apj1dydj14x	-0.0789395601231936	0.7996992058145573	0.3111085285688139	-0.253736406669202	0.9694495315065704
SMI1	apj1d	0.06471971709580863	0.5618055305759466	0.11155460468751478	0.580161771691098	0.9997008385809374
SMI1	sis14xcga	0.1221511281213362	0.33156911780467596	0.12580472988347452	0.9709581526424131	0.9792828732932796
SMI1	ydj14xcga	0.004459673474563855	0.9682381923728227	0.11200132589677227	0.03981804178527477	0.9966030424178727
SMI1	apj1dsis14x	0.05607433841659848	0.6202728992787718	0.11317549197311165	0.49546361530215993	0.9995467300026422
SMI1	apj1dydj14x	-0.05622575942199579	0.6152401508428493	0.11186809353753645	-0.5026076483830457	0.9325847919216662
RIC1	apj1d	0.4137771801790053	0.49991471917166397	0.6133449403540461	0.6746239398993938	0.9997008385809374
RIC1	sis14xcga	0.8668786089097428	0.20589849945485925	0.685320594896148	1.2649242053510847	0.9792828732932796
RIC1	ydj14xcga	0.06370549730914497	0.9173400440200171	0.6138223656247324	0.10378490729041322	0.990764062766344
RIC1	apj1dsis14x	0.25324253854128476	0.6800616472318697	0.6141014305357729	0.4123790076833777	0.9995467300026422
RIC1	apj1dydj14x	0.4879940026943591	0.42620125666525865	0.6132820770688245	0.7957088930867203	0.8666913415886589
NOC2	apj1d	0.047080609131391934	0.7208324727073783	0.13175060591895602	0.3573464334604481	0.9997008385809374
NOC2	sis14xcga	-0.24639058409624512	0.0974241521031099	0.14865447699092976	-1.6574716690926086	0.9792828732932796
NOC2	ydj14xcga	-0.031760477088980194	0.8098743335251458	0.13201180844614438	-0.24058815239954248	0.9709689020415607
NOC2	apj1dsis14x	-0.032607626902247305	0.8058693481521086	0.132681697752524	-0.24575828810290462	0.9995467300026422
NOC2	apj1dydj14x	-0.18875399411911098	0.15291936782722568	0.1320608765861889	-1.429295329536311	0.6197814931061981
GAL83	apj1d	0.05564352978487272	0.5586077060600907	0.09513165283840933	0.5849107854710445	0.9997008385809374
GAL83	sis14xcga	0.16989370920569877	0.1174850121032403	0.10852931738825199	1.5654176520609842	0.9792828732932796
GAL83	ydj14xcga	0.07457892213590876	0.4353276506324417	0.09560083705885584	0.7801074177833284	0.8231729076410659
GAL83	apj1dsis14x	0.1497138355670192	0.1252537605346737	0.09765497589366452	1.5330896781956203	0.9995467300026422
GAL83	apj1dydj14x	0.15281056179121905	0.10695300020297593	0.09479321802897235	1.612041082353744	0.5296656678077583
MRPL39	apj1d	-0.15667560077650383	0.5771181134579122	0.28098247832052897	-0.5575991845220225	0.9997008385809374
MRPL39	sis14xcga	0.09220609944969504	0.7695825244626278	0.3147814405341185	0.2929210162239569	0.9872814001744901
MRPL39	ydj14xcga	-0.14096813845168088	0.6161564384271454	0.2812023001322923	-0.5013050689320894	0.9088020730791955
MRPL39	apj1dsis14x	-0.13840388539883047	0.6258551106412198	0.28386518929917137	-0.4875690666422777	0.9995467300026422
MRPL39	apj1dydj14x	-0.30729837474319666	0.27520118209589656	0.281624638466525	-1.0911629622197396	0.7608885937305729
DEP1	apj1d	-0.05655401477348315	0.6953384773777591	0.14441017073217519	-0.3916207181720524	0.9997008385809374
DEP1	sis14xcga	0.0018754254945748438	0.9909640738797699	0.1655990809180515	0.011325096034216026	0.9994389642405372
DEP1	ydj14xcga	-0.03804777378026941	0.7931752326603982	0.1451154682013297	-0.2621896497448697	0.9646129451929448
DEP1	apj1dsis14x	-0.05386583838824763	0.7177589622424619	0.1490248115759518	-0.36145550407755045	0.9995467300026422
DEP1	apj1dydj14x	0.04466521441653637	0.7562233755193235	0.1438752928149013	0.31044395144341524	0.9641436947609254
RPL8A	apj1d	0.07480645673763957	0.4165936969506041	0.09208705277145121	0.812344998414707	0.9997008385809374
RPL8A	sis14xcga	-0.03333612582707469	0.7464869943440364	0.10312002793899959	-0.32327498831550544	0.9872814001744901
RPL8A	ydj14xcga	-0.03902020973285106	0.6719936919454543	0.09215630048183404	-0.42341336977326655	0.9248165943166299
RPL8A	apj1dsis14x	-0.041431888018583884	0.6534851379028284	0.09229115846797954	-0.4489258636076033	0.9995467300026422
RPL8A	apj1dydj14x	-0.15828588422666592	0.08585504448499753	0.09215098681686598	-1.71767975248308	0.48403533092663675
FYV1	apj1d	-0.19897689870946994	0.7741887198908217	0.6935404119605452	-0.2869002227959422	NA
FYV1	sis14xcga	-2.168750253907389	0.04587342108076729	1.0862455639481507	-1.9965561433684336	0.9792828732932796
FYV1	ydj14xcga	-0.8430461150762799	0.25073588947273634	0.7340002462644223	-1.14856380412245	NA
FYV1	apj1dsis14x	-1.759357290054876	0.041848535544539864	0.8645391675955282	-2.035023230871115	NA
FYV1	apj1dydj14x	-0.21770059968013697	0.7544778330666104	0.6961062242388902	-0.3127404871550557	NA
PRS3	apj1d	0.049897150629992004	0.7480132102866524	0.15531693528173734	0.32126020603922556	0.9997008385809374
PRS3	sis14xcga	-0.08507232308905173	0.6256790739603563	0.17439372933190886	-0.48781755751745387	0.9838668840705705
PRS3	ydj14xcga	-0.13170240956062917	0.3975295626240521	0.1556689606055576	-0.8460415554154295	0.8052278527728488
PRS3	apj1dsis14x	0.06957759860375937	0.6554770130859453	0.15594538325373558	0.4461664536137698	0.9995467300026422
PRS3	apj1dydj14x	-0.2046649810471165	0.1883965153664661	0.1555988390671814	-1.3153374554340365	0.6717608497152445
ESF2	apj1d	-0.072004136110024	0.6743643954184846	0.17137080138184987	-0.4201657197691675	0.9997008385809374
ESF2	sis14xcga	-0.17095890950141324	0.37959935851102217	0.1945733574993369	-0.8786347303586816	0.9792828732932796
ESF2	ydj14xcga	0.03174141239458169	0.8531708404138438	0.17150641767901995	0.18507419619705903	0.9814460160950513
ESF2	apj1dsis14x	-0.11031438231293154	0.5261822965922449	0.17404012989090822	-0.6338445183997437	0.9995467300026422
ESF2	apj1dydj14x	-0.34909433422669445	0.04304815384848164	0.17254201485532167	-2.0232424810815717	0.35164877377467124
RPS25B	apj1d	0.002850879557681308	0.9848853720249956	0.15048578990000153	0.01894451004028839	0.9997008385809374
RPS25B	sis14xcga	-0.13467438455575897	0.4242810795913394	0.16855027758259383	-0.7990160947066087	0.9792828732932796
RPS25B	ydj14xcga	0.007393313372859262	0.9608336986738722	0.15055392782638036	0.049107409415350974	0.9964347984369437
RPS25B	apj1dsis14x	-0.040921298883797606	0.7860779625919069	0.1507746221054272	-0.27140707310268647	0.9995467300026422
RPS25B	apj1dydj14x	-0.1242718832513451	0.4091075253704441	0.15054769299697612	-0.8254652115714666	0.8635441645519333
YAR028W	apj1d	-0.269303579117506	0.3632579443709115	0.2962066527473547	-0.9091746475633845	0.9997008385809374
YAR028W	sis14xcga	-0.3328127413743847	0.3275521941156584	0.33993220131556556	-0.9790562355857199	0.9792828732932796
YAR028W	ydj14xcga	0.23293869137164175	0.4243994969772688	0.2916064410465043	0.7988118867871425	NA
YAR028W	apj1dsis14x	-0.01876664904291003	0.9499227990874365	0.2988142637762747	-0.06280372565133241	0.9995467300026422
YAR028W	apj1dydj14x	0.07629993992106796	0.7941057025113489	0.29235610097115045	0.260982889249153	0.9686318264128494
AVT1	apj1d	0.14773581805494693	0.5872074434600112	0.272129841650062	0.5428872377948311	0.9997008385809374
AVT1	sis14xcga	-0.21450836254416591	0.4844070733010443	0.3067771087990539	-0.6992319713289751	0.9803744333627407
AVT1	ydj14xcga	-0.12070250476465351	0.658108390955241	0.2727578003378366	-0.44252631680982885	0.9248165943166299
AVT1	apj1dsis14x	-0.10608499631353417	0.6986512839232268	0.2740210818712139	-0.3871417322678576	0.9995467300026422
AVT1	apj1dydj14x	0.13493430343491455	0.6197159305084134	0.2719062791831646	0.49625298775839805	0.9340876793181656
YSH1	apj1d	4.282393311487677	1.2244452081034262e-4	1.1148641413799716	3.841179523620662	0.07215248970380013
YSH1	sis14xcga	0.9847327391864791	0.4296970492931626	1.246954609138361	0.7897101722627451	0.9792828732932796
YSH1	ydj14xcga	-0.23175109603263344	0.8355284202005705	1.116246042060875	-0.20761649967847748	0.9780624379239289
YSH1	apj1dsis14x	-0.17796606381277302	0.8733709774848232	1.1166279633158003	-0.15937811845971242	0.9995467300026422
YSH1	apj1dydj14x	-0.04281796471759684	0.9693944712648733	1.11598832750219	-0.03836775319454479	0.9962634954535305
RIB2	apj1d	0.13942793255479521	0.3218056958881664	0.14072910811554537	0.990754041021266	0.9997008385809374
RIB2	sis14xcga	0.18825254308474706	0.245981697576406	0.16226361632877384	1.1601648437522507	0.9792828732932796
RIB2	ydj14xcga	0.18146335074088243	0.19908184705125717	0.14130768919084957	1.284171808200747	0.6059298709172379
RIB2	apj1dsis14x	0.024123661239109015	0.8702422730799837	0.14768013225041784	0.16335075593108944	0.9995467300026422
RIB2	apj1dydj14x	0.25996186894631407	0.06326236199458025	0.13996437959113095	1.8573430590391937	0.4162537210042394
TMA16	apj1d	0.07287559526401219	0.6614619143083804	0.16642227861774808	0.4378956703951798	0.9997008385809374
TMA16	sis14xcga	-0.14338246908964933	0.4500016430165997	0.18980690613392204	-0.7554122872035172	0.9792828732932796
TMA16	ydj14xcga	0.11344592097712104	0.4962360657877801	0.16672829105370227	0.6804239416127689	0.86481755038551
TMA16	apj1dsis14x	-0.1449565054940419	0.39416574092998224	0.1701193485228154	-0.8520871185595987	0.9995467300026422
TMA16	apj1dydj14x	0.02251108883172527	0.8925418737609234	0.1666395198268009	0.13508853635153584	0.9859577703565844
COS2	apj1d	-0.15062897963569974	0.8388743083227215	0.740797350936756	-0.20333358299030874	NA
COS2	sis14xcga	-0.15469329236913582	0.8533534495770031	0.8368975138399245	-0.1848413811858024	0.9907292550326111
COS2	ydj14xcga	-0.045241868796241966	0.9511919193336525	0.7391247451903632	-0.06121005837057968	NA
COS2	apj1dsis14x	-0.51064597582541	0.5004394604467783	0.7578616066132108	-0.6737984499669054	NA
COS2	apj1dydj14x	0.00805722267376953	0.991280040710015	0.7372288543332542	0.010929065820485877	0.9996152519634907
SAC6	apj1d	-0.06494339723069874	0.5807013718972109	0.1175742916531119	-0.5523605230155758	0.9997008385809374
SAC6	sis14xcga	-0.040711866050284234	0.7574377176990517	0.1318187707424184	-0.3088472591649152	0.9872814001744901
SAC6	ydj14xcga	0.10479217238136872	0.3726236851051473	0.11753673024445777	0.8915695728766455	0.79497857770015
SAC6	apj1dsis14x	-0.05357901000527383	0.6499499266848137	0.1180591916000166	-0.4538317540475713	0.9995467300026422
SAC6	apj1dydj14x	0.11430007342707874	0.3304268059296315	0.11744108834961281	0.9732545485853851	0.8113301891231126
HBN1	apj1d	-0.14139431546810405	0.6093436287935983	0.27669546043567905	-0.5110106080001003	0.9997008385809374
HBN1	sis14xcga	0.3685879283695899	0.23043529902795376	0.3073516986886018	1.1992382991285517	0.9792828732932796
HBN1	ydj14xcga	-0.5734051100729981	0.04281074036390188	0.2830858853092089	-2.0255517488859587	NA
HBN1	apj1dsis14x	0.07794529820364555	0.780762232687557	0.2800505149081879	0.27832585213849453	0.9995467300026422
HBN1	apj1dydj14x	-0.6469930979186714	0.022270019377119598	0.28305745038441715	-2.285730677782893	0.2396727020136927
TPM2	apj1d	0.031990672866312686	0.8006614228177423	0.12670015475892213	0.2524911901424487	0.9997008385809374
TPM2	sis14xcga	0.068872148975077	0.6296957729503811	0.14284231260768387	0.4821550961880197	0.9838668840705705
TPM2	ydj14xcga	0.24282542010589134	0.05487066805808407	0.12647823135735128	1.9198989225253553	0.31358728947184833
TPM2	apj1dsis14x	0.08878350403632135	0.4882796771347493	0.12810592435954338	0.6930476047863382	0.9995467300026422
TPM2	apj1dydj14x	0.05644816957413266	0.6558036345871158	0.12664653060215264	0.44571429873163215	0.93979732446328
HFM1	apj1d	-0.45641713167445375	0.19470667557955665	0.35196171149185645	-1.2967806348589543	NA
HFM1	sis14xcga	0.7369329666183517	0.04751800237185358	0.37187775689031616	1.981653790699042	0.9792828732932796
HFM1	ydj14xcga	0.36805981838640744	0.272713137777346	0.3355650754591496	1.0968358905729259	NA
HFM1	apj1dsis14x	-0.6263766346188651	0.09771285349518352	0.37823664806224655	-1.6560442723566597	NA
HFM1	apj1dydj14x	0.18590169657320121	0.5815222204781714	0.33729011906106626	0.5511625928761458	0.9173229998800319
RAI1	apj1d	-0.02048231876181907	0.8786902684397345	0.13419611660009853	-0.15262974280288547	0.9997008385809374
RAI1	sis14xcga	-0.03620033650643406	0.8150497551465333	0.15475747495586575	-0.2339165621354173	0.9907292550326111
RAI1	ydj14xcga	-0.02324848827115666	0.8632350990965714	0.13496358060058525	-0.1722574947085825	0.9815368402799278
RAI1	apj1dsis14x	0.1033329493361578	0.452089785440253	0.13742260473925202	0.7519356042786665	0.9995467300026422
RAI1	apj1dydj14x	0.06491442463639904	0.627494291555148	0.13377338098499297	0.48525666435597753	0.9377760907778295
AIM23	apj1d	-0.14842765574741393	0.5883515295303294	0.2742431824636326	-0.5412264196106203	0.9997008385809374
AIM23	sis14xcga	0.43657201143125557	0.1502329038456134	0.30344699379921153	1.4387092980071894	0.9792828732932796
AIM23	ydj14xcga	-0.033662137839925624	0.9021748219938986	0.27386634030660567	-0.12291447646410052	NA
AIM23	apj1dsis14x	0.08207550791300032	0.7684806967269507	0.2788243301137502	0.29436279064856535	0.9995467300026422
AIM23	apj1dydj14x	0.022595648813011966	0.933813625515432	0.272080426315728	0.08304768233048668	0.9957030717003303
UTR4	apj1d	0.06458416393008445	0.6158677957529471	0.12872671624342602	0.5017153067740335	0.9997008385809374
UTR4	sis14xcga	0.04989673014951461	0.735139129339996	0.14749371189752322	0.3382973382904773	0.9872814001744901
UTR4	ydj14xcga	-0.012297402044164686	0.924557682169062	0.1298642898995304	-0.09469425392984154	0.990764062766344
UTR4	apj1dsis14x	-0.009149473749943475	0.9450893901700284	0.13284238274645338	-0.06887465852977367	0.9995467300026422
UTR4	apj1dydj14x	-0.03397380924218394	0.7928820866287829	0.12938957045171598	-0.2625699206170707	0.9683937941554908
MDS3	apj1d	-0.13610488749842592	0.25697618504005826	0.12006778330918133	-1.1335670880834714	0.9997008385809374
MDS3	sis14xcga	-0.020961398139078317	0.8789400942639274	0.1376205709184369	-0.15231297181219686	0.9918802424308719
MDS3	ydj14xcga	-0.25460747543879264	0.03624493406246919	0.12157924379844447	-2.0941689344678274	0.2488267361259555
MDS3	apj1dsis14x	0.06816909722177339	0.5780633402283399	0.12255872159422199	0.5562157987211512	0.9995467300026422
MDS3	apj1dydj14x	0.06369892004598773	0.592319346566379	0.11895711238839077	0.5354780287370545	0.922842985482959
ARG81	apj1d	-0.00415746651913554	0.9832755615000582	0.19832865664400917	-0.02096251035773414	0.9997008385809374
ARG81	sis14xcga	-0.23061297844647652	0.3228695004908925	0.2332773995469134	-0.9885783144633303	0.9792828732932796
ARG81	ydj14xcga	-0.28214702945459935	0.16363068221196475	0.20255156112456954	-1.3929639835314747	NA
ARG81	apj1dsis14x	-0.04122936987431355	0.84089705268646	0.20538060072189818	-0.20074617431926506	0.9995467300026422
ARG81	apj1dydj14x	0.04564923859562886	0.8176528507857078	0.19798868642144501	0.23056488439171943	0.9711255389747546
NBL1	apj1d	-0.5739283564798009	0.13112089873153074	0.38016142798394004	-1.509696445332288	NA
NBL1	sis14xcga	-0.01661784123179107	0.9689543188595374	0.4269763730991232	-0.038919814488033076	0.9994389642405372
NBL1	ydj14xcga	0.1270792660254736	0.7232077872664207	0.3588036694593918	0.3541749342110784	NA
NBL1	apj1dsis14x	0.16380270023164717	0.6607694390380915	0.37325348929675545	0.4388510889483359	NA
NBL1	apj1dydj14x	0.21130398061782088	0.5512161193681652	0.3545732961445901	0.5959387887226962	0.9090262751006709
SNU114	apj1d	-0.11902924106628301	0.4051164135706875	0.14297491243644128	-0.8325183700965497	0.9997008385809374
SNU114	sis14xcga	-0.20650498869653952	0.20674852056828327	0.16356095617147623	-1.2625567466115877	0.9792828732932796
SNU114	ydj14xcga	-0.3481762765713034	0.0161046912407881	0.14467953990144658	-2.40653430891801	0.15269462268128317
SNU114	apj1dsis14x	-0.0900912853111809	0.5364138692784095	0.14572101574116944	-0.6182449720992995	0.9995467300026422
SNU114	apj1dydj14x	-0.13072198850366845	0.3608786727997242	0.14307007032223823	-0.9136920685734056	0.8341466300324768
WHI2	apj1d	-0.23280542148462371	0.07619643651380435	0.13129151063057667	-1.773194781341828	0.9997008385809374
WHI2	sis14xcga	-0.2618161774226734	0.0823287386820319	0.15070021594528987	-1.7373311363914898	0.9792828732932796
WHI2	ydj14xcga	-0.36560541836437394	0.005840595758857312	0.13262917074039327	-2.756598841140352	0.08513890469629447
WHI2	apj1dsis14x	-0.12991787998368393	0.3319397657914834	0.13390639768115042	-0.9702141363927681	0.9995467300026422
WHI2	apj1dydj14x	-0.2634049377689486	0.04519545591898289	0.1315163226395419	-2.0028307702222268	0.35837531578591864
NFT1	apj1d	-1.0145973842961102	0.17021465166448022	0.7397642853484707	-1.3715144193777584	NA
NFT1	sis14xcga	0.7435462995993619	0.35330930791898213	0.8010717020819343	0.9281894462966703	0.9792828732932796
NFT1	ydj14xcga	-0.4247571479379896	0.5604750241121519	0.7296526747859412	-0.5821360801049635	NA
NFT1	apj1dsis14x	-0.7060714989217951	0.3426447664300782	0.7440535664347636	-0.9489525092998816	NA
NFT1	apj1dydj14x	-1.3272040286845461	0.07561367821646801	0.7469950900340291	-1.7767238987127556	0.45394013645995646
RPL6B	apj1d	0.0656229161540052	0.6096327440209	0.12852174680356981	0.5105977609711609	0.9997008385809374
RPL6B	sis14xcga	-0.06133871573703391	0.6698095847725447	0.1438493663617577	-0.4264093564567885	0.9838668840705705
RPL6B	ydj14xcga	0.059681954281943325	0.6424763644538434	0.12855862164865658	0.464239220338335	0.9221855323973673
RPL6B	apj1dsis14x	0.028614998455699828	0.8240262435085836	0.12868220191752502	0.2223695120949185	0.9995467300026422
RPL6B	apj1dydj14x	-0.07133601673592155	0.5789637322165861	0.12855675385640178	-0.5548990200515179	0.9163157532077026
IKI3	apj1d	-0.007852302217005497	0.960515054614973	0.1586091172600333	-0.049507256282953535	0.9997008385809374
IKI3	sis14xcga	-0.21672076290208353	0.22359732374054625	0.17807521538029003	-1.2170181147290131	0.9792828732932796
IKI3	ydj14xcga	-0.173254959630967	0.27551004444968047	0.15888228095137458	-1.0904611804005453	0.6998159048744426
IKI3	apj1dsis14x	0.03302606965690669	0.8355548365006598	0.1590983947019877	0.2075826705779708	0.9995467300026422
IKI3	apj1dydj14x	-0.2011539047111333	0.20521173620138564	0.15878371604865565	-1.2668421530674738	0.6874953846483967
GAT2	apj1d	0.10888418360946156	0.7428282182326744	0.33185231444460467	0.32811036376736596	0.9997008385809374
GAT2	sis14xcga	0.24611734057461304	0.5119333572823898	0.37527598710403715	0.6558302396960516	0.9816226614664663
GAT2	ydj14xcga	0.2026747782916561	0.5416053769408491	0.33204299533031995	0.6103871520916532	NA
GAT2	apj1dsis14x	0.1802142636364453	0.594575691253699	0.33861048111613024	0.532217027194261	0.9995467300026422
GAT2	apj1dydj14x	1.0036761269607	0.001926654834227782	0.3236295743941502	3.1013115190094385	0.05187223245010207
VHT1	apj1d	-0.4199197047419937	0.33972244464941104	0.4398383062813416	-0.9547138090182464	0.9997008385809374
VHT1	sis14xcga	-0.7934776926754334	0.10900226465645471	0.49509000029305095	-1.6026938378997	0.9792828732932796
VHT1	ydj14xcga	-1.3882463215146617	0.0017264422647390628	0.44301198138865155	-3.1336541218662033	0.036156945911528855
VHT1	apj1dsis14x	-0.6126830576398404	0.16500658179228025	0.44127805426852645	-1.3884285695001062	0.9995467300026422
VHT1	apj1dydj14x	-1.392948659575586	0.0016584769591206632	0.4428496020006453	-3.1454215003981334	0.0475640375721725
SMD1	apj1d	0.20683592051404406	0.150649039782095	0.14391161521054294	1.4372427146442819	0.9997008385809374
SMD1	sis14xcga	0.0812280042977092	0.6248447070786259	0.1661118825940287	0.4889957481020634	0.9838668840705705
SMD1	ydj14xcga	-0.022032686706516372	0.8802817763820667	0.1462877015135964	-0.15061202328391624	0.985298545471021
SMD1	apj1dsis14x	0.1254314934407719	0.39903966304827754	0.14873224472737856	0.8433375941490281	0.9995467300026422
SMD1	apj1dydj14x	0.10921582465083621	0.4503172288761518	0.14467851650469307	0.7548862629324339	0.8752680412554995
MNN2	apj1d	0.06260400803587275	0.8615792555588586	0.35904165928570053	0.17436418982805785	0.9997008385809374
MNN2	sis14xcga	-0.33295959255255175	0.40845375281345564	0.4027975349813263	-0.8266177511935066	0.9792828732932796
MNN2	ydj14xcga	-0.26020774128795326	0.4689917541498427	0.3593431449638705	-0.7241205096986486	0.8413775639927311
MNN2	apj1dsis14x	-0.24323095581982077	0.49924941091620273	0.35998418722143005	-0.6756712223867957	0.9995467300026422
MNN2	apj1dydj14x	-0.12941863435110296	0.7185342649230029	0.3590788719922333	-0.36041840510711587	0.9551626960294526
EGD2	apj1d	0.034795696188137173	0.714149687106119	0.0949952852830683	0.36628866458427345	0.9997008385809374
EGD2	sis14xcga	-0.08971886767223723	0.3996487798013958	0.10652301578226442	-0.842248663477804	0.9792828732932796
EGD2	ydj14xcga	0.15657437483517486	0.09936638109500374	0.09501257423349345	1.6479331930360424	0.4413467852931106
EGD2	apj1dsis14x	-0.05090129027142436	0.5933989715941559	0.09533558940649123	-0.5339169830312979	0.9995467300026422
EGD2	apj1dydj14x	-0.031041842869496333	0.74393779244167	0.09503288687789721	-0.32664316416463673	0.9607830961122595
CPR1	apj1d	0.21583136600927444	0.1718128782489562	0.15795600023478157	1.3664018187879439	0.9997008385809374
CPR1	sis14xcga	0.24993839817801167	0.15707190244457972	0.1766363606624844	1.4149883820103852	0.9792828732932796
CPR1	ydj14xcga	0.48715256164411574	0.0020407523152473927	0.15794915418055896	3.084236596083504	0.040926360067597714
CPR1	apj1dsis14x	0.316596137159503	0.04511125341624757	0.15801241369893357	2.003615600497847	0.9995467300026422
CPR1	apj1dydj14x	0.49294440119530847	0.0018014096971388244	0.15793634988676292	3.121158628452154	0.04951061964479988
ADH6	apj1d	-0.2634760231901455	0.020093824526667057	0.11334294478414024	-2.3245912984873582	0.9997008385809374
ADH6	sis14xcga	-0.11953410046095313	0.3470206468660136	0.12711201548088977	-0.9403839598383529	0.9792828732932796
ADH6	ydj14xcga	-0.09922492917696932	0.38129506702794524	0.11333352731659635	-0.8755125824310156	0.7972862343502961
ADH6	apj1dsis14x	-0.2862881626413148	0.012084365877514455	0.11407397698748631	-2.509671094159539	0.9995467300026422
ADH6	apj1dydj14x	-0.1602854365394955	0.15702225708476977	0.113263302017179	-1.4151577226239132	0.6270735882206309
LYP1	apj1d	0.029475698982003324	0.9327366293425142	0.3492288863777626	0.08440223627469154	0.9997008385809374
LYP1	sis14xcga	-0.4266419240245601	0.2757148093760427	0.39141596675775464	-1.0899962195170403	0.9792828732932796
LYP1	ydj14xcga	-0.25383068692454475	0.46746865719664144	0.34933847398411183	-0.7266038693925512	0.8413775639927311
LYP1	apj1dsis14x	-0.12060893846450921	0.7300892402775867	0.34958421094062525	-0.34500682436425567	0.9995467300026422
LYP1	apj1dydj14x	-0.02232527242362956	0.9490112439838224	0.34911337812210275	-0.0639484872900553	0.9958293089450293
ECM11	apj1d	0.7792741747169137	0.4334890082493345	0.994942739232601	0.7832351993622946	NA
ECM11	sis14xcga	0.5290347399329042	0.6501909805614956	1.166567508638683	0.4534968923918147	0.9838668840705705
ECM11	ydj14xcga	0.8694923795467145	0.3820677117743108	0.9947369064457477	0.8740928117902661	NA
ECM11	apj1dsis14x	-0.24977582357377026	0.827132926895636	1.1437661277422408	-0.21838015439993844	NA
ECM11	apj1dydj14x	0.9784467330991612	0.32023359752652125	0.9843746765598504	0.9939779602199784	NA
DNF2	apj1d	-0.04472833039956135	0.8899654254492323	0.3233031500817271	-0.13834795729102725	0.9997008385809374
DNF2	sis14xcga	-0.4233474493242403	0.24391014335389577	0.3633044965439896	-1.1652689502921705	0.9792828732932796
DNF2	ydj14xcga	-0.3959602314354415	0.2213641033102824	0.32378554818658767	-1.222908908853652	0.6344392946358455
DNF2	apj1dsis14x	-0.21615494118622572	0.5050017921724845	0.324245137756878	-0.6666405013243427	0.9995467300026422
DNF2	apj1dydj14x	-0.4629360754999405	0.152814663584491	0.32380854049514096	-1.4296598687361899	0.6197814931061981
CIN10	apj1d	0.10534679253636696	0.7192877542320586	0.29310965602996353	0.3594108565485053	0.9997008385809374
CIN10	sis14xcga	-0.17500827796427704	0.6255499102730941	0.35862359221586626	-0.4879999023012806	0.9838668840705705
CIN10	ydj14xcga	0.24396567992343043	0.4048510447573502	0.29287990347024495	0.8329888020064035	NA
CIN10	apj1dsis14x	-0.3096005168566958	0.3400105419375383	0.32447972141755105	-0.9541444238923388	NA
CIN10	apj1dydj14x	0.34503998567261507	0.23294953275238112	0.28927006336220346	1.1927953472343265	0.7214053311821098
TAF2	apj1d	0.09843279952760031	0.3881602877883739	0.11406434977358319	0.8629584942445964	0.9997008385809374
TAF2	sis14xcga	-0.10658566369388296	0.41618415320749697	0.13109214177600567	-0.813059137259376	0.9792828732932796
TAF2	ydj14xcga	-0.09590686190242974	0.40530441869254735	0.11524701757348363	-0.8321851959533595	0.8065199966221102
TAF2	apj1dsis14x	0.04877436741037407	0.6757917141597897	0.11662578359253734	0.41821255907510185	0.9995467300026422
TAF2	apj1dydj14x	0.06967762469357626	0.5417302765381424	0.1141884429935119	0.6101985705990867	0.9048568413663863
FIR1	apj1d	-0.24534006253610857	0.09092106841468953	0.14512363560194513	-1.690558960423537	0.9997008385809374
FIR1	sis14xcga	-0.2332250428725319	0.1736212241120743	0.1714058450649983	-1.3606598000441077	0.9792828732932796
FIR1	ydj14xcga	-0.14883013934958259	0.30545108721071546	0.14522652765979355	-1.0248137289230714	0.7309143845763896
FIR1	apj1dsis14x	-0.22016138631710958	0.14822348779741	0.15227282982730758	-1.4458349960842938	0.9995467300026422
FIR1	apj1dydj14x	-0.05671788975812359	0.6925361252081732	0.14343863925281455	-0.3954156986818367	0.9499095540447087
RPL24A	apj1d	0.030983963145069772	0.8341264904072996	0.1479568385923047	0.20941217344097307	0.9997008385809374
RPL24A	sis14xcga	-0.12854416609365638	0.43744941472403487	0.1655414427397916	-0.7765074652376333	0.9792828732932796
RPL24A	ydj14xcga	-0.06290945760557905	0.6707787521674122	0.14799458414075536	-0.4250794579465613	0.9248165943166299
RPL24A	apj1dsis14x	-0.0935161940906413	0.5277183102949323	0.1480874902269139	-0.6314928691636734	0.9995467300026422
RPL24A	apj1dydj14x	-0.14874492629423383	0.31483703220118375	0.14798660827858434	-1.0051242340402988	0.8021527424451121
CTF13	apj1d	0.18034170088709375	0.5204890770912469	0.2806474218259913	0.6425916892937299	0.9997008385809374
CTF13	sis14xcga	0.03190210114699404	0.9240550436764784	0.33465941977320623	0.09532706764570865	0.9968228537734142
CTF13	ydj14xcga	0.19764028929777647	0.4839357153850445	0.28234870283207125	0.6999865319562822	NA
CTF13	apj1dsis14x	-0.021905765931970626	0.9418847205803076	0.30048557454913916	-0.07290122317798095	NA
CTF13	apj1dydj14x	0.3109551690738129	0.2643535101797969	0.27859363899696055	1.11616033371532	0.7486522920899581
YDL144C	apj1d	0.05521176663367725	0.6799647378346678	0.13384305726763912	0.41251124832925107	0.9997008385809374
YDL144C	sis14xcga	0.11200188886717352	0.46744175027947626	0.1541350457166152	0.7266477804995397	0.9792828732932796
YDL144C	ydj14xcga	0.1357638994332689	0.311387596329888	0.1341123427568652	1.0123147254194031	0.7349369160168326
YDL144C	apj1dsis14x	0.12703489190878112	0.35786621310732525	0.13816571705539957	0.9194385887914918	0.9995467300026422
YDL144C	apj1dydj14x	0.14645792250816372	0.27211404828925495	0.13336092701078472	1.0982071420088424	0.7557609646433675
SAP4	apj1d	-0.19749588922807498	0.5578443120302103	0.336996999034799	-0.5860464330356875	0.9997008385809374
SAP4	sis14xcga	0.4334354895349147	0.24435638505803292	0.3723138778199955	1.164166890777222	0.9792828732932796
SAP4	ydj14xcga	0.20424698728885135	0.5391267926410351	0.3325772428666298	0.6141339844192482	NA
SAP4	apj1dsis14x	0.20778179033265268	0.5401941386296214	0.3392248082287699	0.6125194422470619	0.9995467300026422
SAP4	apj1dydj14x	-0.005369357944728849	0.9871820682893208	0.33421488101771435	-0.01606558609352962	0.9993291630888508
PSF1	apj1d	-0.32840684562636846	0.10870529582453224	0.20473735149431901	-1.6040397281171286	0.9997008385809374
PSF1	sis14xcga	-0.09729601803592317	0.6810979650172566	0.23674994821779594	-0.41096531918316026	0.9838668840705705
PSF1	ydj14xcga	-0.14088751973594346	0.4883991795874808	0.20334279899160515	-0.6928571871471086	NA
PSF1	apj1dsis14x	-0.12260270315000059	0.5624148315282705	0.2116545973900847	-0.5792583986448485	0.9995467300026422
PSF1	apj1dydj14x	0.05873145874385575	0.768149802180803	0.1992275322113531	0.2947958953863351	0.9665870595653628
CTP1	apj1d	0.31163345244430923	0.2260464944550456	0.2574194135554926	1.2106058674441413	0.9997008385809374
CTP1	sis14xcga	-0.03997057221613186	0.8926575582803887	0.29620508903179926	-0.13494221975315487	0.9939508895093903
CTP1	ydj14xcga	-0.11286416698448291	0.6661567694394305	0.26160567713835337	-0.4314285844981618	NA
CTP1	apj1dsis14x	0.12170082533311805	0.6443713257592516	0.2636524616800345	0.46159563448648067	0.9995467300026422
CTP1	apj1dydj14x	-0.31797356180183234	0.22621191934989204	0.26275016300239423	-1.2101745558153465	0.7126688348712719
JJJ3	apj1d	-0.03458442419431045	0.8714001755682419	0.2136420566046215	-0.16188022500791788	0.9997008385809374
JJJ3	sis14xcga	-0.168040174544168	0.5067935370640008	0.2531340339559518	-0.6638387257456217	0.9816226614664663
JJJ3	ydj14xcga	-0.03851934257372065	0.857956554563217	0.21522072651558108	-0.17897598989348273	NA
JJJ3	apj1dsis14x	0.06865581093156352	0.7560902919858501	0.2210290227979279	0.3106189859705933	0.9995467300026422
JJJ3	apj1dydj14x	-0.08305647894225747	0.6988830112799607	0.21471125054968873	-0.3868287233650872	0.9509250161207286
6	apj1d	-0.07197077666256704	0.5598076918693188	0.12342209363274433	-0.5831271739460506	0.9997008385809374
6	sis14xcga	0.024430103890266373	0.86274882295398	0.14131568644641387	0.17287609397510256	0.9907292550326111
6	ydj14xcga	-0.0597233042901798	0.6302986644522917	0.12408579962640459	-0.48130651911817235	0.9143613681160163
6	apj1dsis14x	-0.02900934177303014	0.8195814717892825	0.12718747931444294	-0.22808331393462838	0.9995467300026422
6	apj1dydj14x	-0.19357751458019695	0.11952320955788268	0.12434497302861713	-1.5567779691073351	0.5570664040045297
YMR244W	apj1d	-0.5373937405492696	0.5762377546380937	0.9615400045281541	-0.558888593317528	NA
YMR244W	sis14xcga	1.1834154884380645	0.22917225891362564	0.9841343617406669	1.2024938204016404	0.9792828732932796
YMR244W	ydj14xcga	-0.0942345793602403	0.9200346923591209	0.9386847322440847	-0.10039002033723995	NA
YMR244W	apj1dsis14x	-0.8347508994277744	0.4255665942277968	1.0476277807365522	-0.7968010344674984	NA
YMR244W	apj1dydj14x	-0.5038366080729481	0.6002482539839262	0.9614403494218028	-0.524043544018044	NA
ADE17	apj1d	0.35491507898245667	0.318522477336397	0.35580503419442394	0.9974987559858949	0.9997008385809374
ADE17	sis14xcga	0.005294914346466959	0.9893940204755067	0.3983230384378208	0.013293015556501656	0.9994389642405372
ADE17	ydj14xcga	0.8538922917702587	0.016343393595108894	0.3556172526157324	2.4011554149566106	0.15363718581311173
ADE17	apj1dsis14x	-0.10363972011596202	0.7712841648457962	0.35652322592592406	-0.2906955636531113	0.9995467300026422
ADE17	apj1dydj14x	-0.052325596910540007	0.8831583099476636	0.3560371118498682	-0.1469666929907138	0.9830049360037589
RPL42A	apj1d	0.013254340240781952	0.9361540970701829	0.16546299552918603	0.08010455871653803	0.9997008385809374
RPL42A	sis14xcga	-0.1421007544365836	0.4427552413116048	0.1851357713606369	-0.7675488825969625	0.9792828732932796
RPL42A	ydj14xcga	-0.05991662659848849	0.7173369048547309	0.16550628896127573	-0.3620202408895015	0.9411847018890978
RPL42A	apj1dsis14x	-0.014403770041729018	0.930684277140416	0.1655911414994138	-0.08698394075494677	0.9995467300026422
RPL42A	apj1dydj14x	-0.11820379722615217	0.4750641064010305	0.16549040616160507	-0.7142637447558351	0.8814917494414021
VAM3	apj1d	-0.06529153373860923	0.7974887130499018	0.25445015127002996	-0.2565985259302123	0.9997008385809374
VAM3	sis14xcga	-0.28767390450299074	0.3382898805951927	0.300427130533423	-0.9575496859827929	0.9792828732932796
VAM3	ydj14xcga	-0.04122307508666928	0.8719873269274981	0.2558299383248113	-0.1611346793756832	NA
VAM3	apj1dsis14x	-0.016517876391043972	0.9498540200626293	0.2626466959655892	-0.062890097780663	0.9995467300026422
VAM3	apj1dydj14x	-0.11104137989681666	0.663787861576169	0.25544991128658445	-0.434689443960078	0.9423456245356574
IES2	apj1d	0.16114804355305026	0.33226226089473343	0.16620615971339697	0.969567215986045	0.9997008385809374
IES2	sis14xcga	0.11892257001619302	0.529311746466941	0.18904896029219978	0.6290569904874521	0.9816226614664663
IES2	ydj14xcga	0.08923006972380841	0.5936233203521162	0.16722503917034584	0.533592757200153	0.9078405176517683
IES2	apj1dsis14x	0.15088551132401745	0.3736249508018662	0.16959072290580074	0.8897038041864288	0.9995467300026422
IES2	apj1dydj14x	0.16047277853716	0.3344884385630997	0.16627364084257265	0.9651125561693517	0.8162516828104168
NRD1	apj1d	-0.00578640764212784	0.9673616297180028	0.1414162932712165	-0.040917545696310446	0.9997008385809374
NRD1	sis14xcga	0.006010044843382459	0.969959608052886	0.15959141906196422	0.03765894732127767	0.9994389642405372
NRD1	ydj14xcga	-0.01942700458001045	0.891072610914177	0.14185773122833065	-0.13694709771398522	0.9862146386048681
NRD1	apj1dsis14x	-0.07753022396244467	0.5889364091541719	0.14347406950292682	-0.5403779528318396	0.9995467300026422
NRD1	apj1dydj14x	0.07335656031328688	0.6036011529968415	0.14127981972222062	0.5192288640905541	0.9269619296354898
MBP1	apj1d	0.21261220693094562	0.16955367966674098	0.15478022641457898	1.373639332723701	0.9997008385809374
MBP1	sis14xcga	0.219945683996557	0.21951736745456177	0.17913621707114671	1.227812485898383	0.9792828732932796
MBP1	ydj14xcga	0.230105561168307	0.139254190435858	0.15562667284640036	1.4785740577736017	0.5261133039861348
MBP1	apj1dsis14x	0.11899912627496702	0.46336924748744057	0.16227665208291597	0.7333102128220139	0.9995467300026422
MBP1	apj1dydj14x	0.3191372744980021	0.03828781302907816	0.15404161127751945	2.071760168251216	0.3288426062441514
MTQ1	apj1d	0.08060745081308354	0.7977382466538656	0.3145345727953352	0.25627532800832703	0.9997008385809374
MTQ1	sis14xcga	0.35634896836683877	0.3158911086519619	0.3553053258741622	1.0029373117053872	0.9792828732932796
MTQ1	ydj14xcga	-0.13519482270180497	0.6735144237974068	0.32087663665114863	-0.42132959293258354	NA
MTQ1	apj1dsis14x	0.3569018953443883	0.26487468686946125	0.3201076419386168	1.1149433771182105	NA
MTQ1	apj1dydj14x	0.1766990644401452	0.5727432183613737	0.31328730566348395	0.5640160365448884	0.9154926072683456
YOL163W	apj1d	0.500254581196321	0.7399222131040006	1.5069890020054204	0.3319563583613477	NA
YOL163W	sis14xcga	0.6444436643084694	0.705737089693514	1.706740161948971	0.3775874492650143	0.9856785420334242
YOL163W	ydj14xcga	-0.1421189698046705	0.9279916450846767	1.572600433562553	-0.0903719513053393	NA
YOL163W	apj1dsis14x	-1.7649621609104997	0.32642975623692777	1.798539889954735	-0.9813305619565211	NA
YOL163W	apj1dydj14x	1.3210451106699252	0.3680962942810676	1.4677544847492339	0.9000450173351887	NA
FUS2	apj1d	0.48937482875013694	0.45956587707252494	0.6617091005026133	0.7395618835805995	NA
FUS2	sis14xcga	-0.29348831536853054	0.7224889477351863	0.8264149029103157	-0.35513434515154246	0.9872814001744901
FUS2	ydj14xcga	-0.11162257546221169	0.8723745981388039	0.69484874242599	-0.16064298407232258	NA
FUS2	apj1dsis14x	1.093008375327415	0.09823492476247306	0.6610384999872342	1.6534715834985751	NA
FUS2	apj1dydj14x	0.021331857986714466	0.9751280909801728	0.6842097705962904	0.031177365339468483	NA
OSH7	apj1d	0.16640751267489598	0.08170991837481889	0.09558981896008588	1.740849752465589	0.9997008385809374
OSH7	sis14xcga	0.15816046321591565	0.15263492180483526	0.11057959867095418	1.4302861026521294	0.9792828732932796
OSH7	ydj14xcga	0.2817558937328083	0.0031964346706490846	0.09556920142366515	2.948187172599299	0.055396314854025686
OSH7	apj1dsis14x	0.15735629597549466	0.11296020223881613	0.09927672967684895	1.5850269895845461	0.9995467300026422
OSH7	apj1dydj14x	0.27620378854209193	0.003694283144133524	0.09513930766355395	2.903151129907794	0.08191063929240591
UBP13	apj1d	-0.23579779406523582	0.05903174134643903	0.12489575281310188	-1.8879568660600607	0.9997008385809374
UBP13	sis14xcga	-0.14005590068273174	0.33267358456944673	0.1445749231335218	-0.9687426951172126	0.9792828732932796
UBP13	ydj14xcga	-0.30267165455641776	0.016585100216643056	0.1263353974469584	-2.395778702350572	0.1546022523972184
UBP13	apj1dsis14x	-0.04670889011384505	0.7156272488133775	0.12821227245251515	-0.36430904171942047	0.9995467300026422
UBP13	apj1dydj14x	-0.19185957822009114	0.12404903975273358	0.12474629066173072	-1.53799826193108	0.5687287426369897
PET112	apj1d	0.08258136193812846	0.7410492702038087	0.24989506370192302	0.33046415849427185	0.9997008385809374
PET112	sis14xcga	0.1936606010187339	0.49820259017185936	0.28592163454887953	0.6773205578664485	0.9816226614664663
PET112	ydj14xcga	-0.13784955617978803	0.5885114411886372	0.25480773120922895	-0.5409944020363979	NA
PET112	apj1dsis14x	0.29226428561590484	0.2521444171631359	0.25521781233745605	1.1451562997862583	0.9995467300026422
PET112	apj1dydj14x	-0.18241528894616305	0.47294346023225925	0.2541671645416787	-0.7176980916283949	0.8803953092002985
UTR2	apj1d	0.14149304772768564	0.6337657951640305	0.2969840288313413	0.47643318829121367	0.9997008385809374
UTR2	sis14xcga	-0.38666630183821177	0.244986085853583	0.33258351516145995	-1.1626141531714107	0.9792828732932796
UTR2	ydj14xcga	0.26176319603567305	0.37795556263946467	0.2968949225502125	0.8816694936620286	0.7972043270186695
UTR2	apj1dsis14x	-0.17568572521569875	0.5545468796677763	0.2972884342551283	-0.5909605116522226	0.9995467300026422
UTR2	apj1dydj14x	0.21944149037907795	0.4598259886843626	0.29689023146536647	0.7391334140432194	0.8778060958687229
YPR096C	apj1d	0.12009599032960312	0.9293759062713702	1.3550252691760862	0.08863007433258176	NA
YPR096C	sis14xcga	1.0594958190288308	0.4681065400690694	1.4602390329589747	0.7255632777339937	0.9792828732932796
YPR096C	ydj14xcga	-0.36742429860493564	0.7943086286083572	1.4092691023982764	-0.2607197574825543	NA
YPR096C	apj1dsis14x	-0.05658516283300227	0.9683713704828819	1.4270804922424187	-0.03965099596035269	NA
YPR096C	apj1dydj14x	-0.6823264386578616	0.6353460340923756	1.4388522104082526	-0.47421579069907516	NA
VTS1	apj1d	0.003166698759267507	0.9853614885094264	0.17259393457547662	0.018347682767975174	0.9997008385809374
VTS1	sis14xcga	-0.17960550335758524	0.3679798007529864	0.1995031604614013	-0.9002639504166364	0.9792828732932796
VTS1	ydj14xcga	-0.018318051287227372	0.9160003138437992	0.17367489306986553	-0.10547322622999071	0.990764062766344
VTS1	apj1dsis14x	-0.1305420933049639	0.463783335408922	0.1781825227880425	-0.7326312999858612	0.9995467300026422
VTS1	apj1dydj14x	0.0027700753359867244	0.9872091959791887	0.17278864318201656	0.016031582197614174	0.9993291630888508
FAA4	apj1d	-0.10881888841764438	0.31808468933985484	0.10899311003346425	-0.9984015355120486	0.9997008385809374
FAA4	sis14xcga	-0.21207156667043994	0.08287480903446662	0.12228473824932372	-1.7342439433288215	0.9792828732932796
FAA4	ydj14xcga	-0.36882820775882613	7.353127920069698e-4	0.10924804698081202	-3.3760622542168277	0.021157826336965765
FAA4	apj1dsis14x	-0.08297078524382172	0.4479827938515691	0.10934728570953473	-0.7587823026921915	0.9995467300026422
FAA4	apj1dydj14x	-0.38745340773338266	3.865749125538769e-4	0.10916999844722848	-3.549083202750737	0.01619012550433975
FMP46	apj1d	-0.24356423160570112	0.37015311231343073	0.27177848024937784	-0.8961865979315656	0.9997008385809374
FMP46	sis14xcga	-0.1224639976194057	0.6941487259440453	0.31143001079651755	-0.3932312024335424	0.9854540024253493
FMP46	ydj14xcga	-0.3355802765380466	0.2222328346056873	0.27492781083624507	-1.220612332805894	NA
FMP46	apj1dsis14x	0.16879993819150915	0.5379821524998346	0.27408494963537583	0.6158672280841003	0.9995467300026422
FMP46	apj1dydj14x	-0.12542043933172334	0.6429843605998191	0.2705766196854817	-0.4635302173466136	0.9397423432890535
GLO3	apj1d	0.0032237026104942174	0.9765096590407734	0.10948205969068824	0.029445030716465436	0.9997008385809374
GLO3	sis14xcga	0.03337135002687235	0.7868727687256838	0.12342675941951355	0.2703737032700253	0.988251993958159
GLO3	ydj14xcga	-0.0071667370819600736	0.947943589839855	0.10976878597252233	-0.06528939004348716	0.9942220709878937
GLO3	apj1dsis14x	0.03256324193298477	0.7686897787867536	0.11072574943826842	0.294089153590596	0.9995467300026422
GLO3	apj1dydj14x	-0.018629463385834048	0.864958779735321	0.10954299904991346	-0.17006530355577995	0.9786792219748118
YCR018C-A	apj1d	-1.522320939689044	0.3151695177937907	1.5156009196695859	-1.0044338980877123	NA
YCR018C-A	sis14xcga	-1.2554336556928345	0.4892515807297122	1.8155231145685613	-0.6914996816172039	0.9816226614664663
YCR018C-A	ydj14xcga	0.771923876670067	0.5265913059789846	1.2190492078552435	0.6332179797960457	NA
YCR018C-A	apj1dsis14x	-0.9229864754545132	0.541716334818205	1.5125480167426029	-0.6102196196337891	NA
YCR018C-A	apj1dydj14x	1.4533713513533906	0.21662917085453673	1.1763034758581503	1.2355411517364687	NA
CSM1	apj1d	-0.0897854459116766	0.6516869059908157	0.1988956082054398	-0.451419952012902	0.9997008385809374
CSM1	sis14xcga	-0.13133750288686435	0.5747909829493996	0.23410918370509962	-0.5610096144383054	0.9838668840705705
CSM1	ydj14xcga	-0.1713473173539057	0.39533534650351065	0.2015894559984295	-0.8499815454397605	NA
CSM1	apj1dsis14x	0.009915476815820256	0.9616488507638994	0.20620915893618738	0.04808456068087964	0.9995467300026422
CSM1	apj1dydj14x	-0.09787522638287638	0.6235230079845588	0.1993939868608059	-0.4908634805080741	0.9357701870396211
TRI1	apj1d	-0.045195294184828295	0.8366320536159664	0.2191782493459433	-0.20620337245916048	0.9997008385809374
TRI1	sis14xcga	0.1915680571962289	0.44275171528843443	0.24958224911575186	0.7675548155966132	0.9792828732932796
TRI1	ydj14xcga	-0.49379366999820834	0.030472120461610786	0.22819629092654817	-2.1638987557302176	NA
TRI1	apj1dsis14x	-0.03024612239048019	0.8945606674481666	0.22821130791186583	-0.13253559899039316	0.9995467300026422
TRI1	apj1dydj14x	-0.324962675923613	0.1465824134189192	0.22384829016180124	-1.4517094398564518	0.6101835639403773
MEO1	apj1d	0.2233958204381078	0.16593998167930704	0.1612537796961842	1.3853679638331855	0.9997008385809374
MEO1	sis14xcga	0.4217772283994591	0.019568298685422404	0.18066947302338116	2.334524041838962	0.9446495647983034
MEO1	ydj14xcga	0.1884923687894754	0.24397260091603012	0.16178010819039962	1.1651146169814526	0.6658336645982784
MEO1	apj1dsis14x	0.21947928793361066	0.1788551699562957	0.16326801633152724	1.3442883233660563	0.9995467300026422
MEO1	apj1dydj14x	0.38593613501386737	0.01641297738945404	0.16083350057483178	2.3996004167943914	0.2041358200586659
CAN1	apj1d	0.07643122353299575	0.8166474643124164	0.3296451534559365	0.23185908462995886	0.9997008385809374
CAN1	sis14xcga	-0.31803673110109093	0.3907531656920379	0.3705632170298668	-0.8582522940355888	0.9792828732932796
CAN1	ydj14xcga	0.18313523207891563	0.5780051068109653	0.3292016976312577	0.5563009953978043	0.9040838004017948
CAN1	apj1dsis14x	-0.025140340404500243	0.9393482476667276	0.33040678942714247	-0.07608905509504944	0.9995467300026422
CAN1	apj1dydj14x	0.36032266798765983	0.27323195003520406	0.32886656484986043	1.095650049290235	0.7571598131507448
YNR021W	apj1d	0.025048848652781872	0.9438488249376534	0.35563952544919025	0.07043325294381704	0.9997008385809374
YNR021W	sis14xcga	-0.4359029019689988	0.2742355178544996	0.39868174625885283	-1.0933605715822747	0.9792828732932796
YNR021W	ydj14xcga	-0.1367901904628088	0.700550307919753	0.3556893323488942	-0.3845777143764094	0.9334522926831316
YNR021W	apj1dsis14x	-0.13257485140448655	0.7096634033122422	0.35608900323380216	-0.37230818756129935	0.9995467300026422
YNR021W	apj1dydj14x	-0.007859359324707847	0.9823633559167779	0.3555296989879042	-0.02210605568840323	0.9984122407920013
YHL018W	apj1d	0.14465563716091362	0.6561303754863388	0.32487752045159607	0.4452620697173354	NA
YHL018W	sis14xcga	0.1464862339228378	0.699169487695873	0.37906414029850566	0.38644181379827364	0.9854540024253493
YHL018W	ydj14xcga	0.14154389041125587	0.6654298988204772	0.3273231094266141	0.4324286502691618	NA
YHL018W	apj1dsis14x	0.19191839174341574	0.5705950761561229	0.3383757826615101	0.5671753168441102	NA
YHL018W	apj1dydj14x	0.24465652390135237	0.4492783057763563	0.32335509057828044	0.7566187483358142	0.8752680412554995
HO	apj1d	0.10335082678317142	0.4635755076827592	0.14100242150828649	0.7329719991872456	0.9997008385809374
HO	sis14xcga	-0.01800293488581946	0.9097584668154259	0.15883559313975057	-0.11334320305638097	0.9968228537734142
HO	ydj14xcga	-0.6693712132398357	2.8604710882668485e-6	0.14300993372269144	-4.680592430297913	2.7043710945928576e-4
HO	apj1dsis14x	0.03202645307759593	0.8218550786774504	0.1422388655308461	0.22515964928481966	0.9995467300026422
HO	apj1dydj14x	-0.5546403147509572	9.791747420441223e-5	0.14237261633773476	-3.8956951766289487	0.005830741856038191
OCA2	apj1d	-0.13337074906051338	0.4670614470555055	0.18338582787873575	-0.7272685714225696	0.9997008385809374
OCA2	sis14xcga	0.07942437321081955	0.7029373582761336	0.20826703333534266	0.38135835489111625	0.9854540024253493
OCA2	ydj14xcga	0.07717602961587838	0.6724564228295721	0.1825445626180479	0.42277912039133014	0.9248165943166299
OCA2	apj1dsis14x	-0.09076782493297374	0.6310258492843314	0.18898803054574434	-0.4802834585389443	0.9995467300026422
OCA2	apj1dydj14x	0.08279238478134283	0.6486264018002623	0.18169323934921683	0.4556712460952648	0.93979732446328
CHA4	apj1d	0.11270009335011293	0.748008524654413	0.350799514023143	0.3212663896184242	0.9997008385809374
CHA4	sis14xcga	0.23410281119813023	0.5549681746311079	0.39656136109639817	0.590331873359753	0.9838668840705705
CHA4	ydj14xcga	0.6455170327032835	0.06272728569482273	0.34684338651391716	1.861119622868698	NA
CHA4	apj1dsis14x	0.07984944372744379	0.8240434981207689	0.35912029260352973	0.222347345365966	0.9995467300026422
CHA4	apj1dydj14x	0.022847184599060093	0.9482632928539481	0.35210264895734344	0.06488785207017282	0.9958293089450293
IDP1	apj1d	0.04027854867780519	0.8240476403481694	0.18115580656439764	0.22234202392782199	0.9997008385809374
IDP1	sis14xcga	0.06845219873932212	0.7356602940365691	0.2027577873085231	0.3376057691691168	0.9872814001744901
IDP1	ydj14xcga	0.2857135773675511	0.11449998375952866	0.1810277903159198	1.5782857254620375	0.4753832449940782
IDP1	apj1dsis14x	0.12945771387870703	0.4755199661379238	0.18143362271072402	0.7135265886473156	0.9995467300026422
IDP1	apj1dydj14x	-0.22100957790833917	0.22285389422348492	0.18130780335303848	-1.2189744391640678	0.70800722445354
1	apj1d	0.1593385183981797	0.21265294699154044	0.1278488764768599	1.2463036265087497	0.9997008385809374
1	sis14xcga	0.12119521576472835	0.40397917783175147	0.14522472260310637	0.8345357015826448	0.9792828732932796
1	ydj14xcga	0.005876471204882502	0.9636361740152842	0.12889517891152583	0.04559108614074802	0.9966030424178727
1	apj1dsis14x	0.24304036609136817	0.06115648228911886	0.12980412617787979	1.8723624067104983	0.9995467300026422
1	apj1dydj14x	0.23226470327614646	0.06871595510346458	0.12759814470006717	1.8202827621209463	0.43058269263430093
MTC4	apj1d	-0.24217747469311673	0.243182619305871	0.20750918161677623	-1.1670687186283892	0.9997008385809374
MTC4	sis14xcga	-0.10254151228926282	0.6728981945384298	0.24288935638950504	-0.4221737576875292	0.9838668840705705
MTC4	ydj14xcga	0.061956017183633944	0.7615965158558926	0.2042158576443287	0.3033849471745689	NA
MTC4	apj1dsis14x	0.0019008059680415725	0.9929136228220213	0.21401680407178555	0.008881573464689266	0.9995467300026422
MTC4	apj1dydj14x	0.25409875919757224	0.2047054343550065	0.2003524021672974	1.2682591096931086	0.6874953846483967
GPI14	apj1d	0.1746472075701103	0.6905748356438441	0.43872930503856505	0.39807508995725394	0.9997008385809374
GPI14	sis14xcga	0.027015842201060306	0.9563590736096756	0.4936826868919952	0.05472309019208256	0.9994389642405372
GPI14	ydj14xcga	0.025924960266048205	0.9529202103277395	0.4391080513047182	0.05904004763524053	NA
GPI14	apj1dsis14x	-0.3013018812612148	0.4980320223829882	0.4446672995248805	-0.6775894732604597	0.9995467300026422
GPI14	apj1dydj14x	0.061322103115225894	0.8888079610696549	0.43860173877730124	0.13981272232566777	0.9859577703565844
HOT1	apj1d	0.03768004254925446	0.8192236661946771	0.16487026026661633	0.2285435983925846	0.9997008385809374
HOT1	sis14xcga	0.12813992691297207	0.5048516660486471	0.19214970148335989	0.6668754930335864	0.9816226614664663
HOT1	ydj14xcga	0.251570964447097	0.12395444496303831	0.16352923520456764	1.5383852565102083	NA
HOT1	apj1dsis14x	0.1572020335766211	0.35941127133115086	0.17152665700581002	0.9164874796766797	0.9995467300026422
HOT1	apj1dydj14x	0.02039981340803734	0.9019301366881083	0.16555135594943268	0.12322347522341297	0.9859577703565844
YNL034W	apj1d	0.1282704974734494	0.8856945803739201	0.8922905135219361	0.1437541871505014	NA
YNL034W	sis14xcga	0.1946480628035509	0.8497013646581826	1.0271693910899191	0.18949947739098008	0.9907292550326111
YNL034W	ydj14xcga	-0.6443311371620486	0.49853761713101824	0.9520364613831112	-0.6767925003901314	NA
YNL034W	apj1dsis14x	-0.40739440197520843	0.6751770786805812	0.9721776870089761	-0.41905343788398114	NA
YNL034W	apj1dydj14x	-0.4886403446244034	0.6006190032748853	0.933391569459878	-0.5235105614968892	NA
NTE1	apj1d	-0.16387696743510766	0.6669917200856474	0.380860915127651	-0.4302803488779675	0.9997008385809374
NTE1	sis14xcga	-0.46318291531726585	0.2798097532215591	0.42857671171006917	-1.0807468130247069	0.9792828732932796
NTE1	ydj14xcga	-0.26274064220980936	0.4903299146863245	0.3809026756143921	-0.6897841864355807	0.8593758939073345
NTE1	apj1dsis14x	-0.3624621817349929	0.343456211188195	0.3826030402643895	-0.9473583416496671	0.9995467300026422
NTE1	apj1dydj14x	-0.10467102683428652	0.7831461956385538	0.38031581491991	-0.2752213363946724	0.9665870595653628
EXO1	apj1d	-0.06840433438673935	0.7200460890050409	0.19086180070658776	-0.35839719699541905	0.9997008385809374
EXO1	sis14xcga	0.2411788737274815	0.2639471227280844	0.2158952892494601	1.117110403686516	0.9792828732932796
EXO1	ydj14xcga	-0.0615365824261417	0.74872802630123525	0.19211150084217352	-0.32031701463149886	NA
EXO1	apj1dsis14x	0.17023840328545894	0.382983540131982	0.19513528205159492	0.8724122131867824	0.9995467300026422
EXO1	apj1dydj14x	0.047997909372706656	0.8003753902675947	0.189819114216507	0.2528613073073369	0.9694495315065704
RKM1	apj1d	-0.0042900309188019705	0.9716439412429683	0.12068774272624844	-0.035546533739825505	0.9997008385809374
RKM1	sis14xcga	-0.2132040262593625	0.13996590886320023	0.14445519833566567	-1.4759179919849439	0.9792828732932796
RKM1	ydj14xcga	-0.20939269450854636	0.08971162867599955	0.12339567667008704	-1.6969208335263037	0.4142943723874562
RKM1	apj1dsis14x	-0.009165141080325087	0.9420805702064502	0.12614585450992458	-0.07265511114837321	0.9995467300026422
RKM1	apj1dydj14x	-0.019324559491123133	0.8731453843607031	0.1210323031231791	-0.1596644779324393	0.9798000556687592
MSI1	apj1d	-0.09314468752768518	0.5429382490335293	0.15310386351919636	-0.6083758135600973	0.9997008385809374
MSI1	sis14xcga	-0.07521877567676766	0.6746897750795395	0.17921165863386268	-0.41972032539714915	0.9838668840705705
MSI1	ydj14xcga	-0.15053575311930167	0.3311701323896134	0.15491047881260583	-0.9717596528857403	NA
MSI1	apj1dsis14x	-0.15463699445672185	0.3375280857278917	0.16123793666244257	-0.9590608615915247	0.9995467300026422
MSI1	apj1dydj14x	-0.004644811856673092	0.9756987609266713	0.1524799038965105	-0.030461796853082805	0.9974355601336777
PDR10	apj1d	0.14768080934119848	0.767450431189634	0.49940844558203773	0.295711477544364	NA
PDR10	sis14xcga	1.3237989175646263	0.013315851167765682	0.5348232518376024	2.4752082356482776	0.7972232508650235
PDR10	ydj14xcga	0.8887496234755932	0.06804245464737126	0.48705933903895426	1.8247255564983886	NA
PDR10	apj1dsis14x	0.2390900354261408	0.640876398724725	0.5125476214444864	0.46647379760016394	NA
PDR10	apj1dydj14x	0.7250961837591011	0.13737228658377035	0.48806732697605054	1.4856478679931828	0.5939810623000581
POM33	apj1d	-0.017261810041553503	0.9595874219509686	0.3406622590839945	-0.05067133085998056	0.9997008385809374
POM33	sis14xcga	-0.3739875438367089	0.3307836900886718	0.38454857377859847	-0.9725365515255557	0.9792828732932796
POM33	ydj14xcga	-0.2604922209816725	0.4452317929745542	0.341231566162608	-0.763388404862695	0.8274857991362001
POM33	apj1dsis14x	-0.021627459941932527	0.9495567769090654	0.341863814352179	-0.06326337867292528	0.9995467300026422
POM33	apj1dydj14x	0.1379485211576516	0.684679750254185	0.3397031110032479	0.4060855396650538	0.9473748492337762
FAP1	apj1d	-0.03514084838931393	0.7898998513298846	0.13188995951855736	-0.26644066400194394	0.9997008385809374
FAP1	sis14xcga	-0.08037935708305625	0.6021154775541135	0.15417223997843835	-0.5213607656884123	0.9838668840705705
FAP1	ydj14xcga	0.15206810525106595	0.24682869084591785	0.13130978548064937	1.1580866170364406	0.66678205563365
FAP1	apj1dsis14x	-0.06497623742975417	0.6368707175785189	0.13763861227266344	-0.47207855671369026	0.9995467300026422
FAP1	apj1dydj14x	-0.1963942232236865	0.1412075926993525	0.1334826567353876	-1.4713089177795815	0.6043575495551164
MSO1	apj1d	-0.12565414084740792	0.6269602957940079	0.258542460110698	-0.48600968983434145	0.9997008385809374
MSO1	sis14xcga	-0.13582382799385115	0.6468542188909281	0.2964700752309345	-0.4581367205039213	0.9838668840705705
MSO1	ydj14xcga	0.36029805135324755	0.15801415074428457	0.25520798769761716	1.411782031603753	NA
MSO1	apj1dsis14x	0.08220919773669504	0.7541869231578667	0.2625456982121165	0.3131233849822076	0.9995467300026422
MSO1	apj1dydj14x	0.16630593669834365	0.515825688471856	0.25593663919150766	0.6497933911443732	0.8977454628188618
IPT1	apj1d	-0.34814543170391954	0.2515384137795228	0.30362737127629813	-1.1466207089317728	0.9997008385809374
IPT1	sis14xcga	-0.48463262119231076	0.15587410724776674	0.34151052950583183	-1.4190854434080777	0.9792828732932796
IPT1	ydj14xcga	-0.619211169727294	0.04181086768135776	0.30422121185530937	-2.035397748733566	0.26708911420388576
IPT1	apj1dsis14x	-0.45432894541507823	0.13637971906749405	0.3050397623889985	-1.489408927730872	0.9995467300026422
IPT1	apj1dydj14x	-0.4374880225947072	0.14943412726678446	0.3034880130744515	-1.4415331207410254	0.6130473450124373
EFT1	apj1d	0.018864403742150943	0.9157049490755831	0.17822587389966713	0.10584548320279649	0.9997008385809374
EFT1	sis14xcga	-0.17778245507957896	0.37232430550810985	0.1992790793961165	-0.8921280428348042	0.9792828732932796
EFT1	ydj14xcga	-0.3139489312727912	0.07816721712005376	0.1782361953697257	-1.7614207407286084	0.3854019704051284
EFT1	apj1dsis14x	0.10005254107358413	0.5745597179361714	0.17823592886505443	0.5613488913861788	0.9995467300026422
EFT1	apj1dydj14x	-0.3259721170596045	0.06741352096847052	0.17823327962084173	-1.8289071364957754	0.42860379536219145
NDD1	apj1d	0.07827738319991501	0.7181971042846607	0.21691334969586182	0.360869367006084	0.9997008385809374
NDD1	sis14xcga	0.13115015279303677	0.594474882314566	0.24635493270303885	0.5323626012032313	0.9838668840705705
NDD1	ydj14xcga	-0.03655545086135794	0.8673489204923184	0.21885972417724764	-0.16702685246808052	0.9815368402799278
NDD1	apj1dsis14x	-0.03226743248386435	0.8849975656890262	0.22309267999628254	-0.1446368947847237	0.9995467300026422
NDD1	apj1dydj14x	0.2813629225714343	0.19206615556690798	0.21568786438019874	1.304491207143061	0.6747725174466078
IPL1	apj1d	-0.21300363205857353	0.39525698990747093	0.25055640210575925	-0.8501224884633569	0.9997008385809374
IPL1	sis14xcga	0.24538655674903861	0.38359027408988405	0.2816326259779977	0.8713001765932091	0.9792828732932796
IPL1	ydj14xcga	0.01871234851807605	0.9398856415406536	0.24812963943386404	0.0754135965407857	NA
IPL1	apj1dsis14x	-0.08993650076350881	0.7305571059983411	0.2611513804190602	-0.3443845505208165	NA
IPL1	apj1dydj14x	0.10892972737419798	0.6568466174578873	0.24518753451251618	0.44427106618928625	0.93979732446328
YJR124C	apj1d	0.006865121824411683	0.9845071108722622	0.3535318967390448	0.01941867731804434	0.9997008385809374
YJR124C	sis14xcga	-0.42095599278549767	0.29443085851552764	0.40150277461987516	-1.0484510180136113	0.9792828732932796
YJR124C	ydj14xcga	-0.16253860673088386	0.6460177656682984	0.3538822614588397	-0.4593013678075775	0.9221855323973673
YJR124C	apj1dsis14x	-0.3352933266372984	0.34848844603379725	0.357636585963043	-0.9375252415365203	0.9995467300026422
YJR124C	apj1dydj14x	0.022365492279594328	0.9494427278698735	0.3527312699876959	0.06340660492157242	0.9958293089450293
KEI1	apj1d	-0.03972986849752155	0.8747888843595388	0.25212734382611013	-0.1575785787237852	0.9997008385809374
KEI1	sis14xcga	-0.33741398787252225	0.2473524314484719	0.2916777402234537	-1.1568040386422018	0.9792828732932796
KEI1	ydj14xcga	-0.32979061927606623	0.19603950011593843	0.25507470498145424	-1.292917772070125	NA
KEI1	apj1dsis14x	-0.5268759399908951	0.04524594811793485	0.26312738282458853	-2.0023607362147184	0.9995467300026422
KEI1	apj1dydj14x	-0.37177450595018025	0.14457270222340943	0.2548194222273307	-1.4589724075997275	0.6087687623099507
PSK1	apj1d	0.06254564692590653	0.6560726291102734	0.14044408269547204	0.445341987540519	0.9997008385809374
PSK1	sis14xcga	0.2970677485464922	0.06017763839504078	0.15805764996742896	1.8794898482149338	0.9792828732932796
PSK1	ydj14xcga	-0.15564326438543152	0.27413811914237796	0.14232420650433258	-1.0935825198554223	0.697250604336763
PSK1	apj1dsis14x	0.2591569504496567	0.06893528514868308	0.14248445647096766	1.8188436610449645	0.9995467300026422
PSK1	apj1dydj14x	0.20262313434073037	0.14728261989444558	0.13981753810855665	1.4491968395510613	0.6101835639403773
PMA2	apj1d	-0.0047483488422620694	0.9922449302940041	0.48852875879369073	-0.009719691536660038	0.9997008385809374
PMA2	sis14xcga	-0.5075221736105381	0.3533019059503009	0.5467788627764432	-0.9282037184711809	0.9792828732932796
PMA2	ydj14xcga	-0.19027791383043516	0.6968902471429335	0.4884911531488587	-0.38952171928577684	0.93128871290259
PMA2	apj1dsis14x	-0.0062199319822114985	0.9898427777995167	0.48858374394956194	-0.012730534036870456	0.9995467300026422
PMA2	apj1dydj14x	-0.025303514588412315	0.9586824640653576	0.4884186719700039	-0.05180701730003951	0.9958293089450293
SUP35	apj1d	0.03316721362827829	0.7243477074627027	0.09405024718857397	0.35265418879523935	0.9997008385809374
SUP35	sis14xcga	-0.19173557272518027	0.06999830868884709	0.10581891120639819	-1.8119216172164436	0.9792828732932796
SUP35	ydj14xcga	-0.006220010574990145	0.9473413891759992	0.09417728002673793	-0.06604576574333233	0.9942220709878937
SUP35	apj1dsis14x	-0.027453635220049837	0.7715888215056261	0.09457076367496237	-0.29029727743774364	0.9995467300026422
SUP35	apj1dydj14x	-0.005552706192023605	0.9529363644045608	0.09408214484349796	-0.05901976619751089	0.9958293089450293
OSH2	apj1d	0.033430274991268764	0.7694050417077883	0.114036869158374	0.29315321648160053	0.9997008385809374
OSH2	sis14xcga	0.12686550353473164	0.3261399956295033	0.129201662001039	0.981918510720949	0.9792828732932796
OSH2	ydj14xcga	0.024604874418216013	0.8297617207507417	0.11443745475963842	0.21500717985991108	0.9771957909368024
OSH2	apj1dsis14x	0.03645708949552669	0.7543710570996736	0.11652061655896397	0.31288102116313454	0.9995467300026422
OSH2	apj1dydj14x	0.05738033693690751	0.6144899841787914	0.11392340334475792	0.5036747082007519	0.9325847919216662
OCA6	apj1d	0.08317477508433474	0.69032040711184806	0.20876139605977545	0.3984202858105001	0.9997008385809374
OCA6	sis14xcga	0.2051826599714928	0.39533016056432396	0.24139395665662736	0.8499908730662897	0.9792828732932796
OCA6	ydj14xcga	-0.08712402887335759	0.6828625780280949	0.21324658635291216	-0.4085600166615178	NA
OCA6	apj1dsis14x	0.19393823086053216	0.3710078783306842	0.2167907878995779	0.8945870474458005	0.9995467300026422
OCA6	apj1dydj14x	0.36545916082297836	0.07487750923689333	0.2051742102165421	1.7812139276045977	0.4518119786902013
MSB3	apj1d	-0.03659831845650932	0.839826728795015	0.1810765998110326	-0.20211511865532314	0.9997008385809374
MSB3	sis14xcga	0.0842309025007616	0.6867918000415533	0.20889945811403499	0.40321264239364973	0.9844907973740804
MSB3	ydj14xcga	0.3199887303895765	0.0728089593327785	0.17836344829476572	1.7940263739505586	NA
MSB3	apj1dsis14x	0.1270360048273872	0.49586113153537636	0.1865388413575264	0.6810163711905225	0.9995467300026422
MSB3	apj1dydj14x	0.21958363406292777	0.21868530293491958	0.17851870545832324	1.2300315168608003	0.7036111529128647
GON7	apj1d	-0.03895178583932713	0.7830438793501089	0.14146049028183966	-0.27535452310197217	0.9997008385809374
GON7	sis14xcga	-0.17943567966510512	0.28259083664699286	0.16699187422661282	-1.0745174308398127	0.9792828732932796
GON7	ydj14xcga	-0.058500800019434036	0.6816799740748194	0.14262513757697748	-0.41017173419278946	0.9256258528661475
GON7	apj1dsis14x	-0.07465809616481428	0.6131575357156076	0.14767071549826694	-0.5055714392180247	0.9995467300026422
GON7	apj1dydj14x	-0.2722517457150982	0.058444268279543306	0.1438696029667263	-1.89235071273578	0.40262454792578334
UMP1	apj1d	-0.023814946762081464	0.9069830112985763	0.20381684906927686	-0.11684483824978975	0.9997008385809374
UMP1	sis14xcga	-0.051317729480951535	0.8230231324395088	0.22944693231200533	-0.22365838132526838	0.9907292550326111
UMP1	ydj14xcga	0.08787673736127592	0.6664907224000192	0.2039048850939952	0.4309692596171341	0.9248165943166299
UMP1	apj1dsis14x	-0.05537722319538043	0.7877265499663519	0.20566146110204425	-0.26926397828080967	0.9995467300026422
UMP1	apj1dydj14x	0.09042700992833687	0.6569128877706807	0.20358218057948868	0.44417939561773007	0.93979732446328
CHL1	apj1d	0.39575840490406666	0.3730177436507379	0.4442556083179447	0.890834910115148	0.9997008385809374
CHL1	sis14xcga	0.5640799648813192	0.25690607887380795	0.49754165318472876	1.1337341532526641	0.9792828732932796
CHL1	ydj14xcga	0.9731948351767257	0.028068268791605185	0.44310028268980645	2.196330883088182	NA
CHL1	apj1dsis14x	-0.06744176990142926	0.8811383516971533	0.4510361465528755	-0.1495263082945016	0.9995467300026422
CHL1	apj1dydj14x	0.35659559453043765	0.4226769067601248	0.44475172750808567	0.8017857435392529	0.8660942520883554
RMR1	apj1d	0.004453151934620759	0.9893157100381974	0.33254385632440947	0.013391171870805924	0.9997008385809374
RMR1	sis14xcga	0.3598894609013366	0.33466527012066727	0.37303540352912545	0.964759530855729	0.9792828732932796
RMR1	ydj14xcga	0.1935224836627983	0.5589704513057898	0.3311634985601661	0.5843714192663023	NA
RMR1	apj1dsis14x	-0.030997757792821705	0.9283111769743709	0.34453496529109123	-0.08996984606956299	NA
RMR1	apj1dydj14x	0.5230526073958373	0.10780540077630382	0.32525396740617357	1.6081359792996928	0.530680130500518
CST26	apj1d	-0.022187582006778495	0.9471923568312763	0.3349930656556806	-0.06623295907140893	0.9997008385809374
CST26	sis14xcga	-0.5281429354135099	0.1677899559098434	0.3828954020357218	-1.3793399779823874	0.9792828732932796
CST26	ydj14xcga	-0.0867365346434215	0.7957822001465302	0.3351365491266863	-0.2588095356040498	NA
CST26	apj1dsis14x	-0.145502995389063	0.6670895033293625	0.3382642748474413	-0.43014591314641637	0.9995467300026422
CST26	apj1dydj14x	-0.08587897334947872	0.797544234065597	0.3347760786420342	-0.2565266123488664	0.9694495315065704
YBR085C-A	apj1d	0.09106542568711574	0.7695342201808254	0.3108202498890959	0.2929842110338979	0.9997008385809374
YBR085C-A	sis14xcga	0.0589950453515285	0.8660431746361552	0.34973170443672896	0.16868658060768257	0.9907292550326111
YBR085C-A	ydj14xcga	0.3850059524371788	0.21465145439491545	0.3102694094856365	1.2408762857912425	0.6246358054519604
YBR085C-A	apj1dsis14x	0.06459726638043052	0.8367892565874303	0.31357573842507597	0.20600211835541934	0.9995467300026422
YBR085C-A	apj1dydj14x	0.8927578581957649	0.0038038990139683602	0.3084876966686853	2.8939820545082666	0.08363822956962932
TGL5	apj1d	0.21895041509929583	0.2198720174182056	0.17846282143871625	1.2268685059116524	0.9997008385809374
TGL5	sis14xcga	0.1331540409888444	0.5145955547489758	0.20431840493706363	0.6516987103039491	0.9816226614664663
TGL5	ydj14xcga	-0.5428050908156644	0.003505280175129231	0.1859202890973306	-2.919558125963875	0.05917842907909502
TGL5	apj1dsis14x	0.08586093585101538	0.6408327448959339	0.18403972447509254	0.4665347989185649	0.9995467300026422
TGL5	apj1dydj14x	-0.08756552023345344	0.6280948261438826	0.18076731610078492	-0.48441013631375823	0.9378767395476141
YMC2	apj1d	0.038314662197927375	0.8222938375507195	0.17059395244236655	0.2245956650243601	0.9997008385809374
YMC2	sis14xcga	-0.09067780536350348	0.6407129778935743	0.19429480176825797	-0.4667021687572372	0.9838668840705705
YMC2	ydj14xcga	0.22745208487058263	0.1814684901212717	0.17021707203455289	1.3362471939619043	0.5916395638724146
YMC2	apj1dsis14x	-0.07666350041016144	0.6596360458795071	0.17407076540676195	-0.4404157138679611	0.9995467300026422
YMC2	apj1dydj14x	-0.3918462699666984	0.023304005572349976	0.17274021742254428	-2.268413666564939	0.24567999871832552
NEL1	apj1d	-0.3112677378223312	0.38798144282654334	0.3605624637141886	-0.8632838111209146	NA
NEL1	sis14xcga	0.19964157983785338	0.6202221964626822	0.4028805104856389	0.4955354618599001	0.9838668840705705
NEL1	ydj14xcga	-0.545891092204187	0.1402252951583044	0.37010755666310285	-1.4749525708849396	NA
NEL1	apj1dsis14x	-0.5611085987521497	0.14733867040911444	0.38723954946386147	-1.448996104682521	NA
NEL1	apj1dydj14x	-0.10966014969136396	0.7583161353994758	0.3563949718459232	-0.3076927520143923	0.9656453297545932
FDC1	apj1d	0.04183988967254599	0.8641855145262807	0.24460813012909102	0.17104864687230611	0.9997008385809374
FDC1	sis14xcga	0.21924891089389034	0.42387604436490517	0.27415886932753614	0.799714820212345	0.9792828732932796
FDC1	ydj14xcga	0.12346259850509296	0.6139346397518285	0.2447396637465954	0.5044650164794159	0.9088020730791955
FDC1	apj1dsis14x	0.16757177783073585	0.49616978979122445	0.24623765474261225	0.6805286462214546	0.9995467300026422
FDC1	apj1dydj14x	3.438247926659696e-4	0.9988791531538345	0.24475458391171728	0.001404773660092049	0.9998247822806936
YPT52	apj1d	-0.06354990778570746	0.6257081024980693	0.1302848691371738	-0.48777657917280703	0.9997008385809374
YPT52	sis14xcga	0.036382147972931315	0.8042994141217178	0.1468284695380558	0.2477867411367493	0.9893462618197525
YPT52	ydj14xcga	0.07867592068779648	0.5457504275211944	0.13022791611730955	0.6041402107434866	0.8883426056490521
YPT52	apj1dsis14x	-0.08191507410003815	0.5355058487912296	0.13220141860271575	-0.6196232609742616	0.9995467300026422
YPT52	apj1dydj14x	-0.012947073042887924	0.9207664072842543	0.1301627257963427	-0.09946836134290382	0.9895894768307555
MGR1	apj1d	-0.2431884206719923	0.1375263071461959	0.16375595386556313	-1.4850661300024544	0.9997008385809374
MGR1	sis14xcga	-0.2762552902541207	0.14827693278745824	0.19109489671070348	-1.445644520127299	0.9792828732932796
MGR1	ydj14xcga	0.1009111392357663	0.5323457463288721	0.16160541095416228	0.6244292108782714	0.8847474006038362
MGR1	apj1dsis14x	-0.15602780004697506	0.35541641440227467	0.16883672177788145	-0.9241342665503919	0.9995467300026422
MGR1	apj1dydj14x	0.024208926381168103	0.8808814319301124	0.16155230838056542	0.1498519372693805	0.9822746599830349
GPI10	apj1d	0.03348562756054738	0.9241982846774923	0.3519367306148315	0.0951467256686967	0.9997008385809374
GPI10	sis14xcga	-0.36713270273368126	0.35934640720262384	0.40053263377165166	-0.9166112116172485	0.9792828732932796
GPI10	ydj14xcga	0.13679402603043872	0.6968187212029289	0.3510974203633156	0.38961843094399345	NA
GPI10	apj1dsis14x	-0.1375939014151461	0.6988708636397944	0.3556821331940699	-0.386845131014976	0.9995467300026422
GPI10	apj1dydj14x	0.04216928217880916	0.9044476792597238	0.35127961431411686	0.12004477476196802	0.9859577703565844
DOT5	apj1d	-0.13091056881572263	0.45168534815252304	0.17394250700302893	-0.7526082673595307	0.9997008385809374
DOT5	sis14xcga	0.09209387782166775	0.6382526958027404	0.1958847293113058	0.4701432222177434	0.9838668840705705
DOT5	ydj14xcga	0.12949790679879167	0.4546738267798384	0.17320756094957132	0.7476458076590228	0.8324400100703183
DOT5	apj1dsis14x	-0.016082818546263627	0.9274515869480484	0.1766341038832586	-0.09105160437699573	0.9995467300026422
DOT5	apj1dydj14x	0.08848496337045801	0.6087738132725143	0.17288143941816672	0.5118245409585584	0.929542654120098
APL4	apj1d	0.01144054256465815	0.9112130048605556	0.10259780142962326	0.11150865228340946	0.9997008385809374
APL4	sis14xcga	0.0068663775521538	0.9535795407426937	0.1179541115378722	0.05821227817013545	0.9994389642405372
APL4	ydj14xcga	-0.035932147249584726	0.7280952966100027	0.10335417859588597	-0.3476603243114063	0.9437004843253032
APL4	apj1dsis14x	0.08052857870972864	0.44426587668661893	0.10526480621055032	0.7650095184581981	0.9995467300026422
APL4	apj1dydj14x	0.06930288086220167	0.49850446970557943	0.10239110536875236	0.6768447377593354	0.8889997397593146
YBR121C-A	apj1d	-0.02639542766824965	0.7891978948488965	0.09872899604323784	-0.267352335444492	0.9997008385809374
YBR121C-A	sis14xcga	0.07994427679485563	0.4786448188202191	0.11283852601063461	0.7084838806501352	0.9792828732932796
YBR121C-A	ydj14xcga	0.07512291587158959	0.4470075131455327	0.09879220355801029	0.7604134047630368	0.8274857991362001
YBR121C-A	apj1dsis14x	-0.004928838474690938	0.9613969914905887	0.10183427060362661	-0.04840058700744902	0.9995467300026422
YBR121C-A	apj1dydj14x	-0.1228060089579359	0.2162675257156792	0.09931630247952682	-1.2365141058614348	0.7023655935943318
YPR071W	apj1d	-0.01926065475897616	0.9498001737678191	0.3059300022323644	-0.06295771783882453	0.9997008385809374
YPR071W	sis14xcga	-0.15746157422312937	0.6651864389770688	0.36385115032192666	-0.43276371143477543	0.9838668840705705
YPR071W	ydj14xcga	0.11952306909061372	0.6953792892911497	0.30524413297219566	0.3915654919451013	NA
YPR071W	apj1dsis14x	-0.07407167370178472	0.8178847466769793	0.32167812960015085	-0.23026642748096227	NA
YPR071W	apj1dydj14x	0.03283381018975208	0.9144057424627857	0.30547885443344874	0.10748308667926217	0.9873491525658142
YFR006W	apj1d	-0.35754979761688754	0.2545679699179835	0.3138262193411992	-1.1393241723635303	0.9997008385809374
YFR006W	sis14xcga	-0.42074669349088306	0.23184198250302115	0.3519045173351239	-1.1956274295001441	0.9792828732932796
YFR006W	ydj14xcga	-0.41942513295947964	0.1818523544086122	0.3141588782621471	-1.3350733083834545	0.5920450453897451
YFR006W	apj1dsis14x	-0.29594521939697144	0.34690152422215254	0.31462905593978874	-0.9406163029444017	0.9995467300026422
YFR006W	apj1dydj14x	-0.04022883579908996	0.8979062949463396	0.31353661513322384	-0.12830665975645764	0.9859577703565844
APE4	apj1d	0.13017060702650232	0.46603766372439254	0.17857492003722733	0.7289411469391435	0.9997008385809374
APE4	sis14xcga	0.18177698408285275	0.36563876319932664	0.20093119541725438	0.9046727846583209	0.9792828732932796
APE4	ydj14xcga	0.144974053715737	0.41791634160270563	0.17897115028507582	0.8100414702862095	0.8114229107131845
APE4	apj1dsis14x	0.2038539848855248	0.2582047077290747	0.18029890643599306	1.1306445996548178	0.9995467300026422
APE4	apj1dydj14x	0.17594141934805613	0.32428391660511	0.17849519780731754	0.9856927329663056	0.8071259288381687
BSC1	apj1d	-1.6119795744576757	0.279734973284035	1.4913103568207406	-1.0809148927887717	NA
BSC1	sis14xcga	0.35515806649082166	0.8110221001783426	1.4853479080983991	0.23910766262532324	0.9905705732056362
BSC1	ydj14xcga	0.5074630145248984	0.6970461262309009	1.303490167463096	0.38931096466384774	NA
BSC1	apj1dsis14x	-1.4751313925452838	0.3482769904141903	1.572741041714657	-0.9379366045773462	NA
BSC1	apj1dydj14x	-0.19304561984722024	0.8853481404498397	1.338801065597201	-0.1441929087209892	NA
YLR446W	apj1d	-0.26206405853340736	0.44077504680256996	0.33995217013520984	-0.7708850878321386	NA
YLR446W	sis14xcga	0.31081793879262204	0.41067538830090966	0.37779967839132605	0.8227056733242527	0.9792828732932796
YLR446W	ydj14xcga	-0.23521948003099266	0.49178190820222245	0.34214864957520724	-0.6874774467852733	NA
YLR446W	apj1dsis14x	0.10391359248925863	0.7640080878890176	0.346122908231152	0.30022165542380624	NA
YLR446W	apj1dydj14x	0.07311140457466124	0.8257295440708768	0.3320501212127858	0.2201818337172347	0.973082244323618
YMR119W-A	apj1d	-0.252174709067188	0.6414497714587363	0.5415277517815746	-0.46567273466144116	NA
YMR119W-A	sis14xcga	-0.772969652341601	0.24785174509461816	0.6689001309376215	-1.1555830483365304	0.9792828732932796
YMR119W-A	ydj14xcga	-0.36596581467594597	0.5047385988607356	0.5486312009816213	-0.6670525008806517	NA
YMR119W-A	apj1dsis14x	0.16544367921403758	0.7616452906352247	0.5454410102664676	0.30332093865331533	NA
YMR119W-A	apj1dydj14x	-0.13433142763508346	0.803069258918861	0.5386683068603945	-0.24937689098144372	0.9694495315065704
YPT31	apj1d	-0.007157870908138128	0.952299783425796	0.11965879554004026	-0.05981901184809235	0.9997008385809374
YPT31	sis14xcga	-0.01568291659798911	0.9077510654830063	0.1353425995945317	-0.11587568618434275	0.9968228537734142
YPT31	ydj14xcga	0.1798260064664385	0.1325878197558374	0.11956715624046291	1.5039749386092978	0.5131381234761005
YPT31	apj1dsis14x	0.03018233222522055	0.8034176772573649	0.12125000207016297	0.24892644709197723	0.9995467300026422
YPT31	apj1dydj14x	0.06178130719616074	0.60530359154939	0.11954846133552174	0.5167888110476542	0.9271152367020118
EPO1	apj1d	0.11227085033385495	0.39515993204571975	0.1320372034434564	0.850297093591003	0.9997008385809374
EPO1	sis14xcga	0.2528777834958683	0.095842969211306	0.15184663837343004	1.6653498964789502	0.9792828732932796
EPO1	ydj14xcga	0.3269677718623488	0.012629409916181398	0.13109902811658833	2.49405183668922	0.13298468272642666
EPO1	apj1dsis14x	0.13647567600878996	0.3221344334972659	0.1378429128208249	0.99008119616703	0.9995467300026422
EPO1	apj1dydj14x	0.2911594539075562	0.025952306549723927	0.13074508245186628	2.2269247029978843	0.2621818155721092
DXO1	apj1d	0.07318446193027962	0.7260494008240899	0.20886840422546527	0.3503855080507048	0.9997008385809374
DXO1	sis14xcga	0.027948678519170395	0.9092124422788166	0.24509509068016552	0.11403198016577881	0.9968228537734142
DXO1	ydj14xcga	0.007745393773747772	0.9707724744146098	0.21139482578904717	0.03663946714323543	NA
DXO1	apj1dsis14x	-0.2545872152945971	0.25870702760529973	0.22540764831582819	-1.1294524262898311	0.9995467300026422
DXO1	apj1dydj14x	0.1634110473601615	0.43207861028508543	0.20799744626348707	0.7856396811389482	0.86875895576091
HBT1	apj1d	-0.18033695670075314	0.7614742839262194	0.5941021667273666	-0.30354536105152724	0.9997008385809374
HBT1	sis14xcga	0.5065767306583331	0.4424407625875419	0.6595380127243543	0.7680781408880681	0.9792828732932796
HBT1	ydj14xcga	0.33761822792748114	0.5673413657642274	0.5902711939002714	0.5719713775910994	NA
HBT1	apj1dsis14x	-0.07844303863549965	0.8962179454746774	0.6013703834019908	-0.1304404752886937	NA
HBT1	apj1dydj14x	1.2274670892422148	0.03525137475572322	0.5829926411811613	2.105458975872025	0.31330561823366343
THI7	apj1d	0.36353787856970865	0.2778843203146758	0.33503192206811216	1.0850842998053218	0.9997008385809374
THI7	sis14xcga	-0.5842450617331367	0.13422569111231566	0.39010936213887587	-1.4976442978191076	0.9792828732932796
THI7	ydj14xcga	-0.3817110417512941	0.260319671758482	0.3391070295586878	-1.1256358862511666	NA
THI7	apj1dsis14x	0.10150294663509758	0.764137856332965	0.33828505857126623	0.30005152182538397	0.9995467300026422
THI7	apj1dydj14x	-0.5659218289740243	0.09688117058615893	0.3408827865658506	-1.6601654623728015	0.5097187304731476
DBF20	apj1d	0.06891759704710718	0.710581009780845	0.18572372749453453	0.3710758877006455	0.9997008385809374
DBF20	sis14xcga	0.09323915914414742	0.6648842354850109	0.2152436094056786	0.4331796860385094	0.9838668840705705
DBF20	ydj14xcga	-0.3519597711508333	0.0677445166265338	0.19267493029094376	-1.8267024704218946	NA
DBF20	apj1dsis14x	0.11472927053181976	0.5514168667049332	0.192615661779402	0.5956383269768394	0.9995467300026422
DBF20	apj1dydj14x	0.006954295463442488	0.9702925328116997	0.18673563133075258	0.0372413953024573	0.9962634954535305
DMA1	apj1d	-0.016337819927509142	0.9045123690849028	0.13619036409563073	-0.11996311219226187	0.9997008385809374
DMA1	sis14xcga	0.050839009433517816	0.7463377155968288	0.15716658614877682	0.32347212393728947	0.9872814001744901
DMA1	ydj14xcga	-0.16217634738240067	0.24133642478798342	0.13841671204495098	-1.1716529383369092	0.6627238420111512
DMA1	apj1dsis14x	-0.158083767123431	0.2699097026098414	0.14328649550571176	-1.1032705250100097	0.9995467300026422
DMA1	apj1dydj14x	0.12007922392869597	0.37492197505150243	0.13533232597550282	0.8872915104587215	0.8431061884578747
APM4	apj1d	-0.0284230551796876	0.8594808870746014	0.16055047306680198	-0.17703501358019239	0.9997008385809374
APM4	sis14xcga	0.07506871541004993	0.6800346716813215	0.18202191154674596	0.4124158172614903	0.9838668840705705
APM4	ydj14xcga	-0.1214769051126831	0.45259129963439904	0.1617315790516584	-0.7511019543924837	0.8320136724945703
APM4	apj1dsis14x	-0.042457595082400545	0.7961212417319803	0.1643285534144556	-0.25837016270275065	0.9995467300026422
APM4	apj1dydj14x	-0.12363822495086199	0.4429163067875371	0.1611387808252682	-0.7672778974598911	0.8726697405293873
ISU1	apj1d	-0.10280580129428793	0.6633569781117656	0.23618148819292836	-0.43528306168648356	0.9997008385809374
ISU1	sis14xcga	0.2289457710709627	0.3858817844015828	0.26403315787294684	0.8671099225390917	0.9792828732932796
ISU1	ydj14xcga	-0.38370474300469354	0.10550063886700053	0.23703738980327535	-1.6187519754716417	0.4541229859082379
ISU1	apj1dsis14x	-0.1583009147066937	0.5051148533129359	0.23752373905060653	-0.6664635515566985	0.9995467300026422
ISU1	apj1dydj14x	-0.37924870201621225	0.10916469584274795	0.2367405926252543	-1.6019589112735706	0.5340980611433775
SSN2	apj1d	0.04502264166938056	0.7655373128276178	0.150972597859052	0.29821730769588856	0.9997008385809374
SSN2	sis14xcga	0.15762582343024517	0.36386140189691635	0.1735906354955904	0.9080318358201369	0.9792828732932796
SSN2	ydj14xcga	-0.3392433290502491	0.029911782539164388	0.15624285596424436	-2.1712565797432926	0.22597737082670083
SSN2	apj1dsis14x	0.017642370093392656	0.9108706208121772	0.15760495445148326	0.1119404536157754	0.9995467300026422
SSN2	apj1dydj14x	-0.07661465816528254	0.6151869583669317	0.1524113877812906	-0.5026832921121622	0.9325847919216662
RSM24	apj1d	-0.199810908565004	0.25086897769859584	0.1740147426182303	-1.1482412671400362	0.9997008385809374
RSM24	sis14xcga	-0.11131440777996056	0.5733896770793722	0.1976932201898194	-0.5630663897986973	0.9838668840705705
RSM24	ydj14xcga	-0.18426849239079243	0.29100746296185	0.17451087440565147	-1.0559140971493808	0.7186146977169863
RSM24	apj1dsis14x	-0.041747911163435285	0.8131000556893656	0.17657719840360475	-0.23642866429453452	0.9995467300026422
RSM24	apj1dydj14x	-0.17281202814586907	0.32018994794166905	0.17384333280207923	-0.9940676203131454	0.8056873766937099
ADE3	apj1d	0.07101493437182332	0.7002783074506072	0.18448082159938345	0.3849448075748415	0.9997008385809374
ADE3	sis14xcga	0.0802061025658498	0.697540118549654	0.2063746549570815	0.3886431818991038	0.9854540024253493
ADE3	ydj14xcga	0.3264261151031793	0.07677331866681605	0.18445041380753666	1.769722866785141	0.3824479787480742
ADE3	apj1dsis14x	0.038158352293215264	0.8363049279416194	0.18467693145409478	0.20662219148199515	0.9995467300026422
ADE3	apj1dydj14x	-0.18360340663795752	0.31982244897744694	0.18455890264993172	-0.9948228126725126	0.8055861877107339
PET117	apj1d	-0.20293172950448204	0.5537419668163829	0.34269617904849436	-0.5921622180554441	0.9997008385809374
PET117	sis14xcga	0.5252751010799247	0.16346415337716122	0.37694258930934094	1.393514864007191	0.9792828732932796
PET117	ydj14xcga	0.022100616107653348	0.9483083978832154	0.340894744109641	0.06483120226853716	NA
PET117	apj1dsis14x	0.06568742023638298	0.8499861873859453	0.3473024849722982	0.18913605021174087	NA
PET117	apj1dydj14x	-0.16047276353367887	0.6391108007752201	0.34220143017889326	-0.46894241046797563	0.9397423432890535
YOR342C	apj1d	-0.25141371763453546	0.09029327630744131	0.14842714312413857	-1.6938527033715323	0.9997008385809374
YOR342C	sis14xcga	-0.31100483279532964	0.0738047211831288	0.17395737550140464	-1.7878220564026526	0.9792828732932796
YOR342C	ydj14xcga	-0.4385330422001347	0.003752696640027038	0.151310397372042	-2.8982346872163034	0.06271552112045187
YOR342C	apj1dsis14x	-0.4981296209288205	0.0015739879199252278	0.1576018085621423	-3.1606846740747163	0.26711157959619974
YOR342C	apj1dydj14x	-0.23219811345353028	0.11789879646852729	0.14849709856677357	-1.5636542107192721	0.5538448948606937
FIT3	apj1d	-0.6661861296540903	0.47190113351137	0.9260440744130795	-0.7193892256978315	0.9997008385809374
FIT3	sis14xcga	-0.3197140131163234	0.7574743624937852	1.0353463625472197	-0.30879908857722194	0.9872814001744901
FIT3	ydj14xcga	-2.3305820255384724	0.011852350057777412	0.9261166957755936	-2.5165101073862868	0.1269237098420241
FIT3	apj1dsis14x	-0.07991927352483597	0.9312251959091707	0.926026403464205	-0.08630345012395232	0.9995467300026422
FIT3	apj1dydj14x	-2.5802363211648567	0.005336288229409136	0.9261437116639339	-2.7859999357217866	0.10239851995124366
NOC3	apj1d	0.1408623448489356	0.3034516205189968	0.1368845212837844	1.029059703229005	0.9997008385809374
NOC3	sis14xcga	-0.0018437885020085056	0.9905071070317184	0.15496810889603152	-0.011897857663382262	0.9994389642405372
NOC3	ydj14xcga	0.1308232321097402	0.34069794303803236	0.137305836508391	0.952787116968224	0.7665144140038853
NOC3	apj1dsis14x	0.1045800959192232	0.4506490069381308	0.1386390760547858	0.7543334743366037	0.9995467300026422
NOC3	apj1dydj14x	-0.040358787645720345	0.7689654593180386	0.13740172600687134	-0.2937283891448499	0.9665870595653628
YJR087W	apj1d	-0.6238879372191081	0.5531416238184073	1.0519828008642853	-0.5930590658958833	NA
YJR087W	sis14xcga	-0.6662017487357331	0.6016075320389885	1.2760280760115499	-0.5220901963364818	0.9838668840705705
YJR087W	ydj14xcga	-0.6221099336028122	0.5576256671795734	1.0609478434467945	-0.5863718348130187	NA
YJR087W	apj1dsis14x	-0.5392588251676323	0.6256805615611363	1.1054566165543518	-0.4878154575151694	NA
YJR087W	apj1dydj14x	-0.492557067689461	0.6363288956487694	1.0417040598675553	-0.4728378112993875	NA
MID1	apj1d	0.0711507316854257	0.8459391967742896	0.3661857696912234	0.19430228472674319	0.9997008385809374
MID1	sis14xcga	-0.4155037853575435	0.3210748231662567	0.4187484295636917	-0.9922515668667011	0.9792828732932796
MID1	ydj14xcga	0.22970592803407724	0.5290390506016454	0.3649174962737465	0.6294735943868284	NA
MID1	apj1dsis14x	-0.25988364425418997	0.4848953967998398	0.3720858965143184	-0.6984506714411017	0.9995467300026422
MID1	apj1dydj14x	0.09220192894430582	0.8007758774819075	0.36538319961912813	0.25234309908177555	0.9694495315065704
SWC4	apj1d	-0.059386032424418936	0.677234503077798	0.14267262633192124	-0.41623984888495774	0.9997008385809374
SWC4	sis14xcga	0.0799592823978227	0.627473520710123	0.1647673551108733	0.48528594965924804	0.9838668840705705
SWC4	ydj14xcga	0.1622710664882794	0.25171571479664734	0.1415740692921371	1.1461920060617472	0.6684323661462341
SWC4	apj1dsis14x	0.034122215030834756	0.8178764148952389	0.14817890083770757	0.23027715037653704	0.9995467300026422
SWC4	apj1dydj14x	0.2072611096469734	0.1400373531511096	0.14045392655853806	1.4756519431344741	0.6020707108153673
YIL156W-A	apj1d	0.8260760507062858	0.2604085601179497	0.7340118793154178	1.12542599647942	NA
YIL156W-A	sis14xcga	0.6541430966232207	0.4398116792567936	0.8467748351944897	0.772511262067649	0.9792828732932796
YIL156W-A	ydj14xcga	0.3926594688620128	0.6037067703316688	0.7564564971597257	0.5190773961706125	NA
YIL156W-A	apj1dsis14x	1.1226611000318123	0.13134940054842878	0.7440745254528346	1.508801956831642	NA
YIL156W-A	apj1dydj14x	0.513128684305074	0.4922795848274384	0.7472519546313149	0.686687644140383	NA
RMI1	apj1d	-0.14925688173051607	0.6811501989258888	0.3632490384125057	-0.4108940862797823	NA
RMI1	sis14xcga	0.2605078946641069	0.5236047404630928	0.40844847093961023	0.6377986776760964	0.9816226614664663
RMI1	ydj14xcga	-0.11652862144082474	0.7497025376495314	0.36525728248219796	-0.3190316169712623	NA
RMI1	apj1dsis14x	-0.070003092136684	0.852786383832264	0.37724421926304125	-0.18556438657545846	NA
RMI1	apj1dydj14x	0.032895341332039515	0.9271230524952432	0.35964918575576155	0.09146507940206712	0.9923789752570787
PSY4	apj1d	0.034172991236684686	0.8260243776574552	0.1554708089742693	0.2198032637904417	0.9997008385809374
PSY4	sis14xcga	0.17239789691422688	0.3287906902422793	0.17653723431238838	0.9765526099109675	0.9792828732932796
PSY4	ydj14xcga	-0.018489069811270235	0.9060547351206916	0.15666537868907274	-0.11801630944871823	0.990764062766344
PSY4	apj1dsis14x	0.09309242417641249	0.5591698125848108	0.15938435033503967	0.5840750612009534	0.9995467300026422
PSY4	apj1dydj14x	0.21282062439853422	0.16827550709491987	0.15446788834570746	1.3777661278195905	0.6419843543751199
YHR073W-A	apj1d	0.10096787896696494	0.8211116202535561	0.4465323987923794	0.22611546046832576	NA
YHR073W-A	sis14xcga	-0.2197616811385909	0.6804954628970925	0.5336778898454716	-0.4117871197591186	0.9838668840705705
YHR073W-A	ydj14xcga	-0.011996127901393578	0.9788469755351755	0.4524366661285681	-0.02651449097625669	NA
YHR073W-A	apj1dsis14x	-0.11065996860298188	0.8143490975566964	0.4712561341823529	-0.23481915794047134	NA
YHR073W-A	apj1dydj14x	0.001820609814994138	0.9967698248038033	0.4497070302171412	0.004048435298231953	0.9996152519634907
YET1	apj1d	-0.10808779054435638	0.7723048410830162	0.3735390959196162	-0.2893613860639004	0.9997008385809374
YET1	sis14xcga	-0.2852708414469295	0.4964679886327099	0.41948040939856557	-0.6800576023465305	0.9816226614664663
YET1	ydj14xcga	-0.12597455833915935	0.735845479473774	0.3734127672088509	-0.3373600728244554	0.945597161778143
YET1	apj1dsis14x	0.04815994825389362	0.8975430957362072	0.37401242183456174	0.12876563836480379	0.9995467300026422
YET1	apj1dydj14x	-0.09973596790703795	0.7892731204425277	0.3731870604914548	-0.2672546250014521	0.9677564731844864
MRPL50	apj1d	-0.25423418771603606	0.3371148077032518	0.2648599449324075	-0.9598815999939775	0.9997008385809374
MRPL50	sis14xcga	0.030942991796960227	0.9172766506668644	0.29791609125013524	0.10386478846145972	0.9968228537734142
MRPL50	ydj14xcga	-0.2256142695784733	0.3958765621425236	0.2657385284012697	-0.849008500708606	NA
MRPL50	apj1dsis14x	-0.07800931345592056	0.771412842568005	0.2685093769813107	-0.2905273340280787	0.9995467300026422
MRPL50	apj1dydj14x	-0.43009689138674684	0.10665344627156154	0.26657478038164645	-1.6134192843411184	0.529614586416805
ATX2	apj1d	-0.023916730263334324	0.9561649516707469	0.43511266952097605	-0.05496675215103416	0.9997008385809374
ATX2	sis14xcga	-0.7292927142179477	0.14094804630702484	0.49535264171887833	-1.472269758544731	0.9792828732932796
ATX2	ydj14xcga	-0.7901044762319698	0.07177506742150844	0.43881475199824016	-1.8005421937937456	NA
ATX2	apj1dsis14x	-0.2815250269865779	0.5203765337380498	0.43799053206196686	-0.6427650973668713	0.9995467300026422
ATX2	apj1dydj14x	-0.5489434554185932	0.20903900887973106	0.436983029059183	-1.2562122986800177	0.6927656425362626
YBP1	apj1d	0.013513170571600506	0.9113498539488919	0.1213728007850709	0.11133606940100087	0.9997008385809374
YBP1	sis14xcga	0.1352021845882161	0.33309774708063555	0.13968710054762093	0.9678931272692866	0.9792828732932796
YBP1	ydj14xcga	-0.0034983489215751375	0.9771939610971421	0.12237541428472491	-0.028587024134077287	0.9968487434150731
YBP1	apj1dsis14x	0.014122595029867473	0.9111690974423984	0.12658735622918016	0.11156402543314999	0.9995467300026422
YBP1	apj1dydj14x	0.14448934776685468	0.2308431284126953	0.12058969756515885	1.198189817905315	0.7182542385812459
PPR1	apj1d	-0.468708456421243	0.1454083216385622	0.32192770700239676	-1.4559432016137506	0.9997008385809374
PPR1	sis14xcga	0.0018352138531626714	0.995934695711389	0.3601901259331336	0.005095125382485815	0.9994389642405372
PPR1	ydj14xcga	-0.10806892234160641	0.7349901953064903	0.3192629809414417	-0.33849499877164935	NA
PPR1	apj1dsis14x	-0.6733212162436337	0.04418107743806278	0.33459136536890877	-2.0123687755697257	0.9995467300026422
PPR1	apj1dydj14x	-0.17994457102943812	0.5724825185896594	0.31882502245581146	-0.5643991479821132	0.9154926072683456
MSG5	apj1d	-0.19521841437459037	0.3050084589634766	0.1903173468417036	-1.0257520799560285	0.9997008385809374
MSG5	sis14xcga	0.0483832592794971	0.8240839433155628	0.21765300685639474	0.22229538648836533	0.9907292550326111
MSG5	ydj14xcga	0.07222484814061145	0.7015044658283267	0.188433758119075	0.3832903873570846	NA
MSG5	apj1dsis14x	-0.1704669761625822	0.3909394316117	0.1986991569639457	-0.8579149442164655	0.9995467300026422
MSG5	apj1dydj14x	0.08618635876126564	0.6453424065044131	0.18726306432516412	0.460242168266623	0.93979732446328
PET54	apj1d	0.0015790280002107996	0.9948496839807383	0.24462058415574234	0.0064550087052587584	0.9997008385809374
PET54	sis14xcga	0.060873503872174974	0.8300478915400824	0.2836072611516721	0.21464014575994952	0.9907292550326111
PET54	ydj14xcga	-0.12426507408995902	0.6171381886511471	0.2485747066613566	-0.49991037205265765	NA
PET54	apj1dsis14x	0.08889901161082624	0.7257573950031427	0.2534362283635987	0.3507746788406471	0.9995467300026422
PET54	apj1dydj14x	0.11254275550677069	0.6437040206008806	0.24332190544073543	0.46252619673892087	0.9397423432890535
NOP10	apj1d	0.016649663718214473	0.913014666622698	0.15241807283136072	0.10923680774153396	0.9997008385809374
NOP10	sis14xcga	-0.13174716690447336	0.4433401043304948	0.17186688885881782	-0.7665651468951573	0.9792828732932796
NOP10	ydj14xcga	0.24366561193019404	0.10961406187090014	0.15229764846325225	1.5999302312864527	0.463775183688042
NOP10	apj1dsis14x	-0.039992723364536464	0.7947633993697112	0.15374122086073136	-0.26013012737009833	0.9995467300026422
NOP10	apj1dydj14x	0.08679683712450927	0.568834276527417	0.15233684708209835	0.5697691581980304	0.9143278943756259
YNL198C	apj1d	-0.1365989077018562	0.8291956453265791	0.6331841668509125	-0.21573329665082946	NA
YNL198C	sis14xcga	0.5779277954210708	0.4043539065967826	0.6930665214830792	0.8338705990074006	0.9792828732932796
YNL198C	ydj14xcga	0.06447543907219691	0.9183732267269585	0.6291324060454964	0.10248309966651806	NA
YNL198C	apj1dsis14x	-0.5283492506354935	0.45132787044123046	0.7014698203179827	-0.7532031105714398	NA
YNL198C	apj1dydj14x	-0.18731451371358954	0.7692132928089201	0.63841818992317	-0.2934040988652466	NA
YPR015C	apj1d	-0.3200910280175908	0.7035627741516475	0.8412035952761242	-0.3805155253913546	NA
YPR015C	sis14xcga	-0.771017243844387	0.4330847563964528	0.9835358119253055	-0.7839239146107898	0.9792828732932796
YPR015C	ydj14xcga	0.9807418238741028	0.22836198151561682	0.8141712847884477	1.2045890615375072	NA
YPR015C	apj1dsis14x	0.699651680754398	0.3961555723820426	0.824567773369769	0.8485071856436066	NA
YPR015C	apj1dydj14x	-0.293493767872218	0.726042474980025	0.8376089483205192	-0.35039473785553416	0.9577491630334464
PHO91	apj1d	0.19109770640220297	0.4705675624425226	0.2648411677048503	0.7215558972884835	0.9997008385809374
PHO91	sis14xcga	-0.3581615523513761	0.23128112176289795	0.29919968962482474	-1.1970652536454345	0.9792828732932796
PHO91	ydj14xcga	-0.0168084788806353	0.9494743111161669	0.2652562749372122	-0.06336694159116112	0.9942220709878937
PHO91	apj1dsis14x	0.1039452345380357	0.6959493989530562	0.2659846222446969	0.3907941506573624	0.9995467300026422
PHO91	apj1dydj14x	0.06363011002484968	0.8101710126859911	0.2648987280052695	0.24020541927095976	0.9694495315065704
YGR125W	apj1d	0.09512507260580975	0.7799349206477932	0.3404572782545198	0.2794038450095813	0.9997008385809374
YGR125W	sis14xcga	-0.40994126572516676	0.2876664166054346	0.38555317631837005	-1.0632548009062652	0.9792828732932796
YGR125W	ydj14xcga	-0.07257829267049573	0.831345719289404	0.34078163155388946	-0.2129759527811245	0.9771957909368024
YGR125W	apj1dsis14x	-0.08468742632710215	0.8047522774905047	0.3425845847524218	-0.24720150904718566	0.9995467300026422
YGR125W	apj1dydj14x	0.11272378060135746	0.7401794579687677	0.33992292391775425	0.3316157065906842	0.9599413141975147
SPE3	apj1d	0.02138846997900865	0.8638611609153335	0.12474235482298128	0.17146116897793445	0.9997008385809374
SPE3	sis14xcga	-0.22573467619168977	0.10701818636044756	0.14005637103346255	-1.611741576095505	0.9792828732932796
SPE3	ydj14xcga	-0.38359508324633595	0.002171502106133208	0.1251241835549889	-3.0657149748973644	0.04251775425559045
SPE3	apj1dsis14x	-0.04935854458149421	0.6933921654952298	0.12519420136305393	-0.3942558364852545	0.9995467300026422
SPE3	apj1dydj14x	-0.4248583038815017	6.801397246542657e-4	0.1250516630493896	-3.397462244973922	0.024924286993059448
ECO1	apj1d	-0.23439871225598993	0.3821602524236809	0.2682144123146621	-0.8739228821939647	0.9997008385809374
ECO1	sis14xcga	-0.4011800689114131	0.2048239205741165	0.3164062126063818	-1.2679272812209044	0.9792828732932796
ECO1	ydj14xcga	-0.4225846800320214	0.12176956186857318	0.2730953766221725	-1.5473886275880364	NA
ECO1	apj1dsis14x	-0.5317396616503136	0.061998716340825016	0.2849157471115044	-1.8663049236173401	0.9995467300026422
ECO1	apj1dydj14x	-0.3026614399328201	0.2616345986570545	0.26962291886108375	-1.122536026281796	0.7457623671452435
YPS5	apj1d	-0.9158684276016318	0.3790061236628862	1.0410801567109607	-0.8797290215338415	NA
YPS5	sis14xcga	-2.487114469934522	0.13065608588531571	1.6454396340810329	-1.511519729086603	0.9792828732932796
YPS5	ydj14xcga	0.8708089213833597	0.3539369248242834	0.9394042297047599	0.9269799877918811	NA
YPS5	apj1dsis14x	0.10126936019567037	0.919692549216865	1.0044470038027464	0.1008210087862014	NA
YPS5	apj1dydj14x	0.48815266542756175	0.6079949044338395	0.9516802339276875	0.5129376948525061	NA
TFC6	apj1d	-0.18060391670795645	0.22066422567710686	0.1474602007577627	-1.2247638059617179	0.9997008385809374
TFC6	sis14xcga	-0.046923097129628666	0.7834183733782445	0.17071196804343686	-0.2748670621481518	0.988251993958159
TFC6	ydj14xcga	-0.06162322614607333	0.675760258839954	0.14733389882037318	-0.41825558571013755	0.9248165943166299
TFC6	apj1dsis14x	-0.24057663461320947	0.12150050778095546	0.15536047508773396	-1.548506043621152	0.9995467300026422
TFC6	apj1dydj14x	-0.02982745576182444	0.8383866588590891	0.146243438140693	-0.20395756651405475	0.9754035258951463
AQY3	apj1d	-0.11299945619740014	0.8345315218562716	0.5409433780771844	-0.20889331633758687	0.9997008385809374
AQY3	sis14xcga	0.9603536602765148	0.10729225233646472	0.5963137205380307	1.6104839234791128	0.9792828732932796
AQY3	ydj14xcga	0.2366418781546636	0.6609990530954808	0.5396200687502083	0.4385342426250752	NA
AQY3	apj1dsis14x	-0.06405564689517197	0.9071164895884608	0.5490025816272938	-0.11667640378904083	NA
AQY3	apj1dydj14x	0.1195356017140456	0.82457745829051865	0.5392710956161687	0.22166142907671468	0.973082244323618
YBR201C-A	apj1d	-0.005763449395074604	0.9949596491942475	0.9123445730264924	-0.006317184938093829	NA
YBR201C-A	sis14xcga	-0.27747609600774675	0.8092428141400582	1.1494311794889953	-0.24140296605761538	0.9905705732056362
YBR201C-A	ydj14xcga	1.7625725399800114	0.029277579633993935	0.8086201551566868	2.1797286757445176	NA
YBR201C-A	apj1dsis14x	1.5905490350937461	0.056877975106097794	0.8352638741029992	1.9042473694936914	NA
YBR201C-A	apj1dydj14x	1.7905881530291643	0.026167584788794218	0.8052235415361013	2.2237156027670424	NA
BUD6	apj1d	0.2618092773489421	0.030110634856118725	0.12072554456824174	2.1686319849313325	0.9997008385809374
BUD6	sis14xcga	0.13089142558427735	0.35590856056810516	0.14178178263574343	0.9231893064890793	0.9792828732932796
BUD6	ydj14xcga	0.25932018101841203	0.03287655270013768	0.1215418477407999	2.133587614789584	0.2393966303363027
BUD6	apj1dsis14x	0.06711924557685219	0.5995092375076437	0.1278202807214832	0.5251063852934508	0.9995467300026422
BUD6	apj1dydj14x	0.23745192194665898	0.049902819007985925	0.12109975534002346	1.9607960501649433	0.3732223596663542
CWH43	apj1d	0.041206471541813214	0.9142201442957663	0.38254363219940807	0.10771704996080961	0.9997008385809374
CWH43	sis14xcga	-0.45446083813357174	0.28953181992559424	0.42908102352522515	-1.0591492357313597	0.9792828732932796
CWH43	ydj14xcga	-0.06713463612860325	0.8606597906357208	0.38245870482091043	-0.17553433947866245	0.9814460160950513
CWH43	apj1dsis14x	-0.19372869408804635	0.6130785348234311	0.38310231666718386	-0.5056839535020252	0.9995467300026422
CWH43	apj1dydj14x	-0.10947646870971245	0.774698764992012	0.38247168084606026	-0.2862341820119625	0.9665870595653628
MUS81	apj1d	0.12114795201142267	0.6000362619628441	0.23104477800085332	0.5243483668389823	0.9997008385809374
MUS81	sis14xcga	-0.24366478423313492	0.39353763337912206	0.28558279055394664	-0.8532194246036215	0.9792828732932796
MUS81	ydj14xcga	0.14427884961803247	0.5347154165111705	0.23239894836338804	0.6208240210813366	NA
MUS81	apj1dsis14x	0.37075197083373157	0.11804014070153594	0.2371973198818477	1.5630529510974656	0.9995467300026422
MUS81	apj1dydj14x	0.344875296442297	0.13000502256411423	0.22777846759969114	1.5140820819305776	0.579869187075605
EHT1	apj1d	0.07818756911519271	0.6415320843766892	0.16794386423538218	0.4655577592618014	0.9997008385809374
EHT1	sis14xcga	0.1610515138174149	0.39288976577819035	0.18849915915982207	0.8543884998493004	0.9792828732932796
EHT1	ydj14xcga	0.010785183791442493	0.9489160232323494	0.16833944267888706	0.06406807352936043	0.9942220709878937
EHT1	apj1dsis14x	0.2585604635929638	0.12556922289578365	0.16879403578583457	1.531810424398079	0.9995467300026422
EHT1	apj1dydj14x	0.22612450841958714	0.17724300986465338	0.16758745489958277	1.3492925741671975	0.6591341529639013
VAC8	apj1d	0.04052661485788852	0.9089552019056497	0.35438840502631364	0.11435649215125812	0.9997008385809374
VAC8	sis14xcga	0.6162686406862466	0.11966085203421065	0.39600896940370456	1.556198693211926	0.9792828732932796
VAC8	ydj14xcga	0.00821640947467034	0.9815060876860814	0.35444956600433053	0.023180757610435206	0.9977891379887077
VAC8	apj1dsis14x	-0.06313400457416422	0.8587364777657026	0.3547196802350225	-0.177982807529411	0.9995467300026422
VAC8	apj1dydj14x	-0.1940134391733094	0.5841701421761099	0.3544895818286089	-0.5473036419646103	0.9184434316875454
MIA40	apj1d	-0.050521535952858077	0.8232041527738551	0.22612224572001544	-0.22342576597003128	0.9997008385809374
MIA40	sis14xcga	0.18627521776409478	0.4613274916610253	0.25286364612760703	0.736662705836692	0.9792828732932796
MIA40	ydj14xcga	-0.1292108436075972	0.5681071906290482	0.2263515837713242	-0.5708413497920775	0.9040838004017948
MIA40	apj1dsis14x	0.16957053856437776	0.45421903348986115	0.22657747227938949	0.7483998160032552	0.9995467300026422
MIA40	apj1dydj14x	-0.17559515230978576	0.4376869203363754	0.22625176356432444	-0.776105120877271	0.870888630913817
ELM1	apj1d	-0.06718343382802634	0.7354673993201054	0.1988489098893581	-0.33786171553773164	0.9997008385809374
ELM1	sis14xcga	0.09646323221672884	0.6726699304733712	0.2283226217639649	0.4224865301189932	0.9838668840705705
ELM1	ydj14xcga	-0.13959903159126774	0.4879571404546444	0.20127847064815935	-0.6935616667879544	NA
ELM1	apj1dsis14x	-0.20061728392818617	0.33956673773040164	0.21006568743223034	-0.955021671461255	0.9995467300026422
ELM1	apj1dydj14x	-0.027010539331911356	0.8918581987924106	0.19867512746974084	-0.13595330062654767	0.9859577703565844
ASI1	apj1d	0.03831860616021229	0.9186148737179918	0.37501577955833854	0.10217865020330788	0.9997008385809374
ASI1	sis14xcga	-0.37533574548476095	0.3812856380775394	0.42869551015958857	-0.8755299194643685	0.9792828732932796
ASI1	ydj14xcga	-0.12734160326314892	0.7348372234525241	0.3759738506702256	-0.3386980318874433	NA
ASI1	apj1dsis14x	-0.02725163584472731	0.9426409515720309	0.3787530254426761	-0.07195093903969836	0.9995467300026422
ASI1	apj1dydj14x	0.11820166319773585	0.7517836947728589	0.3737149464247501	0.3162882949385502	0.9624363312266803
MSB4	apj1d	-0.06030464112843017	0.8802960953926571	0.40044551729131017	-0.15059387238579236	0.9997008385809374
MSB4	sis14xcga	-0.24893557774598205	0.5827467723590842	0.4531234276936565	-0.5493769744218128	0.9838668840705705
MSB4	ydj14xcga	0.13049151093439457	0.7441573414438568	0.39984782279920267	0.32635293602667775	NA
MSB4	apj1dsis14x	-0.10610703972190576	0.7930387304993423	0.40442263844878934	-0.2623667164847443	0.9995467300026422
MSB4	apj1dydj14x	0.2941196223274942	0.46042225662522884	0.39845415741182094	0.7381517217387391	0.8778060958687229
RPL2A	apj1d	0.09225034347010587	0.47837182461460087	0.1301273225739233	0.7089237036879776	0.9997008385809374
RPL2A	sis14xcga	-0.09837640837980334	0.49913133255912157	0.14555798570085288	-0.6758571706397756	0.9816226614664663
RPL2A	ydj14xcga	-0.016433992377471587	0.8995201747414716	0.13015218687595642	-0.12626750861385264	0.9892031433099134
RPL2A	apj1dsis14x	0.05408083955329304	0.6778498031155757	0.13019009010962546	0.41539904848176024	0.9995467300026422
RPL2A	apj1dydj14x	-0.12628930409616065	0.3318746007028978	0.13014888141971565	-0.9703449059150322	0.8130465496328653
SPT5	apj1d	-0.045549879518940774	0.6684605608810685	0.1063599051929647	-0.4282617536777733	0.9997008385809374
SPT5	sis14xcga	-0.1183709325935551	0.32204070915685895	0.11953363855478576	-0.9902729811014851	0.9792828732932796
SPT5	ydj14xcga	-0.018902788434491037	0.8590675528664617	0.10645784267328091	-0.17756125767552597	0.9814460160950513
SPT5	apj1dsis14x	-0.052017127825241864	0.6267696131523333	0.10696979526957211	-0.48627865178347496	0.9995467300026422
SPT5	apj1dydj14x	-0.030628037978257867	0.7733536628257159	0.10635069438970547	-0.2879909543987199	0.9665870595653628
TOM71	apj1d	-0.003172099060074492	0.9887282219713951	0.22453287048308315	-0.014127548689195088	0.9997008385809374
TOM71	sis14xcga	-0.2511294688970729	0.3228744670853656	0.2540335377233814	-0.9885681676036384	0.9792828732932796
TOM71	ydj14xcga	0.14901243779248688	0.5062197283715539	0.22416803899871424	0.6647354299840289	0.8729606193609584
TOM71	apj1dsis14x	-0.1592500659174443	0.4827629155351679	0.22689535023780777	-0.701865709237916	0.9995467300026422
TOM71	apj1dydj14x	-0.0728706577032502	0.7455744803911573	0.22457656544226778	-0.32448023933282194	0.9609740628537812
SFT1	apj1d	0.026572320119585213	0.8780427389060058	0.17316501213380006	0.1534508604951529	0.9997008385809374
SFT1	sis14xcga	0.04078104528438432	0.8412562611767697	0.203613213450725	0.20028683106194112	0.9907292550326111
SFT1	ydj14xcga	-0.05384727673204757	0.7592575815159941	0.17570973015265762	-0.3064558615238026	NA
SFT1	apj1dsis14x	0.0812722785130401	0.6537401931873732	0.18117987192040932	0.4485723367148768	0.9995467300026422
SFT1	apj1dydj14x	0.2137277575001155	0.21184799860512585	0.17118762748565813	1.248500026779221	0.6970918333777801
CLB1	apj1d	0.32801642101010803	0.151407039545289	0.2286499179734353	1.4345792201343242	0.9997008385809374
CLB1	sis14xcga	0.43136633787821815	0.09354615840470266	0.2572278915048931	1.6769811988682126	0.9792828732932796
CLB1	ydj14xcga	0.11156834703997626	0.6288034000412384	0.23079361396790365	0.48341175963166816	0.9129927383661508
CLB1	apj1dsis14x	0.3281619674273628	0.1580312708526413	0.2324547778213205	1.411723908207251	0.9995467300026422
CLB1	apj1dydj14x	0.10153286809481758	0.6590493383089524	0.23011529452406865	0.44122607454150714	0.93979732446328
VPS27	apj1d	0.08003768759927198	0.5135102015031603	0.12249758680937607	0.6533817496651765	0.9997008385809374
VPS27	sis14xcga	-0.06370166879431198	0.6594261406270199	0.14454472221871673	-0.440705601813135	0.9838668840705705
VPS27	ydj14xcga	0.10924014226693428	0.37482623052148645	0.12309172746747021	0.8874694060638922	0.79659601592524
VPS27	apj1dsis14x	0.08550897511290938	0.5024328253006309	0.12749844887448425	0.6706667874609881	0.9995467300026422
VPS27	apj1dydj14x	5.496458690887181e-4	0.9964435822103718	0.12331298700605542	0.004457323453382304	0.9996152519634907
RTT107	apj1d	-9.563790481167271e-4	0.9933741639591489	0.11516604116639677	-0.008304349428273827	0.9997008385809374
RTT107	sis14xcga	-0.2491133100168758	0.06603550609200771	0.13552152706523052	-1.8381825781594847	0.9792828732932796
RTT107	ydj14xcga	-0.3215907933026412	0.006380220344839558	0.11790365752605592	-2.7275726644151965	0.0895360772014053
RTT107	apj1dsis14x	-0.13284917559306728	0.26816295180930505	0.11997545091608772	-1.107302990559157	0.9995467300026422
RTT107	apj1dydj14x	-0.28543532215703865	0.014730438208599544	0.11703256014758592	-2.438939401112695	0.19288467103419304
MHR1	apj1d	-0.07014951907061816	0.6235944677465819	0.14293986505663978	-0.49076245484645925	0.9997008385809374
MHR1	sis14xcga	0.25890364569848523	0.10667116458610668	0.1604770340049859	1.6133376797731773	0.9792828732932796
MHR1	ydj14xcga	0.0448099352276342	0.7537976462502919	0.14287250214388572	0.313635826035345	0.9494923530423357
MHR1	apj1dsis14x	0.06436425717934942	0.658947796512168	0.14582955104824266	0.4413663535044192	0.9995467300026422
MHR1	apj1dydj14x	-0.1431567177418063	0.31836408023466634	0.14346871932736777	-0.9978252988733416	0.8053726037384152
ECM31	apj1d	-0.034616937994811546	0.8140881551999131	0.14720880096699934	-0.23515535598018916	0.9997008385809374
ECM31	sis14xcga	0.014275676243069945	0.9333534627726782	0.17070773513209866	0.08362641699875525	0.9979069978915025
ECM31	ydj14xcga	0.08051954484595786	0.5842150727751765	0.1471380105175858	0.5472382327497506	0.9046168927967994
ECM31	apj1dsis14x	0.0252549631305887	0.8686207076547068	0.15268031843915983	0.16541073131604922	0.9995467300026422
ECM31	apj1dydj14x	-0.006935275298822507	0.9624193074366495	0.1471900035127488	-0.04711784179162555	0.9958293089450293
SPH1	apj1d	-0.11003073121712197	0.7919590161744549	0.41715032034010724	-0.2637675817374722	NA
SPH1	sis14xcga	-0.18483188904298667	0.7036330359668346	0.4858616094663932	-0.3804208553254122	0.9854540024253493
SPH1	ydj14xcga	-0.20831749976343952	0.6218859917825212	0.42239719506035295	-0.49317917400865957	NA
SPH1	apj1dsis14x	0.2100093397047054	0.6197337741358093	0.42321164723938726	0.49622769381371684	NA
SPH1	apj1dydj14x	0.17326189544363055	0.6742047697864807	0.4121512501973949	0.42038425301548604	0.9429574795025865
MTF2	apj1d	0.04718857825157407	0.8303862907386687	0.22029514804680625	0.2142061623688048	0.9997008385809374
MTF2	sis14xcga	0.05155232104318911	0.8388464697015539	0.2534912878997599	0.20336920243024234	0.9907292550326111
MTF2	ydj14xcga	0.016724739641224944	0.939873256374142	0.22172776309692693	0.07542916325689818	NA
MTF2	apj1dsis14x	0.02306444198920512	0.9193337211382495	0.22774514467256918	0.10127303491964683	0.9995467300026422
MTF2	apj1dydj14x	0.03661930263164934	0.8681235769375297	0.22054186737949172	0.16604240757895472	0.9790741858301656
1	apj1d	-0.11846260981369809	0.481222017970393	0.16818989145339538	-0.7043384640421361	0.9997008385809374
1	sis14xcga	-0.36064089883757183	0.06238471316323998	0.19352344045849915	-1.8635515056115943	0.9792828732932796
1	ydj14xcga	-0.47606302395658584	0.00531057550018993	0.1707809423756294	-2.787565271243757	0.07880131986604699
1	apj1dsis14x	-0.10954529835648752	0.5223197657409757	0.1712250861835121	-0.6397736499842162	0.9995467300026422
1	apj1dydj14x	-0.5245969680032703	0.0020851727311633557	0.17044404891942966	-3.0778250770799964	0.05447255694232193
PRO3	apj1d	0.05550342458246053	0.3768417918048681	0.0628058371894353	0.8837303516080965	0.9997008385809374
PRO3	sis14xcga	0.03776178014556565	0.5951448300547519	0.07106155295466168	0.5313953688805284	0.9838668840705705
PRO3	ydj14xcga	0.00534151721093164	0.9325257315264562	0.0630881623135757	0.08466750361790487	0.9918968094416397
PRO3	apj1dsis14x	0.08039798940829126	0.20684793220930023	0.06369265806239108	1.2622803295402782	0.9995467300026422
PRO3	apj1dydj14x	-0.08088023380405372	0.199434380957233	0.06303184144935854	-1.283164698100008	0.681443925024085
RPS4A	apj1d	0.07425249886418506	0.45734785619386836	0.09990634423181004	0.743221058033101	0.9997008385809374
RPS4A	sis14xcga	-0.19256695221756573	0.08507271595094969	0.1118286446389387	-1.721982349328358	0.9792828732932796
RPS4A	ydj14xcga	-0.02649409594068488	0.7909340930653626	0.0999408225085552	-0.26509783765704864	0.9646129451929448
RPS4A	apj1dsis14x	-0.037426495968421285	0.7082472008871807	0.10001436934089943	-0.3742111880029249	0.9995467300026422
RPS4A	apj1dydj14x	-0.13256698592405616	0.18466928782672554	0.0999363154642436	-1.326514643933291	0.669530795654209
YMR1	apj1d	0.22182635432921607	0.3834821320922152	0.2545344650548167	0.8714983029172235	0.9997008385809374
YMR1	sis14xcga	0.32195149740792894	0.26595609817940746	0.2894145014739673	1.1124235163347138	0.9792828732932796
YMR1	ydj14xcga	0.20146680668856684	0.43127267051059137	0.25598829155550484	0.7870157086652678	NA
YMR1	apj1dsis14x	0.07902967486238453	0.7652423582588411	0.26466398715407025	0.29860380972942335	0.9995467300026422
YMR1	apj1dydj14x	0.16322364562367556	0.5227324759586431	0.25538049148877456	0.6391390535437597	0.9005743635761541
YDR433W	apj1d	-0.03404081786619095	0.7658720619520014	0.11431582010241227	-0.29777871370467146	0.9997008385809374
YDR433W	sis14xcga	-0.04279073012196669	0.7387266593042406	0.12829262784161014	-0.33354005480966575	0.9872814001744901
YDR433W	ydj14xcga	-0.10777876929986854	0.34663494937899997	0.11451981457366542	-0.9411364286705104	0.7711158633862627
YDR433W	apj1dsis14x	-0.022557354424520337	0.8443403319074604	0.11488646167326876	-0.1963447572149302	0.9995467300026422
YDR433W	apj1dydj14x	-0.19442273630158402	0.08943554512410878	0.11447521824056257	-1.698382752964198	0.49470793670851365
WIP1	apj1d	-0.25166030389385763	0.3653268534404242	0.27799734826364514	-0.9052615266502104	0.9997008385809374
WIP1	sis14xcga	0.16807026944661982	0.5909520146668992	0.3127139200586152	0.5374569491985411	0.9838668840705705
WIP1	ydj14xcga	-0.4346144702428978	0.1257965783295601	0.28389660070006584	-1.5308900112617552	NA
WIP1	apj1dsis14x	-0.1781324859960856	0.5372154041633994	0.28869372632138957	-0.617029293521186	NA
WIP1	apj1dydj14x	-0.14291451128498972	0.6052893819012681	0.27653246321341746	-0.5168091645525669	0.9271152367020118
CIR1	apj1d	-0.03805359176425069	0.741509364962136	0.11536452997661849	-0.32985521435369436	0.9997008385809374
CIR1	sis14xcga	0.25243070420830654	0.05183138938666147	0.1298156922895182	1.9445315104535228	0.9792828732932796
CIR1	ydj14xcga	-0.06192233570628199	0.5936891668014364	0.11606862869282972	-0.5334976074384113	0.9078405176517683
CIR1	apj1dsis14x	0.12321452630854415	0.2946600666820107	0.11757633838374838	1.0479534233018357	0.9995467300026422
CIR1	apj1dydj14x	0.1490096556582856	0.19335397681160035	0.1145592770854874	1.3007209843607024	0.6765534852746193
ASE1	apj1d	0.06949543480931325	0.6779766297908332	0.16736782377961165	0.4152257778103405	0.9997008385809374
ASE1	sis14xcga	0.013411851260979907	0.9446913590476262	0.19332479077486855	0.06937470981979924	0.9981770693971025
ASE1	ydj14xcga	0.13937232795658927	0.40611736079568667	0.16776775966609467	0.8307455987609279	0.8065199966221102
ASE1	apj1dsis14x	0.03502502386852964	0.8396441718331997	0.17309245417748215	0.20234864676779246	0.9995467300026422
ASE1	apj1dydj14x	0.19265032961891843	0.24752282453000607	0.16659673642869136	1.1563871762960904	0.7334552830793833
LEM3	apj1d	-0.06509701681755513	0.8185066521030432	0.28368901439974575	-0.22946611787309826	0.9997008385809374
LEM3	sis14xcga	-0.3820678301510627	0.2315434385471229	0.31934991218846376	-1.1963924697295238	0.9792828732932796
LEM3	ydj14xcga	-0.24216808217535457	0.39369754449910144	0.28392457237534124	-0.8529310448523433	0.803770309129499
LEM3	apj1dsis14x	-0.18575171890967268	0.5143084104490786	0.2848324537840986	-0.652143800476021	0.9995467300026422
LEM3	apj1dydj14x	-0.2396271200423335	0.39843472299227867	0.28377715618186716	-0.8444200486975112	0.8567021968405854
SNF8	apj1d	0.28064353160662536	0.2567973166750785	0.2474825089000231	1.133993399590104	0.9997008385809374
SNF8	sis14xcga	0.34749688653783517	0.2213831115322399	0.28416767846894464	1.2228585897245576	0.9792828732932796
SNF8	ydj14xcga	0.4620020859914104	0.06076874932993927	0.24637820995291107	1.875174294348962	NA
SNF8	apj1dsis14x	0.31598748253117914	0.21797424639007004	0.2564973696720858	1.2319326429551591	0.9995467300026422
SNF8	apj1dydj14x	0.32999960062074635	0.18175567112078503	0.24712244339397374	1.3353687997275347	0.6651350045106675
DAN1	apj1d	-3.443855697466288	1.1503543150636887e-4	0.8930068747119679	-3.8564716521102658	0.07215248970380013
DAN1	sis14xcga	-1.6267379151433852	0.09437959757185803	0.9725022291003829	-1.6727343819542766	0.9792828732932796
DAN1	ydj14xcga	-1.1908339462741218	0.16641450260284518	0.8605429504088904	-1.3838169793945698	NA
DAN1	apj1dsis14x	-0.9023051402026371	0.2947116070025709	0.8611083652397743	-1.0478415686408895	0.9995467300026422
DAN1	apj1dydj14x	-3.793069152636573	2.4839638957880635e-5	0.899630602480102	-4.216251806218951	0.0017955996545306319
PHO85	apj1d	-0.0950625465037431	0.39817641219681765	0.11251569260911268	-0.8448825608175118	0.9997008385809374
PHO85	sis14xcga	0.1610689485758711	0.20748031313583176	0.12777933567725877	1.2605242289151841	0.9792828732932796
PHO85	ydj14xcga	-0.10214796237229187	0.36744581750476146	0.11333804907603144	-0.901268049035917	0.7905580039813106
PHO85	apj1dsis14x	-0.09916590621085841	0.396805111701332	0.1170318831129434	-0.8473409431099801	0.9995467300026422
PHO85	apj1dydj14x	-0.02819178985325229	0.8016880677506107	0.1122449831014266	-0.25116302817541236	0.9694495315065704
NTA1	apj1d	-0.011239127613164883	0.9424433980823851	0.15566835635246784	-0.07219917956682856	0.9997008385809374
NTA1	sis14xcga	0.06104057810813844	0.734930683923966	0.18028726653533356	0.3385739840710016	0.9872814001744901
NTA1	ydj14xcga	0.13205685854596	0.3952155587516321	0.15532500770856028	0.8501970191029457	0.8039896015209897
NTA1	apj1dsis14x	-0.17002575928984454	0.3024124862840877	0.16486967398870875	-1.0312737035040713	0.9995467300026422
NTA1	apj1dydj14x	0.23970877542804842	0.11848697356764752	0.15354570089661346	1.5611558905804268	0.5548759721594895
CAT8	apj1d	-0.5544548424575644	0.35889528245797125	0.6043288017401405	-0.91747214572768	0.9997008385809374
CAT8	sis14xcga	1.2162233291803883	0.06333696207432125	0.6550038375529044	1.8568186313597812	0.9792828732932796
CAT8	ydj14xcga	0.2800740721757303	0.6378274625449487	0.5949673789157375	0.4707385347514926	NA
CAT8	apj1dsis14x	-0.201027890154374	0.7409337902728038	0.6080385444486192	-0.330617017604813	NA
CAT8	apj1dydj14x	0.1374302321994343	0.8173917790075416	0.5951913682755545	0.23090091611645902	0.9711255389747546
FYV6	apj1d	0.29469042391760336	0.4332806370018796	0.37607724356319816	0.7835901505911828	0.9997008385809374
FYV6	sis14xcga	0.1024377702182512	0.8118931868838051	0.4304389971181913	0.23798440871778986	0.9905705732056362
FYV6	ydj14xcga	0.04250334533110611	0.9111081889936782	0.38071502716471706	0.11164083973159526	NA
FYV6	apj1dsis14x	0.30658456911204873	0.4237263337384766	0.38324355743933247	0.7999731845735754	NA
FYV6	apj1dydj14x	-0.060469373447215445	0.8737803793779004	0.38064934494096425	-0.1588584723732909	0.9798000556687592
CAF20	apj1d	-0.009306213771778996	0.927441113967938	0.10219333179100844	-0.09106478484144902	0.9997008385809374
CAF20	sis14xcga	-0.17022916124398357	0.1408158998458035	0.11558517375140484	-1.4727594873898313	0.9792828732932796
CAF20	ydj14xcga	0.048828492254180365	0.6332094695549093	0.1023198250115603	0.47721438390520726	0.9169981415036883
CAF20	apj1dsis14x	-0.06228443335853499	0.5466067283054764	0.1033161834621833	-0.6028526342277528	0.9995467300026422
CAF20	apj1dydj14x	-0.05316469385291431	0.6032151028126782	0.10228255632655761	-0.5197826077320099	0.9269619296354898
YOR015W	apj1d	-2.0305102604365257	0.11282062780160683	1.2805606427172083	-1.585641626567569	NA
YOR015W	sis14xcga	-1.2718779174466301	0.37667330837817764	1.4387068690714004	-0.8840424305943236	0.9792828732932796
YOR015W	ydj14xcga	-0.32190825703734555	0.7634383337308944	1.069573736107009	-0.3009687375168861	NA
YOR015W	apj1dsis14x	-0.5718017654572521	0.6167975829125742	1.142702774692211	-0.5003941340837892	NA
YOR015W	apj1dydj14x	-1.088381132842263	0.3397512245036404	1.1400756806115382	-0.9546569156342796	NA
SUL2	apj1d	0.052429627419174694	0.9087663766417308	0.4575222502128863	0.1145947052734136	NA
SUL2	sis14xcga	0.4077963605952885	0.42567226432719746	0.5119088228215328	0.7966191290620886	0.9792828732932796
SUL2	ydj14xcga	0.20560696594050318	0.6529502908280438	0.4572423354173532	0.44966738644800475	NA
SUL2	apj1dsis14x	-0.6180810517954669	0.2046522865468088	0.48728883157129765	-1.2684079990145072	NA
SUL2	apj1dydj14x	-0.3964623089438349	0.3951402043148747	0.4662438147321824	-0.850332586549312	0.8535513228921857
QCR9	apj1d	0.38589014147291373	0.13804422178366138	0.2601891940013921	1.4831136356525592	0.9997008385809374
QCR9	sis14xcga	-0.1711538492317481	0.5728122685511352	0.3035102407442325	-0.5639145776829952	0.9838668840705705
QCR9	ydj14xcga	0.6983495261884072	0.007080662455127008	0.2593177253361393	2.6930265768881596	NA
QCR9	apj1dsis14x	0.3633066325349276	0.17117129031661574	0.26548770949775935	1.3684499113809028	0.9995467300026422
QCR9	apj1dydj14x	0.8152680019833374	0.0015702614520862834	0.2578839829191823	3.16137509881268	0.04588316932641475
YIM2	apj1d	0.30579729507071146	0.7521308762556376	0.9682311394375138	0.31583088233287143	NA
YIM2	sis14xcga	0.8577404558148359	0.42097268746899125	1.0658671295385904	0.8047348792772588	0.9792828732932796
YIM2	ydj14xcga	-0.0013765470942073768	0.9988976518466406	0.9963506728134861	-0.0013815889643756605	NA
YIM2	apj1dsis14x	-0.7997827718110525	0.48345638669533036	1.1413170293255537	-0.7007542613148194	NA
YIM2	apj1dydj14x	-0.07756075777232568	0.9379728211969358	0.9966942009046645	-0.07781800847434096	NA
MDJ2	apj1d	-0.13993011647040113	0.7209903985694368	0.39181244023725637	-0.3571354610018724	NA
MDJ2	sis14xcga	0.36430512102550205	0.4060556052078114	0.43847020924937713	0.8308548980993732	0.9792828732932796
MDJ2	ydj14xcga	0.3015053373112062	0.430314118669748	0.38230357630399625	0.7886542423329523	NA
MDJ2	apj1dsis14x	0.02374748157029147	0.9536045335392412	0.4081662720555043	0.058180901255511334	NA
MDJ2	apj1dydj14x	0.08738352263288289	0.8210735512834368	0.38637168061474475	0.22616440856599404	0.9723530363830107
THI13	apj1d	-0.2187501523520398	0.7017078120186968	0.5711251853325661	-0.38301611970528254	NA
THI13	sis14xcga	1.0298986710133113	0.08505757277850519	0.5980599479107105	1.7220659477552471	0.9792828732932796
THI13	ydj14xcga	0.7119909958684719	0.18836528088590776	0.5412608484055295	1.315430439807141	NA
THI13	apj1dsis14x	-0.6028549603849898	0.33775154420742837	0.6288796615248281	-0.9586173591991559	NA
THI13	apj1dydj14x	0.3852539101825147	0.4823628820089181	0.5483984830187751	0.7025072499504434	NA
MAL11	apj1d	-1.5724553756225168	0.21901995668080898	1.2793152513307056	-1.2291383019055668	NA
MAL11	sis14xcga	-2.144036688408867	0.14057591479395928	1.4549160449223553	-1.4736497654909622	0.9792828732932796
MAL11	ydj14xcga	-2.0746457140082732	0.10690340481784857	1.2867862915543795	-1.6122690516870484	NA
MAL11	apj1dsis14x	-0.411716482940556	0.7462363028715464	1.2722768192494398	-0.3236060554678988	NA
MAL11	apj1dydj14x	-3.6950599468771195	0.005543524753836543	1.3322124187062898	-2.7736267092190814	0.10447564330712655
RPB10	apj1d	-0.09636277125210424	0.46572635401214485	0.13210330001120157	-0.7294501442729534	0.9997008385809374
RPB10	sis14xcga	-0.159956049587775	0.2871589183347163	0.150281687195748	-1.0643748587905175	0.9792828732932796
RPB10	ydj14xcga	0.03975524649069055	0.7635308131291022	0.13214419689039028	0.3008474638024881	0.9510522579339811
RPB10	apj1dsis14x	-0.14379682138623603	0.285425697908576	0.1346147222219107	-1.0682102151441413	0.9995467300026422
RPB10	apj1dydj14x	-0.13873987748261568	0.2944319637038388	0.13232873322238767	-1.048448618105137	0.7823146652321347
RSM28	apj1d	-0.11188030167388784	0.5887951491860559	0.20696236298225115	-0.5405828386462835	0.9997008385809374
RSM28	sis14xcga	0.120390678393646	0.6057414835819543	0.23324218042764366	0.5161616915641619	0.9838668840705705
RSM28	ydj14xcga	-0.0682166432855233	0.7423407353918559	0.20749982178225193	-0.3287551897616043	0.9478255045319126
RSM28	apj1dsis14x	0.10783786241256688	0.6069449963459248	0.2096221939787552	0.5144391458067462	0.9995467300026422
RSM28	apj1dydj14x	-0.16737147947053124	0.419803024864132	0.2074605231957277	-0.8067630260077258	0.8660942520883554
COX17	apj1d	-0.2035848768170212	0.5300625295660419	0.32422591395182127	-0.627910564999666	0.9997008385809374
COX17	sis14xcga	0.2451376514643868	0.4977889557553784	0.36157447728284114	0.677972774258146	0.9816226614664663
COX17	ydj14xcga	-0.2055273884083904	0.5264296081603672	0.32444914689978877	-0.6334656459179127	0.8798980572845012
COX17	apj1dsis14x	0.20787072016575797	0.5216851468695127	0.324417841690382	0.6407499633270654	0.9995467300026422
COX17	apj1dydj14x	-0.8138405934373394	0.012959401251045588	0.32751666258887824	-2.4848830193990126	0.17625453711795766
BLI1	apj1d	-0.2330966309211639	0.3683046192745523	0.25909597757075037	-0.8996536075420665	0.9997008385809374
BLI1	sis14xcga	-0.167331485886537	0.5827137606566521	0.30455741719441387	-0.5494250884709899	0.9838668840705705
BLI1	ydj14xcga	0.05761814804816453	0.821634365120764	0.25557701976822045	0.22544338336998254	NA
BLI1	apj1dsis14x	-0.04738979613575295	0.8596456352308135	0.26800351992598037	-0.17682527508907903	NA
BLI1	apj1dydj14x	-0.4563842208360033	0.08482968342377516	0.26482764136212456	-1.7233254749716431	0.4813400423949048
YKL066W	apj1d	-1.192348323576501	0.2583938743669998	1.0549930262094593	-1.130195455282347	NA
YKL066W	sis14xcga	1.611886005746502	0.08878226742966722	0.9471338992618601	1.7018565241965369	0.9792828732932796
YKL066W	ydj14xcga	-0.021618798511920112	0.9816887033649009	0.9419208027693773	-0.022951821903028215	NA
YKL066W	apj1dsis14x	0.043600626795112625	0.9645430039694275	0.9808166712122492	0.04445339080668769	NA
YKL066W	apj1dydj14x	0.17964426978458178	0.8453900881431091	0.9212354095704529	0.19500365261507374	NA
YHL049C	apj1d	0.3555970723600234	0.6112356602379332	0.6995667508409303	0.5083104248916487	NA
YHL049C	sis14xcga	0.46712564772714765	0.5617295085649006	0.8050080318618179	0.5802745180650958	0.9838668840705705
YHL049C	ydj14xcga	0.3340734145531004	0.6363195908250577	0.7065090668072316	0.4728508525202708	NA
YHL049C	apj1dsis14x	0.9738442241919775	0.16282888199149168	0.6977859672804876	1.3956202472620423	NA
YHL049C	apj1dydj14x	0.8383599215431692	0.21816924700603507	0.6808125269440668	1.2314108339138212	NA
GCN5	apj1d	0.14049436150816869	0.4136769409871994	0.17187112982012842	0.817440146318948	0.9997008385809374
GCN5	sis14xcga	0.2530516459242649	0.19621417046617157	0.195797824308055	1.292412961270349	0.9792828732932796
GCN5	ydj14xcga	0.09571679335785384	0.580608104137996	0.17324410396934692	0.5524966862640796	0.9040838004017948
GCN5	apj1dsis14x	0.08203562325149201	0.6451187731420984	0.1781238705567768	0.4605537876258041	0.9995467300026422
GCN5	apj1dydj14x	0.11949293433910381	0.48778212340461435	0.17221955489318613	0.6938406873320258	0.8864775264175085
GCN3	apj1d	0.09453038864273819	0.4283874862660153	0.11936348085520394	0.7919540211583642	0.9997008385809374
GCN3	sis14xcga	-0.00662785865861095	0.9613130368716717	0.1366401669000361	-0.048505932106038714	0.9994389642405372
GCN3	ydj14xcga	0.13483111682507926	0.26007266112904676	0.11972011496168081	1.126219406556994	0.6797633773112288
GCN3	apj1dsis14x	-0.09865374385676434	0.42312652287079666	0.12316186512867103	-0.8010088492383394	0.9995467300026422
GCN3	apj1dydj14x	-0.09460730491727752	0.43135574304529145	0.12023186473326104	-0.7868738052692389	0.86875895576091
YHR140W	apj1d	-0.5079792497497332	0.5219672218038396	0.7933259512213523	-0.6403159369332136	NA
YHR140W	sis14xcga	0.15183318140142976	0.8625329727183949	0.8768845870343229	0.17315070152497358	0.9907292550326111
YHR140W	ydj14xcga	-0.4838262820994534	0.5429134891494027	0.7952265308338247	-0.6084131544154388	NA
YHR140W	apj1dsis14x	0.7090652706017626	0.35601020664405675	0.7682228549515787	0.9229942405793892	NA
YHR140W	apj1dydj14x	-0.3382737201135019	0.6670730873224191	0.7863749538982792	-0.43016848188842366	NA
YHL026C	apj1d	-0.5411043444385865	0.34279265668150377	0.5703869952845804	-0.9486617838624037	NA
YHL026C	sis14xcga	-1.277889429622349	0.0703007315693534	0.7060286960399634	-1.8099681171457889	0.9792828732932796
YHL026C	ydj14xcga	-0.11160943130633326	0.8423429948373207	0.5611406945300422	-0.19889741092437904	NA
YHL026C	apj1dsis14x	-0.16581958539838584	0.7724673972054139	0.5734746273766906	-0.28914894832734445	NA
YHL026C	apj1dydj14x	-0.795418390293543	0.1683733838270165	0.577457477529136	-1.3774492863042191	0.6419843543751199
ATP11	apj1d	-0.2549085189858836	0.3378908292601195	0.2659893666008997	-0.9583410128133347	0.9997008385809374
ATP11	sis14xcga	0.32556909219726005	0.27062855395083346	0.29553767133254133	1.101616219446106	0.9792828732932796
ATP11	ydj14xcga	0.22254087751798513	0.3988617764843391	0.2637816026483863	0.8436557943528232	0.8057592297842968
ATP11	apj1dsis14x	0.047124553379125106	0.8600118762294755	0.2672080294496661	0.17635904683022238	0.9995467300026422
ATP11	apj1dydj14x	-0.2799440630557149	0.2925752032826618	0.2659828589551113	-1.0524891121008657	0.7808031373472956
FEX2	apj1d	0.22614615758102152	0.6431282613094466	0.4880893551045812	0.463329419533368	NA
FEX2	sis14xcga	-0.06959726122785047	0.9018180545083878	0.5641571700202614	-0.12336502117902874	0.996754188156926
FEX2	ydj14xcga	0.5754390771422673	0.2336469334225938	0.48314936268032416	1.1910169433939761	NA
FEX2	apj1dsis14x	-8.691859200112765e-4	0.9986210721969692	0.5029340037186967	-0.0017282305701831876	NA
FEX2	apj1dydj14x	-0.0022774444083599825	0.996303489099614	0.49158010893361803	-0.004632905943449238	0.9996152519634907
TIS11	apj1d	-0.13781223552938043	0.7729615904420216	0.47768011308042463	-0.2885031881287	0.9997008385809374
TIS11	sis14xcga	-0.04377034398346425	0.9346965059774309	0.5341925952514479	-0.08193738433019886	0.9979069978915025
TIS11	ydj14xcga	-1.6009872535762524	8.386690697504953e-4	0.47937959458268636	-3.3397067202452737	0.022562243510604787
TIS11	apj1dsis14x	-0.19153613529842056	0.6886107503338202	0.47795481170181453	-0.40074109645728545	0.9995467300026422
TIS11	apj1dydj14x	-1.5086660082602354	0.0016389625467934208	0.4791116079341201	-3.1488821879424878	0.047261231472288966
PTP2	apj1d	-0.1838180816910218	0.47334941972602995	0.25635680482947254	-0.7170399935874407	0.9997008385809374
PTP2	sis14xcga	0.16885621629388042	0.5607433272395037	0.29026173883145046	0.5817377687244273	0.9838668840705705
PTP2	ydj14xcga	0.2941959153731354	0.2400203559326412	0.25039315919621524	1.1749359140542457	NA
PTP2	apj1dsis14x	-0.1133107113987853	0.6712354779056078	0.26695703033507284	-0.4244529962614681	0.9995467300026422
PTP2	apj1dydj14x	-0.06988169462704291	0.783923731719033	0.2548479504259475	-0.2742093648791137	0.9669858654234075
FRT1	apj1d	0.029911427396285075	0.8879740616239786	0.212336259510327	0.14086820341125172	0.9997008385809374
FRT1	sis14xcga	0.1707657838674286	0.483360841207891	0.24363531845178613	0.7009073436174323	0.9803744333627407
FRT1	ydj14xcga	0.012338517983433297	0.9540535025692197	0.21414621937695072	0.05761725805541507	NA
FRT1	apj1dsis14x	0.0634209962579806	0.773789611104684	0.2206550283688427	0.287421486502303	0.9995467300026422
FRT1	apj1dydj14x	0.09627155848485218	0.6495085165778814	0.21184421178908516	0.4544450739145112	0.93979732446328
PET191	apj1d	0.06972227412220405	0.7477499833713541	0.21679299090896778	0.32160760285594614	0.9997008385809374
PET191	sis14xcga	0.4093162054706196	0.09281714390469664	0.24353609902454962	1.6807208750985148	0.9792828732932796
PET191	ydj14xcga	0.1812971621115101	0.4028654429256029	0.21672921542050333	0.8365146422910861	NA
PET191	apj1dsis14x	0.3396040195083679	0.12360756897446493	0.22054982715212393	1.5398063280916856	0.9995467300026422
PET191	apj1dydj14x	-0.1353043713885567	0.5379883288133418	0.21970064491538918	-0.6158578707889771	0.903540005483757
TAD2	apj1d	0.22256750420829777	0.35895039759336267	0.24261557480721985	0.9173669266086808	0.9997008385809374
TAD2	sis14xcga	0.14750423553875663	0.6018532226135117	0.2827174216926445	0.5217373399051278	0.9838668840705705
TAD2	ydj14xcga	0.22849221800697814	0.3493407856228124	0.24414986188346102	0.9358687170424996	NA
TAD2	apj1dsis14x	0.312143480294485	0.21256613503306518	0.2504078702817668	1.2465402143441073	0.9995467300026422
TAD2	apj1dydj14x	0.1315328747897428	0.590339671418721	0.24432873252269358	0.5383438674267499	0.9223875173551391
RAD33	apj1d	-0.0039210800526742135	0.9871370102836388	0.2432120198985465	-0.016122065242950796	0.9997008385809374
RAD33	sis14xcga	0.1599309816780666	0.5661467966800127	0.2787538502307001	0.5737355073148076	0.9838668840705705
RAD33	ydj14xcga	0.1682026035266369	0.4874675117440679	0.24224734860923877	0.6943423921553792	NA
RAD33	apj1dsis14x	0.04684353425439465	0.8528296262394202	0.25251320037624675	0.185509249356459	0.9995467300026422
RAD33	apj1dydj14x	0.02805226967260743	0.9081414183566581	0.24312271628040016	0.11538316987316796	0.9859577703565844
VOA1	apj1d	0.21024485315442581	0.3767235826097701	0.23784718566832583	0.8839492994784011	0.9997008385809374
VOA1	sis14xcga	-0.1776996789727431	0.5053988910538199	0.2668086823905039	-0.666019101704719	0.9816226614664663
VOA1	ydj14xcga	-0.16899931124973216	0.4779920424976405	0.2381829230239518	-0.7095358017448526	0.8493782696484041
VOA1	apj1dsis14x	-0.06015116073642055	0.8009044018575712	0.2385277247592549	-0.2521768100422325	0.9995467300026422
VOA1	apj1dydj14x	-0.03770193366888868	0.8741165298793502	0.23796943131003803	-0.1584318349686216	0.9798089887160852
TGL4	apj1d	-0.025229999805661495	0.8641439619526087	0.1474563393078827	-0.17110149298486452	0.9997008385809374
TGL4	sis14xcga	-0.09751487652581707	0.567813202002526	0.1706968895436454	-0.5712750641591717	0.9838668840705705
TGL4	ydj14xcga	-0.43206794943443033	0.004390119421450906	0.15167310823102306	-2.8486786779388726	0.06815889884571277
TGL4	apj1dsis14x	0.042255536332647135	0.7802513587366227	0.15145815722304495	0.27899148588226574	0.9995467300026422
TGL4	apj1dydj14x	0.06509856729304488	0.6578352409645492	0.14698124399466106	0.4429039074904653	0.93979732446328
TSL1	apj1d	0.026074011964569464	0.9630646015842079	0.563053854236207	0.046308202614009884	0.9997008385809374
TSL1	sis14xcga	0.7821339734306529	0.21274818364385573	0.6276936236063202	1.2460441591504765	0.9792828732932796
TSL1	ydj14xcga	-0.3447988984389862	0.54123517902674	0.5643686504521348	-0.6109462284319941	0.8883426056490521
TSL1	apj1dsis14x	0.8382115622035932	0.13599593229619253	0.562230249025362	1.4908688453825645	0.9995467300026422
TSL1	apj1dydj14x	1.669863189146586	0.0028857845413713377	0.5604227065117826	2.979649414172118	0.06921947738552978
MKS1	apj1d	-0.09618589794797347	0.5508350373192488	0.161247941309401	-0.5965093083787835	0.9997008385809374
MKS1	sis14xcga	-0.006264220769693307	0.9733275748918832	0.18735431560638993	-0.03343515600064277	0.9994389642405372
MKS1	ydj14xcga	0.25778043557919267	0.1042625917047016	0.158679940016922	1.624530709752615	NA
MKS1	apj1dsis14x	-0.08280620284406653	0.6235623516744244	0.1687140934756553	-0.4908078580644189	0.9995467300026422
MKS1	apj1dydj14x	-0.011268694701719324	0.9440705602682381	0.16062645681589516	-0.07015466147419996	0.9958293089450293
HSP78	apj1d	0.8678377715626908	8.139582520326501e-4	0.2592104912487924	3.3480040386549508	0.23604789308946852
HSP78	sis14xcga	1.8961944280127285	4.36171350372999e-11	0.2876840690099712	6.591238905019124	5.2096306088551005e-8
HSP78	ydj14xcga	0.5438738134849325	0.0363528623727601	0.25985886598154184	2.0929584658603284	0.24905097637984092
HSP78	apj1dsis14x	2.3487346384201495	9.115967198499397e-20	0.2581308142010362	9.099009142670273	9.231317077604407e-17
HSP78	apj1dydj14x	2.755279495350238	1.0796362500551917e-26	0.2576344217263163	10.694531720133101	9.495400819235412e-24
YKR011C	apj1d	0.3093611142788603	0.2739028919630486	0.2827491157423839	1.0941187683880254	0.9997008385809374
YKR011C	sis14xcga	0.5800597311004335	0.06625305762730646	0.3158149391061743	1.8367077021186207	0.9792828732932796
YKR011C	ydj14xcga	0.43874679482921775	0.12067853852034954	0.2827100968843883	1.5519318187232598	0.48752565794277936
YKR011C	apj1dsis14x	0.3933953846462781	0.16675454383349056	0.28451090282596947	1.382707589546793	0.9995467300026422
YKR011C	apj1dydj14x	0.5412639350100245	0.05495673027502834	0.28202314173326826	1.9192181594868583	0.3929629616007108
UTP21	apj1d	0.05045597813904025	0.7271126083813404	0.14458586029073417	0.3489689658282148	0.9997008385809374
UTP21	sis14xcga	-0.16946537385562094	0.29894182179675605	0.16315058377286668	-1.0387052864704764	0.9792828732932796
UTP21	ydj14xcga	-0.22734580745028551	0.1176882733573452	0.14531059510280092	-1.5645507974793458	0.48221070768366486
UTP21	apj1dsis14x	-0.039959470519004274	0.7840621234708662	0.14582190305442222	-0.274029276000403	0.9995467300026422
UTP21	apj1dydj14x	-0.08642867602625356	0.5506347503668152	0.1448179262448632	-0.5968092367247197	0.9085989923970244
YMR173W-A	apj1d	0.19807408536564156	0.3876331077094344	0.2292742554383825	0.8639176910068475	0.9997008385809374
YMR173W-A	sis14xcga	0.2676184596628065	0.2966741001089599	0.2564396877916727	1.0435922066798617	0.9792828732932796
YMR173W-A	ydj14xcga	-0.35491749658597627	0.1221877162014146	0.22962259486846054	-1.5456558044267856	0.4900838217096738
YMR173W-A	apj1dsis14x	0.1946396997707827	0.396463507613601	0.2295403596212587	0.8479541466778998	0.9995467300026422
YMR173W-A	apj1dydj14x	0.5564792791816392	0.015164932803577945	0.22915318172616414	2.4284161144514527	0.19666548429715178
VBA1	apj1d	-0.09658209590201562	0.7583404778526445	0.31392399371961177	-0.3076607644979188	0.9997008385809374
VBA1	sis14xcga	-0.5506846626981299	0.12508101489330284	0.3590349473232441	-1.5337912557084337	0.9792828732932796
VBA1	ydj14xcga	-0.06019419137869876	0.8476644985858697	0.31334951000948813	-0.19209920378326456	0.9814460160950513
VBA1	apj1dsis14x	-0.2992726296941981	0.3463530016326981	0.31780483843021834	-0.9416868263316595	0.9995467300026422
VBA1	apj1dydj14x	-0.11788331482380636	0.7067899551915604	0.31337713820333146	-0.37617075546627465	0.9519163996422189
YBR056W-A	apj1d	-1.3237020148427452	0.013322297865027682	0.5348214522741622	-2.4750353771601965	NA
YBR056W-A	sis14xcga	-0.6594874980937396	0.26916636346344497	0.5968297093399337	-1.1049843661822776	0.9792828732932796
YBR056W-A	ydj14xcga	0.3730915462841162	0.4581204639397435	0.5028558502872679	0.7419453230403488	NA
YBR056W-A	apj1dsis14x	-0.8012170296589137	0.13539687999590233	0.5365937000303245	-1.493154000156235	NA
YBR056W-A	apj1dydj14x	-0.6440340138997662	0.21332135180617295	0.5175107332101085	-1.2444843605558407	0.6981865894233799
SPB1	apj1d	2.162521575657927e-4	0.9990897943064915	0.1895661844007125	0.0011407739109664747	0.9997008385809374
SPB1	sis14xcga	-0.17941640717497706	0.3987128192963176	0.2125982506143076	-0.843922311950118	0.9792828732932796
SPB1	ydj14xcga	-0.12811346374164315	0.49962988947798476	0.18977742249798954	-0.6750722085658022	0.8674057210297228
SPB1	apj1dsis14x	-0.0181385737866745	0.9239792199807191	0.1900869056043164	-0.09542253175729859	0.9995467300026422
SPB1	apj1dydj14x	-0.1179457600157425	0.5340163152495321	0.1896579294878163	-0.6218867849831683	0.9035015475391345
SRX1	apj1d	-0.4918299430179919	0.0569209631253275	0.2583252738341918	-1.9039172424672508	0.9997008385809374
SRX1	sis14xcga	0.20813726912621755	0.46354166707276473	0.2839419719726278	0.7330274833277628	0.9792828732932796
SRX1	ydj14xcga	-0.05658172489396194	0.8214120394356327	0.2506619561272206	-0.2257292082458837	NA
SRX1	apj1dsis14x	-0.07094339622963564	0.7862939782786951	0.2616619072458838	-0.27112619095514773	NA
SRX1	apj1dydj14x	-0.2460962065132674	0.3310288965182291	0.25317406116953806	-0.9720435236391339	0.8113513641090083
IZH1	apj1d	0.030961697772304283	0.9134367688166984	0.28482409220760657	0.10870463075060549	0.9997008385809374
IZH1	sis14xcga	-0.5228388804837586	0.10780118277638788	0.32511716936799406	-1.6081552429240271	0.9792828732932796
IZH1	ydj14xcga	-0.7943894483256708	0.0060321772167158715	0.28928681549470486	-2.7460271459907286	0.08640898013035851
IZH1	apj1dsis14x	-0.26865694310675525	0.351678431388968	0.2884632267884927	-0.9313386184358958	0.9995467300026422
IZH1	apj1dydj14x	-0.1197527404741322	0.6744253914900211	0.2850697672681137	-0.4200822192467095	0.9430161078147433
SNC1	apj1d	0.08092828311167513	0.6635228884318092	0.18601873593360743	0.435054472902985	0.9997008385809374
SNC1	sis14xcga	0.12255607152287096	0.5651712233183307	0.21307519949961015	0.5751775514498354	0.9838668840705705
SNC1	ydj14xcga	0.11917756404604479	0.5232424910545337	0.18669475126263457	0.6383551933840425	0.8787528010520053
SNC1	apj1dsis14x	0.10611841110859549	0.5795724813080994	0.19154626317085463	0.5540092996433996	0.9995467300026422
SNC1	apj1dydj14x	0.37619666158187876	0.04069037532432173	0.1838090334315256	2.046671235676909	0.33843874290076315
CSM3	apj1d	0.11368302899048396	0.5835457990751715	0.20737025930927108	0.5482127927560606	0.9997008385809374
CSM3	sis14xcga	0.21434257094834602	0.3633899920780551	0.23582000068163858	0.9089244776897126	0.9792828732932796
CSM3	ydj14xcga	0.2935723706891904	0.15558672033361062	0.20673062372480908	1.420072001910957	NA
CSM3	apj1dsis14x	-0.023959447409207715	0.9113148905346653	0.21511413667100848	-0.11138016208507413	0.9995467300026422
CSM3	apj1dydj14x	0.08756952371529395	0.6733392648429123	0.20772262117971005	0.4215695104267612	0.9429519814230984
STP4	apj1d	0.8200842803786104	0.19765524447524338	0.6365825717603547	1.2882606542475938	NA
STP4	sis14xcga	1.7185718582314555	0.011885328027849975	0.6831845726976756	2.5155308344352236	0.7972232508650235
STP4	ydj14xcga	1.500848612481085	0.01599639165748667	0.6230178265111846	2.4089978626865842	NA
STP4	apj1dsis14x	0.955940557884987	0.14142526684469264	0.6500767564804033	1.4705041340972849	NA
STP4	apj1dydj14x	1.3590845145419659	0.029393756590473687	0.6239584832690775	2.178164975690972	0.28304900278819284
RPL8B	apj1d	0.024339969460724878	0.8490972229465775	0.12792302682805273	0.19027043108854325	0.9997008385809374
RPL8B	sis14xcga	-0.11161395559071452	0.435417832881228	0.14310321724051772	-0.7799542018899667	0.9792828732932796
RPL8B	ydj14xcga	0.014985253661703855	0.906760972384365	0.12794236391236996	0.11712503351874541	0.990764062766344
RPL8B	apj1dsis14x	-0.06680904134488141	0.6017374422489448	0.1280103061477784	-0.5219036135087072	0.9995467300026422
RPL8B	apj1dydj14x	-0.1860747506012979	0.14586666612904398	0.12794909837704604	-1.454287313951714	0.6099353384809549
YNL097W-A	apj1d	-0.02040043804363261	0.9908751907454666	1.7838005459787076	-0.011436501737608573	NA
YNL097W-A	sis14xcga	-0.34902218344003977	0.8640157586965194	2.0379126717737823	-0.17126454350777148	0.9907292550326111
YNL097W-A	ydj14xcga	1.8749610790465585	0.28070224356897827	1.7380977823566743	1.078743151322771	NA
YNL097W-A	apj1dsis14x	-0.6060135818110313	0.741244240704483	1.8352586110223434	-0.33020609638956944	NA
YNL097W-A	apj1dydj14x	0.7556277216011081	0.6669135776330212	1.7556904349334475	0.43038778737195293	NA
DPB4	apj1d	0.1311327971947174	0.2865528151549164	0.12304685995510282	1.0657142916330002	0.9997008385809374
DPB4	sis14xcga	0.18980969980229317	0.17961232882355221	0.14144323740246414	1.3419496279076712	0.9792828732932796
DPB4	ydj14xcga	-0.102969562517041	0.4124865872079617	0.12564532358623198	-0.8195256264063953	0.8095599745380458
DPB4	apj1dsis14x	0.10292344996435586	0.4210088176677448	0.12790728852832636	0.8046722837187064	0.9995467300026422
DPB4	apj1dydj14x	-0.028449728660971466	0.8190694117607197	0.12437472231674133	-0.22874204766881331	0.9711255389747546
DPL1	apj1d	0.250178082401005	0.48393209618251476	0.3574011780978593	0.6999923272007352	0.9997008385809374
DPL1	sis14xcga	-0.03223380262906866	0.9359734806055933	0.4012590263207712	-0.0803316573950428	0.9979193919883358
DPL1	ydj14xcga	0.1162791407966207	0.7449897885299649	0.3575039439099256	0.3252527497316719	0.9478792953372275
DPL1	apj1dsis14x	0.048904031650772534	0.8915680430169202	0.35874346232928295	0.1363203424899896	0.9995467300026422
DPL1	apj1dydj14x	0.07265786215171939	0.8389360734621137	0.357472244314639	0.20325455558381084	0.9754035258951463
ATH1	apj1d	0.2627972215386981	0.4481052947467623	0.34643421066284774	0.7585775695647283	0.9997008385809374
ATH1	sis14xcga	0.7256489129058137	0.05899063338258074	0.38429438056652215	1.8882631378477894	0.9792828732932796
ATH1	ydj14xcga	0.35342714721351154	0.30774060799169306	0.3465059040180367	1.019974387493018	NA
ATH1	apj1dsis14x	0.0329974012720922	0.9282310700399515	0.36635019541648217	0.09007065284782878	NA
ATH1	apj1dydj14x	0.5294344380360566	0.12162951715617057	0.34201853693545775	1.5479700099879852	0.5620306147400281
SIS2	apj1d	-0.06022575721812107	0.6531639822437969	0.13402232245280715	-0.449371090695195	0.9997008385809374
SIS2	sis14xcga	-0.04679915722884563	0.758974699248367	0.15252596992595574	-0.3068274684734963	0.9872814001744901
SIS2	ydj14xcga	-0.23615720932164816	0.08123752808954568	0.1354461658641625	-1.7435503457402233	0.39293788662727064
SIS2	apj1dsis14x	-0.10339836639966436	0.45093476638411195	0.13715902591733775	-0.7538575438847162	0.9995467300026422
SIS2	apj1dydj14x	-0.0969234090915162	0.4703798112248926	0.13426875911334965	-0.7218612112866366	0.8798674618570241
TRK1	apj1d	0.22975620269586097	0.4419769202656156	0.298827422078007	0.7688591665991235	0.9997008385809374
TRK1	sis14xcga	0.2658487606789386	0.4294484260990767	0.33645955370771297	0.7901358655129319	0.9792828732932796
TRK1	ydj14xcga	0.16464804977734862	0.5826013702692033	0.2995840130649601	0.5495889052719488	NA
TRK1	apj1dsis14x	-0.10625121371294291	0.7284663996039211	0.30605280205634233	-0.3471662830696213	0.9995467300026422
TRK1	apj1dydj14x	0.28119541265362397	0.3456799377052969	0.29819178149582515	0.9430018870508705	0.8237326998915419
QCR10	apj1d	0.2910953105814457	0.2512963366742286	0.2537427584516933	1.1472063768742526	0.9997008385809374
QCR10	sis14xcga	0.12719608261501394	0.6657337251575572	0.29442816708671987	0.43201057790625735	0.9838668840705705
QCR10	ydj14xcga	0.822713858837055	9.876948589347765e-4	0.24976069143062113	3.294008573264979	NA
QCR10	apj1dsis14x	0.5367651989175638	0.03740944205888459	0.2579030509146326	2.081267348385251	0.9995467300026422
QCR10	apj1dydj14x	1.0462439880414303	2.295008829051364e-5	0.2471013311887139	4.2340686025782786	0.0016820502209588955
RPN7	apj1d	-0.013660610145673232	0.8915515607383513	0.10019429830635522	-0.13634119282820262	0.9997008385809374
RPN7	sis14xcga	0.0037730331198645947	0.9733210361418362	0.11281861648860796	0.03344335569161658	0.9994389642405372
RPN7	ydj14xcga	0.12397005321119266	0.21584505141409926	0.10016550171074619	1.2376521965535427	0.625969566283308
RPN7	apj1dsis14x	0.08685282202428307	0.3897458710461883	0.10098245705299487	0.8600783201254781	0.9995467300026422
RPN7	apj1dydj14x	-0.0032882116682491093	0.9738156080340994	0.10017961487552984	-0.03282316140199394	0.997249168173092
THI3	apj1d	0.11873645529034887	0.6009813086916518	0.22703395239640453	0.5229898613711896	0.9997008385809374
THI3	sis14xcga	0.170274674677567	0.5165596548905165	0.2625031293586127	0.6486576944572349	0.9816226614664663
THI3	ydj14xcga	0.0064974941514475875	0.9774934960795975	0.23031398784076046	0.028211461285364777	NA
THI3	apj1dsis14x	0.24546236025887375	0.2945029280960614	0.23415400228440467	1.0482945320777985	0.9995467300026422
THI3	apj1dydj14x	0.15402774496929583	0.4972482344314089	0.22690319282586546	0.6788258157632134	0.8885807426666253
SHH4	apj1d	-0.5500698448267535	0.49387794948118574	0.804014702528021	-0.6841539627287883	NA
SHH4	sis14xcga	0.5131111141515222	0.5499862079815976	0.8583599874448684	0.5977807932065086	0.9833885131934433
SHH4	ydj14xcga	0.4401252202676388	0.5622847774845849	0.7595553066145696	0.5794511820730085	NA
SHH4	apj1dsis14x	-0.6041283180159481	0.47761918006328047	0.8507207945755827	-0.7101370060165775	NA
SHH4	apj1dydj14x	0.23656015650682063	0.7565769343874129	0.7631490036724365	0.3099789888585879	NA
NQM1	apj1d	0.07150120672180386	0.9017135558488768	0.5789712395713295	0.12349699231129924	NA
NQM1	sis14xcga	1.4711403525098297	0.016621445643187117	0.6142609571202635	2.3949761668179756	0.8784360476204731
NQM1	ydj14xcga	0.47918820713813476	0.4022434620221153	0.572082208957456	0.8376212363104103	NA
NQM1	apj1dsis14x	0.23477175564656935	0.6925036264663957	0.5936679024261029	0.3954597422012262	NA
NQM1	apj1dydj14x	1.547368504044008	0.0049812959642152035	0.5510099019328294	2.808240829459067	0.10003790991229641
ERB1	apj1d	-0.04763971884794583	0.7464120309304021	0.14732081561658744	-0.32337398247869786	0.9997008385809374
ERB1	sis14xcga	-0.17342719761759764	0.29429952733155806	0.1653677922563195	-1.048736245742376	0.9792828732932796
ERB1	ydj14xcga	-0.16149877020731518	0.2737171386824204	0.14754911487980987	-1.0945424534662127	0.6967153937693302
ERB1	apj1dsis14x	-0.11122084879607926	0.4522396893339462	0.14796177411094258	-0.7516863694313723	0.9995467300026422
ERB1	apj1dydj14x	-0.22545464343260455	0.12635076312988433	0.1474859278618646	-1.5286518971746612	0.5752829827751507
SKO1	apj1d	-0.16299503822510344	0.3162974856832502	0.1626542012654531	-1.002095469757305	0.9997008385809374
SKO1	sis14xcga	-0.10859516507589137	0.5665607402292218	0.18947935463043494	-0.57312399700589	0.9838668840705705
SKO1	ydj14xcga	0.03261763521660076	0.8401749958454166	0.1617379523783126	0.20166964362394418	NA
SKO1	apj1dsis14x	-0.17949738073445398	0.2918752965331137	0.1702984308418174	-1.054016645057529	0.9995467300026422
SKO1	apj1dydj14x	-0.014918422300489516	0.9263463530842924	0.16138029336569668	-0.09244265200760012	0.9919500213526402
HST1	apj1d	0.02916165541584785	0.8867821176720028	0.2048197857806911	0.14237714049302067	0.9997008385809374
HST1	sis14xcga	0.0810918612638565	0.7283315109980963	0.23346143864856883	0.34734584749100533	0.9872814001744901
HST1	ydj14xcga	-0.3872415979991428	0.0650313223734073	0.20988218361712987	-1.8450427345731955	NA
HST1	apj1dsis14x	-0.15163564993929196	0.47528523411344475	0.21240278820757338	-0.7139061178006009	0.9995467300026422
HST1	apj1dydj14x	0.03268313678359746	0.8732922858854968	0.2049382092128396	0.15947800514668412	0.9798000556687592
YML122C	apj1d	0.06737065849019575	0.9616267828559725	1.4002807495289722	0.048112250713193014	NA
YML122C	sis14xcga	-1.1542080339761591	0.5357440614335401	1.863845752646996	-0.6192615630005736	0.9816226614664663
YML122C	ydj14xcga	-0.34137818172002315	0.8146404826009861	1.4561196627214053	-0.23444376891525978	NA
YML122C	apj1dsis14x	-1.7740360327576383	0.2899217681417789	1.6763180038727417	-1.058293252628166	NA
YML122C	apj1dydj14x	-0.17007045146021668	0.9051507156634458	1.4272765178696092	-0.11915732468860929	NA
SYT1	apj1d	-0.17603885713250828	0.2505897841586516	0.15322142505883563	-1.1489180254322198	0.9997008385809374
SYT1	sis14xcga	-0.1288425832536749	0.47483025887011443	0.18028967728136452	-0.7146420427199499	0.9792828732932796
SYT1	ydj14xcga	-0.23143774834138986	0.13599936228765172	0.15523818660034153	-1.4908557836817755	NA
SYT1	apj1dsis14x	-0.1270708747930271	0.4288476682650543	0.16061234075108757	-0.7911650761005837	0.9995467300026422
SYT1	apj1dydj14x	0.007670021217886287	0.9596242336229475	0.15150618777023947	0.05062513505730832	0.9958293089450293
QRI1	apj1d	0.11291142044479827	0.20547283382604212	0.08917961625148126	1.266112427826497	0.9997008385809374
QRI1	sis14xcga	0.1388692844028466	0.17301425885819524	0.10191627071989288	1.362582082546128	0.9792828732932796
QRI1	ydj14xcga	0.3721010242111618	2.733903207875594e-5	0.0887101821283512	4.194569499054616	0.0017357789059684924
QRI1	apj1dsis14x	0.11907329520926165	0.19399408070660634	0.09167566674090726	1.2988538773956808	0.9995467300026422
QRI1	apj1dydj14x	0.28139207214877154	0.0015042121510654277	0.08865898762923854	3.1738696738284458	0.04498752095048082
GRH1	apj1d	0.029878276193951895	0.8195377364555192	0.13096489932230773	0.22813957288220219	0.9997008385809374
GRH1	sis14xcga	0.052902537719345395	0.7217236729695501	0.14853750659140155	0.35615609103275325	0.9872814001744901
GRH1	ydj14xcga	0.31093169966775913	0.017127172980788145	0.13042621702577792	2.3839662512507394	0.15699117837514673
GRH1	apj1dsis14x	-0.038725771792456884	0.7723210955863629	0.13384168325416199	-0.2893401431519478	0.9995467300026422
GRH1	apj1dydj14x	0.10629558500389905	0.4161969633234368	0.1307389602319839	0.8130367934339359	0.8660942520883554
SUI2	apj1d	-0.03491276810233594	0.796296869321218	0.1352460638001207	-0.25814258190858186	0.9997008385809374
SUI2	sis14xcga	-0.14120911308322945	0.3523712981098941	0.1518378233644176	-0.9299995874171697	0.9792828732932796
SUI2	ydj14xcga	-0.051316219769777176	0.7046956300980652	0.13540273312678236	-0.37898954167880783	0.935729470302768
SUI2	apj1dsis14x	-0.018429911715364233	0.8920468974226233	0.13579902492563894	-0.13571461006775354	0.9995467300026422
SUI2	apj1dydj14x	-0.2585909318670214	0.056271056750284536	0.1354637744548055	-1.9089305086009882	0.39621368971363236
PDR18	apj1d	-0.38615980524906374	0.5800972922410648	0.6979936058961528	-0.5532426113750337	NA
PDR18	sis14xcga	0.5396916015650567	0.4820982964668908	0.7677724295065782	0.7029317292780343	0.9803744333627407
PDR18	ydj14xcga	0.47082736071083525	0.49208982168639576	0.6853494543331069	0.6869887438211844	NA
PDR18	apj1dsis14x	-0.10217570294018198	0.8850508514642927	0.7067588059664786	-0.1445694090793234	NA
PDR18	apj1dydj14x	-0.7474128808267415	0.2917915160234155	0.7089860770326526	-1.054199659258357	0.7805624199495714
MSY1	apj1d	-0.22042088787120176	0.4023391302320939	0.26320453122024684	-0.83745096199258	0.9997008385809374
MSY1	sis14xcga	0.03714770096116402	0.9005005678334722	0.2971126056215792	0.1250290302676609	0.996317062874202
MSY1	ydj14xcga	-0.0559796141192241	0.8309919005779178	0.26228609356684157	-0.21342959269381978	NA
MSY1	apj1dsis14x	0.0775892033230467	0.7704709713930696	0.26593602878336775	0.2917589003566383	0.9995467300026422
MSY1	apj1dydj14x	-0.08029366188442627	0.7589265730563721	0.2616360274274586	-0.30689069343360426	0.9657440551364326
VMA9	apj1d	0.061294545093935386	0.6030865278149591	0.11788159052173885	0.51996706884127	0.9997008385809374
VMA9	sis14xcga	0.016642397379525494	0.9008759223882413	0.1336149382972566	0.12455491572731728	0.9964865731621739
VMA9	ydj14xcga	0.2141643194500588	0.06910696072121227	0.11782031112818078	1.817719860008365	0.3624008447329499
VMA9	apj1dsis14x	0.018517682346388228	0.8772507514326731	0.11989023368482778	0.15445530279862701	0.9995467300026422
VMA9	apj1dydj14x	0.1101461216332273	0.3497117245737243	0.11778461937988802	0.9351485976108269	0.8269279526681248
ENA5	apj1d	-0.05884236979920824	0.866536524288767	0.35012834007652854	-0.1680594315397231	0.9997008385809374
ENA5	sis14xcga	-0.4474353949669015	0.2573912170861842	0.39505898749447993	-1.132578701232948	0.9792828732932796
ENA5	ydj14xcga	-0.06092027305260933	0.8617601501265427	0.3498470813634435	-0.1741340039630671	0.9815368402799278
ENA5	apj1dsis14x	-0.25760579927476035	0.4643238874643133	0.35204286312896516	-0.7317455521897362	0.9995467300026422
ENA5	apj1dydj14x	0.014064654596187144	0.967897473019933	0.3494722437211109	0.04024541247233114	0.9962634954535305
CDC28	apj1d	0.18162877956850318	0.12409995325922184	0.11811025676703575	1.5377900661646455	0.9997008385809374
CDC28	sis14xcga	0.09225344223497409	0.4994859878028094	0.13661130626426485	0.6752987344730924	0.9816226614664663
CDC28	ydj14xcga	0.02498099788319181	0.8347686819546845	0.11976151185904069	0.20858953344371978	0.9780624379239289
CDC28	apj1dsis14x	0.1584545174070555	0.19424290144862194	0.12206373837911051	1.2981293176104522	0.9995467300026422
CDC28	apj1dydj14x	0.14099182413448602	0.23399435691313683	0.11846734359326616	1.1901324015380403	0.7225653212386406
ZAP1	apj1d	0.03992050700644626	0.9088648085135962	0.3487404828765848	0.1144705274167257	0.9997008385809374
ZAP1	sis14xcga	0.3351923750310984	0.39213540780734507	0.3916937203077047	0.8557512098171492	0.9792828732932796
ZAP1	ydj14xcga	-0.2632807739797813	0.45780881885694175	0.35460611512222867	-0.7424597680415957	NA
ZAP1	apj1dsis14x	0.4187276164731606	0.23359267415509066	0.35153070427018973	1.1911551719002125	0.9995467300026422
ZAP1	apj1dydj14x	-0.2842565989277986	0.4208703062442277	0.35315227369455443	-0.8049122718480796	0.8660942520883554
YKL050C	apj1d	-0.25054686925600067	0.782734002221967	0.9085754088056738	-0.2757579247993797	NA
YKL050C	sis14xcga	1.346650203624719	0.16636402954313262	0.9730259528620215	1.3839817937679189	0.9792828732932796
YKL050C	ydj14xcga	-0.024771510447121513	0.9782624254574876	0.9091336449174197	-0.027247380608570054	NA
YKL050C	apj1dsis14x	0.17038440239096797	0.853010865040678	0.9196140538159734	0.18527816281618514	NA
YKL050C	apj1dydj14x	-0.33074261410965317	0.717886445818497	0.915461929264771	-0.3612849464698989	NA
RRN7	apj1d	0.187702838191242	0.5731144429160205	0.33311910648866266	0.5634706461895191	0.9997008385809374
RRN7	sis14xcga	0.4147829070841484	0.2716448913086004	0.3773215087656331	1.099282435398571	0.9792828732932796
RRN7	ydj14xcga	-0.033441080278701255	0.9216661325250737	0.3400723463263834	-0.09833519437833467	NA
RRN7	apj1dsis14x	0.2573337102553719	0.4546002750892366	0.34413588998822325	0.7477677212457502	NA
RRN7	apj1dydj14x	0.22431630788625925	0.5004458773694587	0.33291805236186245	0.6737883581105435	0.8910166295444166
RPN10	apj1d	-0.004911235505823922	0.9639849991929104	0.10876767296486921	-0.045153448372571126	0.9997008385809374
RPN10	sis14xcga	-0.07290915014555993	0.5538854875316018	0.1231681911594758	-0.591947884102305	0.9838668840705705
RPN10	ydj14xcga	0.07740940007365052	0.4771756810866743	0.1088965807854609	0.7108524392162153	0.8493782696484041
RPN10	apj1dsis14x	-0.07564443112845477	0.4934354669321108	0.11045321786717106	-0.6848549330579334	0.9995467300026422
RPN10	apj1dydj14x	0.12100420122347454	0.26495555557367784	0.10854782827179729	1.1147546952343186	0.7488817462445453
SCY1	apj1d	-0.007046841510952463	0.9910084298926057	0.6253020291904748	-0.011269500468558222	0.9997008385809374
SCY1	sis14xcga	1.925251116640767	0.005666756012783984	0.695924469260136	2.7664656175799878	0.654463138215759
SCY1	ydj14xcga	0.007475719340644875	0.9904708955843595	0.6259370222334688	0.011943245206953902	0.9991948062534504
SCY1	apj1dsis14x	1.4638911963154744	0.01899244516993317	0.624079875202382	2.3456792222962664	0.9995467300026422
SCY1	apj1dydj14x	0.024772651929697256	0.9684066082038066	0.6254646575080167	0.03960679733431579	0.9962634954535305
UGO1	apj1d	-0.1653678427705305	0.37935553778201386	0.18811373573857412	-0.8790843588388776	0.9997008385809374
UGO1	sis14xcga	0.27507674272065125	0.19007424507841758	0.20992463601787997	1.3103595077674546	0.9792828732932796
UGO1	ydj14xcga	-0.1777514215491031	0.346833037009258	0.18894652045445667	-0.9407499070190497	0.7711158633862627
UGO1	apj1dsis14x	-0.023403688451801845	0.9027122408568145	0.19146338685360698	-0.12223584277079733	0.9995467300026422
UGO1	apj1dydj14x	0.0539046361498175	0.7726498607397762	0.18657900729929333	0.28891050997687273	0.9665870595653628
COX19	apj1d	-0.5268530996318802	0.04565884672259788	0.2636198428862951	-1.9985335468814587	0.9997008385809374
COX19	sis14xcga	-0.16557701067664438	0.5815574686768492	0.3004421243260959	-0.5511111700732394	0.9838668840705705
COX19	ydj14xcga	-0.008350512101551166	0.9740127991999665	0.2563402851610723	-0.03257588676046019	NA
COX19	apj1dsis14x	-0.6094725436781582	0.02943907343097576	0.2798882841778944	-2.1775564685329347	NA
COX19	apj1dydj14x	-0.1877048462523153	0.466617075326689	0.25783834593790006	-0.727994300341671	0.8778060958687229
RRP4	apj1d	0.11105769597493964	0.3456391961053254	0.11776043854365639	0.9430815420559775	0.9997008385809374
RRP4	sis14xcga	0.02225760164850964	0.8694941036114014	0.13546835385242167	0.16430111546757942	0.9907292550326111
RRP4	ydj14xcga	0.07005071555470208	0.554678006691423	0.11857631437936589	0.5907648245043783	0.8955143632358608
RRP4	apj1dsis14x	0.0085648199695546	0.943867765760465	0.12164303706542563	0.0704094552074363	0.9995467300026422
RRP4	apj1dydj14x	0.07304176989787128	0.5360682443842222	0.11804359248948125	0.6187694592942854	0.903540005483757
CRN1	apj1d	0.028901781082845492	0.6108005480022363	0.056789186923543254	0.5089310597412973	0.9997008385809374
CRN1	sis14xcga	-0.03475154637735411	0.597174443881279	0.0657590169461958	-0.528468155261322	0.9838668840705705
CRN1	ydj14xcga	-0.022423684702135592	0.6954185624234963	0.05727452723592997	-0.39151234910706634	0.93128871290259
CRN1	apj1dsis14x	0.01794105012078245	0.7598788550827132	0.0586999651486059	0.30563987687833477	0.9995467300026422
CRN1	apj1dydj14x	-0.05640022684383112	0.32324069037925846	0.05709563767905872	-0.9878202457578882	0.8071259288381687
UGA3	apj1d	-0.02867646900389927	0.9013554806480346	0.23135658912140677	-0.12394922103926331	0.9997008385809374
UGA3	sis14xcga	0.0018483587863906705	0.9945080721121191	0.26853325887641	0.006883165214337047	0.9994389642405372
UGA3	ydj14xcga	0.1689734549126227	0.46268687508830353	0.23007436771346704	0.7344297263181486	NA
UGA3	apj1dsis14x	-0.08158278734449505	0.7360842460751768	0.2420543092373556	-0.3370433172685057	0.9995467300026422
UGA3	apj1dydj14x	0.11602274705876546	0.6134682486357255	0.22968935033103843	0.505128979169249	0.932270503087439
SFM1	apj1d	-0.01867349844189994	0.8611541684167799	0.10676357502561619	-0.17490514379477773	0.9997008385809374
SFM1	sis14xcga	-0.1502349857787976	0.21526894821782924	0.12123480443518811	-1.2392067317526207	0.9792828732932796
SFM1	ydj14xcga	0.04601232756557755	0.6668640346277546	0.10689208076382382	0.43045590689960445	0.9248165943166299
SFM1	apj1dsis14x	-0.18557645105363807	0.08798896144009861	0.10877214596334321	-1.706102692100773	0.9995467300026422
SFM1	apj1dydj14x	-0.1886016742537823	0.0784528625364432	0.10717622044666462	-1.7597343278926167	0.463601070106171
YLR365W	apj1d	-0.6401144921163673	0.6155721487094834	1.2747841586743094	-0.5021355872370141	NA
YLR365W	sis14xcga	0.7533926966140051	0.5699865364186847	1.3262290505675842	0.5680713269639033	0.9838668840705705
YLR365W	ydj14xcga	-0.4483074778422495	0.7231724918228477	1.2656114936783296	-0.3542220342352487	NA
YLR365W	apj1dsis14x	-1.02572255446997	0.4675006922257086	1.4117683683635172	-0.726551591220987	NA
YLR365W	apj1dydj14x	-0.41304686339158336	0.7418455475001142	1.25389765756789	-0.32941034772546396	NA
PEX6	apj1d	-0.16576500307649972	0.3711868539692253	0.18536712945577855	-0.8942524144554165	0.9997008385809374
PEX6	sis14xcga	0.08085133100616629	0.7017135176442701	0.21109543766509337	0.3830084245327857	0.9854540024253493
PEX6	ydj14xcga	0.11607279883657294	0.5270694865793252	0.18351842751480418	0.6324857967040367	NA
PEX6	apj1dsis14x	-0.1257879889232124	0.5132097594441292	0.1923810965568744	-0.653847967261301	0.9995467300026422
PEX6	apj1dydj14x	0.15450795876807835	0.39664121094085336	0.18228121476001122	0.8476351168248537	0.8550145711335307
COX16	apj1d	-0.2734851808181166	0.1577300723281005	0.19358395024732963	-1.412747185232569	0.9997008385809374
COX16	sis14xcga	-0.06896505649138741	0.7574246163177631	0.2232858118373853	-0.3088644814638438	0.9872814001744901
COX16	ydj14xcga	-0.06875555130866334	0.7205894471525531	0.1922312068671741	-0.3576711212980696	NA
COX16	apj1dsis14x	-0.04910375381776835	0.8052104936908278	0.19911546242748374	-0.2466094456910977	0.9995467300026422
COX16	apj1dydj14x	0.03873342018251211	0.8383439405568538	0.18985832317156986	0.20401223151807654	0.9754035258951463
TAM41	apj1d	-0.05847609904297573	0.7259480850631153	0.16682645931841722	-0.35052053062736266	0.9997008385809374
TAM41	sis14xcga	-0.17466196619386412	0.38157218591803604	0.19961295459375125	-0.8750031607384052	0.9792828732932796
TAM41	ydj14xcga	-0.013832246721097403	0.9342124545364425	0.16756994433629244	-0.08254610799021196	NA
TAM41	apj1dsis14x	0.049041987932684175	0.7774886565569225	0.1735426739046131	0.282593248272986	0.9995467300026422
TAM41	apj1dydj14x	0.19251364947933286	0.24096107738466457	0.1641784283984346	1.1725879663809013	0.7291447584137678
IST1	apj1d	0.0028382942090064527	0.9860877727709363	0.16277166358214465	0.017437274686168416	0.9997008385809374
IST1	sis14xcga	0.03474975333944016	0.8519573743763577	0.18620440450542797	0.18662154330740968	0.9907292550326111
IST1	ydj14xcga	0.08936209873881708	0.5837898334338063	0.16311197316329498	0.5478573829117664	0.9046168927967994
IST1	apj1dsis14x	-0.020983344942912246	0.9003980514999791	0.16765414099354164	-0.1251585246780189	0.9995467300026422
IST1	apj1dydj14x	0.1678390880867853	0.29986538461973355	0.16189399882410252	1.0367221101823676	0.7876503905616397
HED1	apj1d	0.1943137157951755	0.8419079686563714	0.9742303803309181	0.19945355812982624	NA
HED1	sis14xcga	1.2747188560141531	0.2265732289247896	1.054154611273355	1.2092332968826742	0.9792828732932796
HED1	ydj14xcga	1.7908624652200724	0.05635624228164592	0.9384740314523827	1.9082706662096265	NA
HED1	apj1dsis14x	-0.033094161245284394	0.9739309778354337	1.0127200499262332	-0.03267848923075531	NA
HED1	apj1dydj14x	0.3992827261720936	0.6798292824460443	0.9674981809017782	0.4126961001621039	NA
EGT2	apj1d	0.018343469736459183	0.954441814627212	0.32108420389774806	0.05712977939674919	0.9997008385809374
EGT2	sis14xcga	-0.4895059740850725	0.17389751879915064	0.35998739535024527	-1.3597864269909055	0.9792828732932796
EGT2	ydj14xcga	-0.00805850548051061	0.9799742555679676	0.3210408478321997	-0.025101184272733404	0.9971509260991405
EGT2	apj1dsis14x	-0.15693627889994086	0.6254618436570395	0.32150888360360835	-0.4881242382510003	0.9995467300026422
EGT2	apj1dydj14x	0.14980495193400245	0.6406155414611865	0.32089256262594834	0.4668383421170908	0.9397423432890535
RTT106	apj1d	-1.039022492122423e-4	0.999418820112654	0.1426442913000083	-7.284010335451556e-4	0.9997008385809374
RTT106	sis14xcga	-0.1011991095876851	0.5372742702744913	0.16403394450772066	-0.6169400479357607	0.9816226614664663
RTT106	ydj14xcga	-0.2622447938219846	0.07034886407664184	0.14491402064395945	-1.8096578416404319	0.36548095642164874
RTT106	apj1dsis14x	-0.11323320350024203	0.4413902803656681	0.14708521350825315	-0.7698476332149347	0.9995467300026422
RTT106	apj1dydj14x	-0.18993578951295542	0.18659834813080392	0.14381348349186338	-1.3207091915251572	0.6715973197522583
KSH1	apj1d	0.11548354764079374	0.39478864406486547	0.13570888421052227	0.8509652725583287	0.9997008385809374
KSH1	sis14xcga	0.07808178539913739	0.620208144727616	0.1575641987280469	0.4955553738061094	0.9838668840705705
KSH1	ydj14xcga	0.18529123745752163	0.1729157017715945	0.1359541852501888	1.3628946921828162	0.5814839161537442
KSH1	apj1dsis14x	0.03350788069293353	0.8131180491979012	0.1417390222633942	0.23640547365047926	0.9995467300026422
KSH1	apj1dydj14x	0.09872343628951989	0.46789343917596515	0.13599939926766416	0.7259108262325452	0.8778060958687229
GSF2	apj1d	0.012469530418095476	0.9539687051630931	0.21602093541113832	0.05772371272424613	0.9997008385809374
GSF2	sis14xcga	-0.17192996069790353	0.4774981120360454	0.2420416016182643	-0.7103322715946274	0.9792828732932796
GSF2	ydj14xcga	-0.11963410888884998	0.5798985928643317	0.21612829101889108	-0.5535328499793354	0.9040838004017948
GSF2	apj1dsis14x	-0.20812218833661533	0.33662509561313664	0.21660104301332916	-0.9608549683844687	0.9995467300026422
GSF2	apj1dydj14x	-0.14373415931384428	0.5059209838182612	0.21607579651115066	-0.6652024966916035	0.8952867309218526
ARO10	apj1d	-0.11248535841744126	0.8094839933163328	0.46656656779463834	-0.24109176735301843	0.9997008385809374
ARO10	sis14xcga	-0.016531058817862154	0.9748671571486871	0.5247195910215772	-0.031504558054860916	0.9994389642405372
ARO10	ydj14xcga	-0.8521997568250115	0.07205373146936365	0.47376582184779464	-1.7987784629571595	NA
ARO10	apj1dsis14x	1.4115979778944439	0.002304244133651513	0.46313349439209617	3.0479289340696285	0.3640705731169391
ARO10	apj1dydj14x	-0.009270027940429117	0.9841428444481546	0.4664093261772141	-0.01987530570284294	0.9989078265345089
PFA3	apj1d	0.021216969193066336	0.9638008873675041	0.4674944008376316	0.045384434883179135	0.9997008385809374
PFA3	sis14xcga	-0.7468547864216555	0.1705252869552837	0.5449434686213487	-1.3705179150254279	0.9792828732932796
PFA3	ydj14xcga	0.08593394938665884	0.8539269690540447	0.4667526737080753	0.1841102455910197	NA
PFA3	apj1dsis14x	-0.24714530207791488	0.6035385769360235	0.47590303275884815	-0.519318611283466	0.9995467300026422
PFA3	apj1dydj14x	-0.03561512336682888	0.9392446178539848	0.46727163994282206	-0.0762193129700466	0.9958293089450293
EUG1	apj1d	0.141726595923578	0.7029914829858617	0.37170737302348195	0.38128540408216405	0.9997008385809374
EUG1	sis14xcga	-0.1517585350538604	0.7165686633884037	0.41801175312413397	-0.3630484882772991	0.9872814001744901
EUG1	ydj14xcga	0.260862689637157	0.4820060130474138	0.3710285597030453	0.7030798110149251	0.8504228406928822
EUG1	apj1dsis14x	-0.005403032849484736	0.988446714827549	0.37312727731454615	-0.014480401669830164	0.9995467300026422
EUG1	apj1dydj14x	0.06141650272625308	0.8686732481872939	0.37144687479923055	0.16534397485360214	0.9794847715137499
POM152	apj1d	-0.05505859096564084	0.8697565315283666	0.3357891463049569	-0.1639677505110238	0.9997008385809374
POM152	sis14xcga	-0.43719803260086476	0.2469138301395345	0.3775855797029623	-1.157877991380916	0.9792828732932796
POM152	ydj14xcga	-0.25758177095198986	0.443299937910802	0.33599111637903617	-0.7666326828159598	0.8274857991362001
POM152	apj1dsis14x	-0.34392382630395957	0.3077517472048675	0.3371964532427034	-1.0199509010150056	0.9995467300026422
POM152	apj1dydj14x	-0.020866738282328927	0.9503958128224418	0.3354256279921973	-0.06220973157964642	0.9958293089450293
SRN2	apj1d	-0.14357836035229643	0.5758646223642077	0.2566486960869285	-0.5594353781702658	0.9997008385809374
SRN2	sis14xcga	-0.2684213200797547	0.37343715229862345	0.3015788555810677	-0.8900535137404557	0.9792828732932796
SRN2	ydj14xcga	-0.13657204065337017	0.5970318790990143	0.2583295914794872	-0.5286736214430732	NA
SRN2	apj1dsis14x	-0.36528482966092074	0.17803743688682658	0.2712197452369832	-1.34682240535897	0.9995467300026422
SRN2	apj1dydj14x	-0.06558192991954265	0.7977600853557161	0.2559324353278663	-0.2562470436212115	0.9694495315065704
ATP22	apj1d	0.07460924764453702	0.7879183576143438	0.2773426246945246	0.2690147168208075	0.9997008385809374
ATP22	sis14xcga	0.6001090150689011	0.05079737172406962	0.3072459705976064	1.953187584207089	0.9792828732932796
ATP22	ydj14xcga	0.09695743166028019	0.7278912071603043	0.27866771342387764	0.34793206026275303	NA
ATP22	apj1dsis14x	0.15391028051212427	0.5910795921809113	0.28646610608312134	0.5372722190996846	0.9995467300026422
ATP22	apj1dydj14x	0.0703115039847927	0.8001809876016619	0.2777871459133714	0.25311287804051064	0.9694495315065704
RPN3	apj1d	0.04244477725381151	0.7439377536331495	0.12994232007190726	0.32664321546916736	0.9997008385809374
RPN3	sis14xcga	0.0011453130678221015	0.9937385946156185	0.1459445888685541	0.007847588435455011	0.9994389642405372
RPN3	ydj14xcga	0.041225283664685905	0.7513620716728362	0.13011229536169663	0.3168438735946095	0.9485595420305095
RPN3	apj1dsis14x	-0.05608418487698682	0.6682317226063064	0.13086166369052918	-0.42857612608088663	0.9995467300026422
RPN3	apj1dydj14x	0.20892100336289435	0.10745137650381713	0.12978435694862075	1.6097548909195762	0.5296656678077583
SPT15	apj1d	-0.039026427008821106	0.8334417035558512	0.18558425767320785	-0.21028953370356485	0.9997008385809374
SPT15	sis14xcga	-0.141671354093787	0.4977458353145551	0.2089422312967308	-0.6780407829214354	0.9816226614664663
SPT15	ydj14xcga	-0.22326108711284698	0.23065766611958344	0.18625789180606203	-1.1986664562128402	0.6503649245015138
SPT15	apj1dsis14x	-0.02320649670906125	0.901142820478942	0.18682100867749651	-0.12421781079836651	0.9995467300026422
SPT15	apj1dydj14x	-0.1909057167503131	0.30446626925961706	0.18590438159110959	-1.0269027287920722	0.7914662675599107
RPC37	apj1d	-0.1441805324328036	0.1949548997999367	0.11124528185825848	-1.296059752147593	0.9997008385809374
RPC37	sis14xcga	-0.19171279614009049	0.13481052621197037	0.12820182906974634	-1.4953982913597272	0.9792828732932796
RPC37	ydj14xcga	-0.3498496888140726	0.001954640295772477	0.11296262885647873	-3.0970391921257745	0.03992533789327856
RPC37	apj1dsis14x	-0.2137364243450268	0.06286891780128641	0.11490480344952558	-1.8601174009136627	0.9995467300026422
RPC37	apj1dydj14x	-0.3781993369128877	7.786856978478307e-4	0.11255054785817736	-3.360262069887469	0.027578016292234917
POP5	apj1d	-0.06862190653789713	0.6895523497739693	0.17178554490504247	-0.39946263567070855	0.9997008385809374
POP5	sis14xcga	-0.042428748659091145	0.8301470159951586	0.19779101971209623	-0.2145130184416373	0.9907292550326111
POP5	ydj14xcga	-0.26948177921522243	0.12319402759950031	0.1748173710436175	-1.5415045862232184	0.49292507536486885
POP5	apj1dsis14x	-0.4513829499731401	0.013472606696114981	0.18267026378605952	-2.4710258835657704	0.9995467300026422
POP5	apj1dydj14x	-0.34209087941087174	0.05004028726488638	0.1745700579086147	-1.959619441668239	0.37349730678473186
ARO80	apj1d	-0.14307372447011618	0.48792323383063896	0.2062723215900199	-0.693615718130544	0.9997008385809374
ARO80	sis14xcga	-0.2157195078306869	0.3735217538495794	0.2424098071152607	-0.8898959592345077	0.9792828732932796
ARO80	ydj14xcga	-0.14317727463272534	0.49068997339582604	0.20774059357836827	-0.6892118298425531	NA
ARO80	apj1dsis14x	-0.14683566497663325	0.494540431224006	0.21495325443917335	-0.6831051028268299	0.9995467300026422
ARO80	apj1dydj14x	0.022830245708151675	0.9111365760777995	0.2045628568243797	0.11160503946105811	0.9870543461463154
ARG5,6	apj1d	0.18015647741498741	0.5389337549202486	0.29321095002913594	0.6144261576761902	0.9997008385809374
ARG5,6	sis14xcga	0.49281589598675296	0.1320058584174463	0.3271830903545578	1.5062388934975346	0.9792828732932796
ARG5,6	ydj14xcga	0.19727152784951116	0.5012708820515693	0.29334429180850363	0.672491448984086	NA
ARG5,6	apj1dsis14x	0.35701866952774153	0.22719865180652085	0.2956415561822512	1.2076065155997684	0.9995467300026422
ARG5,6	apj1dydj14x	-0.25656193751175577	0.3873804858940629	0.29681696189258816	-0.8643776146613891	0.8475152670244485
OST4	apj1d	0.061614841644174606	0.761807206270682	0.20327654800873218	0.3031084610976757	0.9997008385809374
OST4	sis14xcga	0.12356119256611417	0.5944956181842915	0.2321127420305208	0.5323326564720301	0.9838668840705705
OST4	ydj14xcga	0.4195991445876655	0.0376243892688635	0.20183482447740828	2.078923425004053	0.2546898463398154
OST4	apj1dsis14x	0.17160954559167949	0.4094601021895039	0.20805088404418717	0.8248441066716734	0.9995467300026422
OST4	apj1dydj14x	0.1758502854750334	0.38570646004560016	0.20272562520076012	0.8674299822772185	0.8468216953656741
YMR321C	apj1d	-0.08724813915587033	0.5709622514248585	0.1539759332529287	-0.5666349104866415	0.9997008385809374
YMR321C	sis14xcga	-0.10973013474205094	0.5366151675910749	0.17757421338896615	-0.6179395794461067	0.9816226614664663
YMR321C	ydj14xcga	0.1223125088698072	0.42509085161017307	0.1533467801430925	0.7976203266587907	0.8187576414307699
YMR321C	apj1dsis14x	-0.1019028464313099	0.5213730139306156	0.15891768315639931	-0.6412303804544011	0.9995467300026422
YMR321C	apj1dydj14x	-0.040981742710710645	0.7898668050039006	0.1537871225956807	-0.2664835782021561	0.9677564731844864
YGL165C	apj1d	0.060383427975574396	0.9467601350302962	0.9042702063523896	0.06677586804407362	NA
YGL165C	sis14xcga	0.727689846810803	0.4641616144389387	0.9940963413480448	0.7320113921996925	0.9792828732932796
YGL165C	ydj14xcga	0.6071523153667376	0.4933460554539803	0.886358121907879	0.6849966174618528	NA
YGL165C	apj1dsis14x	-0.0385816619651269	0.9675748948254647	0.9491175551446732	-0.04065003513631768	NA
YGL165C	apj1dydj14x	-0.48053033595397915	0.6098569415351638	0.9417036257856254	-0.5102776742025306	NA
YGR283C	apj1d	0.14700987009553634	0.45789463520575324	0.1980416111089486	0.7423180879631495	0.9997008385809374
YGR283C	sis14xcga	-0.3493106896260785	0.13500388805481206	0.23370619855482125	-1.4946573594800887	0.9792828732932796
YGR283C	ydj14xcga	0.12517036605299492	0.5298814918400898	0.1992565592232759	0.6281869291576792	0.8828690113287297
YGR283C	apj1dsis14x	0.02573547752500003	0.8997097879167586	0.20420449901154855	0.12602796534636873	0.9995467300026422
YGR283C	apj1dydj14x	-0.010960449300881827	0.9561713922229118	0.1994307670987495	-0.054958667914337844	0.9958293089450293
EFG1	apj1d	0.13748150592744254	0.43495423198488004	0.17609082086527575	0.7807420355694032	0.9997008385809374
EFG1	sis14xcga	-0.12202322079359157	0.5464217519910769	0.20231638514029676	-0.6031306891380759	0.9816226614664663
EFG1	ydj14xcga	0.15323466540854008	0.3856568685643653	0.17663520374293698	0.8675205290987607	0.7980854146838554
EFG1	apj1dsis14x	-0.09030488842253777	0.6179670934266648	0.18106839859253399	-0.4987335676710476	0.9995467300026422
EFG1	apj1dydj14x	0.009537841367845743	0.9569795429835036	0.17680907243047936	0.05394429842731054	0.9958293089450293
URM1	apj1d	0.12434373328383759	0.3430452109729139	0.13114138215143736	0.9481654931793376	0.9997008385809374
URM1	sis14xcga	0.18168956953685692	0.22173481248911053	0.14869088235785174	1.2219281145940597	0.9792828732932796
URM1	ydj14xcga	0.2564163123172967	0.050306439793836	0.13100182987507977	1.9573490886486793	0.29591255141531886
URM1	apj1dsis14x	0.10217289166747617	0.4461826984121894	0.13412134048000707	0.7617944415244394	0.9995467300026422
URM1	apj1dydj14x	-0.02383366778665041	0.8565482338095527	0.131845374248849	-0.1807698443910972	0.9781105264839408
PRR1	apj1d	0.009657084623038856	0.9494466562525988	0.15231593098238755	0.06340167151757432	0.9997008385809374
PRR1	sis14xcga	-0.2034299908551761	0.2702912536708017	0.1845350621924167	-1.1023920789809443	0.9792828732932796
PRR1	ydj14xcga	0.08370179664612197	0.5834693823217134	0.15265022397912584	0.5483240997901698	NA
PRR1	apj1dsis14x	0.1504931363377228	0.34081855918458887	0.15798989335939026	0.9525491355031547	0.9995467300026422
PRR1	apj1dydj14x	-0.017848672613489557	0.9071447920408182	0.15302269435119079	-0.1166406897301548	0.9859577703565844
UTP23	apj1d	-0.10013791442074668	0.5137853007721543	0.1533611306367184	-0.652954982823863	0.9997008385809374
UTP23	sis14xcga	-0.17317487677196522	0.32159911503426314	0.17471638357799565	-0.991177090697151	0.9792828732932796
UTP23	ydj14xcga	-0.11689493731413375	0.4478776265496931	0.15402027932347617	-0.7589580919317053	0.8274857991362001
[truncated: 27,862 more rows]
