# Supplementary material for: Nuclear and cytosolic J-domain proteins provide synergistic control of Hsf1 at distinct phases of the heat shock response
Source: bioRxiv preprint, doi:10.1101/2025.04.14.648540, version 2 (2025-07-08)
Supplement: RH_Table_S7_DeSeq2_log2fc_RNAseq [file 648540_file07.xlsx]

## Sheet: Sheet 1 - DeSeq2_log2fc_RNAseq
DeSeq2_log2fc_RNAseq
genes	strain	log2FC	pvalue	lfcSE
YBR230W-A	apj1d	1.269098219762322	0.003860982365856729	0.439240438974659
YBR230W-A	sis14xcga	0.9219030961528387	0.03602809494105107	0.4397112504887868
YBR230W-A	ydj14xcga	0.8493646095386401	0.052895889475889545	0.4387735397965002
YBR230W-A	apj1dsis14x	1.2678303384551775	0.0038549008250183298	0.4387263631043776
YBR230W-A	apj1dydj14x	0.29918390536249273	0.49574593183046894	0.43920227292848407
HRT3	apj1d	0.1853012195438233	0.483574859235932	0.2645027373514177
HRT3	sis14xcga	0.21118596837836207	0.4212419334366225	0.2625814288715078
HRT3	ydj14xcga	0.2418634075826847	0.3539093732230733	0.260900522139333
HRT3	apj1dsis14x	-0.010698549146660012	0.9678805016952755	0.26569222499043144
HRT3	apj1dydj14x	0.15256689228985743	0.5560915995043831	0.2591780505773459
PRM4	apj1d	-0.14130439507756398	0.7051217663617115	0.37341044435339954
PRM4	sis14xcga	0.16850670168025875	0.6421369051442785	0.362603703623337
PRM4	ydj14xcga	0.0828110910181816	0.8180730951273945	0.3600106045954536
PRM4	apj1dsis14x	0.012838032195252085	0.9722482676182597	0.36902928294976484
PRM4	apj1dydj14x	-0.03819929771587866	0.9144644942978749	0.3556432748089464
TIM21	apj1d	0.23800486029367696	0.30689741169738394	0.23293756876246824
TIM21	sis14xcga	0.10557727484591722	0.6497233542696738	0.23247402405483422
TIM21	ydj14xcga	0.10892973905682327	0.6381286540667015	0.2316092585131101
TIM21	apj1dsis14x	-0.02722687273240016	0.9073119469756633	0.2338480439295763
TIM21	apj1dydj14x	-0.006977097446046746	0.9758675667239258	0.2306468379622394
RMD5	apj1d	-0.45133236501971963	0.47432494496417454	0.6308283664235668
RMD5	sis14xcga	0.16930146519221517	0.7770854732753377	0.5979865456877573
RMD5	ydj14xcga	-0.10527759084239732	0.8602913958868239	0.5981571133048386
RMD5	apj1dsis14x	-0.31455060801288925	0.6134256608655321	0.6226387008007751
RMD5	apj1dydj14x	0.19145970290593048	0.7417976869832161	0.58110773712985
CCC1	apj1d	0.19992337092000595	0.41787102590044645	0.2467823182032055
CCC1	sis14xcga	0.13830676308561266	0.573830341140334	0.2459139502641238
CCC1	ydj14xcga	-0.019119457158994702	0.9379128421909082	0.245456674176405
CCC1	apj1dsis14x	-0.07616890576119656	0.7587827390530907	0.2480428228640343
CCC1	apj1dydj14x	0.12554635396999245	0.6060101232411501	0.24341205268212546
NHP10	apj1d	0.542445056891774	0.020734974657209908	0.23454287316214187
NHP10	sis14xcga	0.4886501597337835	0.036727983579424306	0.23394102486571544
NHP10	ydj14xcga	0.40877653340043196	0.08003720360254335	0.23352383956371453
NHP10	apj1dsis14x	0.40438596933222243	0.08500863380347808	0.23478921795942284
NHP10	apj1dydj14x	0.0377834476622498	0.8713396167319308	0.23329290073781778
ILV1	apj1d	0.22402932656305607	0.5003994321000887	0.3324560885660771
ILV1	sis14xcga	0.3275188910293668	0.3198773488188658	0.3292606932189672
ILV1	ydj14xcga	-0.040745976821876584	0.901723263917218	0.32996773113283373
ILV1	apj1dsis14x	-0.04695603363054444	0.888615262668639	0.33526467313240116
ILV1	apj1dydj14x	0.16043058286390327	0.6218424170934131	0.3252581022865459
PTK1	apj1d	0.655132246245685	0.2896372765770707	0.6186810035437792
PTK1	sis14xcga	-0.06781650027116533	0.9148944277340388	0.6345873631324109
PTK1	ydj14xcga	-0.31441933616934264	0.6199156399679218	0.6339484094174661
PTK1	apj1dsis14x	-0.33788526987813516	0.606496826898779	0.6559854715764063
PTK1	apj1dydj14x	-0.16469279886686672	0.7887234438841397	0.6145972443184219
YOL046C	apj1d	NA	NA	NA
YOL046C	sis14xcga	NA	NA	NA
YOL046C	ydj14xcga	NA	NA	NA
YOL046C	apj1dsis14x	NA	NA	NA
YOL046C	apj1dydj14x	NA	NA	NA
YBR116C	apj1d	-0.005816217403597296	0.9958834087623365	1.1273039298970535
YBR116C	sis14xcga	0.7766436362178574	0.4496892322758392	1.0273971436116107
YBR116C	ydj14xcga	0.963172489017908	0.3345456875209744	0.9981080146467055
YBR116C	apj1dsis14x	0.47787596292580636	0.654838041500148	1.06895113400382
YBR116C	apj1dydj14x	1.6628973581126905	0.08181881036885835	0.9555623604125248
OSH6	apj1d	-0.5711597179542584	0.0792697725052122	0.3254584776920083
OSH6	sis14xcga	-0.5424169640929086	0.0928840836402651	0.32279489820689716
OSH6	ydj14xcga	-0.3606721138884789	0.25926291457475764	0.3197065222782752
OSH6	apj1dsis14x	-0.3225001475652108	0.3174580606305384	0.32259849220182873
OSH6	apj1dydj14x	-0.25679379209853664	0.417435106951821	0.3166856735048109
YML053C	apj1d	0.23956668114781357	0.39823362371251764	0.28358466219887407
YML053C	sis14xcga	0.3697053769068114	0.18860548767584953	0.28120558177489924
YML053C	ydj14xcga	-0.0086924782705471125	0.975409346072632	0.28199721981313025
YML053C	apj1dsis14x	-0.09038529135163136	0.7516141889937618	0.28556703444045867
YML053C	apj1dydj14x	-0.31941915683600486	0.25585373574301573	0.2811180256186635
SLM2	apj1d	-0.1529271573372792	0.7154845288810864	0.4195530203080115
SLM2	sis14xcga	-0.32615312312583267	0.43534659022553596	0.4181046993321413
SLM2	ydj14xcga	-0.6746841387500967	0.10787289461954298	0.41962462157792957
SLM2	apj1dsis14x	-0.3361209677404807	0.42696055154776724	0.42311112212352964
SLM2	apj1dydj14x	-0.4260392345371544	0.2947935996939949	0.40665650054660246
YJR096W	apj1d	0.5215446061577004	0.06908291837634137	0.2868976152380446
YJR096W	sis14xcga	0.7756457044895663	0.006255876713151394	0.28369746414658065
YJR096W	ydj14xcga	0.32289204860272047	0.2569478302637497	0.28482902079336714
YJR096W	apj1dsis14x	0.5363366312678902	0.061116351706350394	0.28640474352245826
YJR096W	apj1dydj14x	0.7397194279536632	0.0084318800651464465	0.28080639861971374
TOA2	apj1d	0.9071721594844837	0.0025182541643416034	0.300274845807623
TOA2	sis14xcga	0.6951851870222772	0.020581142496815766	0.3002205951893129
TOA2	ydj14xcga	0.3042359188529131	0.31116938493088075	0.30039941067155934
TOA2	apj1dsis14x	0.8588315685904122	0.004232438733399284	0.3002595340812337
TOA2	apj1dydj14x	-0.20076997226768717	0.5039798550238099	0.30044551784741264
ODC1	apj1d	0.14912659715435947	0.6733918117881649	0.3538018262272804
ODC1	sis14xcga	0.23990611418327334	0.49060464301411055	0.34801914966912406
ODC1	ydj14xcga	0.030306244503121058	0.9305293435519101	0.34763295710628805
ODC1	apj1dsis14x	0.6347908328073737	0.06597433025118943	0.345258082566178
ODC1	apj1dydj14x	-0.08711845531313125	0.7995795434233699	0.3431329018139486
COA6	apj1d	0.30048840029313606	0.3443229070928435	0.3177557961100659
COA6	sis14xcga	0.6142074607676702	0.049845610531298	0.3131655976560991
COA6	ydj14xcga	0.29730795314940706	0.34330401225306867	0.3137294402885292
COA6	apj1dsis14x	0.6886197390416698	0.02829835465167261	0.3139901526576285
COA6	apj1dydj14x	0.03652911389140614	0.9069072570889636	0.3123736843789846
MDV1	apj1d	-0.38086583972438337	0.2813441622026447	0.3535358556246314
MDV1	sis14xcga	-0.1776183841785705	0.6091801970673137	0.3474238849807485
MDV1	ydj14xcga	-0.0050233679456574	0.9883077741062	0.3427853950690854
MDV1	apj1dsis14x	-0.22131316678482096	0.5278705187826952	0.35058954679126636
MDV1	apj1dydj14x	-0.1738845570785664	0.6095963489383318	0.34051630272085814
LRO1	apj1d	-0.07412625655161512	0.9059858604023245	0.6276395111818007
LRO1	sis14xcga	0.6864528443260638	0.2416582302757865	0.5862848453167692
LRO1	ydj14xcga	0.1217537774245156	0.8380204782725147	0.5955880068741664
LRO1	apj1dsis14x	-0.3878811077933005	0.5474110377384849	0.6447018749940479
LRO1	apj1dydj14x	0.3666613738990788	0.524219594471766	0.5757380204573062
BUD32	apj1d	0.34202543612853376	0.18535315089142812	0.2582393121097453
BUD32	sis14xcga	0.37098881389309474	0.1497479222281725	0.25755556619041015
BUD32	ydj14xcga	0.19460615768933978	0.4496558940521677	0.2574193566053271
BUD32	apj1dsis14x	0.2702613566483277	0.2953557636872683	0.25826625757418487
BUD32	apj1dydj14x	-0.14507786627178482	0.572657627449404	0.25716559972252273
PHO5	apj1d	1.5915826584733568	7.248492347687683e-5	0.40110669127153503
PHO5	sis14xcga	1.8178742977928628	5.213864251027015e-6	0.3990072524875297
PHO5	ydj14xcga	0.16518547455722948	0.6848878599488746	0.4070589786511838
PHO5	apj1dsis14x	1.7892015765940226	7.60454799086923e-6	0.3997299969608653
PHO5	apj1dydj14x	-0.24172014604274417	0.5517631335527704	0.4061702997707922
MTD1	apj1d	0.4619695780369472	0.045559024371203634	0.23104761937152823
MTD1	sis14xcga	0.4087994311794072	0.07588022838224576	0.23029566157072034
MTD1	ydj14xcga	0.5110626226151546	0.025837549555636437	0.22931542472825753
MTD1	apj1dsis14x	0.2859887759663636	0.2166296332345965	0.23146866725606186
MTD1	apj1dydj14x	0.20535967100367514	0.3696254984689447	0.22889586963047615
MET32	apj1d	0.3081625946722897	0.4456555016786042	0.4040533841504528
MET32	sis14xcga	0.32118381622307207	0.4213738807940353	0.39946249033113806
MET32	ydj14xcga	0.07684636144425909	0.8472467232733956	0.3989271141335543
MET32	apj1dsis14x	0.3291677583957152	0.41392299991049203	0.40289342901589303
MET32	apj1dydj14x	-0.4189147515884372	0.29472228530122624	0.39979709580103423
NOP8	apj1d	-0.2426858785799225	0.49222521048738693	0.35337084525379936
NOP8	sis14xcga	-0.8048658742473641	0.025799810207741976	0.36105400302598795
NOP8	ydj14xcga	-0.574830416151108	0.10019532326289186	0.34967322514979354
NOP8	apj1dsis14x	-0.142960257361457	0.6834747271116097	0.35062811820031714
NOP8	apj1dydj14x	-0.5252360635047192	0.1243870835310741	0.34181321876213994
CDC31	apj1d	0.5548310917774113	0.03983210460692016	0.2699269867871225
CDC31	sis14xcga	0.44019146276388044	0.10246820364942169	0.2695593670339448
CDC31	ydj14xcga	0.3664088330321512	0.17349162869952392	0.26920649471509034
CDC31	apj1dsis14x	0.3176017739037402	0.24015565578385697	0.2703919319686529
CDC31	apj1dydj14x	0.1480485519635173	0.5816709801461757	0.26871719669464633
YDL016C	apj1d	0.03029445724714282	0.9416813474658627	0.414103127214371
YDL016C	sis14xcga	0.2944025051923238	0.4693344685170235	0.4068792537457984
YDL016C	ydj14xcga	-0.31861870854821916	0.43860551278517407	0.41135967901019704
YDL016C	apj1dsis14x	-0.16693666559062043	0.6889988554081661	0.4171184369429055
YDL016C	apj1dydj14x	-0.13789066316838214	0.7326051752422535	0.4035877884997332
YKR051W	apj1d	-0.2867587716422109	0.3201294289471219	0.2884340122833332
YKR051W	sis14xcga	0.1492306102490503	0.5973892166711863	0.2825488255615595
YKR051W	ydj14xcga	-0.0761092817060398	0.7874183505122513	0.2822369022013625
YKR051W	apj1dsis14x	-0.37400595483080856	0.19556557911390138	0.28896631674182616
YKR051W	apj1dydj14x	-0.1473512742145833	0.5987094100042241	0.2799985091450415
SCW11	apj1d	-0.951391110163518	0.04329201616125994	0.4707802172937234
SCW11	sis14xcga	-0.3631994859936415	0.4168413231677906	0.44733771442639797
SCW11	ydj14xcga	-0.4301649799507109	0.3320747913006084	0.44349500838063927
SCW11	apj1dsis14x	-0.11888910582303566	0.7899565731050817	0.44633570682158025
SCW11	apj1dydj14x	0.6794278774127707	0.1098362478033519	0.42492670134136146
MPM1	apj1d	0.15550452730845982	0.7746983556219298	0.5432762635873278
MPM1	sis14xcga	0.03681897948592761	0.9455058231645541	0.5386710696775627
MPM1	ydj14xcga	0.6713226317621404	0.19253445757205517	0.5151663924571324
MPM1	apj1dsis14x	0.2895427238949829	0.5895849280798657	0.5367492228902223
MPM1	apj1dydj14x	0.36962010478527035	0.47043934300698703	0.5121063147669095
MTC1	apj1d	-0.6081676818262411	0.022695943195495002	0.266914118407247
MTC1	sis14xcga	-0.6514863956886947	0.014383780377346353	0.2661808018081308
MTC1	ydj14xcga	-0.12975308218083814	0.6236667516670755	0.26444587088763716
MTC1	apj1dsis14x	-0.613290210219472	0.0214614531385995	0.26667499246455617
MTC1	apj1dydj14x	-0.2942726194505888	0.26487557195458805	0.26393552407406784
PEX13	apj1d	-0.045640894726463904	0.898382647297678	0.35739392718745566
PEX13	sis14xcga	-0.010289998875831985	0.9766720267225468	0.3518977513888136
PEX13	ydj14xcga	0.07365154813455793	0.8314374314754969	0.3460119841626883
PEX13	apj1dsis14x	-0.16060890750528176	0.6547048058942466	0.3591145940502647
PEX13	apj1dydj14x	0.01069486923576704	0.9749836301966465	0.34105159044740646
MSB2	apj1d	-0.18042271311124328	0.5952364245209418	0.33961080638584146
MSB2	sis14xcga	-0.4798830400092738	0.15920726775977145	0.3408883129111738
MSB2	ydj14xcga	-0.5273412968371312	0.11713614556441902	0.33654893722290863
MSB2	apj1dsis14x	-0.6543576923185906	0.06092803466313247	0.34917376540218675
MSB2	apj1dydj14x	-0.14320811836772365	0.6602613137937576	0.3258044194619162
NUS1	apj1d	0.04583695600165983	0.9111922625709106	0.41096546960426794
NUS1	sis14xcga	0.2853275551890253	0.47541368976714843	0.39978729272930075
NUS1	ydj14xcga	0.198657882634902	0.6163519534772132	0.39650116308017314
NUS1	apj1dsis14x	0.19325237287393243	0.6341687440953212	0.4061053842505737
NUS1	apj1dydj14x	0.3186809273240328	0.4115253849011032	0.38806158898287596
SSU1	apj1d	0.08009426670625137	0.8045672723012914	0.32369091119598026
SSU1	sis14xcga	0.3835744233044718	0.22501893909280007	0.3161440397701829
SSU1	ydj14xcga	0.553439133496818	0.07586251457384714	0.3117590609669403
SSU1	apj1dsis14x	-0.15666384791908516	0.6320119347742428	0.3271347731912462
SSU1	apj1dydj14x	0.6507931151726093	0.03446828833051535	0.3077690310270336
RSC2	apj1d	-0.07458455405373503	0.8752366296214105	0.47502930198158616
RSC2	sis14xcga	-0.6855546937089293	0.16076995258864193	0.48881367831046674
RSC2	ydj14xcga	-0.27561191495797466	0.553987206013214	0.46572115679019904
RSC2	apj1dsis14x	-0.6604525631388873	0.18328610037320492	0.49631779240534074
RSC2	apj1dydj14x	0.22602970677801093	0.6130819458343812	0.4469825010643517
FMP30	apj1d	-0.27015484977289267	0.5077753042333486	0.40790051608038336
FMP30	sis14xcga	0.22830057528884284	0.5572759546545284	0.38899901222398875
FMP30	ydj14xcga	0.3217919128894807	0.4007175977266054	0.3829304667151806
FMP30	apj1dsis14x	0.02713677843251307	0.9456483001160065	0.398060355194987
FMP30	apj1dydj14x	-0.01945521029967585	0.959279849606552	0.3810464856534924
YOR072W-B	apj1d	NA	NA	NA
YOR072W-B	sis14xcga	NA	NA	NA
YOR072W-B	ydj14xcga	NA	NA	NA
YOR072W-B	apj1dsis14x	NA	NA	NA
YOR072W-B	apj1dydj14x	NA	NA	NA
NAR1	apj1d	0.23980719796849195	0.4494877613719714	0.31709234215642007
NAR1	sis14xcga	0.35684534013363867	0.254147993099612	0.31293108212149257
NAR1	ydj14xcga	0.36164077741929274	0.24395662084990385	0.3103802123938766
NAR1	apj1dsis14x	0.1981774895926161	0.5319626706230487	0.3170774999689308
NAR1	apj1dydj14x	0.25584643943840946	0.40574335419767904	0.30772681245306854
SDC1	apj1d	0.44505615943624066	0.10036548518646479	0.27086629064440493
SDC1	sis14xcga	0.33457279971438914	0.2160731623238352	0.2704629412299966
SDC1	ydj14xcga	-0.04683875099333007	0.862692339555298	0.2708257053460228
SDC1	apj1dsis14x	0.22234246101589494	0.4126720511604832	0.2714139837926358
SDC1	apj1dydj14x	-0.5128776104338268	0.05827376720461602	0.2708432234000218
BEM1	apj1d	-0.547824260891577	0.21749940507023374	0.4442281676222551
BEM1	sis14xcga	-0.9218087628602697	0.0400066252159317	0.4488569489832741
BEM1	ydj14xcga	-0.40591750390845227	0.34104877430186586	0.4263413613836296
BEM1	apj1dsis14x	-0.6294540893487011	0.15766100807332586	0.4454791896045825
BEM1	apj1dydj14x	-0.22004097637538494	0.5955502311162126	0.41453786787431623
YKR018C	apj1d	-0.6887797952223351	0.026718645567583008	0.31087678330550644
YKR018C	sis14xcga	-0.6529310918982166	0.03378885942262175	0.3076116554186117
YKR018C	ydj14xcga	-0.27991309103840534	0.3547442735148275	0.3024693934949152
YKR018C	apj1dsis14x	-0.42207953058098574	0.16954702063163118	0.30726620370447977
YKR018C	apj1dydj14x	0.2379363384053529	0.4239684460075415	0.29758581229361
ECM27	apj1d	0.6040258950874189	0.5782435535962069	1.0864709760119042
ECM27	sis14xcga	0.39107689391074246	0.7184590794140875	1.0847609576006976
ECM27	ydj14xcga	1.1218132740630655	0.26817020670925673	1.013119525015612
ECM27	apj1dsis14x	1.5858317391137993	0.11781770772405427	1.0139592970441846
ECM27	apj1dydj14x	1.2068777524243541	0.22314756716155543	0.9907048733661804
PDR15	apj1d	-0.4890119526076126	0.39305706637241367	0.5725555382193919
PDR15	sis14xcga	-0.19461541857444045	0.7234126283299942	0.5499139277071454
PDR15	ydj14xcga	-0.3927914930411135	0.4726202439244251	0.5468940539499825
PDR15	apj1dsis14x	0.3598059261092785	0.5038750107253989	0.5383051395925644
PDR15	apj1dydj14x	-0.12687201873448703	0.809881882448142	0.5273624384302664
PGM1	apj1d	-0.7964497583182754	0.023358448867361225	0.3512425854912069
PGM1	sis14xcga	-0.6263528945366799	0.07222353952451242	0.34841778323376776
PGM1	ydj14xcga	-0.19557352090123903	0.5714351966590667	0.34557345322700284
PGM1	apj1dsis14x	-0.8034244654476531	0.0219768141164806	0.3507226994658133
PGM1	apj1dydj14x	-0.23498410771314482	0.4948216461096231	0.34421831130275493
OXA1	apj1d	-0.11683012817346619	0.7550944198779509	0.37454067211338415
OXA1	sis14xcga	-0.053533679323032636	0.8846421199894278	0.36897620227366845
OXA1	ydj14xcga	0.1751995384095081	0.6282830490011586	0.36187419116048014
OXA1	apj1dsis14x	0.09914333483102881	0.7885984220463689	0.36975696490381516
OXA1	apj1dydj14x	0.0765200000554956	0.8307960245666762	0.358104323181174
PET100	apj1d	0.767688418281666	0.011516231521089448	0.30383871312541694
PET100	sis14xcga	0.7707921236780446	0.010884398931224537	0.3027001321556883
PET100	ydj14xcga	0.5341838041145982	0.07766235051579072	0.30275427987315534
PET100	apj1dsis14x	0.9054513296628459	0.0027993227556998507	0.3029322864149032
PET100	apj1dydj14x	-0.09646197557895021	0.7505009997194574	0.30335974669523874
VPS41	apj1d	-0.5069703013522824	0.13734356136206308	0.3412203338241536
VPS41	sis14xcga	-0.6281339169228773	0.06449844754802715	0.33976717490112535
VPS41	ydj14xcga	-0.2766904848769912	0.40549665067966933	0.3326227951903952
VPS41	apj1dsis14x	-0.7077025102443366	0.0396262008124261	0.3439415395868022
VPS41	apj1dydj14x	-0.2509840040249744	0.4456952439379729	0.32911131042687763
SLX9	apj1d	0.035622344301751034	0.8828819652068003	0.2418077369017337
SLX9	sis14xcga	-0.0129074360862452	0.9572786151095527	0.24095006679779082
SLX9	ydj14xcga	-0.01057306623765714	0.9648714391691496	0.24007131923665398
SLX9	apj1dsis14x	-0.10975693136257643	0.6504366318897478	0.24220578538353146
SLX9	apj1dydj14x	-0.3063520008292023	0.20094234580452805	0.23954871541351366
SCO1	apj1d	-1.1107940854950065	0.00376879640609442	0.38344340724599296
SCO1	sis14xcga	0.7686648422747484	0.029188994287497126	0.3524490687757405
SCO1	ydj14xcga	-0.23154130601653636	0.5185755016787389	0.3586769330141644
SCO1	apj1dsis14x	0.8680670302682102	0.013971038890510145	0.35315886976529814
SCO1	apj1dydj14x	0.4027120865360906	0.2502888195354987	0.35029159824865025
PGM2	apj1d	0.3477511221025208	0.5998111936175856	0.6627971227880397
PGM2	sis14xcga	0.8880676836595489	0.1562307554349785	0.626342361533152
PGM2	ydj14xcga	0.7791860835035489	0.20962214485241806	0.6210608204305751
PGM2	apj1dsis14x	1.1937174914734732	0.055140778512469915	0.6224523388052793
PGM2	apj1dydj14x	1.6480388693159587	0.005326214877440091	0.5914130322504149
FEN2	apj1d	-0.12779198161271743	0.7006216950060948	0.3323749568320884
FEN2	sis14xcga	-0.14030190607424703	0.6695663325894865	0.3287735668197022
FEN2	ydj14xcga	0.0654921254790614	0.839012207315139	0.32237175486715897
FEN2	apj1dsis14x	-0.43320713118179344	0.19946211355805032	0.33762919298613187
FEN2	apj1dydj14x	0.4543920267637773	0.14952084603219234	0.3152815918933193
ZPS1	apj1d	0.6068874328512837	0.10192897717364804	0.37105492630192116
ZPS1	sis14xcga	0.7506211432410045	0.03958469753610911	0.36472326954780393
ZPS1	ydj14xcga	0.031216657679902282	0.9331593658117746	0.3722005264746716
ZPS1	apj1dsis14x	0.3588310213587367	0.33855608752988164	0.374945376691561
ZPS1	apj1dydj14x	0.40654184278248207	0.2588694211218202	0.3600687247645943
1	apj1d	-0.7798773317761285	0.05879192289303814	0.4126889449007855
1	sis14xcga	-0.8863968922303013	0.030848162455086925	0.4105540918748201
1	ydj14xcga	-0.6143069324256549	0.12740540809053955	0.40297915560037867
1	apj1dsis14x	-1.173430407036688	0.005196643598982445	0.4198943885464608
1	apj1dydj14x	-0.46447449016146686	0.24254440317795656	0.39744510554943024
LNP1	apj1d	-0.103728224171305	0.7314488240042332	0.30223937459150957
LNP1	sis14xcga	0.11389249268271623	0.700658766784215	0.2962622377966765
LNP1	ydj14xcga	0.48642710321737564	0.0943659102788423	0.2907854938927093
LNP1	apj1dsis14x	0.05167390340585862	0.8629411569464499	0.2993308221437984
LNP1	apj1dydj14x	0.3486684567077865	0.22705816731918033	0.2886396023382381
YFL015C	apj1d	NA	NA	NA
YFL015C	sis14xcga	NA	NA	NA
YFL015C	ydj14xcga	NA	NA	NA
YFL015C	apj1dsis14x	NA	NA	NA
YFL015C	apj1dydj14x	NA	NA	NA
YER147C-A	apj1d	NA	NA	NA
YER147C-A	sis14xcga	NA	NA	NA
YER147C-A	ydj14xcga	NA	NA	NA
YER147C-A	apj1dsis14x	NA	NA	NA
YER147C-A	apj1dydj14x	NA	NA	NA
YJL009W	apj1d	NA	NA	NA
YJL009W	sis14xcga	NA	NA	NA
YJL009W	ydj14xcga	NA	NA	NA
YJL009W	apj1dsis14x	NA	NA	NA
YJL009W	apj1dydj14x	NA	NA	NA
YNL109W	apj1d	0.5635174282262138	0.5952750964570139	1.0608238430240886
YNL109W	sis14xcga	0.9582905181346861	0.3464977765847705	1.0179374034560602
YNL109W	ydj14xcga	-0.250231189159047	0.8177866425356624	1.0861073387924356
YNL109W	apj1dsis14x	1.0733566106842782	0.29388749820190513	1.0226031269234621
YNL109W	apj1dydj14x	0.2806927327809381	0.7823222246270236	1.0159202906463554
YLF2	apj1d	-0.7790783123408831	0.020618278562239332	0.3365491091145273
YLF2	sis14xcga	-0.1268958095956652	0.689708006447423	0.3178343867478355
YLF2	ydj14xcga	0.26279818155402684	0.3956760913076413	0.30940407982006607
YLF2	apj1dsis14x	0.06319496256631249	0.84246132103583	0.3179682340494756
YLF2	apj1dydj14x	-0.12447480323018897	0.6868507771408292	0.30876898629948035
DCS2	apj1d	0.128463218741602	0.8467970069617389	0.6649000616850159
DCS2	sis14xcga	-0.23006970354496117	0.7320678599745165	0.6719794183261792
DCS2	ydj14xcga	0.043227567519296635	0.946481728599943	0.6439805279807277
DCS2	apj1dsis14x	0.91107756335105206	0.14719046796117896	0.6285343896871554
DCS2	apj1dydj14x	1.1328387787689451	0.05968773579918238	0.6015840141746921
CUE5	apj1d	-0.7254606184813499	0.08503788176533045	0.4212468286886267
CUE5	sis14xcga	-0.519189716591968	0.20452963316813288	0.40921301820329403
CUE5	ydj14xcga	-0.5676473237515713	0.16126368871883312	0.4052209490630532
CUE5	apj1dsis14x	-0.24700358832870734	0.5444215821603207	0.4075023262255481
CUE5	apj1dydj14x	-0.709662878360538	0.07556838814366536	0.39936029170180143
STE6	apj1d	-0.24542938392332206	0.42742757581677326	0.30926031010225474
STE6	sis14xcga	-0.2945730537265633	0.33793274071687507	0.3074047831163656
STE6	ydj14xcga	-0.765559571320099	0.013315454369728258	0.3092896463605513
STE6	apj1dsis14x	-0.48837372339572227	0.11713859745442293	0.311681938672742
STE6	apj1dydj14x	0.08201672817317998	0.7845498407101841	0.2999938687182128
CDC27	apj1d	-0.11396665514588117	0.7558407926537745	0.36651454077850926
CDC27	sis14xcga	-0.22990714880097443	0.5279329147014078	0.36425863205915976
CDC27	ydj14xcga	-0.38390294200494834	0.28945355060516986	0.3624046831286284
CDC27	apj1dsis14x	-0.667497036781605	0.0770912155760463	0.37758228943464794
CDC27	apj1dydj14x	0.08943034734735998	0.7991703313781064	0.3515053727823315
EFB1	apj1d	-0.0036734877824769357	0.9893520428255108	0.27525769825521035
EFB1	sis14xcga	0.2847222918735156	0.3008064814887154	0.2751723080437411
EFB1	ydj14xcga	0.43524572279254553	0.11366107462718847	0.2751324823653365
EFB1	apj1dsis14x	0.051062494833513106	0.8528180470300024	0.27523388391933856
EFB1	apj1dydj14x	0.906688463615312	9.797977384710683e-4	0.27506545815633343
YLR140W	apj1d	0.37004959128680415	0.6663928509357253	0.8583768828831541
YLR140W	sis14xcga	0.5149215068513547	0.5385332846669616	0.8372265551343725
YLR140W	ydj14xcga	-0.21332968425954316	0.8046010657071933	0.8622972884633998
YLR140W	apj1dsis14x	-0.8663973340941318	0.3698950632314969	0.9662388483632895
YLR140W	apj1dydj14x	-0.6978433518340659	0.4199720064505488	0.8653062269319463
TDH2	apj1d	-0.14969889760738403	0.4795600411315946	0.21173508419038095
TDH2	sis14xcga	0.32786030064215793	0.12122342458010638	0.2115693430567628
TDH2	ydj14xcga	0.3058084866604914	0.1482815371208702	0.21154021835209785
TDH2	apj1dsis14x	0.09812875790060543	0.6429098303154066	0.21165123906568148
TDH2	apj1dydj14x	0.3886740458752056	0.06606953340601628	0.21147131397346422
SBE22	apj1d	-0.5662440054961998	0.10250075783309186	0.3467828343547632
SBE22	sis14xcga	-0.7614559039763308	0.027803539575422514	0.3461088792477745
SBE22	ydj14xcga	-0.9018811715728274	0.008725766859924326	0.3438861503750093
SBE22	apj1dsis14x	-0.5025352457347046	0.14538589916170763	0.3451420707147691
SBE22	apj1dydj14x	-0.24303912795335697	0.46420858903734574	0.3320504096841392
YKL075C	apj1d	0.13453794297623323	0.573734944477633	0.2391533104512906
YKL075C	sis14xcga	0.14333040245609344	0.546632996842285	0.23776920283537542
YKL075C	ydj14xcga	0.16864866603776654	0.47572680392137384	0.23647013415480164
YKL075C	apj1dsis14x	0.14246674522733913	0.5508382962559892	0.23883602266764123
YKL075C	apj1dydj14x	-0.09703858646895741	0.6806012742804444	0.23573494384930319
RBH1	apj1d	-0.7403935429979487	0.08489562673692617	0.42972165878625934
RBH1	sis14xcga	-0.6034202862744323	0.14899386014265265	0.41814330083541956
RBH1	ydj14xcga	-0.42891011208066065	0.2926795008323061	0.4076078357304796
RBH1	apj1dsis14x	-0.27448838931025715	0.5080177143851228	0.41468047073664804
RBH1	apj1dydj14x	-0.1690721612318259	0.6692694576952165	0.3958137066469789
YIR017W-A	apj1d	5.923828575183901	0.08283967028871621	3.4154086596500095
YIR017W-A	sis14xcga	1.627646550931127	0.6398505122771716	3.4785624167922857
YIR017W-A	ydj14xcga	-2.2987340399957334	0.5348280720901757	3.7037356982728307
YIR017W-A	apj1dsis14x	2.7886838780764394	0.4183529425920215	3.445873983304368
YIR017W-A	apj1dydj14x	1.4263445091306175	0.6800727357946421	3.4589463068862627
JJJ1	apj1d	-0.5855544409506254	0.07255682355760987	0.32610364836104105
JJJ1	sis14xcga	-0.8828670735197135	0.006872086909662046	0.3266272981621641
JJJ1	ydj14xcga	-0.6255686514567096	0.05221327372086247	0.32223032053535794
JJJ1	apj1dsis14x	-0.5711691676830002	0.07934020002022418	0.3255402037945624
JJJ1	apj1dydj14x	-0.3554988549750751	0.26388298297644225	0.3181879898521899
VPS70	apj1d	0.19440643637541732	0.6791453029566632	0.4700011294994463
VPS70	sis14xcga	-0.19213296652296485	0.6853635719413749	0.4742208812155869
VPS70	ydj14xcga	0.008042591187863709	0.9861138959568795	0.46209760196475175
VPS70	apj1dsis14x	-0.07235267466807406	0.8793370022847502	0.4766010151104665
VPS70	apj1dydj14x	0.7338611739350086	0.09874735442707117	0.4445065326509201
GTO3	apj1d	-0.518035994605997	0.6580397004615786	1.1703820734317123
GTO3	sis14xcga	-1.330759998926386	0.2838311920326232	1.2416672137236813
GTO3	ydj14xcga	-1.021092598604684	0.382102242805198	1.1682588685934487
GTO3	apj1dsis14x	0.17831316139742687	0.8723238770001074	1.1095517951377383
GTO3	apj1dydj14x	-0.6977912835925102	0.5284756456553501	1.107017144040984
ATP18	apj1d	0.716525885090894	0.009246316294493335	0.27528934777591724
ATP18	sis14xcga	0.6012468267573315	0.028772452263722343	0.27497005267387453
ATP18	ydj14xcga	0.22602061077620517	0.4116314401771776	0.2752904315493583
ATP18	apj1dsis14x	0.6602692964994363	0.01643863918791029	0.27522362533978756
ATP18	apj1dydj14x	-0.08045834583462808	0.7698019101612829	0.2749452946725678
YOR1	apj1d	-0.697122816253308	0.05910928244238488	0.3693601455952489
YOR1	sis14xcga	-0.5003237858763309	0.16791167445034536	0.36283081734268
YOR1	ydj14xcga	-0.5769751302430192	0.10924331899553483	0.36024842261145673
YOR1	apj1dsis14x	-0.15579960852939664	0.6660571693934911	0.361010263019756
YOR1	apj1dydj14x	-0.3071903322954205	0.3851415489342709	0.3537177052068411
ECM10	apj1d	0.3622405947399914	0.3710351866990256	0.4049480422916427
ECM10	sis14xcga	0.26887931418215044	0.504048363015787	0.4024335013424624
ECM10	ydj14xcga	-0.524550069256322	0.20376437279326667	0.4127391919459292
ECM10	apj1dsis14x	0.4898579442179865	0.22309721203368454	0.40207208336738365
ECM10	apj1dydj14x	-0.1118109950427976	0.7782610161244298	0.3970759044239386
YML083C	apj1d	0.48487166457061925	0.7357093320782448	1.4364835310200017
YML083C	sis14xcga	0.7797801819196651	0.5699845378677395	1.3726729454111637
YML083C	ydj14xcga	1.5316672574927688	0.23671211578617854	1.294463470258452
YML083C	apj1dsis14x	1.9466407073073797	0.13339165488401086	1.29701644420955
YML083C	apj1dydj14x	1.6272554071881635	0.19989371500171046	1.2694541320073243
PHO92	apj1d	1.6380438258213503	0.06721528285485252	0.8949925444775271
PHO92	sis14xcga	1.0979794269534258	0.22792778693851903	0.9106466636984557
PHO92	ydj14xcga	1.7867794496430405	0.039981083741967155	0.8699259547350122
PHO92	apj1dsis14x	1.2865993785896879	0.1579615186914653	0.9112146915480591
PHO92	apj1dydj14x	0.7077144624638528	0.4284602011625278	0.8937714739041658
SKI6	apj1d	-0.2842854056262396	0.2914326584590134	0.26946893514313874
SKI6	sis14xcga	-0.19406762670887126	0.4655553811939949	0.265944511356679
SKI6	ydj14xcga	-0.027855361737814475	0.9155890904066484	0.26280748752554856
SKI6	apj1dsis14x	-0.44632874430462904	0.09907908172482066	0.2706113808572902
SKI6	apj1dydj14x	0.10862765484178483	0.6753557730189725	0.2593728196756057
INN1	apj1d	-0.683786822265478	0.39141057194621387	0.7978264720991256
INN1	sis14xcga	-0.6536613434259505	0.40226153115470553	0.7804081542190753
INN1	ydj14xcga	-0.5141084693006059	0.49768315450064526	0.7581159297763682
INN1	apj1dsis14x	-0.13097300977255869	0.8636168659809325	0.7624822093368696
INN1	apj1dydj14x	-0.16923362943468204	0.816447775484682	0.7290901774769427
SPC2	apj1d	0.4856091235542222	0.052561132301648134	0.25050648680544446
SPC2	sis14xcga	0.6235127964094629	0.012425056695951552	0.24942141114803637
SPC2	ydj14xcga	0.24976872322856286	0.31721530869960324	0.24971959448531872
SPC2	apj1dsis14x	0.4280417422395265	0.08753753378166912	0.2505317739337648
SPC2	apj1dydj14x	-0.048299558442556734	0.8463878378012293	0.24931466266271413
FHL1	apj1d	-0.8687497803931102	0.03927251494086759	0.4214531231824346
FHL1	sis14xcga	-0.8559373103018997	0.03895294729781746	0.4145610059562086
FHL1	ydj14xcga	-0.7164343984113606	0.0765360014611278	0.4045027145061997
FHL1	apj1dsis14x	-1.0375894104599674	0.014865981716674087	0.42600495418611933
FHL1	apj1dydj14x	-0.32876401926016313	0.4012188960698124	0.39164388302436326
IPI1	apj1d	-0.15518449457178793	0.5545518373593544	0.2626003506075351
IPI1	sis14xcga	-0.11254272737595916	0.6656134064549225	0.26040940136157
IPI1	ydj14xcga	0.0032873466565670915	0.9898389581389703	0.2581282785354504
IPI1	apj1dsis14x	-0.20384193267660783	0.43762147442648025	0.26260981333619754
IPI1	apj1dydj14x	-0.3643630355854725	0.15733264512660405	0.25766432719068794
EMW1	apj1d	-0.23967532341990047	0.40749859693613977	0.28935686109997544
EMW1	sis14xcga	-0.6474123595035158	0.02629665853741594	0.2913906036588524
EMW1	ydj14xcga	-0.8846906313575691	0.002357722494469153	0.2909183209173081
EMW1	apj1dsis14x	-0.42734382972861634	0.14212105238176004	0.291118437081329
EMW1	apj1dydj14x	-0.12469287728883537	0.656609220978945	0.2804611385825686
PTM1	apj1d	-0.1740846248498769	0.6718552006927417	0.4109615161092285
PTM1	sis14xcga	0.011375549253030526	0.977397860472918	0.40151778719055836
PTM1	ydj14xcga	0.25368648046761383	0.5183771271854072	0.3927953221852271
PTM1	apj1dsis14x	-0.3206884076861461	0.43855099785639456	0.4139825152972843
PTM1	apj1dydj14x	0.6624285824301981	0.08424581684782546	0.3836684883911609
YAR075W	apj1d	-0.18947491331270008	0.7435033383933387	0.579048727741019
YAR075W	sis14xcga	-0.4559368976288054	0.43243703992464216	0.5807904769724115
YAR075W	ydj14xcga	-1.2328296250232906	0.04197860348337039	0.6061907381588768
YAR075W	apj1dsis14x	0.06662058262704634	0.9065120264659606	0.5672772457302306
YAR075W	apj1dydj14x	0.30508553669766814	0.5693819230726451	0.5362142507339708
MHF1	apj1d	1.2609600108013606	8.780454764719485e-4	0.37901469014697414
MHF1	sis14xcga	0.874660952366168	0.021146578335875948	0.37940366253362434
MHF1	ydj14xcga	0.539099296479025	0.15567756615385245	0.3797115707045188
MHF1	apj1dsis14x	1.1446821884188003	0.002537262491198444	0.37917674493539527
MHF1	apj1dydj14x	0.09238377475775505	0.807737571522115	0.3796399875200753
RPS9A	apj1d	0.3312863186059349	0.23389464324285983	0.27830155020726993
RPS9A	sis14xcga	0.394800056498174	0.1558300987426945	0.27817779228627904
RPS9A	ydj14xcga	0.44496305299059513	0.10959577056257863	0.2780997042473631
RPS9A	apj1dsis14x	0.34059939516592164	0.22094888472557872	0.2782654651698832
RPS9A	apj1dydj14x	-0.17541561445236098	0.5282506156044567	0.2781378359617973
ISR1	apj1d	0.03579656792147206	0.928211027197215	0.39731639143794545
ISR1	sis14xcga	-0.12134906543119446	0.7590985178135017	0.3957058705004059
ISR1	ydj14xcga	-0.6530359260640882	0.1034063618793879	0.4009899767613447
ISR1	apj1dsis14x	-0.25638096618482076	0.5246627343842871	0.4030041954899059
ISR1	apj1dydj14x	0.5025857196736512	0.18387330408008026	0.378190187514901
MNN11	apj1d	-0.006376860986075623	0.9825918592361561	0.2922537964616673
MNN11	sis14xcga	0.1621254274250096	0.575559048979071	0.2895700426728309
MNN11	ydj14xcga	0.18209394990178754	0.5273175924033315	0.28807500643642275
MNN11	apj1dsis14x	0.20313363290199177	0.48443008922742425	0.29052495093834435
MNN11	apj1dydj14x	0.4666385975756959	0.1019866446011704	0.2853539039002738
SMI1	apj1d	-0.6723370719012997	0.02537078318075185	0.3007264430560929
SMI1	sis14xcga	-0.7337181072280232	0.01450311507647953	0.30014388939115444
SMI1	ydj14xcga	-0.2981527300235182	0.3182837291047968	0.29875292851240914
SMI1	apj1dsis14x	-0.7629407945101861	0.011195581812204093	0.30078080761615306
SMI1	apj1dydj14x	-0.5784030656649325	0.052616039635902695	0.2984445272059028
RIC1	apj1d	-0.2466175908004032	0.4721346581287319	0.3429959737214585
RIC1	sis14xcga	-0.4134255231231991	0.22648458686817197	0.3418253717798719
RIC1	ydj14xcga	-0.39288071647771355	0.24297901800136285	0.33649347216231684
RIC1	apj1dsis14x	-0.32640985525298744	0.3427295298458354	0.34402900125617636
RIC1	apj1dydj14x	-0.015291078176671058	0.9626819124927348	0.32681377883429213
NOC2	apj1d	-0.8505451192536893	0.004510518887718413	0.2994814951201688
NOC2	sis14xcga	-1.0546590254078583	4.26241918355415e-4	0.29934016991894985
NOC2	ydj14xcga	-0.5398462622148666	0.06959821819368658	0.2975151842020845
NOC2	apj1dsis14x	-1.1550737839513199	1.2020142455179506e-4	0.30035345603482844
NOC2	apj1dydj14x	-0.6196586168904389	0.03688558972161737	0.2969095629542365
GAL83	apj1d	-1.2572990069522851	0.02121204059028176	0.545657950588872
GAL83	sis14xcga	-0.9007105362363275	0.08139075889575875	0.5168557503239841
GAL83	ydj14xcga	-0.2858957303999745	0.5587095928206516	0.48891183724011467
GAL83	apj1dsis14x	-0.9823748956042511	0.06350384807743066	0.5293974234769038
GAL83	apj1dydj14x	-0.08777761766882684	0.8538715990211059	0.4765839012501478
MRPL39	apj1d	0.8670894624632862	0.018881832345111968	0.3693112164510459
MRPL39	sis14xcga	0.7964945503448807	0.030820600684921765	0.3688531366616691
MRPL39	ydj14xcga	0.3664259341509885	0.32113975680632284	0.3693368884471126
MRPL39	apj1dsis14x	1.1116162833752603	0.002564577966618731	0.36861996783934575
MRPL39	apj1dydj14x	-0.6268882078659342	0.090851595078302	0.3707373861717193
DEP1	apj1d	-0.10954784426771905	0.8559776682742521	0.6035801315416175
DEP1	sis14xcga	-0.18919464112481632	0.7509729987018852	0.5961578014971854
DEP1	ydj14xcga	0.3841831821674273	0.49892470832824126	0.5681648316104109
DEP1	apj1dsis14x	-1.1990646180564322	0.0749958299441678	0.6734464799544891
DEP1	apj1dydj14x	0.4522667440873242	0.416446750120158	0.5565666782991288
RPL8A	apj1d	-0.3552620780079591	0.16377775081818205	0.2551294322814266
RPL8A	sis14xcga	-0.23493244933256247	0.35649994949895225	0.25479226236685826
RPL8A	ydj14xcga	0.06220221399430428	0.806900734765578	0.2544825726983613
RPL8A	apj1dsis14x	-0.37579341168329833	0.14066578385828843	0.2550663609361267
RPL8A	apj1dydj14x	-0.04988670188754549	0.844482216062874	0.2543118800400682
FYV1	apj1d	-0.16000379197450912	0.6286064112988425	0.3307987230624315
FYV1	sis14xcga	-0.33023417003347916	0.3166781455311198	0.3298029373054117
FYV1	ydj14xcga	-0.8773969641770621	0.00855414521050817	0.33369004892994186
FYV1	apj1dsis14x	-0.9170684117967227	0.00746408932601709	0.3427784916223841
FYV1	apj1dydj14x	-0.8360778370610792	0.010640732521801016	0.32732413431080054
PRS3	apj1d	-0.45825259942540947	0.08022950489355139	0.26195503059228464
PRS3	sis14xcga	-0.43582471953608937	0.0953590000539032	0.26131994826701305
PRS3	ydj14xcga	-0.08708091176568551	0.7380178916888002	0.26034766861195857
PRS3	apj1dsis14x	-0.5246754995086046	0.045188037767384635	0.26195792864939715
PRS3	apj1dydj14x	-0.3299590896080745	0.204518885791996	0.26005975231564893
ESF2	apj1d	-0.8562678762025228	0.04510015122733529	0.42733926370326314
ESF2	sis14xcga	-1.041378383789657	0.014467985237656238	0.42584687560325674
ESF2	ydj14xcga	-0.06504924051951468	0.8736949244472967	0.40919981539670547
ESF2	apj1dsis14x	-1.1418728205998678	0.008268222048969324	0.43237756438435987
ESF2	apj1dydj14x	-0.2964519596946892	0.466546716249765	0.4071531333654406
RPS25B	apj1d	0.5479080606416695	0.040401921611057406	0.267322303778468
RPS25B	sis14xcga	0.4322108060630664	0.10589061860095464	0.2673012265831146
RPS25B	ydj14xcga	0.06273510213855793	0.8144564011263312	0.2673208511000349
RPS25B	apj1dsis14x	0.3305380391038927	0.21631886711419113	0.2673442898572101
RPS25B	apj1dydj14x	-0.31809551057548957	0.23404663611930177	0.26730729123495833
YAR028W	apj1d	0.38826648873678926	0.23513386126959532	0.32703348118576714
YAR028W	sis14xcga	0.873130808505665	0.006011433080223153	0.317830678902102
YAR028W	ydj14xcga	0.5096461760563168	0.10992473576138363	0.31882147386019805
YAR028W	apj1dsis14x	0.42183858526857293	0.1954720613731219	0.3258547984435075
YAR028W	apj1dydj14x	0.26519560058029845	0.4025194694741278	0.31679139908486764
AVT1	apj1d	-0.10585075423044014	0.7708526396840528	0.36342385302585556
AVT1	sis14xcga	0.12192115671760959	0.7316049243991579	0.35546417223382215
AVT1	ydj14xcga	-0.18265538415740976	0.6076631157836725	0.3557676195928076
AVT1	apj1dsis14x	0.014436873748527122	0.9680569823298292	0.3605132376750954
AVT1	apj1dydj14x	0.46591081783695704	0.1757115020701592	0.3440797548994469
YMR122C	apj1d	1.1245845601336806	0.3506243735638456	1.2048532131922516
YMR122C	sis14xcga	1.1419982168660259	0.3348874941899778	1.1842571855420838
YMR122C	ydj14xcga	0.30427034741090075	0.8050054508507335	1.2324906192286644
YMR122C	apj1dsis14x	1.7619111340892728	0.12761901966558953	1.1564446362424026
YMR122C	apj1dydj14x	0.809296075860582	0.4849280869147053	1.158788586546224
YSH1	apj1d	-0.20825614228165473	0.5316035822666806	0.3329115390113939
YSH1	sis14xcga	-0.45375737788227977	0.17297849110107716	0.33298515480687146
YSH1	ydj14xcga	-0.7073573705552038	0.033445708028478766	0.33260926925206213
YSH1	apj1dsis14x	-0.05139320762764708	0.8760537483679007	0.329499179524528
YSH1	apj1dydj14x	-0.20488137912312795	0.5219017237537368	0.3199188539684338
RIB2	apj1d	0.11176614778886258	0.8130676681110671	0.4726432761284359
RIB2	sis14xcga	-0.2461595460805319	0.6055591964296236	0.47666288402380225
RIB2	ydj14xcga	-0.20213157599932466	0.6649676690727389	0.46674668517548157
RIB2	apj1dsis14x	-0.14704469444464713	0.7593748106768947	0.4800646217852807
RIB2	apj1dydj14x	0.06143480830059444	0.8918278039374098	0.45175394008323405
TMA16	apj1d	0.2720598085311339	0.3127632859946184	0.2695153713810517
TMA16	sis14xcga	0.17166355847947923	0.5237556221491714	0.2692478981770283
TMA16	ydj14xcga	-0.04706716363932645	0.8612086286854321	0.26920775870278535
TMA16	apj1dsis14x	-0.06215911644929299	0.8179606342794814	0.2700588725369703
TMA16	apj1dydj14x	-0.28736445443012226	0.2851736904115357	0.2688741966015943
COS2	apj1d	-0.22892554817339458	0.6111870810507536	0.45030426037189414
COS2	sis14xcga	0.0043721240328762805	0.9920476855268286	0.4386638028012502
COS2	ydj14xcga	-0.0643721259465833	0.8820095198979382	0.4337093261317746
COS2	apj1dsis14x	-0.14100205785951808	0.7525679615914657	0.44726334678231716
COS2	apj1dydj14x	-0.671630472412665	0.12468168139295467	0.4374257412933085
SAC6	apj1d	-1.1265875062772888	6.558487792323127e-4	0.3306296374319213
SAC6	sis14xcga	-0.9441741679453568	0.004000538138385836	0.3280524775142211
SAC6	ydj14xcga	-0.4081955433355337	0.20913681780485935	0.32501133054686304
SAC6	apj1dsis14x	-0.6722034599551815	0.04023046207577016	0.3276843719268198
SAC6	apj1dydj14x	-0.16842233443700602	0.6024499168254274	0.3233415080765872
HBN1	apj1d	0.715316372519936	0.1582714120653093	0.5069896858044082
HBN1	sis14xcga	1.166186909403801	0.017535298426260438	0.49096668831262114
HBN1	ydj14xcga	0.034271231603533105	0.9466173526626681	0.5118530229393483
HBN1	apj1dsis14x	0.47031697029962266	0.3592843742418064	0.5130378607105078
HBN1	apj1dydj14x	0.01907624075606167	0.9695704745828965	0.500071791386795
TPM2	apj1d	0.5874431386335696	0.029063257410677307	0.26914494343403395
TPM2	sis14xcga	0.3685998434093417	0.17077621506862498	0.26910717070871143
TPM2	ydj14xcga	0.3390398840363505	0.20738353657084807	0.26891008970095936
TPM2	apj1dsis14x	0.29808199015824033	0.26852142718087507	0.2693981059592119
TPM2	apj1dydj14x	-0.27995380144896614	0.29808807716525154	0.26904608605911473
HFM1	apj1d	-0.8519129013544433	0.22693754704964061	0.7050594034173044
HFM1	sis14xcga	-0.31519797229178065	0.6284530118813983	0.6513627994111716
HFM1	ydj14xcga	0.21835141824536722	0.7228285196665838	0.6156274604780814
HFM1	apj1dsis14x	0.2754019266959131	0.663010200894745	0.6320023532539621
HFM1	apj1dydj14x	0.10462744253835005	0.8629015642875484	0.6058973978087897
RAI1	apj1d	0.04740909768087884	0.826661505366913	0.21649443827809245
RAI1	sis14xcga	-0.18180417869392465	0.4008836812557559	0.2164221933658987
RAI1	ydj14xcga	-0.037100862682595354	0.8630777238322125	0.2151302347806636
RAI1	apj1dsis14x	-0.25523630572178113	0.24064082408187287	0.21752107468859602
RAI1	apj1dydj14x	-0.2075357096595348	0.33304195639404466	0.21439532402565978
YGL262W	apj1d	0.5544894565894993	0.7632286027233496	1.8406668658981706
YGL262W	sis14xcga	1.2999281872752617	0.4506383549887236	1.7232399916435484
YGL262W	ydj14xcga	3.4912402714678406	0.029565824779694792	1.6045344334553644
YGL262W	apj1dsis14x	-0.8016236915715538	0.6859622261175643	1.9825453165894469
YGL262W	apj1dydj14x	0.8173426124462926	0.6309038921196617	1.7011845198757656
AIM23	apj1d	-0.18547876861650892	0.5964420646989265	0.35027458859900423
AIM23	sis14xcga	-0.22123534248178386	0.5231175538699081	0.346466714274561
AIM23	ydj14xcga	0.2936631000445259	0.3835348406234068	0.3370008222132708
AIM23	apj1dsis14x	-0.15736788056859877	0.6517512192645654	0.3486753270395376
AIM23	apj1dydj14x	-0.08919701076821165	0.7907339930096915	0.33613889141831405
YER186C	apj1d	-0.1503315260980044	0.5569793253012725	0.2559557144336281
YER186C	sis14xcga	0.006030629763472277	0.9810185591418373	0.2534735113574209
YER186C	ydj14xcga	0.06639978959205325	0.7919926565093056	0.25177764564705224
YER186C	apj1dsis14x	-0.059294247076270665	0.8161976686537161	0.2550968072921944
YER186C	apj1dydj14x	-0.004206610553270937	0.9865917529607535	0.250310993076509
UTR4	apj1d	-0.04921012830113486	0.8591866125494628	0.27738131981030656
UTR4	sis14xcga	0.209178570358938	0.4427580348024531	0.27252967999794014
UTR4	ydj14xcga	0.1684580765524507	0.5341415956358747	0.2709652300045727
UTR4	apj1dsis14x	0.15406087076519165	0.574959754388651	0.2747348330717148
UTR4	apj1dydj14x	0.3142698595265709	0.2400312512016408	0.267484498115799
MDS3	apj1d	-0.392682858835059	0.42286280684275557	0.4899566668024191
MDS3	sis14xcga	-0.4444393288269813	0.35719273479329394	0.48270454311850963
MDS3	ydj14xcga	-0.44850394135348864	0.34273715931229193	0.47272102725627124
MDS3	apj1dsis14x	-0.17081357769446684	0.721889166245337	0.4799009032841495
MDS3	apj1dydj14x	-0.06653908865467316	0.883032621303093	0.45225941783718077
ARG81	apj1d	0.34109987743776254	0.3806738461990219	0.38909231950084805
ARG81	sis14xcga	-0.3123441002360979	0.43506389283357566	0.4001561011694555
ARG81	ydj14xcga	0.1410070434761686	0.7123746555149001	0.38247627229663594
ARG81	apj1dsis14x	0.35157051029935604	0.36492814836288245	0.38804068674565734
ARG81	apj1dydj14x	0.314966922469864	0.39835341170976996	0.3729336304089768
NBL1	apj1d	-2.5505186965210074	0.17029603051110095	1.8599910246363986
NBL1	sis14xcga	-0.7544303234990923	0.6062373340749303	1.4636291980893266
NBL1	ydj14xcga	-0.6217112685685418	0.661108018167665	1.4181891121303107
NBL1	apj1dsis14x	-0.9233933613359815	0.5423065153727551	1.5154270536988195
NBL1	apj1dydj14x	-0.7136234476854308	0.6070169101084164	1.387464766036125
SNU114	apj1d	0.6355002103081505	0.09617405649000146	0.3819819571295995
SNU114	sis14xcga	0.009872814682760293	0.9797188209910317	0.38836588490364116
SNU114	ydj14xcga	-0.21769766627445036	0.5743648885602253	0.38761429952268234
SNU114	apj1dsis14x	-0.2886287323046379	0.47002297982036334	0.3995183932508693
SNU114	apj1dydj14x	0.15079092669399358	0.6882794557912162	0.3758581345021833
YPL044C	apj1d	NA	NA	NA
YPL044C	sis14xcga	NA	NA	NA
YPL044C	ydj14xcga	NA	NA	NA
YPL044C	apj1dsis14x	NA	NA	NA
YPL044C	apj1dydj14x	NA	NA	NA
WHI2	apj1d	-0.10305101891959856	0.710132860370844	0.2772591149057028
WHI2	sis14xcga	-0.2903206445986841	0.29393994835106324	0.2766229342576109
WHI2	ydj14xcga	-0.7880566114064487	0.004791936760557736	0.27938359727794104
WHI2	apj1dsis14x	-0.2609483169748478	0.34909472106890194	0.2786877151762499
WHI2	apj1dydj14x	-0.12739071720718337	0.6356988121675603	0.26891502190308786
YKL169C	apj1d	NA	NA	NA
YKL169C	sis14xcga	NA	NA	NA
YKL169C	ydj14xcga	NA	NA	NA
YKL169C	apj1dsis14x	NA	NA	NA
YKL169C	apj1dydj14x	NA	NA	NA
NFT1	apj1d	0.018030888132358334	0.9746325177688301	0.5670307746208514
NFT1	sis14xcga	0.1004659376173281	0.8572416740369995	0.5584962619097076
NFT1	ydj14xcga	1.0682177020463384	0.045913606506858946	0.5351291597485225
NFT1	apj1dsis14x	0.9020185807738311	0.09810993592940032	0.5453273292913005
NFT1	apj1dydj14x	-0.09836706588532462	0.8571075121045325	0.5463095116385577
RPL6B	apj1d	-0.039993441936213917	0.8853943029555198	0.27747316774138736
RPL6B	sis14xcga	0.10250463956858506	0.7116071254103242	0.2772654760080926
RPL6B	ydj14xcga	0.19667726320753345	0.47790610453635163	0.27713734396033823
RPL6B	apj1dsis14x	-0.30508665478980906	0.2717539173443632	0.27759567808624663
RPL6B	apj1dydj14x	0.06248266512010876	0.8215557608133097	0.2770303990843954
YNL235C	apj1d	NA	NA	NA
YNL235C	sis14xcga	NA	NA	NA
YNL235C	ydj14xcga	NA	NA	NA
YNL235C	apj1dsis14x	NA	NA	NA
YNL235C	apj1dydj14x	NA	NA	NA
IKI3	apj1d	-0.79863246841195	0.006118655437943833	0.29132774565998343
IKI3	sis14xcga	-1.1942340168962704	4.5138243211723846e-5	0.29274235092536305
IKI3	ydj14xcga	-1.0598252509809951	2.494118680556814e-4	0.2893433982198391
IKI3	apj1dsis14x	-0.7055537617902451	0.015056410894815856	0.29022959648073454
IKI3	apj1dydj14x	-0.2675201723166542	0.3448697140044392	0.2832138735905616
GAT2	apj1d	0.6743410970939825	0.37962328200693796	0.7675259439844454
GAT2	sis14xcga	0.45100935873092796	0.5566044681760695	0.767163007665521
GAT2	ydj14xcga	0.5125077118524982	0.494780595646592	0.7506795149718511
GAT2	apj1dsis14x	0.6392649814286523	0.40503481465639796	0.767735539805913
GAT2	apj1dydj14x	0.8789640550779988	0.22512816017271878	0.7246174017040488
VHT1	apj1d	0.007632266431436888	0.9816030627455834	0.3309859590198833
VHT1	sis14xcga	0.08693474494598159	0.7905138980484108	0.3272611406413041
VHT1	ydj14xcga	-0.1257991568426105	0.699986947369146	0.32646437339550594
VHT1	apj1dsis14x	-0.01163248399164912	0.9719530250385365	0.33085448798478556
VHT1	apj1dydj14x	0.07676593577763637	0.8110297820360832	0.3210650621328621
SMD1	apj1d	0.7335719358020613	0.013965089379376865	0.2984231700380543
SMD1	sis14xcga	0.49744626736817854	0.09545149548363198	0.2983514404568879
SMD1	ydj14xcga	0.2147608324601074	0.4718140728317258	0.2984735340323049
SMD1	apj1dsis14x	0.5166823334686496	0.08374477187551709	0.2987709208894273
SMD1	apj1dydj14x	-0.20880370047771818	0.48402063469272616	0.29835469440352985
MNN2	apj1d	0.07023060331717965	0.8583670213475751	0.3935517987016961
MNN2	sis14xcga	-0.13251813434603546	0.7359629082858066	0.39299066100011953
MNN2	ydj14xcga	-0.4299581295037073	0.2740221478099986	0.3930697658452127
MNN2	apj1dsis14x	-0.46432494906373084	0.2534087799963224	0.40655052427320143
MNN2	apj1dydj14x	0.14012283392609381	0.7102702717065539	0.3771882236859665
EGD2	apj1d	0.2588554050392735	0.2964695258543903	0.24793764710888172
EGD2	sis14xcga	0.260019149445257	0.29416236326346323	0.24786526633152411
EGD2	ydj14xcga	0.34840405726909957	0.1597360427603709	0.24780512286032635
EGD2	apj1dsis14x	0.10410750740943626	0.6745851077930171	0.24795555028814562
EGD2	apj1dydj14x	-0.11562741183939029	0.640774622123786	0.24779991786323105
CPR1	apj1d	0.8919546141856332	5.156762213836737e-4	0.25686396667101935
CPR1	sis14xcga	1.054072783583808	4.055864610919759e-5	0.2568231975391233
CPR1	ydj14xcga	1.0592334720965215	3.713125011990997e-5	0.2568061847207268
CPR1	apj1dsis14x	1.0371022186101446	5.393076524409839e-5	0.25684168144818587
CPR1	apj1dydj14x	0.9214422725580614	3.327418635781178e-4	0.256785187934462
ADH6	apj1d	-0.6842195056094145	0.010926103663223979	0.26884289070480616
ADH6	sis14xcga	-0.5004592827085562	0.061538218857623554	0.2676813414349999
ADH6	ydj14xcga	-0.13733072660668844	0.6064404502290657	0.2665782158130653
ADH6	apj1dsis14x	-0.667512129346806	0.012952282530879749	0.2686080526730409
ADH6	apj1dydj14x	-0.04460356418736774	0.8667757075811062	0.2658845145894823
LYP1	apj1d	-0.07581357162950114	0.82446358641123485	0.34179864917168334
LYP1	sis14xcga	0.021970966025086216	0.9483104976862013	0.33890872053807714
LYP1	ydj14xcga	0.0492019782853689	0.8838291736483397	0.33673043588036994
LYP1	apj1dsis14x	-0.5900594637414678	0.08935184140546487	0.3473335237639948
LYP1	apj1dydj14x	0.4923761606353918	0.13864215284255899	0.33249193109422687
ECM11	apj1d	0.6748424964596551	0.6179139816420157	1.3529077537267191
ECM11	sis14xcga	-3.6288225073233074	0.054937972388471396	1.8906355722850425
ECM11	ydj14xcga	0.2908174411986131	0.8284070769695275	1.3417492531691926
ECM11	apj1dsis14x	0.8276467622797589	0.5360354640819249	1.337461322677411
ECM11	apj1dydj14x	-0.32608915974615926	0.8100637649032375	1.356761435481551
DNF2	apj1d	0.2997732906837375	0.5652314541548075	0.5212646360880657
DNF2	sis14xcga	0.21066475885557776	0.6835131781533408	0.5167483440635804
DNF2	ydj14xcga	-0.1098802929938674	0.831833254584861	0.5174466914128493
DNF2	apj1dsis14x	0.14385512972448403	0.7844308168650934	0.5258832824438362
DNF2	apj1dydj14x	-0.12515276007274018	0.804581871783641	0.5058277160321532
YLR236C	apj1d	NA	NA	NA
YLR236C	sis14xcga	NA	NA	NA
YLR236C	ydj14xcga	NA	NA	NA
YLR236C	apj1dsis14x	NA	NA	NA
YLR236C	apj1dydj14x	NA	NA	NA
CIN10	apj1d	0.29131016298834006	0.5194498948543029	0.45220902387080647
CIN10	sis14xcga	0.31501255713773385	0.4788494738521875	0.4448360755814155
CIN10	ydj14xcga	0.2625626628629261	0.5500969062926897	0.4393509162881782
CIN10	apj1dsis14x	-0.15500584030291145	0.7397118954861028	0.46655496478475283
CIN10	apj1dydj14x	0.4074213121553388	0.34148606241507434	0.428308597427182
TAF2	apj1d	-0.7438756363513348	0.02781928895558335	0.3381521345090716
TAF2	sis14xcga	-0.6369198241225342	0.05665507472173358	0.33417227953745193
TAF2	ydj14xcga	-0.8112548615774172	0.0148894503480028	0.33315643652354676
TAF2	apj1dsis14x	-0.6309366540297364	0.06064463318167118	0.3363062775026466
TAF2	apj1dydj14x	-0.19923527583735445	0.5409036976229143	0.3258422673910391
FIR1	apj1d	-0.3885763742160512	0.37530315175805323	0.43828511452620017
FIR1	sis14xcga	-0.3039187251582297	0.4804123556743057	0.43069970814009323
FIR1	ydj14xcga	-0.8145225707763661	0.061725069130999954	0.4359779479157194
FIR1	apj1dsis14x	-0.2812364932721856	0.5176028884531201	0.43464757380392255
FIR1	apj1dydj14x	-0.3261818858536028	0.43611516517241694	0.41884234371596607
RPL24A	apj1d	0.5006025759164435	0.04033596073207899	0.24416161981035647
RPL24A	sis14xcga	0.36242389541920583	0.1377005270573801	0.24415371215118842
RPL24A	ydj14xcga	0.06691565870426666	0.7840318760879003	0.2441565720838662
RPL24A	apj1dsis14x	0.21753039491364778	0.37300414056926323	0.24418015254358277
RPL24A	apj1dydj14x	-0.38034850336524084	0.11927775777004973	0.24415554556043206
CTF13	apj1d	0.7020401873943297	0.30451255790938075	0.6837136260097986
CTF13	sis14xcga	-0.21882159585244662	0.7615898547992878	0.7212463672003696
CTF13	ydj14xcga	0.6945339844113678	0.296062855018421	0.6646807110282598
CTF13	apj1dsis14x	0.6153183792020824	0.3697446419963289	0.6860105359818225
CTF13	apj1dydj14x	0.11606597393172423	0.862320272860705	0.66927167903839
YDL144C	apj1d	0.11029509977888201	0.7420837724035858	0.335146539977465
YDL144C	sis14xcga	0.14904237887416702	0.6523304180519762	0.3308177883933416
YDL144C	ydj14xcga	0.40183813994722056	0.21680286471559257	0.32535544626884183
YDL144C	apj1dsis14x	0.08009161716307474	0.8108357406435066	0.33462412014749365
YDL144C	apj1dydj14x	0.7321205644570303	0.021894698736473053	0.3193978939549628
SAP4	apj1d	-0.41448371512453835	0.3757061056043643	0.467901380235882
SAP4	sis14xcga	-0.38566989510800603	0.40018690389557	0.4584281891156569
SAP4	ydj14xcga	0.016533179925699092	0.9700201571402688	0.43991105112794077
SAP4	apj1dsis14x	-0.1841164426654057	0.6878973355746096	0.4583315391599809
SAP4	apj1dydj14x	0.15993701615256317	0.7094899179396974	0.4293135950002713
PSF1	apj1d	0.7684262556767225	0.010231323746966024	0.29924170645450227
PSF1	sis14xcga	0.5456182566356208	0.06815133914647101	0.29913202089028584
PSF1	ydj14xcga	0.13726732029968347	0.6469231855671187	0.2996836609612552
PSF1	apj1dsis14x	0.5939858020148001	0.04744216471496582	0.29964001457598954
PSF1	apj1dydj14x	0.043599853822874346	0.8838720187252539	0.2985012728969554
CTP1	apj1d	0.3168000412038428	0.295597693511993	0.30289110075506426
CTP1	sis14xcga	0.17699265011738052	0.5575527980549347	0.30178788774295934
CTP1	ydj14xcga	0.4873918978710915	0.10118424301898395	0.29734622625466844
CTP1	apj1dsis14x	0.5427186616761438	0.07069670100093702	0.30027245267240865
CTP1	apj1dydj14x	0.32785928974405865	0.267297086150295	0.2955528303411014
JJJ3	apj1d	0.6151815388265798	0.03010120099756692	0.28365638766999374
JJJ3	sis14xcga	0.1802692089621225	0.5265708336892749	0.2846733493660117
JJJ3	ydj14xcga	-0.20483362036424796	0.47286919183206044	0.2853557191750147
JJJ3	apj1dsis14x	0.3124274244284232	0.27307894426626506	0.28506161955187737
JJJ3	apj1dydj14x	-0.28317569563252626	0.3176023804212383	0.28334653479923005
YER165C-A	apj1d	NA	NA	NA
YER165C-A	sis14xcga	NA	NA	NA
YER165C-A	ydj14xcga	NA	NA	NA
YER165C-A	apj1dsis14x	NA	NA	NA
YER165C-A	apj1dydj14x	NA	NA	NA
6	apj1d	0.9478437195263161	0.0024144958960124665	0.31242211114715457
6	sis14xcga	0.7011691435196892	0.024805024697995084	0.31240470314060054
6	ydj14xcga	0.25844930921261383	0.4083448273788011	0.312586139156331
6	apj1dsis14x	0.8941126398982348	0.004209620522025853	0.31240710899887236
6	apj1dydj14x	-0.22194133224493684	0.47769756756242454	0.3125887621702174
YMR244W	apj1d	0.6675250711216693	0.4357641080876352	0.8564974808679805
YMR244W	sis14xcga	1.0136038924602204	0.21771678288946972	0.8223151944704442
YMR244W	ydj14xcga	0.8421861214248275	0.30249544697833824	0.8167867012993468
YMR244W	apj1dsis14x	0.7523679039915945	0.37524676507367627	0.8485145735450332
YMR244W	apj1dydj14x	0.6552476535278537	0.41643469449610854	0.8063373688797109
ADE17	apj1d	0.11257112075540425	0.7273592604902124	0.3228860065425401
ADE17	sis14xcga	-0.21685309595847488	0.5018246480198252	0.32287988993253913
ADE17	ydj14xcga	0.9221237579054634	0.00394003280786475	0.3198571868515603
ADE17	apj1dsis14x	-0.3124795883477606	0.33479655221303534	0.3239817444196318
ADE17	apj1dydj14x	-0.15541991506479347	0.6280940283201916	0.3208429028578417
RPL42A	apj1d	1.0566169133662255	0.0014537395662078858	0.3318767430270388
RPL42A	sis14xcga	0.737115241054751	0.02634834489722125	0.3318786221516568
RPL42A	ydj14xcga	0.42932908430471883	0.1957969633355688	0.33188210365431864
RPL42A	apj1dsis14x	0.9293688132429656	0.005105097692664898	0.33187875979378684
RPL42A	apj1dydj14x	-0.15683164861927698	0.6365373261902953	0.33188672922749457
VAM3	apj1d	0.004868671464136337	0.9886578924593061	0.342485463505893
VAM3	sis14xcga	-0.1576662903090933	0.6444772472109241	0.3416772918335904
VAM3	ydj14xcga	-0.021541056807269914	0.9493541493679052	0.33913393431412964
VAM3	apj1dsis14x	-0.2926746177243949	0.395648503412314	0.3445588282205861
VAM3	apj1dydj14x	-0.4828651445101724	0.15441909096252543	0.3390681674907955
IES2	apj1d	-0.5720209720076146	0.07177570410433547	0.31769444572167754
IES2	sis14xcga	-0.428722145696704	0.17063817881664936	0.3129002204495084
IES2	ydj14xcga	-0.17279726695714934	0.575508438621861	0.3085899773542425
IES2	apj1dsis14x	-0.30200110469817293	0.3355888609899292	0.31363129621852065
IES2	apj1dydj14x	0.013992247765497637	0.96335830610354245	0.3045785167905355
NRD1	apj1d	-0.4977234734233931	0.370417192495244	0.5556858585020916
NRD1	sis14xcga	-0.788794979078185	0.15775705255480824	0.5583774666903483
NRD1	ydj14xcga	-0.6446282977060764	0.2329203305775223	0.5404011783937728
NRD1	apj1dsis14x	-0.8832768441754737	0.12367662754143875	0.5737340401220793
NRD1	apj1dydj14x	-0.928020482278394	0.08280649542186538	0.534996445555789
MBP1	apj1d	-0.4949558437964371	0.1565420412621898	0.3493482483085129
MBP1	sis14xcga	-0.37377305017070933	0.27333373743352196	0.34121512957194877
MBP1	ydj14xcga	-0.2639863521042467	0.4297695931698667	0.3343351523958996
MBP1	apj1dsis14x	-0.16282587191245707	0.6329702407528459	0.3409606021634264
MBP1	apj1dydj14x	-0.015324344473858945	0.9624461187350307	0.3254668016019182
MTQ1	apj1d	0.09072247338310806	0.8480801428568345	0.473576957879533
MTQ1	sis14xcga	0.07650274080016772	0.86976693970073915	0.46660949922024497
MTQ1	ydj14xcga	0.379280733939132	0.4037732073631421	0.4542820487996284
MTQ1	apj1dsis14x	0.14899699109241027	0.7512759749995211	0.4700853205743114
MTQ1	apj1dydj14x	0.5924010124905448	0.18183886722541936	0.44370801359892054
YOL163W	apj1d	-1.0618333687582642	0.3541751704458521	1.1460432170703698
YOL163W	sis14xcga	1.1138585216650654	0.19940796011943737	0.8680047439489598
YOL163W	ydj14xcga	1.951981197573196	0.018173197976008235	0.8263857501737314
YOL163W	apj1dsis14x	1.1160282384852167	0.2041627418803496	0.8789141308192178
YOL163W	apj1dydj14x	0.48514271043348756	0.5741194178347421	0.8632509193273346
FUS2	apj1d	0.826315340597823	0.24812498112500148	0.7154768056652788
FUS2	sis14xcga	-0.07159904322588974	0.9235779678518085	0.7463852264039624
FUS2	ydj14xcga	-0.5421267119132994	0.47362977480205815	0.756541355839136
FUS2	apj1dsis14x	0.6785505800295316	0.3460455648435441	0.7201100714095893
FUS2	apj1dydj14x	0.4992457829198065	0.47341447969055855	0.696361725046671
OSH7	apj1d	0.07524286052282551	0.7591889667468343	0.24545374011175547
OSH7	sis14xcga	0.13539843271668844	0.5788212021328647	0.2439139397860819
OSH7	ydj14xcga	0.402719092092772	0.09604458726924382	0.24196930559908955
OSH7	apj1dsis14x	-0.09098775583194403	0.7115931414194812	0.24610088904127433
OSH7	apj1dydj14x	0.0629629112047089	0.7943949053832665	0.2416001735978647
UBP13	apj1d	-0.8687578295346037	0.0033777776853590575	0.2963943820518359
UBP13	sis14xcga	-0.7470254433366712	0.01061653279009772	0.2923694350675237
UBP13	ydj14xcga	-0.455939029825698	0.11286580707912804	0.2875783883527718
UBP13	apj1dsis14x	-0.7741994768199356	0.008643976968487902	0.2948407016823115
UBP13	apj1dydj14x	-0.32741017676410306	0.2494644099745193	0.2842962876974655
PET112	apj1d	-0.5514498901199298	0.27006581226796805	0.4999949088309111
PET112	sis14xcga	-0.5551639474197922	0.2576811532795238	0.4904756606575635
PET112	ydj14xcga	0.4727849124111409	0.30023694523248534	0.456388955131923
PET112	apj1dsis14x	0.08691020995672687	0.8549673202815952	0.4754797962575388
PET112	apj1dydj14x	0.08725716068961084	0.8480003897062172	0.45524587269787425
UTR2	apj1d	-0.07252753458366817	0.7988888432616774	0.28466125312199897
UTR2	sis14xcga	-0.10587792927966141	0.7088292606274629	0.28352902517241674
UTR2	ydj14xcga	0.547148445456638	0.0510275122883564	0.2804094368696564
UTR2	apj1dsis14x	-0.15836754673408593	0.5781623599072917	0.2847973797779902
UTR2	apj1dydj14x	0.745904191504354	0.007516075446033591	0.27904410561200627
YPR096C	apj1d	NA	NA	NA
YPR096C	sis14xcga	NA	NA	NA
YPR096C	ydj14xcga	NA	NA	NA
YPR096C	apj1dsis14x	NA	NA	NA
YPR096C	apj1dydj14x	NA	NA	NA
VTS1	apj1d	-0.3847043954441264	0.3560089489339978	0.4167993391717196
VTS1	sis14xcga	-0.8749011538333448	0.03850692932637944	0.4227765398172171
VTS1	ydj14xcga	-0.8661713926479	0.03737954542827475	0.41610961654495277
VTS1	apj1dsis14x	-0.6129914004376771	0.14546680993360633	0.4210881791138122
VTS1	apj1dydj14x	-0.6406126000325175	0.11267788909824318	0.40384819083221046
FAA4	apj1d	-0.3696116477559245	0.3045534854581508	0.35999350522406065
FAA4	sis14xcga	-0.3697016869869449	0.3002394050888151	0.35688242356897804
FAA4	ydj14xcga	-0.893018509423268	0.013164704042020381	0.3601923363456051
FAA4	apj1dsis14x	-0.31856994125788934	0.37437003095660687	0.3586217420445215
FAA4	apj1dydj14x	-0.14478716288329083	0.6782362746490663	0.3489931365757868
FMP46	apj1d	0.7898415597588887	0.045886775705692495	0.3956263137394925
FMP46	sis14xcga	0.8379217215592659	0.03318095094548123	0.3934113670111605
FMP46	ydj14xcga	0.7208325624694129	0.06660762693180194	0.39297152563151105
FMP46	apj1dsis14x	1.4242712412431087	2.73639187530082e-4	0.3913847991583318
FMP46	apj1dydj14x	0.5933948721945138	0.12927071907402074	0.3911675172658191
GLO3	apj1d	-0.9458299030658398	0.0011715442860124818	0.2914084405013786
GLO3	sis14xcga	-1.057891235779259	2.6809334318887934e-4	0.2902844614876208
GLO3	ydj14xcga	-0.5805006975527983	0.042511184558307734	0.2861750782145957
GLO3	apj1dsis14x	-0.9889909294745639	6.846125009648638e-4	0.29125074021018377
GLO3	apj1dydj14x	-0.28624777910753785	0.3126346963284669	0.283495303717416
YCR018C-A	apj1d	1.2785490811914482	0.10459300505405672	0.7877771708552166
YCR018C-A	sis14xcga	0.33342770810710193	0.6853418010998164	0.8229031469265041
YCR018C-A	ydj14xcga	0.5826510806017599	0.46352785530234625	0.7948311544479424
YCR018C-A	apj1dsis14x	1.078717051644863	0.17471189868240156	0.794800036301144
YCR018C-A	apj1dydj14x	0.3450480811616252	0.6610607088745275	0.7869739621715435
CSM1	apj1d	-0.22715079556985496	0.4736975955263569	0.3170390271839735
CSM1	sis14xcga	-0.12390752072535861	0.6902279096341548	0.3108990804659068
CSM1	ydj14xcga	0.11932696753698162	0.695196215010708	0.30455062965450436
CSM1	apj1dsis14x	0.11187251519424173	0.718442864813464	0.3102909915569563
CSM1	apj1dydj14x	0.10483525823288646	0.7268774462969376	0.300144847423103
TRI1	apj1d	0.20438533592392066	0.44524249753992495	0.2677406962800645
TRI1	sis14xcga	0.16785083704183007	0.5284307037129521	0.2662594203818188
TRI1	ydj14xcga	-0.33546416085767716	0.21058195713150343	0.26794972312294846
TRI1	apj1dsis14x	0.16549076966393	0.5364854400142927	0.2677253334725488
TRI1	apj1dydj14x	-0.5417814512886402	0.04181781849704474	0.26618868645845006
MEO1	apj1d	1.2366065305829033	6.0329328577890324e-5	0.30826391204085873
MEO1	sis14xcga	1.1467642897816637	1.9634975206210244e-4	0.30796637851903197
MEO1	ydj14xcga	0.7926971796015793	0.01010374348078236	0.30817166928022266
MEO1	apj1dsis14x	1.2783427820589186	3.331800499071189e-5	0.3080703880338225
MEO1	apj1dydj14x	0.8219403159327607	0.007506321207415952	0.3074392571931448
CAN1	apj1d	-0.13500747056080536	0.7311128254594665	0.39286832057951987
CAN1	sis14xcga	-0.09277072102807565	0.8106791483244685	0.38727084111373705
CAN1	ydj14xcga	0.04723335461767427	0.9011050657185031	0.38010031860462723
CAN1	apj1dsis14x	-0.23292476532626583	0.5549042020710919	0.3945020144447001
CAN1	apj1dydj14x	1.051245568952052	0.004154209879163347	0.36677223348957466
YNR021W	apj1d	0.011267306147553531	0.9702450077515918	0.3020644484363944
YNR021W	sis14xcga	-0.06616914467062987	0.8259501413147486	0.3009075561650324
YNR021W	ydj14xcga	0.004580579051576187	0.9877688248810405	0.29879632346187524
YNR021W	apj1dsis14x	-0.322581097946832	0.2895348184678985	0.3045681313663403
YNR021W	apj1dydj14x	0.35088970775583495	0.23497992408912824	0.29545417401332946
YHL018W	apj1d	-0.9110040249047497	0.4270660822258302	1.1470392240712983
YHL018W	sis14xcga	-0.884068333971446	0.4292505003891479	1.1184015865532573
YHL018W	ydj14xcga	-0.09363546210919405	0.9277513566187171	1.0326566179705141
YHL018W	apj1dsis14x	-0.7692297764990003	0.49509949111882995	1.1275382375568568
YHL018W	apj1dydj14x	-0.32257031494359606	0.7525969649200261	1.0233280690186988
HO	apj1d	-0.5666452797975347	0.10486981329366987	0.34941659480783543
HO	sis14xcga	-0.654454113149269	0.06042964425962122	0.34855036798754696
HO	ydj14xcga	-0.8123514350913676	0.019646925338302555	0.3481968886445104
HO	apj1dsis14x	-0.7989992038452683	0.02256966381166341	0.35033966120696575
HO	apj1dydj14x	-1.1892318616276478	6.276653131468459e-4	0.34779277653043994
OCA2	apj1d	0.2564900261237842	0.30510446342998637	0.25010034293432304
OCA2	sis14xcga	0.3298396344242	0.1851909809834863	0.24894680569170993
OCA2	ydj14xcga	0.3134979484990881	0.20689582788787395	0.24838461895390557
OCA2	apj1dsis14x	0.401248090283848	0.10754740067315753	0.24932844027847495
OCA2	apj1dydj14x	0.15057302552485577	0.54317965582994	0.24764820115198985
CHA4	apj1d	0.21282073198782225	0.6402757342518545	0.45541337447535896
CHA4	sis14xcga	-0.44001662022987814	0.34800979529897313	0.4688726216471659
CHA4	ydj14xcga	0.0922847945960546	0.8359432217688235	0.4456365708063224
CHA4	apj1dsis14x	0.0327713044162347	0.9431870102649441	0.45985261806240724
CHA4	apj1dydj14x	0.11722780914483572	0.7885977818121683	0.43720200173486456
IDP1	apj1d	-0.27043580822859126	0.43472501382400586	0.34621023992922284
IDP1	sis14xcga	-0.29953103707182527	0.38194074923937804	0.34258507740123
IDP1	ydj14xcga	0.1399053362846878	0.6742426609430856	0.3328445392116502
IDP1	apj1dsis14x	-0.40835170596205517	0.2410870032154737	0.34834147207532024
IDP1	apj1dydj14x	-0.06693463542805829	0.8395392222347062	0.3305693177242835
1	apj1d	0.03145579087021641	0.9428953624227177	0.4391349678447669
1	sis14xcga	-0.07630600312372264	0.8610482290706786	0.43593474305651214
1	ydj14xcga	-0.24479690534977325	0.57223960941327	0.43345590498402337
1	apj1dsis14x	-0.12833403368552126	0.7717263901788427	0.44235200549256487
1	apj1dydj14x	0.34023321870177126	0.41453038330483916	0.41697949821522245
YKR040C	apj1d	-0.716450727462757	0.49061511778437333	1.0393423942422115
YKR040C	sis14xcga	-1.6855735765988988	0.1063335143568678	1.0437669061503316
YKR040C	ydj14xcga	-1.5876502375281527	0.1272939795324025	1.0411775939685135
YKR040C	apj1dsis14x	-1.0011549847251355	0.3360244284722324	1.0406474305042297
YKR040C	apj1dydj14x	-1.7602588357420603	0.09046374081078327	1.0397542990853605
MTC4	apj1d	0.11345427725575277	0.7771710010361895	0.4008877216884295
MTC4	sis14xcga	-0.005999697561121896	0.9879717747860536	0.3979709926203263
MTC4	ydj14xcga	0.014750763339842963	0.9699134791606829	0.39109262732113287
MTC4	apj1dsis14x	-0.3026277984614681	0.463035322317323	0.4123792645884532
MTC4	apj1dydj14x	0.10061576685594763	0.7922578724417146	0.3820178078138848
REC8	apj1d	1.8522476848911833	0.06831346456870738	1.0160807802010423
REC8	sis14xcga	0.5116615225044809	0.6394244147379329	1.0921183884143375
REC8	ydj14xcga	1.4295259143166574	0.15760145247531518	1.0115634654077714
REC8	apj1dsis14x	1.299293052970517	0.21387908143746165	1.0453137242266084
REC8	apj1dydj14x	0.3145797015574195	0.7643758565593097	1.0495102846596365
YDR327W	apj1d	NA	NA	NA
YDR327W	sis14xcga	NA	NA	NA
YDR327W	ydj14xcga	NA	NA	NA
YDR327W	apj1dsis14x	NA	NA	NA
YDR327W	apj1dydj14x	NA	NA	NA
GPI14	apj1d	-0.3296483006177148	0.3508803102753873	0.35336505484657893
GPI14	sis14xcga	0.21902864395420168	0.5177721046619103	0.33864293182767025
GPI14	ydj14xcga	0.4966974266620451	0.13458828812982107	0.3319613246402847
GPI14	apj1dsis14x	0.27450535533839715	0.4205758908951471	0.3408215474333794
GPI14	apj1dydj14x	0.5177026787129894	0.11437200123565926	0.3278999725442232
HOT1	apj1d	0.26958940162356576	0.4940152640947183	0.39417314533517483
HOT1	sis14xcga	-0.1136122185018868	0.7748960844364006	0.3972780972710198
HOT1	ydj14xcga	-0.31802923001333244	0.4216279305789771	0.395755558259106
HOT1	apj1dsis14x	0.22466614627961007	0.568635088121676	0.39410769579081284
HOT1	apj1dydj14x	-0.22579596028743842	0.5580810828965533	0.38551856795675754
YNL034W	apj1d	NA	NA	NA
YNL034W	sis14xcga	NA	NA	NA
YNL034W	ydj14xcga	NA	NA	NA
YNL034W	apj1dsis14x	NA	NA	NA
YNL034W	apj1dydj14x	NA	NA	NA
NTE1	apj1d	0.5367846792968942	0.16178048326730937	0.38366196969415395
NTE1	sis14xcga	0.03395923559860755	0.930382187403885	0.3887097359915497
NTE1	ydj14xcga	-0.45611846080678103	0.24570881131286168	0.3929225705974782
NTE1	apj1dsis14x	0.3809141878563722	0.32358620387141346	0.38588628444616185
NTE1	apj1dydj14x	0.23419425519645176	0.5319283926565539	0.3746718375276325
EXO1	apj1d	-0.2870765533177074	0.4453025563444028	0.37611416468959435
EXO1	sis14xcga	-0.9318408219266882	0.015977776445417986	0.3867485714331521
EXO1	ydj14xcga	-0.4785331963601815	0.19520892178411742	0.3694316372671649
EXO1	apj1dsis14x	-0.5604750729020144	0.14221480710437093	0.3819008867099547
EXO1	apj1dydj14x	-0.26861258584896835	0.45494974172744024	0.35949771735219954
RKM1	apj1d	-0.5427166315642127	0.08763853839888351	0.3177519859406629
RKM1	sis14xcga	-0.7344562560315344	0.02046795136363522	0.31689596392173197
RKM1	ydj14xcga	-0.4649002458583798	0.13160711370470787	0.30833129178417246
RKM1	apj1dsis14x	-0.5336922310167518	0.09211898858261044	0.3168583349149042
RKM1	apj1dydj14x	-0.3418431422109476	0.25780827675944373	0.3020918969263172
MSI1	apj1d	-0.9284372735727839	0.005724659876739242	0.3360069325517241
MSI1	sis14xcga	-0.7138428262856236	0.028968373330864782	0.32686358536508164
MSI1	ydj14xcga	-0.21859487513071738	0.4901171476346994	0.3167479273563082
MSI1	apj1dsis14x	-0.6690313679616257	0.0423800135853043	0.32960959082472324
MSI1	apj1dydj14x	-0.1851597663758016	0.553215952649867	0.31226982153478905
PDR10	apj1d	-0.31894284169836185	0.40779509971353295	0.38529903998090126
PDR10	sis14xcga	-0.24282412121967178	0.5206395789078415	0.378018848512601
PDR10	ydj14xcga	-0.177458515786524	0.6322000962188588	0.37076152842796084
PDR10	apj1dsis14x	-0.2665228633416015	0.4868926267795406	0.3833429453340313
PDR10	apj1dydj14x	-0.4344856201254405	0.23764971060575543	0.3679332226846077
POM33	apj1d	0.3764089832569181	0.2675597541515713	0.33950490420063345
POM33	sis14xcga	0.25623498562238695	0.44827572504952967	0.3379103565003397
POM33	ydj14xcga	0.143141979333094	0.6705980072137521	0.3365453823864745
POM33	apj1dsis14x	0.42595289159427	0.20786746233925935	0.3382051994525031
POM33	apj1dydj14x	-0.12926234874566991	0.6993627397851219	0.33471973244669384
YAL016C-A	apj1d	NA	NA	NA
YAL016C-A	sis14xcga	NA	NA	NA
YAL016C-A	ydj14xcga	NA	NA	NA
YAL016C-A	apj1dsis14x	NA	NA	NA
YAL016C-A	apj1dydj14x	NA	NA	NA
FAP1	apj1d	-0.3545548823000957	0.3409548620707994	0.3723219876739091
FAP1	sis14xcga	-0.4650617247405083	0.20853827009814865	0.3698024661792613
FAP1	ydj14xcga	-0.7019285694779052	0.05685117797251688	0.36857222119512983
FAP1	apj1dsis14x	-0.361980486353693	0.33039396829546525	0.37190261067434055
FAP1	apj1dydj14x	-0.33037433698528756	0.3533185506692297	0.35594100063254996
MSO1	apj1d	0.01564776249729548	0.9688362834447161	0.4005277359507514
MSO1	sis14xcga	-0.06817939856731181	0.8634013442739363	0.39628580691921583
MSO1	ydj14xcga	0.5854675785738949	0.12304515611836557	0.379651845713183
MSO1	apj1dsis14x	0.06672544047765823	0.8667984009510723	0.3978227466909799
MSO1	apj1dydj14x	0.4735155642415848	0.2070195611383594	0.3752689110616403
IPT1	apj1d	0.10628160238229482	0.753970435123549	0.3391154054463528
IPT1	sis14xcga	0.11777845564211001	0.7261896489848059	0.3363190255096869
IPT1	ydj14xcga	-0.20427294701308132	0.5442064652368827	0.3368259906526083
IPT1	apj1dsis14x	-0.13978347223141438	0.6825544341892249	0.34178570297893285
IPT1	apj1dydj14x	0.4149023790259351	0.20693105071556012	0.32875291187371736
EFT1	apj1d	-0.711158528269933	0.003170326740806381	0.24101174485631785
EFT1	sis14xcga	-0.6054527068479422	0.011937326788435657	0.2408332232614643
EFT1	ydj14xcga	-0.36698650544783695	0.12731078718344252	0.24067959021787316
EFT1	apj1dsis14x	-0.9191148788559046	1.3754930304608266e-4	0.2410771628361201
EFT1	apj1dydj14x	-0.18414821161464615	0.4439011223601404	0.2405209880712842
YIL029C	apj1d	0.8439252322550009	0.04350262075600219	0.41802237003335097
YIL029C	sis14xcga	0.5496927687945902	0.18967510007575417	0.41911982113442875
YIL029C	ydj14xcga	0.27626956549897697	0.509675362156447	0.4190071816745856
YIL029C	apj1dsis14x	0.8695935764807597	0.036940773459169116	0.41678779863862286
YIL029C	apj1dydj14x	0.44846865118195184	0.2727710717793348	0.40892428448789064
NDD1	apj1d	-0.514276858786291	0.3830559205145994	0.5895780665865868
NDD1	sis14xcga	-1.0805445209764204	0.07526472218301772	0.607440690641728
NDD1	ydj14xcga	-0.9885574733518244	0.092331186635635	0.5872990194591609
NDD1	apj1dsis14x	-0.44446353474698247	0.4470302236945472	0.5845317128245183
NDD1	apj1dydj14x	-0.29639066489689087	0.589377451170729	0.5491376242331708
IPL1	apj1d	-0.5300411604151857	0.5177641424193914	0.8194876964504574
IPL1	sis14xcga	-0.752998906690399	0.3578887909400256	0.8190153019339687
IPL1	ydj14xcga	-1.3593443938235934	0.10632029798675895	0.8417224262212373
IPL1	apj1dsis14x	-1.9528735774510324	0.04291132828614111	0.9645858701649281
IPL1	apj1dydj14x	-0.805190384848456	0.3032352233411575	0.782102448871907
YJR124C	apj1d	0.10641135924176673	0.7609010353504669	0.3496948245790005
YJR124C	sis14xcga	0.33511621701307337	0.3304858809773011	0.34436741911631596
YJR124C	ydj14xcga	0.3131790839567534	0.36012717065681416	0.34222629628717244
YJR124C	apj1dsis14x	-0.18922468813784324	0.59222350105931	0.35328378773125707
YJR124C	apj1dydj14x	0.6027872797139341	0.07403844093909041	0.33743588552322185
KEI1	apj1d	0.46079363896649245	0.1158245878514059	0.2930244379847681
KEI1	sis14xcga	0.6584033594571268	0.02370960593157778	0.2910967461348375
KEI1	ydj14xcga	0.07603416880587723	0.7948442514439452	0.29241064730788896
KEI1	apj1dsis14x	0.2770823104787207	0.3456138751846181	0.29378982939470827
KEI1	apj1dydj14x	0.21234849780133205	0.46425543563113036	0.2901499868166528
PSK1	apj1d	-0.19724776479910472	0.6426115995374884	0.42505672390004795
PSK1	sis14xcga	0.15249256372922335	0.710317905808203	0.41055624563649884
PSK1	ydj14xcga	-0.7244340259210567	0.08845199340767357	0.4252320221827369
PSK1	apj1dsis14x	0.1740788652804827	0.6744202329195612	0.4143854013249174
PSK1	apj1dydj14x	0.14965426890014563	0.7075190248656635	0.3988757504081777
PMA2	apj1d	1.091312337183333	0.019680716238749424	0.4678964829714428
PMA2	sis14xcga	1.2540769917483414	0.0065029277699654425	0.4608405271505828
PMA2	ydj14xcga	1.5119093566850297	8.598801090194231e-4	0.4536503624274277
PMA2	apj1dsis14x	0.9793468665922108	0.03702952511177158	0.46961198712825036
PMA2	apj1dydj14x	2.0039326050253226	7.033406524201957e-6	0.4460444135936723
SUP35	apj1d	-0.60263687515467	0.04469547882758836	0.3001913487360941
SUP35	sis14xcga	-1.2197161848960127	5.940621199190523e-5	0.3037779483231098
SUP35	ydj14xcga	-0.8815058738695914	0.0031352499844145656	0.2983951199005161
SUP35	apj1dsis14x	-0.6188781566469608	0.03913495567491269	0.3000235801047466
SUP35	apj1dydj14x	-0.4788835530454361	0.10312424104369307	0.2938129868086543
OSH2	apj1d	-0.12266373025882027	0.7724293545202856	0.42415040497943085
OSH2	sis14xcga	-0.5754469183397249	0.18151737660236827	0.4306922797374691
OSH2	ydj14xcga	-0.2984017212393423	0.4727024330968156	0.41554979303509887
OSH2	apj1dsis14x	-0.11868987531786256	0.7790295143267152	0.4230101825700947
OSH2	apj1dydj14x	-0.04634910619711281	0.9084120557019507	0.4028895532828084
OCA6	apj1d	0.4883313238370007	0.07363363692581823	0.27298111976038475
OCA6	sis14xcga	0.4255445680854806	0.11767317708652351	0.27198034685042616
OCA6	ydj14xcga	0.14089123181180488	0.6047337398804007	0.2721982443614459
OCA6	apj1dsis14x	0.39415931023125667	0.14900470088015288	0.27314207783092
OCA6	apj1dydj14x	-0.053061680254048574	0.8447564348883532	0.2709812206603291
MSB3	apj1d	-0.37563368956286836	0.2978954253775694	0.3608541249151731
MSB3	sis14xcga	-0.3858540334562804	0.2781768015112481	0.3558146967518307
MSB3	ydj14xcga	-0.5425717203671345	0.12483741165914415	0.3535171494981595
MSB3	apj1dsis14x	-0.1608892400895288	0.6506466265987696	0.35527049212386397
MSB3	apj1dydj14x	-0.3135909768327258	0.3608087595134942	0.3431630184108162
GON7	apj1d	0.6727787456544145	0.015556259614296556	0.27810391170205256
GON7	sis14xcga	0.796722051986222	0.00404873596417177	0.2771844016439997
GON7	ydj14xcga	0.46900839400080885	0.09090233344394945	0.2774119156055779
GON7	apj1dsis14x	0.7286142638736476	0.008712202525257125	0.27776355862953844
GON7	apj1dydj14x	0.05429625923889153	0.8447475002053063	0.27726994113921627
UMP1	apj1d	0.3308962369043131	0.2195247190145829	0.2695049262985372
UMP1	sis14xcga	0.5288603276952969	0.049024585312881286	0.26867826395620675
UMP1	ydj14xcga	0.24954832999852386	0.35317748272261923	0.2687813404378353
UMP1	apj1dsis14x	0.27380599608129097	0.30954747406365996	0.26944846787158383
UMP1	apj1dydj14x	-0.14962689082916464	0.5775570750620813	0.26865089329275726
CHL1	apj1d	-0.6093403716039154	0.059568589487516616	0.3234336586545822
CHL1	sis14xcga	-0.5737090041695547	0.07252528800732146	0.3194714947669615
CHL1	ydj14xcga	-0.37831496285196575	0.2288061764947384	0.31436135385827374
CHL1	apj1dsis14x	-0.5739104257745369	0.07489013193765647	0.32221583345364296
CHL1	apj1dydj14x	-0.24725698322454642	0.42467491225856824	0.3097150225868156
RMR1	apj1d	0.9834135964122507	0.005393307433808967	0.3534213495149298
RMR1	sis14xcga	0.9486297224611727	0.0067745004954931866	0.3503412599521656
RMR1	ydj14xcga	0.6429354957243655	0.06705777338829383	0.35108403459911885
RMR1	apj1dsis14x	1.2652036633705004	2.868178786210459e-4	0.34883657039505617
RMR1	apj1dydj14x	0.49700305274392403	0.15238730146762872	0.3472753655826024
CST26	apj1d	0.3131747671216355	0.22226633250338634	0.2565904407147131
CST26	sis14xcga	0.4971494632837288	0.050374437231045364	0.25406628975751694
CST26	ydj14xcga	0.18736079716442344	0.46110451092266425	0.2542107736511812
CST26	apj1dsis14x	-0.060763694814613696	0.8146948627118314	0.259259852520071
CST26	apj1dydj14x	0.11411010599866171	0.6512731726563628	0.2524592354452859
YBR085C-A	apj1d	0.9086565851106154	0.008425065370189125	0.34490103817353995
YBR085C-A	sis14xcga	0.7056091115343583	0.0406781099403926	0.3447383526229804
YBR085C-A	ydj14xcga	0.7061789695370025	0.040246943692004024	0.3442751044818348
YBR085C-A	apj1dsis14x	1.1335932372361335	9.915142993359312e-4	0.3442513071031704
YBR085C-A	apj1dydj14x	1.0588285351698272	0.0020246581500602124	0.3430413877990757
TGL5	apj1d	-0.022513904859618152	0.9636253285184995	0.49367517534879896
TGL5	sis14xcga	-0.732457896786936	0.15182689419306294	0.5110973850163238
TGL5	ydj14xcga	-1.0526998000751937	0.03995776082687257	0.5124658428859957
TGL5	apj1dsis14x	0.06599128746067148	0.8927847501140065	0.4896173424982097
TGL5	apj1dydj14x	-0.2601123003004957	0.584126029670659	0.4752056489341112
YMC2	apj1d	0.36261563001254693	0.15087185350984075	0.2524372082706461
YMC2	sis14xcga	0.22381030236988023	0.3748834770695386	0.2522195459758921
YMC2	ydj14xcga	0.036391702641597315	0.8851985218575079	0.2520508397532817
YMC2	apj1dsis14x	0.05622802891841504	0.824187198842681	0.253093876282283
YMC2	apj1dydj14x	-0.6389926700682885	0.011394004630409585	0.2525286490665381
NEL1	apj1d	0.1910561285925669	0.669927328456895	0.4482278902483086
NEL1	sis14xcga	0.40212579795365777	0.35990259664540436	0.43921739776458085
NEL1	ydj14xcga	-0.005162574329506815	0.9906722570957401	0.44159070038386233
NEL1	apj1dsis14x	-0.27010019064493374	0.5566005060977951	0.459433469015446
NEL1	apj1dydj14x	-0.21994729514163028	0.6152181860921004	0.4375851179239271
YJL043W	apj1d	NA	NA	NA
YJL043W	sis14xcga	NA	NA	NA
YJL043W	ydj14xcga	NA	NA	NA
YJL043W	apj1dsis14x	NA	NA	NA
YJL043W	apj1dydj14x	NA	NA	NA
FDC1	apj1d	-0.6021602701853577	0.0871942040988965	0.3520606879822767
FDC1	sis14xcga	-0.1371444490584332	0.6838567506572621	0.3367938451196621
FDC1	ydj14xcga	-0.25533728799337907	0.4450618561035364	0.3343540124642778
FDC1	apj1dsis14x	0.11428268921220049	0.7336718939627673	0.33588334129714914
FDC1	apj1dydj14x	-0.1693103300884381	0.6049266784248317	0.3272780136208181
YPT52	apj1d	0.22393019150249246	0.36206352981166534	0.24568832327552417
YPT52	sis14xcga	0.3174153563549775	0.19467577024295427	0.24475487105470164
YPT52	ydj14xcga	0.3986685164526497	0.10232040137396754	0.2440269474086013
YPT52	apj1dsis14x	-0.05587561975377208	0.8206393274677043	0.24644909749009905
YPT52	apj1dydj14x	0.1787966236032349	0.4629642323942165	0.24360056747720357
MGR1	apj1d	-0.2179524600014289	0.772503568095946	0.7538955155252302
MGR1	sis14xcga	-0.0949527474437715	0.8969741209585886	0.7333124179878039
MGR1	ydj14xcga	0.5483677497012991	0.43161915066509643	0.6972927799288668
MGR1	apj1dsis14x	-0.33222472163519046	0.6616914698205314	0.75923363143553535
MGR1	apj1dydj14x	-0.011752202329267986	0.9866182984983087	0.7006927465273295
GPI10	apj1d	0.19527280936505023	0.5124057323665631	0.2980825861470662
GPI10	sis14xcga	0.46545721461351125	0.11175773124070562	0.29267742914151296
GPI10	ydj14xcga	0.3781066674968089	0.1940078924092088	0.2911169514992825
GPI10	apj1dsis14x	0.2518970578877259	0.39625129923754404	0.2969310327900972
GPI10	apj1dydj14x	0.3854629779088948	0.1807732646123111	0.288007568617396
DOT5	apj1d	-0.25532025005879205	0.48945725051472444	0.36940172387026804
DOT5	sis14xcga	0.002261353805424633	0.9949496417246941	0.3572592559247012
DOT5	ydj14xcga	0.2527848551646192	0.46796791593249654	0.3482895618385973
DOT5	apj1dsis14x	0.056728584262334604	0.8749144846810706	0.36036636682142154
DOT5	apj1dydj14x	0.4732347823243729	0.16406114989682755	0.3400794237638381
APL4	apj1d	-1.05906942841711	0.001873072868460456	0.3405748001727924
APL4	sis14xcga	-0.864159896493077	0.01024789723076473	0.33659599680770724
APL4	ydj14xcga	-0.33139703873435356	0.3178730656231163	0.33178249540479876
APL4	apj1dsis14x	-0.8071362158427146	0.016863914630996464	0.3377617570745456
APL4	apj1dydj14x	-0.08854874884457316	0.7879657070088457	0.3292348003924645
YBR121C-A	apj1d	-0.5479623903071703	0.0952077735715599	0.3284075046328434
YBR121C-A	sis14xcga	-0.2659094316878729	0.41225311917368607	0.3243054715582309
YBR121C-A	ydj14xcga	-0.12619625605235177	0.6952134582490244	0.3221018612784112
YBR121C-A	apj1dsis14x	-0.7487547126753695	0.023205567825130176	0.32984306470536245
YBR121C-A	apj1dydj14x	-0.28896483942791146	0.36766529325011316	0.3207672299938928
YPR071W	apj1d	0.3564425563801968	0.30647762109984034	0.348551016024015
YPR071W	sis14xcga	0.5030821460589621	0.14353300607528827	0.34392660175364614
YPR071W	ydj14xcga	0.4106024817528081	0.23010498056675396	0.3421435084870844
YPR071W	apj1dsis14x	-0.05027668640833439	0.8871215622895798	0.35419240028207605
YPR071W	apj1dydj14x	0.10898357819486242	0.7491556584958363	0.34083687696628734
YFR006W	apj1d	-1.24549253536607	2.259222131852563e-4	0.3377044343170804
YFR006W	sis14xcga	-0.8247913089350791	0.013494463686024354	0.3338633028654366
YFR006W	ydj14xcga	-0.49788354420223185	0.13341459422084814	0.331751664949859
YFR006W	apj1dsis14x	-0.5099200325852502	0.12610283811036568	0.3333568430674002
YFR006W	apj1dydj14x	-0.12116588082463518	0.7133280148668862	0.3298016550177406
YPL222C-A	apj1d	NA	NA	NA
YPL222C-A	sis14xcga	NA	NA	NA
YPL222C-A	ydj14xcga	NA	NA	NA
YPL222C-A	apj1dsis14x	NA	NA	NA
YPL222C-A	apj1dydj14x	NA	NA	NA
APE4	apj1d	-0.23726893573355917	0.49601314077270936	0.3485270955192606
APE4	sis14xcga	-0.26155576374523476	0.4501887240995255	0.34638539818362496
APE4	ydj14xcga	0.1909565509561707	0.576555589866637	0.3419568329351318
APE4	apj1dsis14x	-0.24437153611066526	0.48245343624145826	0.34792818472150433
APE4	apj1dydj14x	0.09824338020784686	0.7727507739391204	0.34020306357057695
BSC1	apj1d	NA	NA	NA
BSC1	sis14xcga	NA	NA	NA
BSC1	ydj14xcga	NA	NA	NA
BSC1	apj1dsis14x	NA	NA	NA
BSC1	apj1dydj14x	NA	NA	NA
YLR446W	apj1d	0.9681346300079005	0.14847210986199155	0.6700128432573287
YLR446W	sis14xcga	0.5788228237087775	0.3923202601753369	0.6766556328198459
YLR446W	ydj14xcga	-0.16714497060329495	0.8112642711276166	0.6999506737150553
YLR446W	apj1dsis14x	0.9668373324482548	0.14819697056090414	0.6686614511538542
YLR446W	apj1dydj14x	0.31948495380837355	0.6276425845899261	0.6586672263946391
YMR119W-A	apj1d	0.1782715096644556	0.6264064144118582	0.3662177234520054
YMR119W-A	sis14xcga	0.3492286589129799	0.33122220785494516	0.3594163121682549
YMR119W-A	ydj14xcga	-0.1349693182004951	0.7095155120528474	0.3623270762017909
YMR119W-A	apj1dsis14x	-0.06665678510540946	0.8573889141539003	0.3709358534410116
YMR119W-A	apj1dydj14x	0.1319484303006881	0.7083664999913815	0.35275534742148523
YPT31	apj1d	0.1279786841484684	0.6533610002320556	0.28496831159502517
YPT31	sis14xcga	0.36834178544857804	0.19501229582912766	0.2842377725253364
YPT31	ydj14xcga	0.30310523057621747	0.2859801507334008	0.2840772833350296
YPT31	apj1dsis14x	0.034750466142640504	0.9029469544923441	0.2849812737944145
YPT31	apj1dydj14x	0.08996645960129702	0.7512495209422718	0.28381284983766614
EPO1	apj1d	-0.240156134734818	0.5607162197984941	0.4127968603331441
EPO1	sis14xcga	-0.34802873135352985	0.39555623351084357	0.4096458984016579
EPO1	ydj14xcga	-0.6111435871930025	0.13547498481946893	0.4093788975952042
EPO1	apj1dsis14x	-0.09698828883324961	0.8123082024125494	0.4084588383038837
EPO1	apj1dydj14x	-0.07969201483208427	0.8393148695337523	0.3930169458126799
DXO1	apj1d	-0.30868544142730286	0.2059053820502215	0.24403843732581612
DXO1	sis14xcga	-0.267870632699129	0.26860529587957876	0.24213635323570915
DXO1	ydj14xcga	-0.256646409385312	0.2862876508946485	0.24068854644238435
DXO1	apj1dsis14x	-0.46730066606351583	0.05631765647093147	0.24484341758994552
DXO1	apj1dydj14x	-0.33450729155896913	0.16165755715042326	0.23901598555270967
HBT1	apj1d	0.4494755973846954	0.5059452665757656	0.6757359709472808
HBT1	sis14xcga	-0.6339346140199337	0.37917027467828734	0.7208503356116648
HBT1	ydj14xcga	-0.6529900217466363	0.3532576702008092	0.7034339634570143
HBT1	apj1dsis14x	-0.16873948910450245	0.8106286049308553	0.7042103824838478
HBT1	apj1dydj14x	-0.7192303686765756	0.29368118676691	0.6849289107301273
THI7	apj1d	-0.1613386622600788	0.7652956469726839	0.54043651348454
THI7	sis14xcga	-0.2344690935482137	0.6604227631894554	0.5336975211154622
THI7	ydj14xcga	0.03396161255065709	0.94729885400858	0.513797694649582
THI7	apj1dsis14x	0.10232661649160832	0.8463932227087498	0.5282125201733597
THI7	apj1dydj14x	0.3464238108543474	0.4853163656768266	0.49646745775267087
DBF20	apj1d	-0.8812955257748423	0.10368990688402563	0.5415950609085964
DBF20	sis14xcga	-0.6648909106776536	0.20304501782774848	0.5223335559987065
DBF20	ydj14xcga	-0.25715913795504464	0.6082601021688068	0.5017165369513489
DBF20	apj1dsis14x	-0.5889192125259874	0.263854929272784	0.5270790901577496
DBF20	apj1dydj14x	0.04066384930670266	0.9335153290002606	0.4874426457958115
DMA1	apj1d	-0.3377766929779182	0.3256233025454816	0.34362946989395526
DMA1	sis14xcga	-0.12122061381959352	0.718087226954002	0.33577596931788783
DMA1	ydj14xcga	-0.1749660935133281	0.5991718632471508	0.3328935065461421
DMA1	apj1dsis14x	0.03799153834363127	0.9100691907956544	0.33635336011816197
DMA1	apj1dydj14x	0.19135007048573624	0.5557534010949043	0.3247841096890022
APM4	apj1d	-0.3247274893532183	0.16035576848551022	0.23130780946731735
APM4	sis14xcga	-0.1905308534556509	0.4062029831632604	0.22939105785553018
APM4	ydj14xcga	-0.02934072361899785	0.8975412153092099	0.2278572336140328
APM4	apj1dsis14x	-0.20711498180349655	0.3686555506430278	0.23038512992042315
APM4	apj1dydj14x	-0.1944910184562152	0.3914906750398052	0.2269659545234356
ISU1	apj1d	0.3715096390144855	0.15940155501058717	0.26402745931961935
ISU1	sis14xcga	0.5945126557976672	0.023600181958646486	0.26264307273090426
ISU1	ydj14xcga	0.4253626111679605	0.10516356117280544	0.2625176625087494
ISU1	apj1dsis14x	0.8251003332533996	0.0016750469179029025	0.26256073550497094
ISU1	apj1dydj14x	0.16156576265693018	0.5375539024703202	0.2620624896320646
SSN2	apj1d	0.5939997865064439	0.400633800343824	0.7067304849655115
SSN2	sis14xcga	0.691181206174984	0.31819569273379084	0.6924466148723764
SSN2	ydj14xcga	0.5193579879960881	0.45062458149140444	0.6884620572768172
SSN2	apj1dsis14x	0.833347143820109	0.2302752031125315	0.6946584186848749
SSN2	apj1dydj14x	0.6181406301779376	0.3577102838776396	0.6720842175744177
RSM24	apj1d	-0.6861195324577037	0.05561872491544774	0.35847205757210365
RSM24	sis14xcga	-0.5773318132504863	0.10334615827173313	0.35444278195561824
RSM24	ydj14xcga	-0.018829938493043034	0.956929096896988	0.34865339559863456
RSM24	apj1dsis14x	-0.37599504169907794	0.28869900708098944	0.35438467709067906
RSM24	apj1dydj14x	-0.4578190959268657	0.18886415283866206	0.3484305015127611
ADE3	apj1d	-0.03641202831806696	0.910061540092735	0.32234182494656566
ADE3	sis14xcga	-0.2691214789510989	0.40325753098741585	0.32198590114701503
ADE3	ydj14xcga	-0.6520777883617253	0.043814606929678666	0.3234737313750813
ADE3	apj1dsis14x	0.01930103964009837	0.9520754615825352	0.32114520106492456
ADE3	apj1dydj14x	-0.35735354229214356	0.2601373251849607	0.31734671693770095
PET117	apj1d	0.6227433346258675	0.08719096539517203	0.36409110853623977
PET117	sis14xcga	0.7641605143304887	0.034097592354917126	0.3606375262461884
PET117	ydj14xcga	0.3339290118452463	0.35674168159928754	0.3623395000292917
PET117	apj1dsis14x	0.9832659941582569	0.0063744526108847266	0.3604517900709269
PET117	apj1dydj14x	-0.05189050589272029	0.8858742314807491	0.3615390614173798
YOR342C	apj1d	-0.4615616109423625	0.0885131884320051	0.27098186973641825
YOR342C	sis14xcga	-0.48047524459353136	0.07377143452696772	0.2687179123189444
YOR342C	ydj14xcga	-0.22321011193347995	0.3997319925739133	0.26506367092329586
YOR342C	apj1dsis14x	-0.5122533271572485	0.05859482957894595	0.27085850217306146
YOR342C	apj1dydj14x	-0.23238436992375877	0.37614874129771536	0.2625768685349961
FIT3	apj1d	-1.7860653829413347	1.3304027787863092e-5	0.4101142125621035
FIT3	sis14xcga	-0.08128743439899301	0.8366126337939174	0.39416248962086514
FIT3	ydj14xcga	-1.0093205173223438	0.011056766688297014	0.3972295953678509
FIT3	apj1dsis14x	-0.1880642732036163	0.6344943505607781	0.39558284716688336
FIT3	apj1dydj14x	-3.118282685311122	7.115841156558717e-14	0.41656441529581234
NOC3	apj1d	-1.1179745943047013	7.980404366361498e-4	0.33337808719745166
NOC3	sis14xcga	-1.1761344709042905	4.0000761752260073e-4	0.33223398296207896
NOC3	ydj14xcga	-0.603872273633086	0.06633796710624985	0.32888261660666673
NOC3	apj1dsis14x	-1.3511144384063085	5.364848917884523e-5	0.3345058177308613
NOC3	apj1dydj14x	-0.8385020556008612	0.010626511692337061	0.32821339085432344
YJR087W	apj1d	0.31215356837649444	0.4300214662014272	0.39555423212217034
YJR087W	sis14xcga	-0.024438531499318922	0.9509462816275982	0.397254997973106
YJR087W	ydj14xcga	-0.6940936400929666	0.08775314978948094	0.40652776216919173
YJR087W	apj1dsis14x	-0.5287161790565668	0.2030159798265486	0.4153289596104584
YJR087W	apj1dydj14x	-0.7206037379589109	0.06944089929855618	0.3969086711898002
MID1	apj1d	-0.15120555777780917	0.7375900005562849	0.4512972154361208
MID1	sis14xcga	-0.03376058133476223	0.9390469405343399	0.4415006934149301
MID1	ydj14xcga	-0.10419234848137973	0.8113026673183371	0.43641534203825066
MID1	apj1dsis14x	0.07773235671556081	0.8609530526201394	0.443776377957322
MID1	apj1dydj14x	0.5040201959453373	0.2299206445004986	0.4198197596810935
SWC4	apj1d	-0.12747059911649866	0.7689687271595802	0.43398071008553724
SWC4	sis14xcga	-0.37217087090229856	0.39121739800086885	0.4340632077984853
SWC4	ydj14xcga	0.11365934403517311	0.7848769132851354	0.4163816129455731
SWC4	apj1dsis14x	-0.6265091148627152	0.1634687404312012	0.4495940127787905
SWC4	apj1dydj14x	0.014919996406766957	0.9710084366271668	0.410526830825878
YIL156W-A	apj1d	1.6059115164562685	0.005184975172213795	0.5745018390773629
YIL156W-A	sis14xcga	1.273390035701747	0.027348412174908875	0.5771063226014473
YIL156W-A	ydj14xcga	1.205389985220047	0.034891476855567295	0.5713789599630275
YIL156W-A	apj1dsis14x	1.732878579565727	0.0023547938259041584	0.5697631249795976
YIL156W-A	apj1dydj14x	0.7750347928394677	0.1746287116915742	0.5709363928923691
RMI1	apj1d	0.34074938288911344	0.22178929250173596	0.278894929136303
RMI1	sis14xcga	0.5021731375504908	0.06812240278873065	0.2752845958604503
RMI1	ydj14xcga	0.06782658553631238	0.8063593030321423	0.27670153158343525
RMI1	apj1dsis14x	0.5688057304043121	0.03955633187577836	0.27634032530068564
RMI1	apj1dydj14x	0.11094810385269184	0.684501957527468	0.2730509127378556
PSY4	apj1d	-0.35974007419258985	0.2786211813655931	0.3320406027567141
PSY4	sis14xcga	-0.5669987332368625	0.0870101872588823	0.3313099939112024
PSY4	ydj14xcga	-0.07375977656676572	0.8193904456509933	0.32304158383754306
PSY4	apj1dsis14x	-0.5039977221248153	0.13049282108946242	0.333296260055868
PSY4	apj1dydj14x	-0.004625567554446325	0.9884324005091453	0.3190410980244868
YHR073W-A	apj1d	NA	NA	NA
YHR073W-A	sis14xcga	NA	NA	NA
YHR073W-A	ydj14xcga	NA	NA	NA
YHR073W-A	apj1dsis14x	NA	NA	NA
YHR073W-A	apj1dydj14x	NA	NA	NA
YET1	apj1d	0.5829361131740396	0.028515953228723707	0.2661669899678792
YET1	sis14xcga	0.8587585170748279	0.001192424061984397	0.26499280960697136
YET1	ydj14xcga	0.33342130457865543	0.2092945227010761	0.26556691806264604
YET1	apj1dsis14x	0.5894586278977104	0.026683420628520076	0.26598702025415766
YET1	apj1dydj14x	0.24884121741967247	0.34739225816439784	0.2648206333409573
MRPL50	apj1d	0.5006644795933388	0.11768327191944286	0.32000089697462863
MRPL50	sis14xcga	0.6172162475132436	0.0530803550317015	0.31909574458198925
MRPL50	ydj14xcga	0.28733480299890646	0.36821267468640956	0.3193225073007315
MRPL50	apj1dsis14x	0.8473585363262942	0.00790542258695206	0.3190256605211258
MRPL50	apj1dydj14x	-0.5133185898954447	0.10880689729240235	0.3201080901201247
ATX2	apj1d	0.41913905023698805	0.21314965939816793	0.3366710464184606
ATX2	sis14xcga	0.6151149895095274	0.06550278462338453	0.3339728958672076
ATX2	ydj14xcga	-0.2195119559377386	0.5155502167251574	0.3375965126274109
ATX2	apj1dsis14x	0.3984214793518026	0.2365395087700369	0.33659542000701004
ATX2	apj1dydj14x	0.09067613791220772	0.7853596363274583	0.3329504276924071
YBP1	apj1d	-0.26435810968075424	0.38901161593069505	0.3068895704718905
YBP1	sis14xcga	-0.2521754433812079	0.40665715409322656	0.30390248578684415
YBP1	ydj14xcga	0.14661376677691662	0.6230401706007191	0.2982705613664069
YBP1	apj1dsis14x	-0.29170982549496666	0.34143275206605495	0.3066310636419672
YBP1	apj1dydj14x	-0.12180719769648557	0.6817586025856115	0.2970439656307138
PPR1	apj1d	-0.13684884416822524	0.7496107438005881	0.4287880256251609
PPR1	sis14xcga	-0.29246899514399455	0.4931390468716908	0.4267597445270969
PPR1	ydj14xcga	-0.28505768608179044	0.49756926654455275	0.4202411573180823
PPR1	apj1dsis14x	0.013719797082394791	0.9741978494548317	0.42418580300297876
PPR1	apj1dydj14x	-0.14662794266982257	0.7207998104131184	0.4102742505908997
MSG5	apj1d	0.3006079359639223	0.51500112888452	0.46171350656112126
MSG5	sis14xcga	0.3083440055505978	0.4975526410449943	0.45455301893314015
MSG5	ydj14xcga	0.27454664560901904	0.5410202359626166	0.44914069088108916
MSG5	apj1dsis14x	0.1533955526696692	0.7413942035176541	0.46482427314871994
MSG5	apj1dydj14x	0.6643996753932137	0.1262311727503337	0.43449401970023566
PET54	apj1d	0.450808789422384	0.09251203679953288	0.2679728132873411
PET54	sis14xcga	0.42093066486826275	0.11480753282798671	0.2669274534477731
PET54	ydj14xcga	0.10806671981765771	0.68584249499533545	0.26715891532657343
PET54	apj1dsis14x	0.4636641919626525	0.08323247371408474	0.2676688272030201
PET54	apj1dydj14x	-0.08732945010441383	0.7427274470372729	0.26605069216192256
NOP10	apj1d	1.00165200468391	0.0013943761034836747	0.31342638247079674
NOP10	sis14xcga	0.4268031529636795	0.17342125558005536	0.3135278688996379
NOP10	ydj14xcga	0.3213487860193703	0.3053175664757725	0.3134814390459379
NOP10	apj1dsis14x	0.8030647503292735	0.010410946034132803	0.31346785481828066
NOP10	apj1dydj14x	-0.3064434568534201	0.32838150823889384	0.31353592300832267
YNL198C	apj1d	NA	NA	NA
YNL198C	sis14xcga	NA	NA	NA
YNL198C	ydj14xcga	NA	NA	NA
YNL198C	apj1dsis14x	NA	NA	NA
YNL198C	apj1dydj14x	NA	NA	NA
YPR015C	apj1d	0.3487532541926615	0.6762862331080396	0.8352646617346473
YPR015C	sis14xcga	0.5102185656334514	0.5314777282642412	0.8153688684638513
YPR015C	ydj14xcga	1.1038614940300644	0.16116129518231986	0.7878104448969336
YPR015C	apj1dsis14x	1.1057938536496252	0.16704150667961154	0.8002718977002129
YPR015C	apj1dydj14x	-0.041349385832004454	0.9592322720450694	0.8089161717173005
PHO91	apj1d	-0.0906208956991712	0.8325062758168063	0.428491334217309
PHO91	sis14xcga	0.10241951530660104	0.8068348051816336	0.41887426188772087
PHO91	ydj14xcga	-0.5564956378977479	0.19261020813647348	0.42712201192060223
PHO91	apj1dsis14x	-0.030117672738548342	0.9436526386372315	0.4261145978816419
PHO91	apj1dydj14x	0.3320348578791335	0.41232506667391494	0.4050149553546386
YGR125W	apj1d	-0.5642922753428277	0.11620011675685069	0.3592102400694101
YGR125W	sis14xcga	-0.11838553525088297	0.7349231514672183	0.34964895479593444
YGR125W	ydj14xcga	-0.26081389772127966	0.45366678757171747	0.3480693191428136
YGR125W	apj1dsis14x	-0.8073324946528105	0.026250255386573138	0.36325596233964086
YGR125W	apj1dydj14x	0.03319356007946427	0.9227121969513242	0.3421385915137458
SPE3	apj1d	0.22779662917640423	0.42017205394780177	0.2825830418290739
SPE3	sis14xcga	0.25526588098623054	0.36616045368862626	0.2824710104671094
SPE3	ydj14xcga	-0.2628444528600511	0.35227881606818545	0.28257429257463823
SPE3	apj1dsis14x	-0.2504312167101274	0.37590019090639576	0.2828211479057241
SPE3	apj1dydj14x	-0.47966150033622723	0.08949573903752897	0.28247556267909146
ECO1	apj1d	0.21857182777928832	0.6822941768052109	0.5339686992653822
ECO1	sis14xcga	-0.4154031391799085	0.4502031639376077	0.5501471888098893
ECO1	ydj14xcga	0.4669395661080124	0.36193368203327614	0.5121711005092526
ECO1	apj1dsis14x	-0.2781225518803528	0.6150260125093443	0.5530240848457035
ECO1	apj1dydj14x	0.43400789733643064	0.3889652320705258	0.5037843239192891
TFC6	apj1d	-0.5383291208067011	0.10255586114500567	0.3297399036015971
TFC6	sis14xcga	-0.3661340642004426	0.25649370419542217	0.32266539069836714
TFC6	ydj14xcga	-0.13994071314711404	0.6584169272450835	0.3165364157123619
TFC6	apj1dsis14x	-0.25998484709838254	0.42239696327396353	0.3240616538080263
TFC6	apj1dydj14x	0.1661305836286454	0.5920968593211112	0.31006087761434703
AQY3	apj1d	1.5554846916941991	0.031013382530869202	0.7211664903662129
AQY3	sis14xcga	0.28586528338323636	0.7096638658547003	0.7678202360067236
AQY3	ydj14xcga	0.6437650205522558	0.38150635192675014	0.7356270675204363
AQY3	apj1dsis14x	0.6530176592621391	0.38888131323819974	0.757870671346925
AQY3	apj1dydj14x	0.9322893058082974	0.18994453935793104	0.7112677053797068
YBR201C-A	apj1d	0.4351414063606097	0.41588579364862244	0.5348479409983293
YBR201C-A	sis14xcga	0.16422810170117394	0.7592854895508925	0.5359589096537626
YBR201C-A	ydj14xcga	0.3744563867078305	0.47145529316210605	0.5199965508125178
YBR201C-A	apj1dsis14x	0.855066167827409	0.09970506420472589	0.519391288238772
YBR201C-A	apj1dydj14x	0.4878041663072669	0.335381926193859	0.5063728417535761
BUD6	apj1d	-0.1268543500703021	0.689250569362087	0.3172371466603861
BUD6	sis14xcga	-0.37704619583486476	0.23490953570527368	0.31743057592398466
BUD6	ydj14xcga	-0.38226598051284255	0.2229473691319755	0.31365974710219835
BUD6	apj1dsis14x	-0.1203762388889261	0.7037631604978236	0.31657502204022897
BUD6	apj1dydj14x	-0.1655118447118691	0.589633067516689	0.3068626503379102
CWH43	apj1d	-0.2765173744770504	0.45421324574192096	0.36947340477085244
CWH43	sis14xcga	-0.3910895153991288	0.28715154457826864	0.36743026104725657
CWH43	ydj14xcga	0.005825140965246636	0.9870362951106596	0.3585075084492796
CWH43	apj1dsis14x	-0.2528461106038682	0.4925649762984713	0.36845415569879486
CWH43	apj1dydj14x	0.4865552693335851	0.1659869706279034	0.35124911267920494
MUS81	apj1d	-0.7680145272719456	0.04934591751069934	0.39072964438373176
MUS81	sis14xcga	-0.7676283624598111	0.0464383404372991	0.3854741962023725
MUS81	ydj14xcga	-0.1256343073096326	0.7358474515505357	0.3724070860216297
MUS81	apj1dsis14x	-0.57273758980579	0.13736902827865655	0.385510493907294
MUS81	apj1dydj14x	-0.2008201924445298	0.5859321998990961	0.368653141012889
EHT1	apj1d	-0.4217587608951375	0.3474098164100488	0.44885847624556985
EHT1	sis14xcga	0.08521949535281143	0.8413046655000164	0.4256187906757685
EHT1	ydj14xcga	0.3439199038560108	0.40687929644010545	0.41466214106882715
EHT1	apj1dsis14x	0.15392459002739484	0.7197094448602603	0.4289419435839878
EHT1	apj1dydj14x	0.16971347686909186	0.679073258029254	0.41020535927019686
VAC8	apj1d	-0.6315097613410479	0.03490029573310023	0.2993627720650292
VAC8	sis14xcga	-0.5853233613365946	0.048783881424350875	0.29704673450190555
VAC8	ydj14xcga	-0.17003955764563353	0.5612937862773142	0.2927069185989887
VAC8	apj1dsis14x	-0.7318674928746943	0.014728435298534645	0.3000700826016255
VAC8	apj1dydj14x	-0.16913846677633929	0.5609148037607917	0.29087418542107096
MIA40	apj1d	-1.0983711893706285	0.0032949018903266703	0.37374874027903887
MIA40	sis14xcga	-0.4286214419542874	0.2423812073130841	0.36663903788990504
MIA40	ydj14xcga	-0.23534186672325966	0.5187677256268795	0.3647319560833533
MIA40	apj1dsis14x	-0.14446425594535256	0.6931877137129365	0.36616538551871813
MIA40	apj1dydj14x	-0.49422095416498485	0.1743835258904755	0.3638652574917533
YGR114C	apj1d	NA	NA	NA
YGR114C	sis14xcga	NA	NA	NA
YGR114C	ydj14xcga	NA	NA	NA
YGR114C	apj1dsis14x	NA	NA	NA
YGR114C	apj1dydj14x	NA	NA	NA
ELM1	apj1d	-0.8724723732534824	0.03196038194626261	0.40676489667677695
ELM1	sis14xcga	-0.781330735061908	0.04982982852796912	0.3983491461145004
ELM1	ydj14xcga	-0.607230932134474	0.11899077549078664	0.3894943609526928
ELM1	apj1dsis14x	-0.558854982584493	0.1600560169333274	0.3977946264757665
ELM1	apj1dydj14x	-0.41258196473225683	0.2781151201896476	0.38041298973418664
ASI1	apj1d	0.0026675986721520894	0.99261238810859	0.2881046560474352
ASI1	sis14xcga	0.21945384169138768	0.4401393873879375	0.28428215261403883
ASI1	ydj14xcga	-0.15158351871842096	0.5946887589179499	0.28490263370591
ASI1	apj1dsis14x	-0.18226798462756053	0.5293084280284523	0.2897456330079114
ASI1	apj1dydj14x	0.08506898983801879	0.7618207170521456	0.28067169626245664
MSB4	apj1d	-0.23143141975848797	0.4986915105317349	0.3420758538827209
MSB4	sis14xcga	-0.31562054337297224	0.3530571107077582	0.3398608356426622
MSB4	ydj14xcga	0.36920386795860977	0.26455610561260967	0.33092062882970985
MSB4	apj1dsis14x	0.05789712455757669	0.8638857140943773	0.3377305293268213
MSB4	apj1dydj14x	0.25926443062856475	0.4303422118235181	0.3287628652212752
RPL2A	apj1d	0.35785888239310093	0.1893801497596274	0.27267204613252527
RPL2A	sis14xcga	0.43992481145743	0.10663602132348532	0.27265257801690446
RPL2A	ydj14xcga	0.24383390831283822	0.37115722292912323	0.2726509886657119
RPL2A	apj1dsis14x	0.22058858659852199	0.41852895529313844	0.2726763074537891
RPL2A	apj1dydj14x	-0.008544981990294789	0.9749971803879239	0.27264097720869124
SPT5	apj1d	-0.13763409346023744	0.6408191353892693	0.2950015377360516
SPT5	sis14xcga	-0.31910035790531766	0.27841313356950276	0.29440262897121566
SPT5	ydj14xcga	-0.5212261720243894	0.07607351409460758	0.29382445356975717
SPT5	apj1dsis14x	-0.4492522127187532	0.13143041876855263	0.29781680602583005
SPT5	apj1dydj14x	0.14371351938840188	0.6163239752942962	0.28681497946727863
TOM71	apj1d	-0.18646013201694248	0.5869065430867026	0.34318386913429516
TOM71	sis14xcga	-0.06650301925701188	0.8437127566247198	0.33732761836966846
TOM71	ydj14xcga	-0.2245235148631262	0.5037229057096042	0.33578956348946454
TOM71	apj1dsis14x	-0.19743705070781722	0.564442195610454	0.3426204142927831
TOM71	apj1dydj14x	0.1825969760795242	0.5766032739596966	0.327027766928186
YDL023C	apj1d	NA	NA	NA
YDL023C	sis14xcga	NA	NA	NA
YDL023C	ydj14xcga	NA	NA	NA
YDL023C	apj1dsis14x	NA	NA	NA
YDL023C	apj1dydj14x	NA	NA	NA
SFT1	apj1d	1.1321763813579244	4.3116855077983266e-4	0.3216197676059213
SFT1	sis14xcga	0.6496806430353799	0.043796320837863695	0.32225663632127594
SFT1	ydj14xcga	0.3574077678844975	0.2676224686989068	0.3224088733595454
SFT1	apj1dsis14x	1.0633528083033859	9.462455876802444e-4	0.3216394204426382
SFT1	apj1dydj14x	0.14220704880674329	0.6584293146819813	0.3216751694940106
CLB1	apj1d	0.45210973791646114	0.07440606226742282	0.25340935169080453
CLB1	sis14xcga	0.46058593842102663	0.06768982761998613	0.2520904590533569
CLB1	ydj14xcga	0.29482968591084824	0.24150137038097239	0.2517238911762147
CLB1	apj1dsis14x	0.20831657227891315	0.41305261345729877	0.25449974710556256
CLB1	apj1dydj14x	0.07600236175188302	0.7618102392314936	0.2507464141152972
VPS27	apj1d	-0.02248166185641511	0.9678814647849536	0.5583357036930554
VPS27	sis14xcga	-0.3401091311826153	0.5445502998609042	0.5612857701496172
VPS27	ydj14xcga	-0.3705546141839003	0.5020452308992769	0.5520159461167864
VPS27	apj1dsis14x	-0.02304244698591468	0.96696070389161	0.5563059477394569
VPS27	apj1dydj14x	0.14268061083140576	0.7859400709275937	0.525359958466277
RTT107	apj1d	-0.5225865772510325	0.0778763560675551	0.29639487263880365
RTT107	sis14xcga	-0.7740248890526317	0.009079460880326717	0.2966695148743073
RTT107	ydj14xcga	-1.0447882844871508	4.239516049821231e-4	0.2964184870246201
RTT107	apj1dsis14x	-0.8314435319860928	0.005585834257104256	0.30003533835688107
RTT107	apj1dydj14x	-0.6474159026619444	0.024999044513365546	0.2888421746423586
MHR1	apj1d	-0.16745442703383712	0.5618381840370319	0.2886581184004015
MHR1	sis14xcga	-0.03810451271318552	0.8939345214139195	0.2857967325395536
MHR1	ydj14xcga	0.14330495862168788	0.6132718911381592	0.28354278738749095
MHR1	apj1dsis14x	-0.061342530320198894	0.8309191750063686	0.28728790751605787
MHR1	apj1dydj14x	-0.22499282097380208	0.42666070482048213	0.28303872678238823
ECM31	apj1d	0.1255850999244732	0.6379527023677185	0.2668825435394341
ECM31	sis14xcga	0.15623489244879038	0.5544872339228569	0.26433468628727075
ECM31	ydj14xcga	0.31321026582915085	0.23098883010132018	0.26148455366074347
ECM31	apj1dsis14x	0.15667236641714705	0.5559197807170858	0.26603661928114114
ECM31	apj1dydj14x	0.09330079986452298	0.7197876566901604	0.26007728078411846
SPH1	apj1d	-0.7843342541050287	0.3517204284252075	0.8422314256878636
SPH1	sis14xcga	-1.0233814093035356	0.22432116154197995	0.8422075624620803
SPH1	ydj14xcga	-1.7411534532118622	0.04680721735916338	0.8758139000375096
SPH1	apj1dsis14x	-0.9983002128023747	0.2429238850994594	0.8549215765824918
SPH1	apj1dydj14x	-1.1395065004632354	0.1581037087387116	0.8073143718003106
MTF2	apj1d	-0.4583519285605848	0.14535472906610142	0.3147725135409915
MTF2	sis14xcga	-0.2643099318285301	0.3917433365560283	0.30860741021254473
MTF2	ydj14xcga	-0.19170322696852382	0.5295248915242187	0.30490478898258316
MTF2	apj1dsis14x	-0.18949341727978716	0.5412621755349956	0.31018452492689297
MTF2	apj1dydj14x	-0.31927871041855416	0.29047575504614687	0.30203878464882505
YAR047C	apj1d	NA	NA	NA
YAR047C	sis14xcga	NA	NA	NA
YAR047C	ydj14xcga	NA	NA	NA
YAR047C	apj1dsis14x	NA	NA	NA
YAR047C	apj1dydj14x	NA	NA	NA
1	apj1d	0.26972976123879283	0.3233520492399476	0.27311835930810696
1	sis14xcga	0.4641533362822234	0.08785034153233613	0.2719359809560273
1	ydj14xcga	-0.26600410847395867	0.33026366673016977	0.2732218294383635
1	apj1dsis14x	0.018197206255429255	0.9469982493886839	0.2737378106546005
1	apj1dydj14x	-0.3980438149025467	0.14378999920011148	0.2722929469496258
PRO3	apj1d	-0.0449477407923391	0.856240179387826	0.24810757517878146
PRO3	sis14xcga	-0.05771726266313687	0.8153478171400612	0.24714857633049897
PRO3	ydj14xcga	0.3180325232886949	0.195093887778242	0.24546054230357103
PRO3	apj1dsis14x	0.04902986373743248	0.8429428694590202	0.24746232598823317
PRO3	apj1dydj14x	0.2022225717890022	0.4086228401430241	0.2447268361554207
RPS4A	apj1d	-0.06766324261383216	0.7725808640272593	0.23412832352864343
RPS4A	sis14xcga	-0.07260321223140609	0.7564168829683785	0.23406085925404588
RPS4A	ydj14xcga	0.26124642017049565	0.2641566713225606	0.23396171466155632
RPS4A	apj1dsis14x	-0.16000573890129766	0.4943491931378089	0.23412922575601305
RPS4A	apj1dydj14x	0.1496628854081638	0.5222846707609987	0.23391125914646854
YMR1	apj1d	-0.21867506674536488	0.5320959347385771	0.349986646114041
YMR1	sis14xcga	-0.23300111922577088	0.5021828152412795	0.34721395402436567
YMR1	ydj14xcga	-0.28825881805356124	0.40328028477917605	0.3448991382878488
YMR1	apj1dsis14x	-0.5127040586206086	0.1471433957390754	0.35366322675170886
YMR1	apj1dydj14x	-0.21347039329145642	0.5307298067553236	0.3405216153314749
YDR433W	apj1d	-0.751021865888121	0.021019689290993078	0.32545150665708905
YDR433W	sis14xcga	-0.4305910247034854	0.1763769671225869	0.3184857020920376
YDR433W	ydj14xcga	-0.35665865444184575	0.2583478443160113	0.3155420362160314
YDR433W	apj1dsis14x	-1.0387300985258385	0.0016033812818479099	0.3292026369772275
YDR433W	apj1dydj14x	-0.570752959189815	0.06883695139445303	0.3136887050591113
WIP1	apj1d	1.1607746749946397	0.07648912145289263	0.655275270543613
WIP1	sis14xcga	0.7577382490237028	0.24771487485798252	0.6555296572729138
WIP1	ydj14xcga	0.10395053378327061	0.874188564470034	0.6565003306306171
WIP1	apj1dsis14x	1.3518151541161432	0.03898645473960915	0.6548445581084935
WIP1	apj1dydj14x	-0.13399211640564979	0.8381340903841586	0.6559213151861049
CIR1	apj1d	0.16391371943951846	0.47916074048828494	0.23163006164501312
CIR1	sis14xcga	0.4096047886159064	0.07514581560301806	0.23017022326553546
CIR1	ydj14xcga	0.21050509528889066	0.3602862946258128	0.2301055572779409
CIR1	apj1dsis14x	0.2572170522125012	0.26571018355006487	0.2311033208150505
CIR1	apj1dydj14x	0.07472638163659431	0.7446123033998177	0.22939682416928628
ASE1	apj1d	-0.10294571061316912	0.8181844528119633	0.4478222767535472
ASE1	sis14xcga	-0.2260760916988561	0.611055082527364	0.44453466116320045
ASE1	ydj14xcga	-0.13668248188803886	0.7530670994391344	0.43446747025229343
ASE1	apj1dsis14x	-0.2809063981158819	0.5349614758588427	0.45274613324924934
ASE1	apj1dydj14x	0.14373148147906212	0.7328182030045525	0.42103186544194987
LEM3	apj1d	-0.03543427744541246	0.9056361881275425	0.29891103110070955
LEM3	sis14xcga	-0.10324256869741366	0.7280328804204544	0.2968929417352798
LEM3	ydj14xcga	-0.013646406713949623	0.9628809893827893	0.2932278623413889
LEM3	apj1dsis14x	-0.24022116729901863	0.4250470241390108	0.30114381718343697
LEM3	apj1dydj14x	0.22128391453365706	0.44286124731706955	0.28836645011147494
YAL056C-A	apj1d	NA	NA	NA
YAL056C-A	sis14xcga	NA	NA	NA
YAL056C-A	ydj14xcga	NA	NA	NA
YAL056C-A	apj1dsis14x	NA	NA	NA
YAL056C-A	apj1dydj14x	NA	NA	NA
SNF8	apj1d	0.5324870707571486	0.039799666796152364	0.2590141774379457
SNF8	sis14xcga	0.40898608797993063	0.11338907199568546	0.2583381991632119
SNF8	ydj14xcga	0.38196741266089357	0.1375970076750798	0.25725188759741396
SNF8	apj1dsis14x	0.3474188613441867	0.1811330300752262	0.25979620811106247
SNF8	apj1dydj14x	0.04567556698727611	0.8587928439690762	0.2567326239044367
DAN1	apj1d	-2.9088317500550125	0.09671486316558423	1.751260747187005
DAN1	sis14xcga	-0.010876642462351397	0.9926036697732182	1.173308997307758
DAN1	ydj14xcga	0.1028708836839406	0.9286496634232648	1.1488317930629754
DAN1	apj1dsis14x	0.2597458346609603	0.8240793737427714	1.1684406931398061
DAN1	apj1dydj14x	-1.0923124160668503	0.3632288172666285	1.2013600640174646
PHO85	apj1d	-0.1508817050099617	0.6685535556248144	0.3524170022096796
PHO85	sis14xcga	-0.00948295954573702	0.9780496976907539	0.3446582359667072
PHO85	ydj14xcga	0.41237227554041544	0.21881867565367663	0.33535050757678936
PHO85	apj1dsis14x	0.2563313256590364	0.45547976715964306	0.343464639906632
PHO85	apj1dydj14x	0.25035810622278465	0.45104814753372646	0.33218586328077837
YNL319W	apj1d	0.12018228678534089	0.881493606801189	0.8061809337256653
YNL319W	sis14xcga	0.1812841265820917	0.818065644679306	0.7880766563588709
YNL319W	ydj14xcga	0.08810998968797303	0.9096983966823478	0.7768540446799087
YNL319W	apj1dsis14x	0.4204886411618651	0.5925946145456977	0.7858427279769817
YNL319W	apj1dydj14x	0.6333656637109703	0.3921460385104656	0.7401448905169712
NTA1	apj1d	-0.13280667980394692	0.6809733297089119	0.32302427196946254
NTA1	sis14xcga	-0.13272310773938684	0.6781353131008195	0.3198077802033156
NTA1	ydj14xcga	0.12582747278511872	0.6890233422588037	0.3144265474443319
NTA1	apj1dsis14x	-0.10515627864610629	0.7440030961280989	0.3220152437374781
NTA1	apj1dydj14x	0.188882600697509	0.5431627891953439	0.31064315605689824
CAT8	apj1d	0.6143428012929473	0.4123150647621962	0.7493571599934554
CAT8	sis14xcga	0.5978020625856034	0.4183933244158381	0.738746094812298
CAT8	ydj14xcga	0.2924208071341086	0.6924765164491565	0.7393765039084621
CAT8	apj1dsis14x	0.37806408654201606	0.619276317994243	0.7608817763845179
CAT8	apj1dydj14x	0.2819225647341434	0.6962332954561121	0.722118972421245
FYV6	apj1d	0.5970106444095756	0.03962200249392822	0.29013942439633333
FYV6	sis14xcga	0.5216460996552738	0.0705950127460351	0.2885092936861764
FYV6	ydj14xcga	0.1708842749021565	0.5547915666643308	0.28934238747107466
FYV6	apj1dsis14x	0.45586765248669775	0.11729322521671301	0.29105924193588323
FYV6	apj1dydj14x	-0.10041036905361599	0.7270992844713713	0.28771974754556384
CAF20	apj1d	0.563852467731961	0.015947038523465067	0.23395150687901703
CAF20	sis14xcga	0.3884998106736183	0.09673750375449108	0.23391199669391638
CAF20	ydj14xcga	0.1540154600269249	0.5102455960711736	0.23390419147564306
CAF20	apj1dsis14x	0.2201360772018609	0.3470783813691539	0.23411972788099464
CAF20	apj1dydj14x	-0.30681020339303117	0.18962116911807717	0.23390261454060213
YOR015W	apj1d	-0.3586416188787062	0.35610876654970386	0.38864285309797425
YOR015W	sis14xcga	-0.636022920381512	0.10241887888195247	0.3894244361297412
YOR015W	ydj14xcga	-0.7045346095036749	0.06774935721379144	0.3856933632916643
YOR015W	apj1dsis14x	-0.4304379341104092	0.2688805046880468	0.3893095922879731
YOR015W	apj1dydj14x	-0.32751891186521465	0.3828795687307809	0.3753355831578513
SUL2	apj1d	0.0797361201680799	0.9003834946739808	0.6369874333806897
SUL2	sis14xcga	0.22110021336544902	0.7206138317290987	0.6182225567873407
SUL2	ydj14xcga	0.2481640270267885	0.6819965507867032	0.6056619244128694
SUL2	apj1dsis14x	1.074404395494218	0.07057041136671612	0.594173998835717
SUL2	apj1dydj14x	1.062846140665439	0.06406276629805328	0.5739707189695742
QCR9	apj1d	1.006321870056993	0.0010857918408859128	0.3079981561788877
QCR9	sis14xcga	0.497885867250211	0.10674002851352156	0.30866677199437365
QCR9	ydj14xcga	0.7629726983128274	0.013065121390573612	0.3074037068774186
QCR9	apj1dsis14x	0.819652534533659	0.00784650851754362	0.3083018291520652
QCR9	apj1dydj14x	0.2894063594883103	0.3464599352578797	0.3073957604081452
YIM2	apj1d	-0.3677946344426146	0.7919310117920254	1.3941969882992002
YIM2	sis14xcga	-1.059382289140736	0.4685473131449267	1.4615300320274338
YIM2	ydj14xcga	0.03233714045747751	0.9802381999507255	1.3054816271926795
YIM2	apj1dsis14x	0.0858210922817486	0.9488979173562035	1.3390545214073077
YIM2	apj1dydj14x	-0.5388314188466885	0.6818155782124542	1.3142650567693195
MDJ2	apj1d	-0.8538252712907536	0.6091956877296544	1.6701656890542362
MDJ2	sis14xcga	0.9107032620316092	0.5102259279470123	1.3830261287413115
MDJ2	ydj14xcga	0.7793592224907288	0.5705647024119749	1.373998067426903
MDJ2	apj1dsis14x	1.1116116080852576	0.42142859057360416	1.3826956458704605
MDJ2	apj1dydj14x	-2.574540705379374	0.16338221439600456	1.8471562828767594
THI13	apj1d	0.4046225252527012	0.5481091486242289	0.6737017422418957
THI13	sis14xcga	0.6997845498219962	0.28017173998423955	0.6479884835494162
THI13	ydj14xcga	1.0274747615661528	0.10133984240809506	0.6271236963879319
THI13	apj1dsis14x	0.7390869705660478	0.2591001848906156	0.6549167716887299
THI13	apj1dydj14x	0.6925748479806696	0.26725997373645705	0.6242817687713196
MAL11	apj1d	-0.7678786745918139	0.2670615282140545	0.6918729895335556
MAL11	sis14xcga	-0.0547204401985148	0.9315043731250859	0.6366376466691904
MAL11	ydj14xcga	-0.2778398211129909	0.6612504151075852	0.6340661504939231
MAL11	apj1dsis14x	0.6076715647510654	0.3263625687315515	0.6191462890682523
MAL11	apj1dydj14x	0.021198131176228655	0.9722559126455511	0.6095083337306293
RPB10	apj1d	0.6884335070143479	0.010721425102539532	0.26979937889591393
RPB10	sis14xcga	0.47178279047631727	0.08029919469822655	0.26975159970961876
RPB10	ydj14xcga	0.2037590389333872	0.45009577127239064	0.26978826878235945
RPB10	apj1dsis14x	0.5104432426807828	0.058598245387167784	0.2699050572141697
RPB10	apj1dydj14x	-0.367202802411823	0.1736365579565551	0.26988075272123363
RSM28	apj1d	-0.13952917071899631	0.6149887351669632	0.27741316714485004
RSM28	sis14xcga	-0.221974029344478	0.42178618582159294	0.2763186533372856
RSM28	ydj14xcga	0.10874084278277205	0.6909077685409784	0.2734769325809945
RSM28	apj1dsis14x	0.08690264533670236	0.752583676831323	0.27567626203252427
RSM28	apj1dydj14x	-0.35094097857932927	0.19935580785325438	0.2734486306289185
COX17	apj1d	0.9571978925648535	0.11667159020604788	0.6101082315231826
COX17	sis14xcga	0.7732909902412308	0.20490856048425546	0.6099999138224637
COX17	ydj14xcga	0.15369437439906686	0.8012428374008927	0.6105307327279754
COX17	apj1dsis14x	1.1952528969680924	0.04997194437062077	0.6097594237881689
COX17	apj1dydj14x	-0.7905318910274258	0.1959796488898208	0.6113506315590701
BLI1	apj1d	0.8116212653224256	0.006888219221918457	0.30035566878017134
BLI1	sis14xcga	0.7713748707452386	0.009865267835681132	0.29892268039775666
BLI1	ydj14xcga	0.26088567550149855	0.38562369660860646	0.30070465508385297
BLI1	apj1dsis14x	0.951589369346485	0.0014604294776186116	0.29901310094198896
BLI1	apj1dydj14x	0.030050543337088956	0.9199825038525572	0.29914206475851796
YKL066W	apj1d	0.43171754093611164	0.11955547385541868	0.27733897914274686
YKL066W	sis14xcga	0.6209485721949164	0.024504775002367984	0.27608495442925524
YKL066W	ydj14xcga	-0.017572146435792746	0.9494463311589898	0.2771541011948734
YKL066W	apj1dsis14x	0.4752685429795582	0.08624854075464275	0.2770392879098437
YKL066W	apj1dydj14x	-0.5096596853232952	0.06603468311656098	0.27726197731551333
YMR007W	apj1d	0.6643440635142837	0.49942552713497945	0.9836393896624624
YMR007W	sis14xcga	0.7052525992348886	0.46501090365090986	0.965278783873244
YMR007W	ydj14xcga	0.525768627143336	0.5833477328455468	0.9585549232318862
YMR007W	apj1dsis14x	0.3177355802508598	0.7528648036400951	1.009119590330891
YMR007W	apj1dydj14x	-0.1478020772431974	0.8793424588498256	0.9736451433865286
YOR263C	apj1d	NA	NA	NA
YOR263C	sis14xcga	NA	NA	NA
YOR263C	ydj14xcga	NA	NA	NA
YOR263C	apj1dsis14x	NA	NA	NA
YOR263C	apj1dydj14x	NA	NA	NA
YHL049C	apj1d	0.6020584456425639	0.7052405190165705	1.5916697687320613
YHL049C	sis14xcga	0.8190819421414193	0.5985645018136926	1.5558117999520764
YHL049C	ydj14xcga	-2.19598098620665	0.27083054668375567	1.9942579782837493
YHL049C	apj1dsis14x	-0.17099658616345279	0.9188561326698591	1.6784990553546153
YHL049C	apj1dydj14x	-0.6757777928740417	0.677440921000743	1.6246308560629192
GCN5	apj1d	-0.6610331942787959	0.039246400891745636	0.3206417839392123
GCN5	sis14xcga	-0.4667806448212991	0.14081225800967576	0.31693998216149566
GCN5	ydj14xcga	-0.2798128690464311	0.37332321918891936	0.31430264059858376
GCN5	apj1dsis14x	-0.5101587129828177	0.10952683475005492	0.3187847400306245
GCN5	apj1dydj14x	-0.342550947169413	0.27290412908324846	0.312432696048269
GCN3	apj1d	0.1359703295188616	0.6088264745239338	0.2656971456306934
GCN3	sis14xcga	0.15644312124993104	0.5552971805670323	0.26522926156796905
GCN3	ydj14xcga	-0.021666103502291163	0.934866523860529	0.26511445623294966
GCN3	apj1dsis14x	-0.15392702045422055	0.5630822156573145	0.26618563385323385
GCN3	apj1dydj14x	-0.3521530751585763	0.18376721707180227	0.26492717781758146
YHR140W	apj1d	0.853930466012895	0.4148502452672198	1.0472688529491772
YHR140W	sis14xcga	1.8878989132596438	0.05199016821763393	0.9715336524639052
YHR140W	ydj14xcga	0.7185549413541201	0.48019278993997544	1.0177939883770923
YHR140W	apj1dsis14x	1.8261991811919076	0.06306843741264039	0.9825096131852565
YHR140W	apj1dydj14x	0.06233444661240627	0.9519267321694516	1.0339546952495573
YHL026C	apj1d	-0.25993397485206265	0.7738314361926333	0.9045370719706605
YHL026C	sis14xcga	0.1967751148961966	0.818912585928252	0.8594908558571803
YHL026C	ydj14xcga	-0.9914913589950036	0.2820516121251424	0.9216985178855025
YHL026C	apj1dsis14x	-0.28559799099689015	0.7520087389162555	0.9038145896477197
YHL026C	apj1dydj14x	-0.08224377198051834	0.921961197078953	0.8395339877192454
ATP11	apj1d	-0.3886695764104914	0.1568798953956755	0.2745532785853985
ATP11	sis14xcga	-0.028561729504278544	0.915655855471772	0.26968597689669477
ATP11	ydj14xcga	0.21256467523390388	0.42615274803666986	0.26711073488305465
ATP11	apj1dsis14x	0.15466708038034246	0.566417554067107	0.26976714458357487
ATP11	apj1dydj14x	-0.37778974149970623	0.158131016978938	0.2676729912841324
FEX2	apj1d	-0.24208643887982745	0.5685987056166271	0.424626285932242
FEX2	sis14xcga	-0.1457498266435062	0.7271470000777537	0.4177132527227146
FEX2	ydj14xcga	-0.23082186852289865	0.5771577374388888	0.4139996834972911
FEX2	apj1dsis14x	-0.8923700624854274	0.04378365061624039	0.44260959881379713
FEX2	apj1dydj14x	-0.3276287802175875	0.4230021655569917	0.4089105064849868
TIS11	apj1d	-0.2575800508284123	0.39755240111612195	0.3044679238073985
TIS11	sis14xcga	0.10601104431330581	0.723603367528799	0.29976505568842
TIS11	ydj14xcga	-0.8571294855792227	0.004989148303935277	0.3052745071905718
TIS11	apj1dsis14x	0.006007655751824618	0.9841236783422882	0.3019023890387771
TIS11	apj1dydj14x	-1.2027814177021474	7.75171746800244e-5	0.30435143124272823
PTP2	apj1d	-0.3731316842118073	0.4398230110311493	0.48302328730934074
PTP2	sis14xcga	0.030209630539082353	0.9478673943396464	0.4620262827420402
PTP2	ydj14xcga	-0.8875620434128224	0.06590517634386728	0.48261511539862345
PTP2	apj1dsis14x	0.22186671155713175	0.6312251353553107	0.46221925829216776
PTP2	apj1dydj14x	0.23365284068585776	0.5981448850758495	0.4433050274190139
FRT1	apj1d	-0.5801635427448922	0.16053379941407572	0.4134343484826633
FRT1	sis14xcga	-0.576259159493484	0.15651892044153098	0.4067108146460057
FRT1	ydj14xcga	-0.777262221600514	0.054846531119457864	0.4048050966927919
FRT1	apj1dsis14x	-0.12050539573052173	0.7635417925283652	0.40057230832001517
FRT1	apj1dydj14x	-0.27479482064646393	0.47813771080083445	0.3874163752676873
PET191	apj1d	0.6968196050401156	0.06054843270823671	0.371284909505306
PET191	sis14xcga	0.8982656327125939	0.01495471990030756	0.36912895985443034
PET191	ydj14xcga	0.4172694308444959	0.2597235570440387	0.3702332380691069
PET191	apj1dsis14x	1.138702204377528	0.002026729872717481	0.36895536478261876
PET191	apj1dydj14x	-0.09892377285469345	0.789408725182937	0.3703921313661789
TAD2	apj1d	0.16581453555303538	0.5365884408875872	0.2683169396866548
TAD2	sis14xcga	0.1384181620313268	0.6031111495818153	0.26622371824368835
TAD2	ydj14xcga	0.18995618226865965	0.4713455208500851	0.2637212507755427
TAD2	apj1dsis14x	0.23174936206504523	0.38574577114371117	0.267189909691776
TAD2	apj1dydj14x	0.003399506549377869	0.9896451552263996	0.26193899640644014
RAD33	apj1d	0.6160121196964717	0.03053837894281015	0.28479045266328323
RAD33	sis14xcga	0.5314345959208802	0.061176555424487605	0.2838530623570629
RAD33	ydj14xcga	0.26216267874485755	0.35581852166539113	0.2839218451187537
RAD33	apj1dsis14x	0.6696906339002765	0.018445152015036995	0.28418160473109727
RAD33	apj1dydj14x	-0.03699947728215283	0.8960194498964131	0.2831057156610458
VOA1	apj1d	0.6641722624249218	0.010558880521330739	0.25974988945949257
VOA1	sis14xcga	0.7329182328887237	0.004728989718719619	0.25944585837334017
VOA1	ydj14xcga	0.06390402787587747	0.8057410562872135	0.2598527389443654
VOA1	apj1dsis14x	0.13492466200445608	0.6043339774436313	0.2603827693441548
VOA1	apj1dydj14x	0.19554541478622767	0.45076161690524813	0.25929387677098076
TGL4	apj1d	-0.07149551680980373	0.8987297767338681	0.5617796658129536
TGL4	sis14xcga	-0.12166145631687984	0.8265994467306537	0.5553670338834558
TGL4	ydj14xcga	-0.30329635574829233	0.5836177252210273	0.5533514153599302
TGL4	apj1dsis14x	0.12442605244460184	0.8222627914824944	0.5539018272871733
TGL4	apj1dydj14x	-0.13252091525268986	0.8056940130139664	0.538736235225327
TSL1	apj1d	0.18295667741767496	0.7474943830334063	0.5682855567977976
TSL1	sis14xcga	0.17758137875623373	0.7500954059859793	0.5575316023620458
TSL1	ydj14xcga	0.4204777853553236	0.4349867115019234	0.5385998226333991
TSL1	apj1dsis14x	1.353210811879371	0.009999044523027805	0.5253428293421157
TSL1	apj1dydj14x	1.5395127276533653	0.002389781518299019	0.5069257935904966
MKS1	apj1d	0.23419101213369892	0.5386116464841411	0.3808517727734976
MKS1	sis14xcga	-0.3795932184723875	0.3306621002015713	0.390214419610995
MKS1	ydj14xcga	-0.040586193930499344	0.9140244197998455	0.37592414911753086
MKS1	apj1dsis14x	0.23346998335449365	0.5387457818923892	0.37980464210099585
MKS1	apj1dydj14x	0.38852679463425255	0.28439631355222167	0.36294106662781195
HSP78	apj1d	0.4759995697090861	0.15545005386538757	0.3350831506993151
HSP78	sis14xcga	1.3819223688484696	2.081159556692483e-5	0.32469974320449524
HSP78	ydj14xcga	0.10537403204933643	0.7519108847444138	0.3333347906248456
HSP78	apj1dsis14x	1.8556611774797147	9.372609628501148e-9	0.32318972599254
HSP78	apj1dydj14x	2.209105991366273	4.321124797726644e-12	0.31894645068257105
YKR011C	apj1d	0.17850272069886822	0.5231433106619755	0.27956240721406245
YKR011C	sis14xcga	0.6385592689656018	0.02043125699554268	0.2754390350942769
YKR011C	ydj14xcga	0.0607209329231583	0.8265553573987098	0.277110720083979
YKR011C	apj1dsis14x	0.3855482967715256	0.16517263757244055	0.2777959398635364
YKR011C	apj1dydj14x	0.4137999995668569	0.1304115819661479	0.2735902414368099
UTP21	apj1d	-0.3530283917208379	0.19988682915276135	0.2754002151426589
UTP21	sis14xcga	-0.8857143939531281	0.0014141532042002752	0.27750147341315934
UTP21	ydj14xcga	-0.7133522045272535	0.009348289962260661	0.2744668067726082
UTP21	apj1dsis14x	-0.533495553921693	0.05354648517162464	0.27635278882887326
UTP21	apj1dydj14x	-0.21776316413526534	0.42055126106793095	0.270357000024922
YMR173W-A	apj1d	0.09018929664270327	0.718340889840182	0.25005555232015475
YMR173W-A	sis14xcga	0.057308441677839	0.8185140554823704	0.24975722545016477
YMR173W-A	ydj14xcga	-0.323072460978736	0.19612375513184335	0.24992566117606638
YMR173W-A	apj1dsis14x	-0.48917783484138955	0.05129752414560796	0.25099140439480827
YMR173W-A	apj1dydj14x	0.2932072592304397	0.2387398563198912	0.24887252063316742
VBA1	apj1d	0.218447761528358	0.5041984089148114	0.32706732205962463
VBA1	sis14xcga	0.2735296389578497	0.3985449344427417	0.32400173221441847
VBA1	ydj14xcga	0.27451490750323243	0.393107194866193	0.3214475257694521
VBA1	apj1dsis14x	0.011515669321972241	0.9721023891986199	0.32928634257079303
VBA1	apj1dydj14x	0.6674132141367624	0.03485069273710639	0.31629624248332877
YML094C-A	apj1d	NA	NA	NA
YML094C-A	sis14xcga	NA	NA	NA
YML094C-A	ydj14xcga	NA	NA	NA
YML094C-A	apj1dsis14x	NA	NA	NA
YML094C-A	apj1dydj14x	NA	NA	NA
YBR056W-A	apj1d	-0.10419262932634539	0.8159794690839733	0.44771825918026215
YBR056W-A	sis14xcga	0.37769118975752886	0.384306953519765	0.43413378452931073
YBR056W-A	ydj14xcga	0.8663614366602057	0.041837197328975	0.42570199994200414
YBR056W-A	apj1dsis14x	0.09180446769510683	0.8356081927168203	0.44240059056396674
YBR056W-A	apj1dydj14x	-0.3179763782913521	0.46366640594123437	0.43390612560224906
SPB1	apj1d	-0.6520268311911189	0.047746994680435736	0.32937080354730236
SPB1	sis14xcga	-1.011626229128367	0.0021639376543542035	0.32986826312679635
SPB1	ydj14xcga	-0.8742782972440017	0.007755567719588908	0.3283637470844417
SPB1	apj1dsis14x	-0.7858559622204868	0.01716853553197601	0.3297650418254213
SPB1	apj1dydj14x	-0.6745206366812273	0.038968331710299654	0.3267201404912403
SRX1	apj1d	0.40811468347823343	0.48189685331501997	0.5803224825917348
SRX1	sis14xcga	1.215501812222218	0.02927152873777397	0.5576181706482614
SRX1	ydj14xcga	0.8755314673108627	0.1170476322930755	0.5586286942852284
SRX1	apj1dsis14x	0.8307392936523456	0.14388651892774143	0.5684272187122423
SRX1	apj1dydj14x	0.05668247056605562	0.9201314539029785	0.5653089099379627
IZH1	apj1d	-0.038442451363693814	0.9137827420190396	0.3550660267421028
IZH1	sis14xcga	0.01255970580945619	0.9715635171435749	0.3523316658104404
IZH1	ydj14xcga	-0.29040423028752865	0.41032719324596245	0.35272426740164564
IZH1	apj1dsis14x	-0.08448295476600388	0.8119004555110909	0.35500763341847874
IZH1	apj1dydj14x	0.5505164469856758	0.11096983059797841	0.34540060086504804
SNC1	apj1d	0.6537534591775652	0.02036715528242066	0.2818492647004947
SNC1	sis14xcga	0.9797556460812564	4.1470326422079427e-4	0.2775082695609154
SNC1	ydj14xcga	0.822364916917724	0.0030028830117939842	0.2771291698299939
SNC1	apj1dsis14x	0.8351922400421998	0.0028341514807410724	0.27977989347568755
SNC1	apj1dydj14x	1.0196366242580959	1.9860026213419703e-4	0.2740376448435021
CSM3	apj1d	-0.03718355983767786	0.8902943997427232	0.269579515196971
CSM3	sis14xcga	-0.052104854655359405	0.8454162715504999	0.26724521410408175
CSM3	ydj14xcga	-0.04069478948360526	0.8779299699113232	0.26495060803450543
CSM3	apj1dsis14x	0.020259201715688957	0.9398458369189974	0.2684631349436096
CSM3	apj1dydj14x	0.09277939074829082	0.722392102466122	0.2611564593001185
STP4	apj1d	0.747878742304428	0.3763249789149319	0.8453588379694841
STP4	sis14xcga	0.21753337731689906	0.8006063754144597	0.8613054144825742
STP4	ydj14xcga	0.8941084897398016	0.2743906587408231	0.8180262009414385
STP4	apj1dsis14x	0.6976859719240857	0.40912813758248967	0.8452405515215483
STP4	apj1dydj14x	0.14235510944652757	0.8636454426255392	0.8289204901244188
RPL8B	apj1d	-0.305929231031323	0.28477579499066	0.28600807905675263
RPL8B	sis14xcga	-0.2102209393550401	0.462259710110411	0.28596391179328623
RPL8B	ydj14xcga	0.03412621656534388	0.9049943655160004	0.2859227377301699
RPL8B	apj1dsis14x	-0.640635716807694	0.02511508396770466	0.28604559302807153
RPL8B	apj1dydj14x	-0.2867242355738534	0.31593604317470797	0.2859110498353694
YNL097W-A	apj1d	NA	NA	NA
YNL097W-A	sis14xcga	NA	NA	NA
YNL097W-A	ydj14xcga	NA	NA	NA
YNL097W-A	apj1dsis14x	NA	NA	NA
YNL097W-A	apj1dydj14x	NA	NA	NA
DPB4	apj1d	0.06446187065285011	0.8029365583674914	0.25831403614148274
DPB4	sis14xcga	-0.07170646270318243	0.7807496725627087	0.2576197884254146
DPB4	ydj14xcga	0.10197680596698763	0.6900002239400793	0.25567403413359946
DPB4	apj1dsis14x	0.044990466598838035	0.8615994625096478	0.2580638970430563
DPB4	apj1dydj14x	-0.24628292646721797	0.33451402146281856	0.2551992104085889
DPL1	apj1d	0.06236026066356047	0.8665811338878103	0.37118600303632304
DPL1	sis14xcga	0.0863596531576527	0.8134985930716705	0.3660625076040455
DPL1	ydj14xcga	-0.04450504435596777	0.9026381913512046	0.3638133090320564
DPL1	apj1dsis14x	0.2511812250033022	0.4932954527899162	0.36664680697956203
DPL1	apj1dydj14x	0.43758138362115767	0.2145984980058611	0.3525982778112575
ATH1	apj1d	0.6941197411623626	0.243377519353795	0.5950008166465269
ATH1	sis14xcga	0.38827222914154746	0.5159117804974738	0.5976543869835087
ATH1	ydj14xcga	0.7829901455444069	0.17553950666025595	0.578015741949416
ATH1	apj1dsis14x	1.370572476944247	0.017314280398097587	0.5758792466794265
ATH1	apj1dydj14x	0.5024812997382785	0.38189785512878477	0.5746552525405118
SIS2	apj1d	-0.14160830643628092	0.6910460018479972	0.3563047144815924
SIS2	sis14xcga	-0.5097868971787535	0.15542277263392876	0.35884427920215684
SIS2	ydj14xcga	-0.7511368920633645	0.03596097405236441	0.35813302208990955
SIS2	apj1dsis14x	-0.4388067737106083	0.22495524817351384	0.36161715775637465
SIS2	apj1dydj14x	-0.012649132500490708	0.9704325730284388	0.3412619244798189
TRK1	apj1d	-0.012253962463539759	0.9724309617530882	0.35457535577318255
TRK1	sis14xcga	-0.1105507236268246	0.7535793005524896	0.3521583995934071
TRK1	ydj14xcga	-0.639676191868398	0.07288460660146989	0.3566531524916144
TRK1	apj1dsis14x	-0.22287214646134493	0.533875776591217	0.35825745391765873
TRK1	apj1dydj14x	0.18244102920449648	0.5904723559881107	0.339014158601097
QCR10	apj1d	0.9263837319749152	0.0013239402057190245	0.2885266189211168
QCR10	sis14xcga	0.28906221908597685	0.3218065193782613	0.29176031490928456
QCR10	ydj14xcga	0.755257062331518	0.00833812700380709	0.28629235620890603
QCR10	apj1dsis14x	0.40802229279764324	0.16308000921657473	0.29253371583094867
QCR10	apj1dydj14x	0.22499323554041978	0.4325251310172581	0.2866601557280852
YER067C-A	apj1d	NA	NA	NA
YER067C-A	sis14xcga	NA	NA	NA
YER067C-A	ydj14xcga	NA	NA	NA
YER067C-A	apj1dsis14x	NA	NA	NA
YER067C-A	apj1dydj14x	NA	NA	NA
YIR036W-A	apj1d	NA	NA	NA
YIR036W-A	sis14xcga	NA	NA	NA
YIR036W-A	ydj14xcga	NA	NA	NA
YIR036W-A	apj1dsis14x	NA	NA	NA
YIR036W-A	apj1dydj14x	NA	NA	NA
RPN7	apj1d	0.05557564169508678	0.7902494223654866	0.20894140061834676
RPN7	sis14xcga	0.03214258604437433	0.877578572106334	0.20866453805191948
RPN7	ydj14xcga	0.03054369199931213	0.8834772022100053	0.20840018256510684
RPN7	apj1dsis14x	-0.2135817194978181	0.3074070323102449	0.20925475467294694
RPN7	apj1dydj14x	-0.17406149001716723	0.4030848483727969	0.20817651346226895
THI3	apj1d	-0.7601491699586274	0.1132102959124504	0.47991422156617014
THI3	sis14xcga	-0.33687790539832485	0.46294291402220594	0.45895574878852957
THI3	ydj14xcga	-0.28951839602701784	0.5216890215391223	0.45184722098330643
THI3	apj1dsis14x	-0.5223839851117661	0.2664053022886602	0.47003231555447916
THI3	apj1dydj14x	-0.20737723417070708	0.6392278657807006	0.44237773290019
SHH4	apj1d	-0.33937729938837763	0.47146301542017494	0.471291464963437
SHH4	sis14xcga	0.10749079060894391	0.8107353727614678	0.44885556595264
SHH4	ydj14xcga	-0.02601225051579969	0.9534821571930407	0.44591508762632176
SHH4	apj1dsis14x	0.3121509514309498	0.4865571256025107	0.4486247862212602
SHH4	apj1dydj14x	0.3608745052914427	0.40146886262112474	0.43012415099184487
NQM1	apj1d	0.40938028122821746	0.4416912317450379	0.5321184953274649
NQM1	sis14xcga	1.004455641399513	0.05112911184355291	0.5150012571936664
NQM1	ydj14xcga	0.8493877774723396	0.09822496519601706	0.5136844365868184
NQM1	apj1dsis14x	1.476590004017423	0.0038697197519474333	0.5111800101418702
NQM1	apj1dydj14x	1.3020815181058933	0.009767703051018905	0.5039120086194444
ERB1	apj1d	-0.538635260965552	0.11443673523163589	0.3412191137110157
ERB1	sis14xcga	-0.804517858667819	0.018475366479048776	0.3414833077545431
ERB1	ydj14xcga	-0.9362521493986382	0.005884876495953242	0.3399450505937017
ERB1	apj1dsis14x	-0.6166530436815405	0.07105501593280208	0.3416122474510644
ERB1	apj1dydj14x	-0.4885840514512232	0.14188030587126574	0.3326360226993243
SKO1	apj1d	-0.2673052767303613	0.5181683339158757	0.4136754745301319
SKO1	sis14xcga	-0.8641240412313276	0.041312389607463584	0.42351111268183306
SKO1	ydj14xcga	-0.49304592691348365	0.22602911313678423	0.40725679487158034
SKO1	apj1dsis14x	-0.7427620140980277	0.08118247475870288	0.4259283991564544
SKO1	apj1dydj14x	-0.18909297408200776	0.632455520535004	0.39536573716375245
HST1	apj1d	-0.3550942999873441	0.25989541538821487	0.3151803754910929
HST1	sis14xcga	-0.492019355602349	0.11670440686113213	0.31363629566080287
HST1	ydj14xcga	-0.6832171300056287	0.028815350328313605	0.3125416471425151
HST1	apj1dsis14x	-0.725064883276513	0.02376771302596292	0.32070264038298985
HST1	apj1dydj14x	-0.33223616299174147	0.27470910933099074	0.3041669836917563
YML122C	apj1d	0.5472574605547103	0.7225477892785662	1.5413280448284645
YML122C	sis14xcga	0.5527892950059329	0.7154076484440766	1.5161395758258072
YML122C	ydj14xcga	0.7425282856390092	0.6143905433826333	1.4738078834134534
YML122C	apj1dsis14x	0.9828999029731443	0.5107783163184483	1.4946177834768062
YML122C	apj1dydj14x	-0.4079938091758112	0.7912768256558148	1.5416182169345722
SYT1	apj1d	-0.26170496213371475	0.47221250618283395	0.36404347222560957
SYT1	sis14xcga	-0.7374395658234538	0.045836171434111415	0.3692923972447187
SYT1	ydj14xcga	-0.6032108441288593	0.09448418058870563	0.3607281096893816
SYT1	apj1dsis14x	-0.17159947258932032	0.6353679498780429	0.36188292071817085
SYT1	apj1dydj14x	-0.0739419371229803	0.8319173216005853	0.34838310130035044
QRI1	apj1d	-0.42717360233856616	0.1811983237502689	0.3194837730557975
QRI1	sis14xcga	-0.5681803486804463	0.0735451804213708	0.3175198457718972
QRI1	ydj14xcga	-0.6613551840673401	0.03561450891419628	0.3147359799273684
QRI1	apj1dsis14x	-0.2325062120848999	0.46067991287204985	0.3151653382697036
QRI1	apj1dydj14x	-0.22510397790414624	0.45900414997628575	0.30399423516680113
GRH1	apj1d	-0.5598989447399589	0.13067107618425847	0.37043562521655604
GRH1	sis14xcga	-0.13295654739393675	0.7102072117549136	0.3578161644574096
GRH1	ydj14xcga	0.3353546371000712	0.33692073040799225	0.3492305278262399
GRH1	apj1dsis14x	-0.180509578214135	0.6178417793984444	0.3618068585154205
GRH1	apj1dydj14x	-0.19566505376814383	0.5760006688669422	0.34987921856090104
SUI2	apj1d	-0.262049054103727	0.4048120466491517	0.3145628148453535
SUI2	sis14xcga	-0.02126700661661092	0.9459803779824372	0.31387931483375997
SUI2	ydj14xcga	0.04630044674329701	0.8826138661555559	0.3135686401710878
SUI2	apj1dsis14x	-0.4697096747565373	0.13567975108396627	0.314803206571169
SUI2	apj1dydj14x	-0.17778889686216137	0.5704649566606488	0.3133579128687803
PDR18	apj1d	0.6118734398021933	0.3275102976660612	0.6249083807380066
PDR18	sis14xcga	0.32764381594553266	0.6013851349009061	0.627177948719611
PDR18	ydj14xcga	1.0423431223423403	0.07895652344508264	0.593328320002809
PDR18	apj1dsis14x	1.1998253532335446	0.04621995294819162	0.6019052600842403
PDR18	apj1dydj14x	0.47239698607613567	0.4284053164800247	0.5965185018160145
MSY1	apj1d	-0.049253742118416766	0.8668883524858887	0.29385530730567
MSY1	sis14xcga	0.12927562944074172	0.6542305451290713	0.2886307204278513
MSY1	ydj14xcga	0.204256380358023	0.47403476940917794	0.28530229357995046
MSY1	apj1dsis14x	0.16386751503714472	0.5727112239341741	0.29051276303211143
MSY1	apj1dydj14x	-0.19170673482120884	0.5009218632706438	0.28483707301830524
VMA9	apj1d	0.802367227892547	0.005396108010406589	0.2883739641970212
VMA9	sis14xcga	0.802060836824816	0.005370299679315644	0.2881027923850499
VMA9	ydj14xcga	0.4990619830119836	0.08331586123959316	0.28818154284197656
VMA9	apj1dsis14x	0.8374107571261782	0.003671214342064755	0.2882541844677283
VMA9	apj1dydj14x	0.12022717479171942	0.6764364826580063	0.28808605193566683
ENA5	apj1d	-1.0174375281269188	0.024282314921726496	0.45166595928520914
ENA5	sis14xcga	-0.7942338017685212	0.06964037405026054	0.43777704957099944
ENA5	ydj14xcga	-0.8434274311444109	0.05072481162411533	0.4316855371492625
ENA5	apj1dsis14x	-0.793968411970072	0.07339647752361182	0.4434692321765167
ENA5	apj1dydj14x	-0.45841607562054504	0.2718158875316489	0.41716270164297453
GAT3	apj1d	NA	NA	NA
GAT3	sis14xcga	NA	NA	NA
GAT3	ydj14xcga	NA	NA	NA
GAT3	apj1dsis14x	NA	NA	NA
GAT3	apj1dydj14x	NA	NA	NA
CDC28	apj1d	-0.11088995364471277	0.6782026489733004	0.26725814556703203
CDC28	sis14xcga	-0.3462436356607692	0.19468807207713412	0.2669913431925062
CDC28	ydj14xcga	0.2154503053437488	0.4119013072419954	0.2625674147717403
CDC28	apj1dsis14x	-0.11341648218664256	0.6706665449314105	0.26671584260662196
CDC28	apj1dydj14x	0.13362103191618174	0.6087455864345819	0.2610474754237188
YHR032W-A	apj1d	-0.09311350429233217	0.917387329112703	0.8976930644432994
YHR032W-A	sis14xcga	-0.14750110300850047	0.8672890336264765	0.8826959091631995
YHR032W-A	ydj14xcga	0.6922430664594148	0.3967083389309603	0.8167918832886494
YHR032W-A	apj1dsis14x	0.3104786936547093	0.7190650192218322	0.863139348035662
YHR032W-A	apj1dydj14x	0.44954637308792816	0.5785633066747151	0.809286974066371
ZAP1	apj1d	0.10086468364944161	0.8503661890550925	0.5346622507609341
ZAP1	sis14xcga	0.15922801783099735	0.7611198372639969	0.5237581610207828
ZAP1	ydj14xcga	-0.3476250021658737	0.5133350049443276	0.5318183874192794
ZAP1	apj1dsis14x	0.36356281130482615	0.48741765956507643	0.5235474398584233
ZAP1	apj1dydj14x	-0.26054650984221844	0.6126500127613739	0.5146146665591431
YKL050C	apj1d	0.4918951137997759	0.4857161399139355	0.705591691977072
YKL050C	sis14xcga	0.06819386234229445	0.9240948343286064	0.7157433953328896
YKL050C	ydj14xcga	0.09439663824215619	0.892669274349424	0.6996105843426841
YKL050C	apj1dsis14x	0.2767111267722201	0.6988339176192082	0.7152098175435007
YKL050C	apj1dydj14x	0.1789978195222606	0.7921940853364988	0.679405174990895
HHY1	apj1d	NA	NA	NA
HHY1	sis14xcga	NA	NA	NA
HHY1	ydj14xcga	NA	NA	NA
HHY1	apj1dsis14x	NA	NA	NA
HHY1	apj1dydj14x	NA	NA	NA
RRN7	apj1d	-0.11774111007593123	0.8315195765138171	0.5534167589029464
RRN7	sis14xcga	-0.8781151749876838	0.12784766487645485	0.5767039928245925
RRN7	ydj14xcga	-0.6627704550582492	0.23186231749549666	0.5543527288225653
RRN7	apj1dsis14x	-1.1794592659824417	0.051998979998165065	0.6069855663617146
RRN7	apj1dydj14x	-0.48225846941217304	0.36719891261775595	0.5348131484330714
RPN10	apj1d	-0.4099120795549441	0.16766285146966758	0.297091013902773
RPN10	sis14xcga	-0.29657580598155253	0.31363845082009983	0.29433391741457415
RPN10	ydj14xcga	-0.14008458061233717	0.6316295093203103	0.2921870701762124
RPN10	apj1dsis14x	-0.19816693633616092	0.5017018200798882	0.2949727152767426
RPN10	apj1dydj14x	-0.09237760184979402	0.7500798859011618	0.29000858074268293
SCY1	apj1d	1.0198201018998225	0.26421240108688154	0.9134161533706742
SCY1	sis14xcga	0.188734064478266	0.8420548372848045	0.9471473424385753
SCY1	ydj14xcga	-0.37643150940622916	0.6974560438634452	0.9682955709914952
SCY1	apj1dsis14x	-0.2929383312683609	0.7708279704053125	1.0056516666586328
SCY1	apj1dydj14x	-0.5096482398339987	0.5900301950012401	0.9459085887770533
UGO1	apj1d	-0.7549952878345636	0.08366393810649062	0.4364609881032375
UGO1	sis14xcga	-0.3376022266156623	0.4163060508637175	0.4153332907822039
UGO1	ydj14xcga	-0.15278302889640122	0.706110246997653	0.4051683962887287
UGO1	apj1dsis14x	-0.23899232704815238	0.5675004978954971	0.4180113113690647
UGO1	apj1dydj14x	0.011640972619832704	0.9764959479541192	0.39511522361995877
COX19	apj1d	0.7066598208438224	0.5645420287782961	1.226609487086762
COX19	sis14xcga	-0.09891412723231965	0.9381699083020985	1.2751554563013578
COX19	ydj14xcga	0.4893910369671831	0.6852244525476459	1.2073465571651467
COX19	apj1dsis14x	-0.8019599742010439	0.566415589534335	1.3987550339712342
COX19	apj1dydj14x	0.5861942570990303	0.6180294559419224	1.1755741816626895
YOL162W	apj1d	0.28571911372127773	0.7664006974962498	0.9617380773769751
YOL162W	sis14xcga	1.3181029584779935	0.1281681833931146	0.8663947638405206
YOL162W	ydj14xcga	2.007082121884529	0.015640521831838998	0.8303343020623462
YOL162W	apj1dsis14x	1.2692066737347538	0.14910495487623482	0.8797439074083089
YOL162W	apj1dydj14x	1.5737831180660056	0.05800332847557297	0.830197671809917
RRP4	apj1d	0.08477259618258454	0.7435695375834233	0.25914036536531093
RRP4	sis14xcga	0.05189679914471741	0.8409543788680428	0.25861393470196464
RRP4	ydj14xcga	-0.14205135086680018	0.5826376413581194	0.25849324075943914
[truncated: 29,062 more rows]
